# Supplementary material for: RAC1 controls progressive movement and competitiveness of mammalian spermatozoa
Source: PLoS Genet. 2021 Feb 4;17(2):e1009308. doi: 10.1371/journal.pgen.1009308 (PMC7861394; doi:10.1371/journal.pgen.1009308)
Supplement: S9 Dataset — (XLSX) [file pgen.1009308.s029.xlsx]

## Sheet: 30 min incubation
VAP-Ct	VSL-Ct	VCL-Ct	ALH-Ct	BCF-Ct	STR-Ct	LIN-Ct	VAP-EH1	VSL-EH1	VCL-EH1	ALH-EH1	BCF-EH1	STR-EH1	LIN-EH1	VAP-EH2.5	VSL-EH2.5	VCL-EH2.5	ALH-EH2.5	BCF-EH2.5	STR-EH2.5	LIN-EH2.5	VAP-EH5	VSL-EH5	VCL-EH5	ALH-EH5	BCF-EH5	STR-EH5	LIN-EH5
20.88	4.25	75.28	5.22	44.2	20.34	5.64	119.03	112.42	222.99	11.07	28.56	94.44	50.41	46.39	31.45	121.43	7.02	50.79	67.79	25.9	27.57	7.99	85.92	6.07	54.68	28.99	9.3
40.69	19.4	104.66	10.13	19.71	47.67	18.54	39.8	6.77	114.22	7.71	59.84	17	5.92	50.57	20.02	139.88	14.35	60.52	39.59	14.31	33.58	15.38	99.16	6.31	49.64	45.8	15.51
34.8	10.24	73.46	7.17	46.77	29.42	13.94	116.58	112.48	258.6	10.24	23.69	96.48	43.5	36.08	11.79	69.53	8.68	14.28	32.68	16.96	49.67	5.81	76.06	6.88	16.32	11.69	7.64
84.09	75	220.07	10.26	22.2	89.19	34.08	48.62	37.98	103.78	16.03	38.08	78.11	36.6	19.77	13.65	52.69	3.91	36.72	69.05	25.9	62.34	50.14	125.26	24.03	34.49	80.43	40.03
80.62	76.36	225.53	8.81	26.74	94.71	33.86	25.59	7.83	97.9	7.48	53.54	30.6	8	79.47	71.88	257.85	9.05	37.68	90.45	27.88	34.6	16.23	67.65	3.69	48.28	46.91	24
41.71	27.22	83.08	7.44	37.14	65.27	32.77	117.61	111.89	205.25	10.19	22.44	95.14	54.52	64.67	36.82	137.83	8.28	42.74	56.94	26.71	52.24	30.09	126.59	8.83	37.53	57.6	23.77
29.81	4.86	94.59	6.83	42.44	16.29	5.13	31.52	6.56	71.49	5.61	48.57	20.83	9.18	43.3	23.39	129	9.5	30.37	54.01	18.13	44.68	14.47	84.49	5.74	52.27	32.39	17.13
120.89	118.22	240.28	10.05	27.51	97.79	49.2	37.82	23.04	98.94	5.45	38.52	60.91	23.28	80.93	76.29	174.05	10.48	22.44	94.26	43.83	60.63	42.2	210.16	14.6	42.64	69.61	20.08
119.14	113.35	220.29	9.2	23.8	95.14	51.46	16.36	6.81	52.42	5.73	67.32	41.64	13	28.63	10.8	68.7	4.08	57.75	37.71	15.71	85.21	81.86	228.62	9.43	21.08	96.07	35.81
110.03	103.57	307.12	11.02	24.64	94.13	33.72	124.27	120.59	233.48	10.23	29.92	97.03	51.65	98.19	95.01	197.08	10.66	20.22	96.77	48.21	56.06	13.21	160.71	18.76	37.83	23.57	8.22
43.22	20.32	109.03	8.68	49.52	47.01	18.63	66.55	30.85	229.31	14.03	51	46.35	13.45	119.57	116.14	254.76	8.4	32.77	97.13	45.59	128.91	126.57	211.47	9.1	27.14	98.19	59.85
28.07	1.39	78.52	18.23	107.15	4.95	1.77	119.94	116.49	219.58	7.41	25.05	97.12	53.05	45.42	26.13	184.6	8.04	40.12	57.53	14.16	82.92	76.62	212.08	12.11	17.81	92.4	36.13
89.61	84.14	252.56	9.74	36.18	93.9	33.32	74.24	71.22	152.58	7.96	20.87	95.93	46.68	57.04	31.8	96.73	16.29	183.64	55.74	32.87	60.81	44	210.58	11.54	40.13	72.35	20.89
103.78	95.12	211.4	13.77	23.8	91.66	44.99	85.06	73.34	237.93	9.67	32.44	86.22	30.82	47.31	31.04	110.14	7.23	32.45	65.62	28.18	37.6	16.01	118.75	8.21	60.53	42.56	13.48
76.25	64.68	154.91	7.54	20.19	84.82	41.75	67.42	50.7	184.93	10.12	41.81	75.2	27.42	75.76	34.43	174.6	10.94	23.01	45.44	19.72	42.23	9.15	77.35	5.26	43.78	21.66	11.83
27.76	11.76	90.15	6.66	40.8	42.36	13.04	46.72	15.98	97.91	20.25	35.77	34.2	16.32	44.55	21.61	100.19	7.76	25.84	48.51	21.57	21.9	13.02	66.84	5.11	52.18	59.45	19.48
119.62	113.78	263.49	8.93	29.92	95.12	43.18	17.8	5.85	74.83	5.76	45.33	32.86	7.82	126.98	124.29	245.23	8.8	29.92	97.89	50.69	99.98	78.54	266.41	13.67	23.51	78.55	29.48
54.84	31.29	121.45	10.11	22.96	57.05	25.76	78.81	70.7	226.88	13.19	23.66	89.71	31.16	118.91	116.03	229.02	9.28	29.58	97.58	50.67	38	18.4	98.64	7.33	43.14	48.42	18.66
54.22	12.78	126.21	10.25	52.36	23.57	10.13	65.45	46.59	175.31	9.58	30.95	71.19	26.58	30.92	1.97	54.75	15.68	34.39	6.38	3.6	58.38	33.21	199.51	11.29	40.54	56.88	16.64
51.23	16.44	138.24	8.19	58.46	32.09	11.89	104.21	99.13	224.82	10.25	28.53	95.12	44.09	44.68	17.38	113.92	10.07	23.8	38.9	15.25	44.59	0.99	110.74	15.64	165.92	2.23	0.9
35.35	14.22	115.47	7.4	46.95	40.23	12.32	89.87	83.99	221.79	9.22	20.4	93.46	37.87	94.46	92.1	271.25	8.32	31.64	97.5	33.96	70.46	36.59	173.08	9.56	24.51	51.94	21.14
29.69	10.76	72.67	5.79	43.14	36.24	14.8	105.58	101.05	194.62	10.51	18.79	95.7	51.92	38.02	10.38	106.85	8.8	50.47	27.31	9.72	39.99	34.26	134.33	9.91	20.94	85.69	25.51
46.67	10.3	135.45	10.87	78.88	22.08	7.61	39.73	16.69	98.81	7.07	48.76	42.01	16.89	46.44	34.64	161.16	11.49	52.96	74.59	21.49	104.22	101.02	171.12	8.75	21.76	96.93	59.04
40.72	13.54	106	8.52	56.4	33.26	12.78	31.06	12.6	88.45	9.19	47.87	40.57	14.25	63.51	52.97	204.23	9.55	33.09	83.41	25.94	70.18	13.3	198.9	15.19	139.01	18.94	6.68
58.91	52.61	207.29	25.21	29.24	89.31	25.38	93.08	89.29	150.72	23.19	15.64	95.93	59.25	42.88	8.38	112.93	10.98	47.46	19.55	7.42	113.58	111.54	198.86	6.92	26.44	98.21	56.09
90.37	85.1	187.42	10.13	18.7	94.17	45.41	58.02	22.67	149	8.62	40.6	39.07	15.22	113.16	109.44	214.28	15.8	30.61	96.71	51.07	124.71	121.74	199.25	10.52	36.72	97.61	61.1
46.09	22.09	100.48	6.05	34.68	47.94	21.99	100.36	97.27	179.26	8.21	23.12	96.92	54.26	28.74	7.6	59.24	3.48	39.89	26.44	12.83	143.94	142.12	171.96	9.4	23.66	98.74	82.65
33.93	15.44	112.65	10.87	25.16	45.5	13.7	100.21	93.28	230.92	10.82	26.18	93.09	40.4	48.22	41.03	146.05	12.08	28.49	85.09	28.09	120.83	117.44	234.21	11.56	28.2	97.19	50.14
116.37	112.62	268.38	10.1	34.59	96.78	41.96	133.7	124.44	243.51	9.03	32.38	93.08	51.1	123.66	110.12	252.7	12.18	35.76	89.05	43.58	15.15	6.91	61.28	3.93	69.56	45.6	11.27
32.63	15.6	86.89	6.87	39.12	47.81	17.95	40.29	10.05	163.7	15.56	19.62	24.93	6.14	21.18	11.51	72.53	6.66	19.95	54.34	15.87	51.91	4.27	101.75	9.19	50.11	8.22	4.19
124.74	116.02	287.99	10.72	29.22	93.01	40.29	81.33	65.69	207.41	11.01	23.12	80.77	31.67	86.73	54.23	231.83	21.72	37.5	62.53	23.39	71.78	67.03	211.88	11.72	13.6	93.39	31.64
89.14	52.12	170.8	12.54	36.72	58.47	30.51	54.25	15.87	201.22	11.93	83.64	29.26	7.89	75.05	3.53	233.85	27.42	98.6	4.7	1.51	99.53	96.17	256.64	8.11	35.08	96.62	37.47
108.68	100.48	263.35	10.05	23.2	92.45	38.16	47.28	40.01	192	9.95	15.64	84.61	20.84	108.17	104.03	225.42	10.97	24.48	96.17	46.15	51.74	22.18	124.13	8.6	40.58	42.87	17.87
19.89	12.61	61.62	4.25	57.12	63.43	20.47	54.46	30.54	217.36	13.21	63.96	56.07	14.05	64.69	60.51	184.18	8.8	19.71	93.53	32.85	62.42	58.31	101.33	5.05	36.72	93.42	57.55
100.14	96.02	211.23	8.21	29.92	95.88	45.46	126.72	116.36	215.66	14.6	26.52	91.83	53.95	141.33	136.33	253.3	11.45	34.72	96.47	53.82	25.12	8.78	79.11	7.56	41.27	34.94	11.09
41.65	35.24	119.73	8.41	15.64	84.59	29.43	28.3	1.39	121.08	11.72	100.82	4.91	1.15	71.42	68.35	209.89	8.63	26.52	95.7	32.56	105.1	101.61	188.28	9.5	24.35	96.68	53.97
17.54	7.2	84.09	4.9	30.31	41.07	8.56	53.76	47.1	93.72	5.02	36.88	87.61	50.26	80.93	70.31	185.39	9.88	17.68	86.88	37.93	19.48	7.32	53.49	3.67	44.88	37.59	13.69
31.48	7.82	59.73	5.66	23.12	24.85	13.1	31.38	1.45	83.27	23.05	151.02	4.63	1.74	59.91	48.41	180.9	10.06	50.32	80.8	26.76	148.31	140.36	260.25	10.72	31.91	94.64	53.94
81.17	75.17	197.37	10.83	21.76	92.6	38.08	90.68	79.91	234.47	12.2	14.77	88.12	34.08	86.19	82.26	239.05	12	21.08	95.44	34.41	112.32	109.5	160.99	7.57	26.44	97.48	68.01
61.3	55.27	161.68	9.14	23.8	90.17	34.19	56.55	28.95	157.55	8.91	49.87	51.19	18.38	86.69	83.67	204.11	10.24	20.4	96.52	40.99	29.16	4.03	74.41	7	56.92	13.83	5.42
143.25	138.32	252.81	9.53	30.26	96.56	54.71	58.79	36.58	192.24	16.88	27.2	62.21	19.03	97.74	78.04	219.81	16.2	28.98	79.85	35.5	114.1	109.4	221.28	11.97	22.08	95.88	49.44
23.33	1.89	75.55	3.81	70.4	8.09	2.5	110.5	105.14	187.05	10.32	26.5	95.15	56.21	64.91	8.55	117.04	5.85	103.17	13.17	7.31	22.11	16.52	47.62	3.76	32.81	74.74	34.7
22.72	11.67	60.85	15.14	31.96	51.35	19.17	70.78	44.56	147.37	12.17	41.05	62.96	30.24	136.84	132.6	257.08	8.97	30.95	96.9	51.58	69.91	35.83	153.64	12.24	25.39	51.25	23.32
92.09	86.75	207.82	9.06	23.8	94.2	41.74	39.15	9.16	111.54	6.87	29.92	23.4	8.21	132.34	125.98	237.8	9.84	35.08	95.19	52.98	114.53	109.09	250.53	12.57	25.43	95.25	43.54
40.9	21.1	103.49	5.87	37.4	51.58	20.38	102.34	95.52	186.1	10.27	22.53	93.33	51.33	22.65	5.86	53.55	2.74	48.83	25.89	10.95	90.44	86.45	145.31	8.42	20.49	95.59	59.49
70.04	41.84	161.69	9.36	44.2	59.74	25.87	29.39	10.03	70.87	3.39	43.29	34.13	14.15	37.42	14.35	167.78	19.73	53.06	38.36	8.56	114.66	99.56	207.88	23.21	20.91	86.83	47.89
26.77	14.4	56.65	11.6	99.04	53.81	25.42	56.82	31.13	128.3	8.29	51.58	54.79	24.26	135.81	131.95	258.21	9.5	36.72	97.16	51.1	37.53	5.02	70.67	5.37	74.26	13.38	7.11
27.5	14.97	91.19	8.35	44.02	54.44	16.42	103.18	90.45	222.95	21.4	20.4	87.67	40.57	65.91	56.43	216.28	9.7	37.04	85.62	26.09	67.07	31.28	186.24	19.82	25.05	46.64	16.8
23.89	10.91	75.8	4.49	41.37	45.68	14.4	91.15	85.18	203.44	13.28	14.42	93.45	41.87	96.71	95.28	174.33	8.96	19.95	98.53	54.66	123.9	122.73	184.73	9.04	30.38	99.06	66.44
84	81.37	183.76	10.48	17	96.87	44.28	80.95	75.92	140.49	10.47	12.82	93.8	54.04	118.06	110.63	236.22	8.36	26.49	93.7	46.83	32.37	20.21	101.02	4.68	31.91	62.45	20.01
58.78	53.3	161.65	10.21	17	90.68	32.98	68.05	44.45	155.83	11.06	31.61	65.31	28.52	93.48	88.8	187.64	11.21	31.38	95	47.33	81.12	2.88	129.24	6.93	59.84	3.55	2.23
92.61	83.69	202.19	8.28	29.21	90.37	41.39	85.52	77.15	199.34	9.69	28.89	90.21	38.7	36.87	23.73	123.98	8.08	38.72	64.38	19.14	89.74	76.04	226.98	9.48	31.28	84.74	33.5
24.8	16.58	58.29	16.01	176.19	66.83	28.44	66.54	61.17	189.57	11.13	15.82	91.93	32.27	148.3	135.92	243.8	18.29	50.47	91.65	55.75	21.63	2.71	70.87	21.56	718.06	12.51	3.82
99.08	93.56	225.42	9.64	24.15	94.44	41.51	98.72	93.95	195.03	10.32	19.01	95.17	48.17	48.61	17.78	132.24	10.64	41.48	36.58	13.45	104.92	102.73	262.13	9.44	30.3	97.91	39.19
34.86	0.41	75	5.37	65.42	1.17	0.54	81.73	68.06	190.1	15.35	22.56	83.27	35.8	133.71	131.83	210.31	8.78	29.22	98.59	62.68	37.29	5.43	96.06	4.69	48.15	14.56	5.65
105.81	92.5	226.3	9.52	31.34	87.42	40.87	123.16	116.16	219.2	9.52	29.22	94.32	52.99	49.47	6.04	103.83	16.17	42.44	12.21	5.82	50.86	29.69	149.49	10.31	27.83	58.38	19.86
65.8	25.98	163.23	10.05	45.56	39.48	15.91	54.93	28.17	122.92	6.24	54.34	51.28	22.92	55.8	27.01	114.84	8.92	39.89	48.4	23.52	47.25	45.34	139.32	10.22	21.23	95.96	32.54
94.87	59.22	216.43	13.18	36.88	62.42	27.36	42.12	23.12	165.1	8.88	51	54.89	14	120.25	115.12	226.23	10.58	20.87	95.73	50.89	32.74	14.25	76.12	5.93	33.51	43.51	18.72
16.61	0.2	47.28	11.74	280.95	1.21	0.42	96.25	24.97	155.64	9.38	41.81	25.95	16.04	73.93	71.35	181	11.13	20.43	96.52	39.42	135.89	129.51	208.22	19.83	38.27	95.31	62.2
131.54	118.68	223.82	8.22	26.44	90.22	53.03	28.62	10.19	69.17	4.85	45.56	35.63	14.74	124.35	120.78	231.89	11.6	26.97	97.13	52.09	39.18	24.52	73.51	4.85	37.31	62.59	33.36
37.29	9.13	111.25	8.61	70.84	24.49	8.21	96.08	85.79	202.66	10.9	17	89.3	42.33	98.39	93.05	230.74	7.81	24.7	94.58	40.33	14.52	0.78	68.51	28.14	138.91	5.34	1.13
59.04	1.19	218.4	10.97	96.98	2.02	0.55	62.88	46.46	117.53	6.93	35.49	73.88	39.53	95.52	93.26	266.88	11.41	23.12	97.64	34.94	26.05	2.17	92.04	10.32	120.76	8.35	2.36
45.81	19.76	129.13	8.82	47.31	43.13	15.3	114.84	110.59	154.34	10.59	21.57	96.3	71.65	61.83	45.48	219.85	10.28	36.18	73.57	20.69	148.05	142.12	224.66	9	33.86	95.99	63.26
52.05	29.18	140	11.29	41.53	56.07	20.84	99.3	95.62	240.89	11.91	15.64	96.29	39.69	84.37	81.17	208.47	8.34	24.35	96.2	38.94	39	6.67	84.32	7.18	23.48	17.11	7.91
37.77	17.07	128.55	9.84	56.44	45.21	13.28	93.1	81.05	218.35	21.07	22.44	87.06	37.12	72.48	68.84	221.17	9.94	21.08	94.98	31.13	98.67	95.42	142.17	8.12	21.31	96.71	67.12
57.13	32.46	122.97	8.64	41.48	56.82	26.4	19.98	8.7	59.48	4.17	83.77	43.57	14.63	58.71	25.64	196.34	14.42	19.72	43.67	13.06	25.06	16.58	65.83	8.8	169.2	66.16	25.18
43.46	11.6	110.27	7.03	54.14	26.7	10.52	112.03	109.85	207.85	10.78	20.4	98.06	52.85	64.48	55.4	218.18	9.89	24.48	85.93	25.39	73.24	67.88	130.8	9.6	10.32	92.68	51.89
12.68	8.52	41.52	10.89	58.43	67.18	20.51	147.17	138.65	206.06	30.85	28.16	94.22	67.29	48.06	29.97	175.11	10.01	37.4	62.35	17.11	127.8	122.29	239.25	9.05	29.92	95.69	51.11
134.17	130.38	251.61	10.02	30.53	97.18	51.82	62.61	60.53	127.31	4.65	49.07	96.67	47.54	85.34	82.24	239.02	7.77	28.86	96.37	34.41	57.07	54.44	152.58	8.17	22.44	95.39	35.68
97.98	82.76	268.71	10.64	47.58	84.46	30.8	108.42	104.76	182.51	8.82	21.58	96.62	57.4	27.6	9.17	56.65	3.99	36.88	33.24	16.2	55.84	31.04	150.35	9.05	49.64	55.59	20.65
104.67	102.19	201.04	11.31	22.72	97.63	50.83	80.13	77.59	180.18	12.13	20.63	96.83	43.06	98.32	93.56	209	10.51	19.72	95.16	44.76	140.71	138.77	190.01	8.22	23.6	98.62	73.03
64.05	28.77	124.72	9.45	34.43	44.91	23.06	15.08	5.67	61.84	3.81	50.39	37.63	9.18	43.09	30.89	107.4	7.93	16.51	71.7	28.76	30.93	3.24	49.17	6.01	51.58	10.47	6.59
42.34	27.79	138.78	9.15	25.95	65.64	20.03	72.17	48.07	158.82	11.47	27.62	66.61	30.27	92.05	89.79	183.21	7.14	20.4	97.54	49.01	108.34	105.87	184.33	8.58	20.68	97.72	57.43
54.59	40.16	141.33	10.69	60.63	73.56	28.41	105.63	100.31	184.5	8.38	19.72	94.96	54.37	110.7	91.87	194.29	13.77	52.27	82.99	47.28	50.33	43.97	104.94	5.99	37.83	87.35	41.9
76.96	70.69	196.5	10.48	23.12	91.85	35.97	131.57	129.28	243.64	10.1	26.6	98.26	53.06	102.26	97.91	215.72	10.89	19.72	95.74	45.39	115.38	111.15	217.83	12.47	20.87	96.34	51.03
73.32	3.91	139.95	6.2	51.68	5.33	2.79	34.21	22.92	102.9	6.51	33.01	67	22.28	108.18	104.3	261.94	13.96	22.44	96.41	39.82	43.41	24.02	214.86	9.66	73.44	55.34	11.18
129.16	121.59	277.23	12.28	29.58	94.14	43.86	98.94	93.43	189.63	10.39	30.62	94.42	49.27	109.02	103.74	198.05	7.51	27.2	95.16	52.38	16.33	7.97	63.47	5.39	17.1	48.81	12.56
38.16	7.86	77.78	6.5	50.9	20.61	10.11	104.35	100.19	190.96	11.83	19.95	96.01	52.46	123.93	119.67	231	8.18	25.45	96.56	51.81	39.78	3.38	116.72	11.67	47.31	8.49	2.89
41.59	26.45	116.7	8.14	37.14	63.59	22.66	101.2	90.85	209.8	17.57	24.76	89.77	43.3	26.3	6.68	97.76	7.76	64.71	25.4	6.83	48.74	23.69	120.87	8.91	42.11	48.61	19.6
72.25	47.65	211.6	11.22	39.89	65.95	22.52	121.2	115.95	202.16	9.4	28.4	95.66	57.36	34.36	16.19	73.55	6.78	57.12	47.11	22.01	32.37	12.96	101.31	9.81	22.29	40.04	12.79
97.03	89.69	261.04	6.97	31.85	92.44	34.36	93.21	75.63	202.74	22.61	22.27	81.15	37.31	117.76	113.59	237.39	9.76	33.4	96.46	47.85	122.94	118.42	208.85	21.26	29.47	96.32	56.7
34.75	11.2	155.31	11.28	93.16	32.24	7.21	36.04	12.46	89.46	8.59	16.32	34.58	13.93	139.87	135.98	278.25	9.23	34.39	97.22	48.87	45.41	4.24	62.35	5.13	39.89	9.34	6.8
36.75	11.79	78.04	10.22	52.36	32.08	15.11	41.82	4.84	81.96	16.94	125.87	11.58	5.91	122.91	118.05	268.8	8.33	29.24	96.04	43.92	15.98	12.21	47.07	3.45	50.1	76.43	25.95
65.25	46.82	141.8	9.94	23.94	71.75	33.02	65.33	63.06	193.37	9.49	14.28	96.52	32.61	79.95	70.48	205.54	11.15	25.84	88.15	34.29	42.21	2.34	84.2	6.24	81	5.55	2.78
70.55	50.35	166.91	12.07	13.6	71.37	30.16	123.16	119.37	192.67	9.58	26.82	96.92	61.96	72.02	53.59	196.61	9.62	33.09	74.41	27.26	55.46	43.52	130.06	10.95	15.86	78.48	33.46
30.76	22.92	126.82	9.62	14.96	74.51	18.07	94.92	90.63	212.26	10.83	23.8	95.48	42.7	40.53	6.79	78.94	10.37	42.96	16.75	8.6	136.61	133.15	226.44	13.53	30.28	97.47	58.8
42.46	19.58	109.32	8.77	25.05	46.11	17.91	133.59	126.91	246.92	10.09	28.89	95	51.4	105.99	100.64	256.84	8.26	27.43	94.95	39.18	65.49	58.98	159.95	7.87	52.96	90.06	36.87
92.62	82.34	206.47	13.25	19.04	88.9	39.88	21.41	10.07	66.33	6.08	30.51	47.06	15.19	142.07	137.94	249.35	16.66	29.22	97.09	55.32	50.76	41.29	101.26	6.25	52.27	81.34	40.78
106.43	102.22	207.23	9.92	21.91	96.04	49.32	44.37	10.8	109.7	7.15	54.5	24.33	9.84	141.76	132.77	249.65	11.58	33.32	93.66	53.18	87.95	84.51	197.35	8.69	28.56	96.1	42.82
62.54	53.8	221.67	10.04	25.84	86.02	24.27	69.89	22.24	172.65	9.91	36.18	31.83	12.88	61.98	19.05	106.27	16.72	51	30.73	17.92	53.64	18.07	211.67	14.13	77.52	33.68	8.53
121.26	114.85	257.9	9.52	24.64	94.71	44.53	123.11	115.8	249.92	9.38	27.83	94.06	46.33	93.5	65.26	187.16	10.14	27.46	69.8	34.87	79.9	68.18	235.04	13.97	24.76	85.33	29.01
48.26	7.83	102.97	14.18	67.56	16.23	7.61	90.04	79.38	222.11	15.6	20.63	88.15	35.74	82.43	62.53	219.99	19.41	22.44	75.86	28.43	48.73	12.63	103.33	6.76	53.47	25.92	12.22
34.79	9.66	96.01	9.25	21.54	27.76	10.06	34.33	4.68	69.57	4.44	74.28	13.63	6.72	71.61	57.48	165.37	8.89	24.35	80.27	34.76	71.38	19.69	102.98	6.61	31.42	27.58	19.12
23.78	6.44	80.99	5.08	50.75	27.09	7.95	74.82	67.17	215.16	11.28	22.88	89.77	31.22	38.43	15.6	95.2	6.22	39.44	40.59	16.39	20.27	10.98	71.72	7.55	35.36	54.15	15.3
53.96	45.8	193.95	10.37	46.92	84.89	23.62	117.61	110.76	195.94	8.87	22.96	94.18	56.53	49.84	10.93	104.27	7.88	41.27	21.94	10.49	47.58	9.9	102.13	8.11	52.96	20.81	9.7
107.81	73.3	223.77	10.75	35.08	67.99	32.76	32.74	24.18	83.85	12.82	36.72	73.86	28.83	88.12	61.74	153.46	19.42	44.69	70.06	40.23	31.91	3.92	66.07	8.4	53.46	12.27	5.93
79.41	62.37	129.32	6.55	27.4	78.55	48.23	67.92	61.24	123.75	5.17	50.21	90.16	49.48	60.21	39.26	194.6	10.25	59.84	65.2	20.17	125.7	106.2	227.11	24.78	40.12	84.49	46.76
68.94	55.59	191.68	9.19	38.96	80.63	29	56.15	18.52	119.44	12.03	50.63	32.99	15.51	88.76	84.08	218.92	8.79	21.63	94.73	38.41	105.58	99.16	186.5	9	19.72	93.92	53.17
22.4	4.61	50.87	4.22	89.08	20.6	9.07	21.3	17.27	52.3	3.72	53.73	81.05	33.01	29.34	5.29	91.84	7.19	24.22	18.05	5.76	35.42	24.55	78.3	15.12	166.22	69.32	31.36
88.5	19.73	205.43	10.62	47.56	22.3	9.61	130.17	121.68	187.58	16.17	29.92	93.48	64.87	40.57	10.12	83.95	10.74	25.16	24.94	12.06	50.92	47.83	87.67	4.2	48.28	93.94	54.56
33.28	0	130.89	12.05	186.99	0	0	83.32	74.83	120.1	3.85	43.52	89.82	62.31	53.27	45.89	94.67	5.61	47.6	86.14	48.47	48.32	36.86	154.27	9.75	14.59	76.28	23.89
57.84	28.41	153.59	13.31	19.47	49.11	18.49	78.94	73.84	216.95	9.4	25.45	93.54	34.04	18.87	7.09	75.92	5.46	36.72	37.6	9.34	116.97	112.98	195.11	10.52	23.8	96.59	57.9
39.56	2.86	96.12	15.96	73.37	7.22	2.97	123.08	116.03	228.53	8.96	28.2	94.27	50.77	138.08	134.18	251.65	9.63	32.64	97.18	53.32	113.44	110.79	206.79	10.72	25.45	97.67	53.58
67.58	8.66	222.92	19.36	68	12.81	3.88	94.03	89.06	189.16	10.32	21.57	94.71	47.08	92.69	88.88	234.03	10.91	33.09	95.9	37.98	54.78	50.57	83.77	5.35	17	92.32	60.36
19.91	10.06	58.24	7.1	40.83	50.49	17.27	105.16	34.89	204.7	20.27	35.36	33.18	17.05	63.5	41.48	157.68	9.5	24.35	65.32	26.3	53.46	25.21	115.85	7.15	41.27	47.15	21.76
37.01	8.62	71.63	6	41.27	23.29	12.03	91.58	89.44	182.39	10.29	17.68	97.67	49.04	66.56	62.78	122.5	7.08	45.92	94.32	51.25	57.16	48.67	131.94	6.65	52.18	85.15	36.89
118.64	107.36	262.39	25.58	29.55	90.49	40.92	22.88	11.97	63.67	5.1	21.21	52.31	18.79	24.73	9.93	47.06	2.78	35.49	40.17	21.11	126.63	118.17	180.06	21.34	30.98	93.32	65.63
72.41	70.2	238.01	9.49	17	96.95	29.5	55.31	22.17	121.23	8.13	34	40.08	18.29	115.96	63.07	222.68	11.95	27.88	54.39	28.32	112.26	106.51	186.32	9.05	21.76	94.88	57.17
27.59	9.77	161.39	7.84	119	35.42	6.06	91.01	90.05	152.09	9.08	28.2	98.95	59.21	69.28	61.96	205.6	14.71	27.88	89.44	30.14	76.61	48.96	168.67	7.02	35.9	63.91	29.03
70.32	45.67	214.49	18.91	34.79	64.95	21.29	63.43	8.33	115	5.43	68.78	13.13	7.24	90.09	38.01	217.38	14.96	39.2	42.19	17.49	29.1	5.01	57.86	3.44	41.75	17.22	8.66
44.06	4.12	101.54	8.04	99.97	9.35	4.06	95.59	92.63	168.9	10.63	17.88	96.9	54.84	79.67	70.05	218.16	9.63	33.01	87.92	32.11	45.08	7.46	99.7	6.95	85.68	16.55	7.48
46.84	21.1	154.54	10.76	29.92	45.04	13.65	97.92	94.96	171.87	8.62	20.87	96.98	55.25	44.17	18.81	94.8	5.31	46.08	42.58	19.84	61.87	24.56	200.55	12.22	37.14	39.7	12.25
92.59	77.4	204.11	11.47	35.77	83.6	37.92	50.16	46.28	129.29	8.86	25.45	92.28	35.8	72.32	69.29	207.9	10.88	19.26	95.8	33.33	126.43	124.58	193.81	8.52	30.26	98.54	64.28
48.67	18.1	182.73	12.89	67.32	37.19	9.91	97.88	94.92	148.17	9.49	16.51	96.97	64.06	54.95	52.77	100.26	5.14	47.46	96.04	52.64	57.42	46.37	142.36	6.92	45.23	80.76	32.57
44.64	26.34	115.86	7.81	46.77	59	22.73	103.05	95.87	207.69	9.89	28.53	93.03	46.16	70.77	62.73	222.03	11.7	24.48	88.64	28.25	53.03	35.15	135.31	10.21	48.28	66.27	25.98
56.86	24.53	132.56	8.8	50.32	43.14	18.5	88.72	83.59	209.73	9.71	28.53	94.22	39.86	127.38	123.55	249.9	8.96	35.77	96.99	49.44	105.22	98.57	200.95	10.27	17.6	93.69	49.05
57.14	11.62	107.23	6.44	40.43	20.33	10.83	27.78	10.09	88.55	7.71	49.28	36.31	11.39	69.76	38.68	197.15	12.62	46.24	55.44	19.62	103.69	101.34	194.56	8.47	23.94	97.73	52.09
80.23	68.72	223.44	13.75	33.32	85.66	30.76	132.09	130.11	232.17	11.29	28.86	98.5	56.04	24.62	12.47	83.43	4.62	62.56	50.67	14.95	127.74	124.25	162.42	7.91	26.75	97.27	76.5
92.75	86.21	187.4	8.1	21.08	92.95	46.01	95.34	86.99	169.98	10.4	15.51	91.25	51.18	107.52	101.15	206.92	9.6	27.2	94.08	48.88	53.71	16.96	136.92	20.81	35.36	31.57	12.39
155.45	149.16	267.79	8.85	37.4	95.96	55.7	8.23	2.8	39.86	2.25	109.07	33.97	7.01	92.53	86.22	224.45	11.66	22.53	93.18	38.41	38.18	21.21	98.35	10.16	41.96	55.54	21.56
135.12	132.28	235.99	8.21	32.01	97.9	56.05	59.82	54.5	145.95	11.65	10.32	91.1	37.34	43.04	16.09	195.56	11.06	73.44	37.39	8.23	109.05	100.04	183.07	22.73	23.12	91.74	54.64
78.23	73.85	252.17	10.57	29.22	94.4	29.28	51.52	37.25	123.83	16.05	32.44	72.3	30.08	36.96	7.96	79.87	10.06	23.19	21.53	9.97	100.17	97.73	178.4	15.02	25.05	97.56	54.78
37.1	12.31	87.11	6.5	49.87	33.17	14.13	59.25	11.06	95.11	26.88	221.75	18.66	11.62	95.42	88.38	249.38	10.65	20.42	92.62	35.44	39.03	15.54	117.09	6.29	55.71	39.83	13.28
107.85	101.86	268.82	11.67	23.12	94.45	37.89	48.86	31.64	123.02	8.23	28.49	64.75	25.72	116.32	113.95	227.34	14.6	38.27	97.96	50.12	65.94	15.94	174.32	13.69	24.15	24.17	9.14
46.87	10.54	140.34	25.83	60.71	22.49	7.51	28.85	5.01	73.98	7.5	23.35	17.36	6.77	105.18	102.21	193.01	9.64	23.23	97.17	52.96	30.28	12.47	86.26	7.57	41.75	41.19	14.46
72.04	43.39	193.83	12.57	33.4	60.24	22.39	79.59	71.74	141.81	9.95	38.96	90.14	50.59	94.75	57.55	118.08	4.1	36.88	60.74	48.74	74.81	65.56	204.74	10.45	31.68	87.64	32.02
56.29	9.09	126.94	5.73	38.19	16.16	7.16	85.26	43.28	192.19	20.24	19.72	50.76	22.52	46.83	35.01	168.26	12.84	30.6	74.76	20.81	124.77	117.69	281.3	16.37	26.93	94.32	41.84
29.45	5.38	44.75	3.33	38.08	18.25	12.01	28.57	3.08	54.24	6.87	48.15	10.77	5.67	69.02	0.62	195.09	17.09	194.65	0.9	0.32	35.91	4.76	135.32	7.38	128.96	13.25	3.52
73.84	28.76	224.26	15.46	51.39	38.95	12.83	42.25	18.23	99.81	19.14	60.53	43.14	18.26	162.92	157.88	260.94	13.59	42.44	96.91	60.5	17.59	13.33	30.42	15.63	359.03	75.74	43.8
75.13	33.3	139.22	12.11	39.89	44.32	23.92	24.65	23.47	49.31	2.69	32.64	95.2	47.6	63.77	53.55	105.56	5.15	38.76	83.97	50.72	93.99	88.05	208.8	8.18	26.14	93.68	42.17
79.42	50.54	194.19	9.93	26.14	63.63	26.02	61.47	52.82	176.58	10.73	16	85.93	29.91	84.52	78.83	223.03	10.5	31.64	93.26	35.34	113.49	110.77	179.37	11.59	25.16	97.6	61.75
48.68	16.8	112.74	9.91	59.84	34.51	14.9	98.77	90.56	224.28	15.74	24.76	91.69	40.38	129.55	127.06	247.43	8.84	37.4	98.07	51.35	104.25	99.75	274.47	8.96	33.01	95.68	36.34
71	58.45	208.47	9.04	52.27	82.32	28.04	131.5	126.06	196.67	9.55	26.05	95.86	64.09	92.99	90.27	209.39	10.74	20.32	97.08	43.11	47.21	36.05	87.31	6.44	38.76	76.36	41.29
47.69	10.54	130.36	9.95	90.79	22.1	8.08	36.56	8.89	61.99	4.9	25.95	24.32	14.34	137.9	128.8	238.69	8.94	28.56	93.4	53.96	72.75	30.47	163.12	17.84	21.45	41.89	18.68
70.85	65.15	206.01	9.36	30.95	91.95	31.62	55.01	11.71	115.63	10.41	54.34	21.28	10.12	104.95	102.04	215	11.72	19.72	97.23	47.46	97.35	95.46	167.41	7.31	36.04	98.06	57.02
50.29	8.4	88.18	8.34	68.68	16.69	9.52	103.45	94.17	157.06	17.01	41.09	91.03	59.96	119.7	114.85	212.33	6.89	34.56	95.95	54.09	50.28	12.7	127.13	11.62	56	25.25	9.99
75.95	66.57	204.75	9.36	31.34	87.65	32.51	103.59	100.32	192.95	12.91	19.48	96.85	51.99	72.98	3.29	133	7.95	49.87	4.51	2.48	105.9	104.03	184.41	9.25	34	98.24	56.41
49.7	24.8	131.48	8.93	47.31	49.89	18.86	111.27	108.42	189.31	8.99	26.75	97.44	57.27	157.97	143.33	234.89	17.41	29.58	90.73	61.02	122.51	116.17	232.87	10.47	32.91	94.82	49.89
67.6	64.11	163.9	8.34	20.4	94.83	39.11	113.35	111.03	174.11	10.67	27.2	97.96	63.77	60.94	54.4	128.76	8.36	39.57	89.27	42.25	25.13	8.3	95.21	15.83	184.27	33.01	8.71
82.74	71.67	215.63	8.83	23.8	86.63	33.24	89.49	83.27	218.92	13.04	31.28	93.05	38.04	36.56	9.93	99.41	7.04	44.71	27.18	9.99	78.08	75.27	142.72	11.14	15.82	96.41	52.74
42.09	20.86	101.85	7.77	26.52	49.56	20.48	107.57	102.69	183.58	9.59	26.14	95.46	55.94	133.56	125.98	212.64	11.24	23.12	94.32	59.25	54.95	33.89	145.34	7.69	32.33	61.69	23.32
69.92	48.97	153.76	9.32	27.2	70.04	31.85	32.36	1.03	81.4	11.58	187.77	3.18	1.27	46.61	22.22	113.66	7.23	24.48	47.67	19.55	123.78	117.75	153.17	9.08	26.05	95.13	76.88
35.57	2.95	64.29	13.77	100.19	8.3	4.59	90.39	80.76	201.41	12.53	19.95	89.35	40.1	132	126.42	222.48	8.7	30.27	95.78	56.82	13.65	5.17	44.37	3.49	50.79	37.87	11.65
18.23	6.13	65.9	6.46	163.13	33.64	9.3	105.09	98.78	215.44	9.4	23.6	94	45.85	72.31	62.38	134.28	12.12	35.77	86.27	46.45	99.04	96.12	140.12	4.45	41.27	97.05	68.6
96.09	86.75	218.49	10.72	33.4	90.27	39.7	33.37	7.66	83.72	7.67	39.66	22.95	9.15	97.49	90.2	197.02	8.4	22.08	92.52	45.78	136.66	134.69	184.68	10.5	31.31	98.55	72.93
35.19	19.81	65.3	4.61	33.01	56.29	30.33	29.53	25.25	81.47	6.51	43.45	85.51	30.99	104.47	100.47	227.98	10.85	22.27	96.17	44.07	50.04	32.42	125.97	17.03	64.77	64.79	25.73
106.08	102.35	235.2	9.66	29.22	96.49	43.52	58.3	23.29	104.42	7.43	47.46	39.94	22.3	16.78	5.71	42.35	3.45	66.88	34.03	13.48	109.55	102.84	163.2	10.02	24.07	93.88	63.01
99.28	96.87	216.51	9.78	23.23	97.57	44.74	35.37	20.53	104.19	7.94	27.2	58.05	19.7	148.69	142.12	307.55	10.62	32.33	95.58	46.21	120.34	100.41	154.42	14.29	20.71	83.44	65.02
95.1	92.41	195.67	9.21	23.94	97.17	47.23	31.65	8.98	76.89	4.86	32.64	28.38	11.68	93.6	89.41	243.74	10.65	22.44	95.52	36.68	32.06	13.33	64.46	19.54	1518.39	41.59	20.68
86.35	52.66	209.05	8.38	46.24	60.98	25.19	52.3	20.07	185.08	13.61	19.48	38.37	10.84	48.56	29.48	120.84	12.85	15.64	60.69	24.39	65.16	1.27	202.27	21.49	151.36	1.96	0.63
117.07	110.47	217.47	10.17	27.14	94.36	50.8	124.53	119.4	199.42	11.9	31.08	95.88	59.87	73.87	51.48	209.9	14.92	44.88	69.69	24.52	141.9	140.27	195.35	9.62	26.42	98.85	71.8
85.33	45.43	180.86	12.01	34.68	53.24	25.12	23.02	10.35	97.04	8.45	53.7	44.99	10.67	98.31	87.65	180.75	8.05	22.53	89.16	48.49	141.72	137.61	204.55	15.44	32.06	97.1	67.28
68.89	51.13	152.82	10.09	35.36	74.22	33.46	141.26	133.41	178.47	7.25	27.83	94.45	74.75	37.82	13.33	92.38	9.36	11.08	35.26	14.43	84.31	78.01	122.38	4.26	44.71	92.53	63.75
81.54	74.67	214	9.96	28.2	91.58	34.89	26.67	0	60.38	15.2	557.8	0	0	107.93	103.65	273.14	9.15	33.01	96.04	37.95	21.89	9.15	73.67	5.03	21.76	41.78	12.41
61.33	40.54	180.32	10.3	23.12	66.09	22.48	55.97	36.82	156.51	11.1	23.12	65.79	23.53	30.79	7.27	109.36	9.39	70.28	23.63	6.65	35.09	7.35	100.26	7.71	49.02	20.96	7.34
98.18	88.19	217.78	10.17	31.64	89.83	40.5	112.33	108.34	250.72	10.83	29.57	96.45	43.21	104.99	98.95	241.78	13.93	27.33	94.25	40.93	70.97	42.25	159.66	17.9	37.61	59.53	26.46
117.06	112.62	217.24	8.34	21.76	96.2	51.84	66.19	60.28	105.25	5.56	19.95	91.07	57.28	122.69	115.04	264.12	8.98	28.89	93.76	43.56	80.58	75.6	121.35	6.46	46.24	93.83	62.3
41.47	18.54	123.65	11.54	59.16	44.7	14.99	24.14	10.76	58.92	4.54	64.56	44.56	18.26	51.31	43.12	229.74	8.53	38.72	84.03	18.77	27.67	10.54	89.41	5.29	46.77	38.08	11.78
59.68	13.99	102.45	15.58	56.36	23.44	13.65	21.45	10.71	67.99	8	41.48	49.92	15.75	104.46	98.64	157.01	7.61	17.68	94.43	62.82	120.49	114.91	208.54	9.46	25.05	95.37	55.1
47.99	0.42	110.48	17.8	62.23	0.87	0.38	93.82	90.18	201.64	11.95	19.72	96.11	44.72	105.36	96.55	250.19	12.3	21.32	91.63	38.59	116.6	113.41	189.44	9.65	26.14	97.27	59.87
68.81	17.27	192.99	9.97	55.71	25.1	8.95	70.35	66.85	177.85	11.1	19.3	95.03	37.59	59.63	52.06	104.11	6.13	51.19	87.31	50.01	30.01	12.07	77.34	4.88	51	40.21	15.6
39.42	21.66	134.51	8.5	40.8	54.95	16.11	127.57	124.18	170.87	9.31	24.64	97.34	72.68	93.07	90.95	189.77	11.69	23.12	97.72	47.93	91.52	46.36	144.64	18.2	34.09	50.65	32.05
44.09	9.03	87.97	6.31	31.31	20.49	10.27	22.6	3.55	123.05	14.53	118.57	15.72	2.89	85.97	79.47	213.73	11.27	16.32	92.44	37.18	109.49	108.11	144	9.5	27.14	98.74	75.07
98.24	86.76	209.26	9.83	19.7	88.31	41.46	122.4	114.62	185.28	8.76	24.68	93.64	61.86	88.82	80.12	257.92	10.1	40.8	90.2	31.06	19.71	9.06	68.37	7.4	74.52	45.98	13.25
76.28	52.94	228.09	9.36	59.15	69.41	23.21	52.43	50.01	136.02	11.46	14.59	95.38	36.77	68.5	65.44	195.41	10.37	39.66	95.52	33.49	152.78	149.23	198.55	8.83	31.91	97.68	75.16
116.26	110.09	215.47	10.3	22.44	94.7	51.1	30.97	0	111.66	18.9	276.29	0	0	76.85	70.52	101.59	3.91	41.96	91.76	69.41	114.86	111.92	172.86	8.3	30.6	97.45	64.75
60.05	40.08	211.04	10.37	46.24	66.75	18.99	113.2	109.39	236.04	9.81	28.16	96.64	46.35	37.81	9.95	77.92	4.5	42.03	26.33	12.77	82.92	55.27	162.08	5.96	44.02	66.65	34.1
56.06	15.3	114.37	6.57	19.1	27.3	13.38	58.72	2.38	134.36	17.6	53.58	4.06	1.77	89.89	83.45	220.23	14.35	23.79	92.83	37.89	124.84	122.02	179.99	10.12	34.09	97.74	67.79
81.32	64.5	218.85	12	30.95	79.32	29.47	99.89	95.26	174.5	11.27	20.63	95.37	54.59	41.43	23.81	111.78	9.45	19.72	57.47	21.3	121.6	117.62	216.89	9.54	23.8	96.73	54.23
111.41	100.89	264.5	11.1	34.09	90.55	38.14	74.86	66.21	187.49	10.78	27.2	88.44	35.31	38.14	31.59	66.07	3.39	31.96	82.82	47.82	134.51	132.43	179.23	28.2	24.07	98.45	73.89
16.33	7.49	58.25	5.2	48.01	45.83	12.85	36.74	4.86	80.04	4.88	65.96	13.22	6.07	95.77	91.62	263.7	8.6	31.31	95.66	34.74	88.43	57.17	230.37	16.26	52.96	64.65	24.82
58.03	53.64	186.85	11.74	20.4	92.44	28.71	45.3	30.31	122.89	7.29	44.71	66.91	24.66	116.33	110.41	181.86	7.85	31.34	94.91	60.71	87.3	83.03	215.61	9.04	27.14	95.11	38.51
80.95	79.43	165.83	9.12	18.79	98.12	47.9	40.62	18.38	88.71	6.33	43.65	45.23	20.71	75.41	71.94	118.79	5.57	50.1	95.41	60.57	75.73	61.45	146.06	5.74	45.92	81.13	42.07
65.03	59.14	227.72	10.85	19.19	90.93	25.97	38.46	25.01	106.47	9.95	49.52	65.04	23.49	49.46	19.63	145.18	18.16	45.23	39.68	13.52	66.75	58.67	94.49	3.84	39.2	87.89	62.09
77.35	74.19	163.09	10.08	16.98	95.92	45.49	88.28	79.28	224.15	12.57	17	89.8	35.37	57.25	54.28	115.72	7.7	33.32	94.82	46.91	55.42	19.18	93.93	22.2	556.37	34.61	20.42
117.21	107.9	215.12	9.02	22.96	92.06	50.16	120.2	116.63	186.36	10.12	26.75	97.03	62.58	51.03	22.24	128.56	13.6	46.77	43.58	17.3	100.94	95.84	273.15	9.13	23.01	94.95	35.09
88.53	76.35	259.65	12.22	29.92	86.24	29.4	107.45	100.88	158.21	9.45	19.95	93.89	63.76	49.52	8.07	95.71	5.8	41.05	16.29	8.43	25.41	8.4	76.99	7.87	31.28	33.04	10.91
94.04	50.03	195.27	16.84	49.52	53.2	25.62	90.22	87.4	171.29	12.09	22.44	96.88	51.03	21.03	6.85	49.96	4.51	80.02	32.56	13.71	108.55	104.86	250.21	8.63	27.14	96.6	41.91
92.05	72.51	226.76	18.65	23.51	78.77	31.98	26.19	14.25	69.94	4.77	29.92	54.41	20.38	80.64	69.31	232.03	8.86	19.04	85.96	29.87	32.58	18.29	95.27	11.04	15.64	56.13	19.19
92.05	84.05	180.57	10.63	19.72	91.31	46.55	87.17	82.46	132.09	7.97	16.38	94.59	62.42	34.94	33.66	70.34	3.15	41.27	96.32	47.85	79.77	77.48	135.01	12.1	35.9	97.13	57.39
51.73	0.24	102.85	12.13	132.75	0.46	0.23	130.78	107.31	230.98	19.59	24.1	82.05	46.46	92.69	88.57	212.86	10.18	15.64	95.55	41.61	37.68	18.63	129.62	10.67	29.92	49.43	14.37
80.75	71.28	204.02	9.63	21.63	88.28	34.94	74.23	48.09	214.94	10.57	32.5	64.78	22.37	58.82	52.2	191.54	10.76	19.95	88.75	27.25	81.85	78.98	207.32	14.11	19.72	96.49	38.09
110.25	107.8	263.61	11.06	26.68	97.78	40.89	47.63	0.71	127.93	16.53	74.17	1.49	0.56	104.8	99.53	226.81	11.97	29.57	94.97	43.88	64.09	13.81	119.98	11.76	69.69	21.55	11.51
43.24	5.91	87.18	14.1	84.91	13.67	6.78	93.14	91.77	132.28	8	22.53	98.53	69.37	133.41	127.53	210.74	14.8	28.2	95.59	60.51	88.55	75.85	266.05	8.64	20.81	85.66	28.51
5.86	3.14	21.76	1.87	107.4	53.63	14.43	47.39	37.47	79.83	3.48	37.68	79.06	46.94	41.65	3.07	121.17	11.19	83.77	7.36	2.53	71.4	50.18	208.02	12.33	50.58	70.27	24.12
49.23	7.65	133.72	16.58	46.08	15.55	5.72	124.98	120.41	183.16	7.94	27.51	96.34	65.74	146.27	141.12	267.23	8.53	38.27	96.49	52.81	84.25	81.69	250.54	10.58	23.12	96.95	32.6
87.74	82.92	153.57	10.88	15.82	94.51	54	57.18	52.05	113.22	6.7	42.16	91.04	45.97	111.2	109.68	227.33	10.35	36.88	98.64	48.25	38.23	15.78	124.72	9.26	56.19	41.28	12.65
133.05	127.53	210.72	9.38	30.6	95.85	60.52	121.31	119.39	158.42	6.3	25.34	98.42	75.36	96.09	40.97	279.06	13.63	36.72	42.64	14.68	34.25	12.29	90.46	7.08	59.84	35.87	13.58
40.05	8.59	111.28	11.73	56.4	21.44	7.72	120.57	117.2	200.93	11.83	26.36	97.2	58.33	24.93	7.12	95.91	9.17	66.78	28.54	7.42	67.99	46.24	119.19	5.57	40.8	68.01	38.79
55.16	13.09	110.18	7.11	50.9	23.73	11.88	11.42	5.26	39.26	3.17	61.37	46.07	13.41	35.1	12.23	95.92	12.17	151.32	34.83	12.75	65.68	61.08	189.75	8.55	25.02	93	32.19
87.04	65.99	202.09	18.05	22.96	75.82	32.65	131.73	128.07	236.71	10.27	34	97.23	54.11	33.53	24.43	165.37	9.86	31.12	72.86	14.77	96.37	72.83	171.35	12.66	38.89	75.57	42.51
68.38	58.67	200.62	10.7	25.16	85.8	29.24	71.52	63.39	197.09	9.78	29.24	88.63	32.16	140.26	134.25	246.74	8.99	27.54	95.71	54.41	102.11	98.66	204.39	8.87	21.12	96.62	48.27
27.89	11.93	72.79	6.03	21.48	42.76	16.38	29.34	4.5	75.68	6.83	29.24	15.33	5.94	71.99	66.35	124.41	14.88	37.83	92.17	53.33	48.76	39.1	153.28	11.41	15.13	80.18	25.51
56.2	1.94	216.81	27.31	72.4	3.46	0.9	46.88	10.05	88.84	5.12	52.08	21.44	11.31	35.92	31.87	70.19	3.62	34.68	88.74	45.41	40.81	5.74	92.68	6.05	41.53	14.07	6.2
119.74	116.87	178.61	14.48	27.1	97.6	65.44	77.15	39.6	136.69	6.85	41.48	51.33	28.97	69.06	15.04	169.02	16.72	33.4	21.77	8.9	102.99	101.22	294.85	8.25	29.58	98.28	34.33
49.36	41.45	111.3	7.52	39.44	83.97	37.24	111.63	108.62	163.97	9.34	26.82	97.31	66.25	110.64	106.38	210.65	7.72	33.32	96.15	50.5	143.76	137.53	240.5	13.19	26.52	95.66	57.18
30.49	14.12	66.54	5.21	48.15	46.32	21.22	101.23	96	196.34	11.95	21.32	94.83	48.9	35.85	19.89	120.98	9.9	20.4	55.49	16.44	98.22	94.22	219.78	9.6	23.23	95.92	42.87
30.2	16.02	123.13	9.14	21.82	53.03	13.01	91.36	87.6	196.37	13.05	19.72	95.89	44.61	109.61	107.06	203.14	9.05	26.18	97.68	52.7	137.71	130.96	250.59	10.5	37.83	95.1	52.26
107.08	100.99	224.08	10.71	24.35	94.32	45.07	25.02	0.48	84.27	18.71	221.14	1.93	0.57	104.66	34.92	241.53	15.79	36.88	33.37	14.46	115.05	112.39	234.21	8.39	31.31	97.69	47.99
58.71	18.4	161.92	14.01	48.83	31.35	11.37	43.63	25.68	140.22	10.85	24.48	58.86	18.32	51.99	29.05	171.22	10.33	41.89	55.87	16.97	100.16	93.53	211.86	9.2	23.8	93.38	44.15
65.67	37.13	118.13	6.84	36.18	56.54	31.43	28.41	9.3	71.32	6.53	13.16	32.75	13.05	38.66	8.28	178.53	23.99	176.45	21.43	4.64	113.35	108.06	174.18	8.68	23.23	95.33	62.04
40.92	27.46	173.01	11.39	50.21	67.1	15.87	26.91	13.67	70.8	9.79	9.52	50.78	19.3	29.25	12.09	76.61	10.62	35.49	41.35	15.79	84.62	11.88	168.46	9.33	38.16	14.04	7.05
88.69	85.28	189.17	11	17.68	96.15	45.08	110.65	105.05	210.87	9.21	22.7	94.94	49.82	80.24	74.7	209.03	11.55	16.32	93.09	35.73	38.17	11.21	81.19	5.03	76.22	29.38	13.81
65.04	60.76	180.63	10.59	21.76	93.43	33.64	43.7	14.41	92.93	13.17	43.52	32.97	15.51	83.19	69.79	155.75	7.96	36.72	83.89	44.81	129.18	127.09	235.25	13.61	32.44	98.38	54.02
30	27.92	70.93	3.54	34.09	93.05	39.36	84.57	72.93	216.87	10.18	25.81	86.24	33.63	24.4	6.42	62.68	4.98	74.09	26.3	10.23	113.89	111.76	170.91	10.86	27.78	98.13	65.39
116.25	113.28	236.29	12.93	27.88	97.44	47.94	45.11	21.53	125.89	9.31	23.73	47.73	17.1	148.19	139.39	255.33	10.39	32.33	94.06	54.59	90.51	86.83	200.34	9.74	21.76	95.94	43.34
78.88	74.81	154.27	10.28	13.22	94.84	48.49	37.74	11.65	46.77	14.5	756.82	30.87	24.91	119.93	117.35	209.6	9.01	35.2	97.85	55.99	42.28	38.27	126.08	10.45	16.7	90.53	30.36
27.9	10.82	69.7	5.04	74.12	38.79	15.53	53.77	34.04	74.98	8.14	31.12	63.3	45.39	83.77	75.97	111.47	4.26	51.94	90.69	68.15	129.49	125.79	277.13	13.47	32.7	97.14	45.39
29.42	8.18	65.08	5.71	56.44	27.81	12.57	61.4	44.82	181.06	9.5	32.29	72.99	24.75	66.91	60.52	194.68	11.69	18.79	90.45	31.09	38.26	12.47	92.63	5.68	30.95	32.59	13.46
21.22	10.41	46.81	4.33	28.56	49.06	22.24	51.75	45.08	160.18	12.76	15.67	87.13	28.15	53.49	43.75	206.11	9.35	19.04	81.8	21.23	20.66	11.02	61.43	6.61	16.51	53.36	17.95
72.47	63.34	225.69	13.25	27.88	87.4	28.06	63.42	56.01	193.85	11.23	38.47	88.32	28.9	147.12	133.27	263.09	11.2	34.09	90.59	50.66	100.85	96.53	219.76	9.04	27.51	95.72	43.93
51.38	39.99	165.31	10.81	31.42	77.83	24.19	34.07	24.46	106.63	8.77	19.48	71.77	22.93	63.82	23.96	101.7	6.88	42.24	37.55	23.56	141.84	138.71	235.08	8.36	28.11	97.79	59.01
81.15	71.56	221.23	8.63	32.64	88.18	32.34	47.08	37.51	197.52	9.42	25.16	79.68	18.99	52	37.06	245.69	10.41	47.6	71.28	15.09	41.89	9.95	104.8	7.84	34	23.75	9.49
14.12	8.03	34.38	3.21	74.28	56.85	23.34	34.96	8.68	74.08	5.3	49.98	24.81	11.71	34.66	17.28	86.61	12.61	192.59	49.87	19.96	24.78	13.97	73.46	6.46	34	56.37	19.01
45.24	4	109.87	15.99	38.81	8.84	3.64	55.11	35.98	178.64	8.6	42.84	65.28	20.14	126.99	121.32	243.79	8.35	30.26	95.53	49.76	118.45	113.7	241.16	10.83	33.4	95.99	47.15
20.61	13.29	65.1	3.81	35.77	64.48	20.41	54.35	41.82	204.44	11.43	30.6	76.95	20.46	145.26	141.47	237.38	9.89	35.08	97.39	59.6	51.66	16.43	92.18	6.78	33.79	31.81	17.83
43.32	25.82	121.67	11.19	25.64	59.59	21.22	64.01	51.51	165.3	11.54	22.08	80.47	31.16	76.66	64.26	226.96	12.01	31.96	83.82	28.32	110.1	107.82	252.78	9.4	33.32	97.93	42.65
87.86	83.36	178.62	9.18	25.16	94.88	46.67	104.56	99.5	239.02	9.32	22.33	95.17	41.63	93.12	88.57	214.95	8.65	23.8	95.12	41.21	82.39	80.26	172.42	8.73	21.08	97.41	46.55
37.1	6.56	65.19	5.63	82.28	17.68	10.06	25.15	14.42	61.77	5.12	38.94	57.32	23.34	135.49	128.83	232.06	11.13	29.57	95.08	55.51	41.89	26.2	160.85	11.89	40.8	62.55	16.29
116.86	107.32	268.15	12.28	25.2	91.84	40.02	99.9	95.36	207.48	10.43	30.6	95.45	45.96	32.44	15.41	79.2	7.58	31.96	47.49	19.46	112.09	96.94	228.12	10.3	37.57	86.49	42.5
25.67	8.04	79.57	7.11	52.96	31.31	10.1	64.91	58.91	146.08	8.3	17	90.75	40.33	58.44	46.02	110.29	4.75	37.57	78.75	41.73	78.53	5.52	308.43	26.16	223.56	7.03	1.79
79.66	58.89	226.57	13.78	29.92	73.92	25.99	89.1	84.87	162.73	8.19	17.68	95.25	52.15	114.67	111.02	241.14	9.83	38.27	96.81	46.04	142.08	134.58	247.39	8.71	35.08	94.72	54.4
22.96	10.61	80.34	6.83	63.83	46.2	13.2	49.92	39.86	145.54	10.66	23.8	79.85	27.39	134.34	112.96	222.16	9.56	30.95	84.08	50.85	82.95	77.96	204.01	8.39	32.33	93.99	38.21
99.34	90.89	247.37	8.05	43.01	91.5	36.74	62.14	8.84	167.13	16.63	29.22	14.23	5.29	107.79	103.46	213.04	9.92	17.82	95.99	48.56	94.14	91.12	201.06	12.86	21.76	96.8	45.32
91.53	78.32	235	11.44	36.88	85.57	33.33	38.29	7.33	96.25	12.13	127.33	19.13	7.61	83.61	76.17	112.88	4.69	37.83	91.11	67.48	47.54	6.01	183.57	21.32	143.48	12.63	3.27
131.98	122.03	265.89	9.94	27.83	92.46	45.9	73.96	71.14	155.41	9.89	16.7	96.19	45.78	46.56	21.48	119.45	18.55	123.81	46.13	17.98	75.65	73.55	196.98	9.76	18.02	97.22	37.34
50.32	0.52	109.3	14.24	227.1	1.04	0.48	78.91	73.84	161.65	9.64	27.2	93.57	45.68	111.82	108.95	233.01	9.58	27.14	97.43	46.76	123.92	121.52	247.61	10.37	30.26	98.06	49.08
35.58	18.38	81.88	7.45	21.76	51.64	22.44	92.06	87.96	217.94	12.64	21.76	95.55	40.36	58.08	19.33	172.65	8.15	70.16	33.28	11.2	46.69	7.57	87.92	7.73	46.54	16.22	8.61
85.08	70.52	227.3	8.05	45.92	82.89	31.02	108.56	102.07	186.89	9.96	23.23	94.02	54.62	82.87	78.87	170.9	7.93	18.62	95.17	46.15	47.17	26.4	201.89	9.84	55.02	55.95	13.07
86.42	9.6	149.67	7.73	53.04	11.11	6.41	75.76	68.21	182.71	12.81	25.28	90.03	37.33	51	9.83	137.13	21.88	70.16	19.28	7.17	60.65	55.78	208.61	12.51	17.1	91.96	26.74
41.36	5.35	111.86	15.01	116.96	12.95	4.79	40.49	33.94	136.95	10.45	15.82	83.83	24.78	111.83	105.74	213.76	9.76	22.96	94.55	49.46	47.84	24.38	166.78	11.52	49.75	50.97	14.62
26.43	14.17	73.69	4.95	46.77	53.62	19.23	68.36	65.36	158.68	11.27	13.6	95.61	41.19	128.11	124.77	223.58	12.19	23.8	97.39	55.81	148.77	144.32	254.71	10.33	38.76	97.01	56.66
83.98	62.25	256.74	8.61	45.39	74.12	24.25	67.74	51.89	197.52	24.63	22.35	76.6	26.27	117.29	113.9	230.27	8.05	24.64	97.11	49.46	107.62	102.12	211.16	13.91	27.1	94.89	48.36
109.93	100.62	221.63	12.91	27.33	91.53	45.4	46.98	42.85	117.7	11.62	15.82	91.19	36.4	24.45	7.29	60.33	5.96	66.72	29.83	12.09	116.91	114.3	218.58	7.16	29.24	97.77	52.29
48.55	33.24	127.34	9.48	26.33	68.46	26.1	35.22	13.76	144.28	8.39	31.31	39.06	9.53	111.78	109.17	193.71	9.86	28.2	97.66	56.35	34.56	18.2	97.71	9.26	26.36	52.65	18.62
50.3	43.62	168.75	11.51	21.08	86.73	25.85	61	56.2	227.12	11.54	24.48	92.14	24.74	71.17	59.82	134.86	12.05	26.82	84.05	44.36	17.57	7.16	50.48	4.6	40.58	40.73	14.18
46.32	17.98	175.39	9.12	76.35	38.81	10.25	43.1	20.58	125.63	8.35	31.72	47.75	16.38	37.83	14.15	118.23	9.31	60.52	37.4	11.97	45.35	27.48	140.01	9.23	38.08	60.6	19.63
50.66	28.17	203.3	18.88	65.28	55.6	13.86	52.2	49.21	173.89	11.13	15.13	94.27	28.3	44.84	13.38	71.6	15.89	125.18	29.84	18.69	142.26	137.39	266.85	9.5	36.61	96.58	51.49
106.94	98.55	225.74	10.09	36.42	92.16	43.66	38.12	11.29	140.39	10.38	59.84	29.62	8.04	33.07	18.54	72.83	4.85	60.53	56.06	25.46	122.97	120.86	207.74	10.18	37.14	98.29	58.18
109.64	106.59	256.82	8.8	26.75	97.21	41.5	43.06	14.69	103.25	9.55	31.96	34.11	14.23	115.02	108.57	216.13	7.88	25.16	94.4	50.24	138.31	134.88	248.17	9.66	35.77	97.53	54.35
77.7	69.88	204.36	9.72	26.02	89.93	34.19	70.77	66.92	194.49	11.1	23.39	94.55	34.41	46.24	44.15	74.66	3.28	35.9	95.49	59.13	58.25	55.74	134.89	9.71	12.24	95.69	41.32
100.74	70.54	208.76	15.39	26.36	70.03	33.79	53.77	3.99	130.64	10.69	67.19	7.41	3.05	56.97	40.65	162.29	9.34	47.6	71.36	25.05	54.67	9.04	127.02	11.33	47.6	16.53	7.12
58.13	53.78	144.33	8.48	17	92.52	37.26	74.62	72.29	208.79	8.12	33.7	96.87	34.62	97.99	95.84	202.06	9.3	24.48	97.81	47.43	37.73	2.98	106.64	6.15	82.96	7.89	2.79
54.78	7.36	106.26	8.34	50.79	13.43	6.93	57.61	52.32	170.07	10.04	15.82	90.82	30.77	119.25	112.73	256.64	9.94	31.64	94.53	43.93	53.38	16.09	97.27	6.75	38.97	30.14	16.54
89.47	84.2	205.83	10.34	39.89	94.11	40.91	77.36	56.88	152.66	6.81	37.4	73.53	37.26	30.44	10.66	80.91	6.59	35.49	35.03	13.18	133.14	126.91	215.23	8.12	33.01	95.32	58.97
64.56	14.42	221.58	27.65	132.2	22.33	6.51	21.25	9.47	50.82	4.24	63.97	44.56	18.63	81.91	0.94	156.44	25.72	187.49	1.14	0.6	23.07	5.24	66.5	5.79	89.08	22.7	7.87
127.74	122.01	229.88	7.9	33.01	95.52	53.08	21.93	7.48	54.25	4.16	59.16	34.11	13.79	49.71	3.22	121.94	13.01	64.6	6.48	2.64	32.08	12.26	98.1	5.43	36.61	38.2	12.49
118.95	111.8	218.89	9.43	27.88	93.99	51.07	128.44	110.65	232.72	17.5	31.31	86.15	47.55	114.83	108.18	237.15	10.13	28.56	94.21	45.62	25.24	8.3	61.47	4.28	62.56	32.88	13.5
82.81	76.63	229.61	12.42	20.4	92.54	33.38	43.83	20.77	88.68	4.18	26.23	47.39	23.43	40.84	16.15	139.01	8.36	51.39	39.54	11.62	138	135	241.48	10.68	34.79	97.83	55.9
22.54	9.75	71.21	4.91	48.83	43.27	13.7	40.4	24.77	116.83	10.9	32.38	61.31	21.2	97.3	93.93	191.5	11.95	18.85	96.53	49.05	40.52	11.12	113.99	7.14	85.68	27.43	9.75
109.73	106.6	187.67	9.37	22.7	97.15	56.8	77.34	71.84	211.6	9.99	24.64	92.88	33.95	128.18	123.53	279.64	11.26	29.92	96.37	44.18	105.14	103.42	242.37	10	35.08	98.36	42.67
41.52	7.87	82.52	5.05	39.2	18.97	9.54	50.51	48.15	133.52	8.58	18.9	95.31	36.06	76.06	67.25	114.01	4.69	46.92	88.42	58.98	138.46	134.52	223.49	15.73	30.95	97.16	60.19
6.52	2.19	22.71	1.8	92.48	33.58	9.64	48.68	39.75	148.49	8.59	24.48	81.65	26.77	104.81	90.42	185.62	11.17	24.48	86.27	48.71	82.6	64.33	186.08	12.64	25.16	77.88	34.57
65.99	45.87	211	12.32	44.88	69.51	21.74	18.65	4.07	29.79	3.12	33.14	21.84	13.67	127.3	119.37	245.91	7.96	25.45	93.77	48.54	139.12	135.05	226.51	9.89	36.13	97.07	59.62
49.21	37.73	136.28	11.77	16.51	76.67	27.69	92.55	87.5	171.27	9.13	30.6	94.55	51.09	64.37	61.41	117.72	5.96	39.2	95.39	52.16	148.06	146.24	221.6	10.2	37.14	98.77	65.99
57.87	10.78	113.87	17.16	34.68	18.63	9.47	94.23	84.21	211.5	11.91	31.44	89.36	39.82	49.76	32.52	170.34	13.88	24.48	65.35	19.09	45.56	3.46	152.85	13.35	88.88	7.6	2.27
71.12	66.14	194.7	9.66	15.65	93.01	33.97	144.03	139.88	178.34	9	26.14	97.12	78.43	45.51	17.87	111.41	7.67	31.64	39.27	16.04	53.12	21.32	139.57	9.98	46.46	40.14	15.28
130.38	126.26	288.18	8.64	27.14	96.84	43.81	72.26	69	147.41	12.01	14.28	95.49	46.81	127.5	124.37	244.66	12.48	35.36	97.54	50.83	117.2	109.38	231.8	10.8	30.6	93.32	47.19
89.45	76.72	219.99	18.67	34.39	85.77	34.88	67.11	64.62	146.71	10.48	16.51	96.29	44.04	92.36	82	179.7	14.84	26.52	88.78	45.63	155.79	151.32	251.53	9.98	33.37	97.13	60.16
91.22	67.08	224.16	15.91	36.15	73.53	29.93	104.55	99.66	224.37	10.71	25.64	95.33	44.42	47.93	28.22	135.65	10.61	30.6	58.87	20.8	35.7	8.61	80.63	5.42	36.74	24.11	10.67
41.59	23.3	99.37	8.39	19.26	56.03	23.45	159.23	157.94	255.3	10.95	40.8	99.19	61.86	62.31	48.17	128.94	7.26	39.3	77.3	37.36	103.87	100.9	153.62	7.47	24.86	97.13	65.68
88.92	83.98	210.44	10.68	19.48	94.44	39.91	27.14	6.8	58.17	3.92	25.13	25.05	11.68	84.53	77.85	212.42	11.37	32.91	92.1	36.65	57.3	11.55	95.67	21.19	107.85	20.15	12.07
20	9.24	78.12	4.94	65.28	46.22	11.83	126.78	119.9	222.2	10.35	26.44	94.57	53.96	59.79	38.3	159.17	12.84	17.68	64.06	24.06	38.1	16.73	87.7	10.68	14.96	43.9	19.07
44.67	24.48	214.45	10.64	46.08	54.81	11.42	130.02	125.97	225.77	8.85	28.89	96.88	55.8	57.08	34.57	115.56	12.4	37.4	60.57	29.92	49.84	34.54	168.72	8.7	45.39	69.31	20.47
12.14	6.42	43.98	2.66	62.65	52.93	14.61	50.41	15.84	166.8	16.99	57.77	31.43	9.5	107.18	103.99	262.42	8.25	26.82	97.02	39.63	150.71	95.16	259.04	16.64	33.32	63.14	36.74
42.27	11.55	93.1	7.45	54.27	27.32	12.4	55.47	50.29	147.43	11.65	17	90.67	34.11	140.58	132.15	276.05	10.54	33.01	94	47.87	88.43	83.93	183.31	8.51	19.3	94.92	45.79
78.36	59.42	248.84	13.06	46.62	75.83	23.88	73.77	64.77	130.4	15.62	13.6	87.8	49.67	62.12	7.06	113.97	5.61	49.64	11.36	6.19	83.67	78.82	195.34	9.93	23.8	94.21	40.35
125.6	120.17	221	7.99	22.44	95.68	54.38	73.38	51.1	177.14	10.12	35.77	69.64	28.85	36.52	7.07	73.53	5.29	59.15	19.37	9.62	51.85	41.91	203.19	10.91	29.21	80.84	20.63
10.49	1.41	35.81	4.11	89.09	13.46	3.94	48.63	44.54	95.71	8.15	15.51	91.59	46.54	112.71	108.52	231.26	9.83	33.01	96.28	46.93	45.03	32.79	138.47	9.83	29.92	72.83	23.68
121.51	116.78	196.55	11.01	22.7	96.11	59.41	52.05	50.07	163.96	10.89	19.41	96.2	30.54	58.13	55.61	95.34	4.47	32.71	95.66	58.32	132.31	127.54	220.74	8.44	31.64	96.39	57.78
105.45	95.12	231.92	12.16	29.92	90.21	41.02	63.93	23.71	146.19	13.21	27.53	37.08	16.22	30.9	15.88	74.84	7.11	44.88	51.38	21.21	53.1	43.94	120.17	5.39	41.05	82.75	36.57
45.79	14.32	148.22	9.44	34.39	31.28	9.66	68.12	63.56	194.63	12.78	23.39	93.31	32.66	79.49	75.01	231.02	9.57	22.05	94.36	32.47	123	116.87	293.53	9.19	28.53	95.01	39.81
92.92	88.23	177.82	11.26	15.82	94.95	49.62	156.59	151.97	237.1	9.45	33.32	97.05	64.1	52.05	11.98	175.01	23.33	61.9	23.01	6.84	108.04	102.8	198.71	8.72	21.57	95.14	51.73
113.62	105.76	240.91	10.6	22.67	93.08	43.9	19.4	11.69	56.88	3.02	43.52	60.29	20.56	51.88	6.25	129.38	7.09	50.79	12.04	4.83	70.1	47.7	132.22	13.18	36.72	68.04	36.08
21.14	0.92	84.48	26.23	81.38	4.33	1.08	71.17	63.94	236.22	10.49	24.07	89.84	27.07	129.64	124.54	219.97	8.65	27.14	96.07	56.62	143.39	140.14	240.34	9.85	29.31	97.73	58.31
27.8	13.61	67.08	5.88	63.5	48.96	20.29	86.62	82.11	170.41	10.35	17	94.8	48.19	46.43	33.92	96.11	6.06	30.95	73.06	35.3	48.94	41.72	210.15	9.39	32.38	85.25	19.85
118.35	109.03	213.97	8.87	22.7	92.13	50.96	46.58	27.29	187.43	9.36	50.21	58.58	14.56	63.67	56.89	105.69	4.51	37.4	89.35	53.83	119.1	114.43	211.64	8.83	25.16	96.08	54.07
41.35	10.68	107.9	9.23	42.64	25.82	9.9	17.38	16.07	37.47	2.13	44.88	92.49	42.9	99.94	95.12	218.97	10.99	25.45	95.18	43.44	47.72	17.95	143.15	12.02	19.04	37.62	12.54
83.4	79.8	223.46	10.76	15.64	95.69	35.71	68.3	45.27	157.74	9.53	24.24	66.29	28.7	61.57	52.63	111.52	6.1	33.4	85.49	47.2	28.75	12.23	74.08	6.82	32.06	42.54	16.51
59.73	12.01	96.37	13.82	46.92	20.12	12.47	47.01	42.46	70.63	3.46	35.56	90.32	60.11	53.01	13.79	96.26	13.65	146.5	26.01	14.32	132.98	130.3	194.75	10	26.82	97.98	66.91
69.49	11.27	131.11	6.77	51.39	16.22	8.6	66.32	28.36	147.8	13.98	43.14	42.76	19.19	88.01	75.81	237.69	11.22	29.24	86.15	31.9	42.31	26.99	105.92	9.8	21.08	63.8	25.48
128.18	123.01	245.51	12.25	28.89	95.96	50.1	61.67	38.35	215.88	18.96	51.29	62.2	17.77	41.9	14.23	115.98	10.81	33.96	33.97	12.27	73.39	49.24	114.98	9.62	40.58	67.1	42.82
22.01	10.27	95.96	7.59	67.4	46.67	10.7	128.63	124.37	177.35	6.67	30.26	96.68	70.12	100.17	90.31	223.74	17.08	26.05	90.16	40.37	42.23	33.33	140.19	11.4	23.94	78.93	23.78
41.45	17.05	96.39	7.37	16.32	41.14	17.69	56.57	21.13	175.24	15.16	68.29	37.35	12.06	71.76	68.97	174.74	8.93	14.96	96.1	39.47	65.45	37.44	156.15	12.9	22.96	57.2	23.98
35.28	15.97	98.45	21.16	247.51	45.28	16.23	37.88	10.23	86.68	6.96	44.71	27.01	11.8	120.92	115.26	236.94	15.64	29.92	95.32	48.65	43.59	12.89	84.41	8.11	49.87	29.57	15.27
30.1	9.53	90.18	8.16	41.48	31.66	10.57	129.5	126.29	214.19	10.92	33.16	97.52	58.96	62.6	51.83	231.29	10.59	43.83	82.8	22.41	35.87	16.69	158.42	10.26	76.35	46.54	10.54
54.81	18.14	122.12	17.38	34.07	33.1	14.85	103.3	96.81	200.95	12.1	22.27	93.71	48.18	116.42	111.82	237.39	10.28	28.89	96.05	47.1	99.96	94.06	209.34	8	25.34	94.1	44.93
88.85	61.56	210.99	17.52	26.52	69.28	29.18	56.31	53.28	182.73	11.64	13.6	94.63	29.16	54.47	22.48	123.51	7.52	43.52	41.27	18.2	168.19	166.7	223.07	9.6	30.95	99.11	74.73
44.81	16.51	88.6	5.42	49.52	36.84	18.63	121.73	118.55	254.88	10.11	35.36	97.39	46.51	48.11	40.33	111.45	8.62	63.4	83.83	36.19	94.92	89.51	138.56	8.34	19.04	94.3	64.6
111.85	106.51	242.88	7.84	25.74	95.23	43.85	118.32	108.68	206.29	8.03	27.51	91.85	52.69	63.1	38.98	217.95	10.86	50.21	61.78	17.89	138.11	133.55	225.78	9.7	32.64	96.69	59.15
124.96	116.61	230.86	9.04	24.07	93.32	50.51	137.44	132.92	245.31	10.14	29.92	96.71	54.18	58.7	44.8	165.19	8.96	38.08	76.32	27.12	37.17	9.25	148	8.72	54.07	24.9	6.25
38.46	24.2	131.55	9.84	22.44	62.93	18.4	84.26	68.33	139.45	7.57	23.8	81.09	49	77.84	72.12	123.47	6.62	36.72	92.65	58.41	100.65	97.94	275.23	10.97	33.7	97.31	35.59
104.85	99.5	223.11	15.64	23.94	94.9	44.6	64.07	59.93	161.85	11.1	21.76	93.53	37.03	95.53	91.87	200.69	6.36	28.23	96.17	45.78	52.35	34.31	138.4	7.98	39.2	65.54	24.79
59.01	44.55	162.88	10.17	17.68	75.5	27.35	97.09	91.4	209.02	10.37	19.72	94.14	43.73	43.44	33.02	207.87	10.67	46.14	76.02	15.89	80.88	74.45	200.81	10.12	25.16	92.05	37.08
55.11	22.84	124.17	7.99	35.49	41.44	18.39	55.47	49.8	185.16	11.32	21.12	89.79	26.9	69.9	50.89	163.99	7.53	41.48	72.8	31.03	109.26	104.55	320.27	10.84	29.92	95.69	32.64
82.79	74.11	246.57	10.21	25.84	89.51	30.06	53.65	44.91	188.66	9.62	23.66	83.71	23.8	85.2	80.5	208.93	22.11	22.44	94.49	38.53	116.4	107.01	236.62	8.76	28.53	91.93	45.22
50.14	9.9	134.36	8.15	118.18	19.74	7.37	54.73	26.93	216.89	13.71	66.03	49.22	12.42	64.2	60.93	144.01	10.86	16.32	94.89	42.31	89.61	76.12	258	12.08	33.7	84.95	29.5
19.71	2.63	90.95	27.01	140.57	13.33	2.89	154.11	148.88	211.37	11.51	23.07	96.61	70.44	130.79	123.82	245.11	11.02	30.27	94.67	50.51	57.34	55.49	152.21	8.1	11	96.77	36.46
36.7	9.04	102.89	10.78	65.28	24.63	8.79	48.73	40.31	169.59	13.14	17	82.73	23.77	40.31	15.14	169.2	10.12	79.17	37.56	8.95	36.34	23.52	174.08	9.55	33.32	64.71	13.51
82.13	72.04	218.6	9.86	24.35	87.72	32.96	135.87	130.54	205.19	6.6	39.89	96.07	63.62	43.42	22.68	107.74	8.19	40.58	52.24	21.05	74.62	71.49	163.92	5.29	44.2	95.81	43.61
114.13	92.36	248.93	11.43	31.72	80.93	37.1	97.01	92.64	148.53	11.56	19.33	95.49	62.37	61.54	38.42	233.91	13.54	32.33	62.42	16.42	43.02	20.13	118.53	8.58	35.36	46.78	16.98
48.95	21.82	161.85	10.56	35.36	44.58	13.48	67.5	28.9	149.1	11.3	35.36	42.81	19.38	43.52	35.76	155.71	11.31	16.24	82.16	22.96	108.98	107.23	209.73	9.6	38.52	98.4	51.13
15.52	5.95	50.24	2.63	50.57	38.31	11.84	155.01	152.2	184.25	10.12	24.22	98.19	82.6	156.42	146.36	220.81	17.96	34.09	93.57	66.28	35.63	14.31	136.59	8.07	63.92	40.17	10.48
55.7	34.34	191.64	20.05	16.78	61.65	17.92	114.52	108.96	150.58	7.56	26.75	95.15	72.36	19.45	8.1	52.47	5.35	40.8	41.65	15.44	49.89	29.16	203.03	10.37	56.36	58.45	14.36
76.36	70.92	239.98	10.67	27.2	92.88	29.55	81.69	58.6	161.37	25.81	68.88	71.74	36.32	74.52	48.67	191.24	13.3	35.08	65.31	25.45	58.57	26.55	108.88	10.7	21.32	45.33	24.38
89.18	85.5	147.77	6.36	19.04	95.87	57.86	58.11	26.8	174.17	12.03	19.72	46.12	15.39	121.86	112.63	256.09	10.47	36.04	92.43	43.98	153.57	143.71	214.6	9.66	35.77	93.58	66.97
93.13	86.86	208.64	12.2	17.1	93.27	41.63	52.64	33.94	147.54	11.89	40.45	64.48	23.01	116.17	110.76	212.37	8.37	30.26	95.34	52.15	85.79	74.1	251.9	11.08	31.28	86.37	29.42
95.23	90.74	231.05	11.12	20.19	95.28	39.27	82.22	77.67	189.83	8.32	17.39	94.47	40.92	82.6	76.78	126	5.36	46.92	92.96	60.94	83.24	56.07	217.28	17.48	38.01	67.36	25.8
38.72	14.9	78.4	12.44	55.71	38.48	19	106.65	99.66	218.82	11.61	17.68	93.44	45.54	68.47	63.38	148.91	10.16	21.32	92.57	42.56	64.75	56.93	161.6	11.45	25.84	87.92	35.23
31.99	12.8	74.74	4.83	34	40.01	17.12	106.29	93.5	204.21	15.07	27.51	87.97	45.79	60.26	17.49	144.78	10.55	60.53	29.02	12.08	47.67	16.57	186.29	13.25	53.19	34.76	8.89
109.99	98.19	233.69	8.73	20.18	89.27	42.02	156.98	147.81	239.61	11.58	23.8	94.16	61.69	93.88	88.67	250.25	10.59	29.92	94.44	35.43	76.09	63.82	218.62	10.01	28.03	83.87	29.19
61.15	40.03	290.4	9.59	63.28	65.47	13.78	27.23	6.92	72.86	5.43	63.16	25.41	9.5	137.98	134.47	237.46	10.52	39.66	97.45	56.63	31.14	7.2	62.93	4.72	47.46	23.13	11.44
56.24	33.99	245.69	11	74.8	60.44	13.84	73.24	70.19	234.82	10.42	31.64	95.84	29.89	122.18	116.97	190.08	11.76	30.27	95.73	61.54	145.71	133.18	257.2	10.26	32.77	91.4	51.78
56.04	15.83	105.41	7.37	48.28	28.24	15.01	55.88	37.74	167.93	11.04	33.4	67.54	22.47	57.29	37.87	210.34	11.07	50.69	66.1	18	154.58	151.97	257.08	10.46	32.64	98.31	59.12
52.75	45.64	78.65	4.75	37.83	86.52	58.03	79.81	77.73	200.7	10.5	21.32	97.39	38.73	102.33	63.93	146.24	12.56	23.23	62.48	43.72	174.29	171.14	221.03	9.01	32.64	98.19	77.43
117.75	112.79	231.49	8.69	26.44	95.79	48.73	85.66	83.26	175.71	9.27	25.16	97.2	47.38	77.75	75.61	173.1	9.8	16.32	97.24	43.68	67.98	39.26	195.63	14.22	43.52	57.74	20.07
34.64	13.37	73.74	5.99	59.16	38.6	18.13	16.01	4.99	53.28	4.87	58.48	31.16	9.36	85.42	84.07	189.86	12.26	22.44	98.42	44.28	97.48	94.42	228.04	9.03	27.51	96.86	41.41
68.72	59.04	205.49	11.21	20.18	85.91	28.73	61.14	51.81	203.9	12.71	31.96	84.75	25.41	73.4	70.92	139.27	8.77	17.4	96.61	50.92	66.48	10.4	138.28	10.63	23.8	15.64	7.52
41.11	14.81	100.49	10.66	30.98	36.02	14.74	92.92	83.04	242.22	17.79	24.76	89.37	34.28	34.24	12.07	86.85	7.47	33.86	35.25	13.9	20.75	11.1	79.48	4.25	28.16	53.46	13.96
95.65	89.95	171.84	9.79	19.48	94.04	52.35	45.09	23.05	112.03	9.31	31.64	51.13	20.58	59.04	17.66	111.58	6.94	43.33	29.91	15.83	36.05	12.63	113.73	10.69	25.84	35.05	11.11
50.7	20.71	181.6	10.49	62.59	40.85	11.4	72.38	63.26	228.35	14.67	38.08	87.4	27.7	60.04	19.6	157.33	11.8	33.01	32.64	12.46	43.92	32.55	167.11	11.12	31.28	74.1	19.48
60.97	46.09	178.13	12.24	23.66	75.6	25.88	51.23	0.82	169.91	18.67	202.63	1.61	0.49	9.89	2.95	37.7	5.16	102.28	29.82	7.82	81.48	78.97	209.31	9	21.76	96.92	37.73
56.73	40.48	147.56	11.38	25.74	71.36	27.44	55.83	50.53	86.21	8.61	124.44	90.5	58.61	145.13	143.6	209.91	10.41	29.92	98.94	68.41	108.18	85.88	120.63	4.53	29.17	79.39	71.19
32.88	11.19	97.82	7.83	19.18	34.03	11.44	74.47	69.04	162.51	8.86	20.4	92.71	42.48	88.21	83.64	214.6	9.1	20.63	94.82	38.97	48.85	19.99	110.45	11.35	97.58	40.93	18.1
147.54	144.25	261.09	7.48	31.17	97.77	55.25	34.59	14.94	96.3	11.29	54.34	43.2	15.52	72.1	67.71	206.73	9.96	17	93.9	32.75	86.17	85	148.2	8.54	18.36	98.64	57.35
112.22	99.15	221.42	9.06	25.34	88.36	44.78	37.23	17.57	79.71	4.98	45.76	47.19	22.04	154.89	153.83	240.46	11.34	32.7	99.32	63.97	60.71	53.41	149.63	9.93	16.41	87.98	35.7
41.06	31.6	76.12	14.27	123.42	76.97	41.52	139.23	134.99	237.09	10.12	32.41	96.95	56.93	161.06	159.88	242.94	10.3	42.44	99.27	65.81	45.48	35.01	147.14	13.21	27.98	76.99	23.79
79.13	22.68	221.31	12.92	51.58	28.67	10.25	74.52	12.04	175.8	15.03	49.64	16.16	6.85	57.6	30.99	115.8	7.44	27.83	53.8	26.76	51.53	23.72	156.87	9.83	34.49	46.04	15.12
53.06	4.66	130.78	12.25	69.81	8.79	3.56	65.53	58.64	199.07	8.12	30.56	89.49	29.46	54.06	4.6	149.03	10.43	47.87	8.51	3.09	34.03	12.01	89.14	21.36	50.79	35.29	13.47
43.51	14.38	106.61	6.48	48.15	33.06	13.49	35.41	10.49	86.08	5.54	38.76	29.61	12.18	83.1	72.41	198.44	8.24	31.83	87.14	36.49	77.15	70.85	113.33	4.42	41.96	91.83	62.51
28.74	11.41	85.61	9.67	37.04	39.69	13.32	131.28	129.42	213.33	9.96	27.29	98.58	60.66	114.09	107.73	247.9	10.95	31.31	94.42	43.46	176.5	175.29	244.81	10.37	30.95	99.31	71.6
35.89	5.55	83.54	7.08	123.76	15.48	6.65	88.54	69.94	220.87	14.59	34.68	79	31.67	128.78	116.44	191.38	15.94	31.72	90.42	60.84	46.13	25.17	165.33	10.7	53.04	54.57	15.23
137.28	130.24	211.06	11.41	25.05	94.88	61.71	57.15	15.26	187.86	13.93	51.58	26.7	8.12	41.32	37.39	168.16	21.63	21.76	90.47	22.23	98.55	94.13	165.78	8.62	21.82	95.51	56.78
115.2	112.89	197.09	9.18	26.44	97.99	57.28	76.96	72.93	183.03	12.18	14.28	94.76	39.84	61.66	42.52	200.02	11.55	62.38	68.96	21.26	79.07	72.4	241.59	10.53	28.49	91.56	29.97
107.47	100.54	230.61	9.74	21.08	93.55	43.6	72.25	48.15	105.47	16.25	215.28	66.64	45.65	58.77	14.04	111.26	14.97	52.96	23.89	12.62	66.78	64.71	106.88	5.19	17.3	96.91	60.55
99.22	96.09	206.74	12.11	17.68	96.84	46.48	28.19	9.12	67.59	8.86	139.16	32.35	13.5	161.39	159.59	293.94	11.34	43.41	98.89	54.3	53.06	3.41	93.89	8.06	56.6	6.42	3.63
74.25	36.74	162.48	11.65	47.87	49.48	22.61	41.55	17.85	97.6	7.14	61.2	42.95	18.28	68.27	7.03	163.67	15.46	18.57	10.29	4.29	121.03	110.66	219.5	10.68	22.7	91.43	50.42
66.19	57.84	209.65	10.58	27.88	87.39	27.59	52.88	48.42	155.27	11.91	17	91.56	31.18	135.93	133.99	241.14	7.32	43.08	98.57	55.57	72.38	38.25	156.04	13.47	39.41	52.85	24.51
25.5	5.29	65.29	6.37	29.92	20.74	8.1	46.58	12.63	107.03	7.29	31.17	27.11	11.8	61.01	59.68	140.23	6.81	20.32	97.83	42.56	24.33	16.16	77.27	9.34	34.79	66.42	20.91
124.87	120.91	241.39	10.57	28.07	96.83	50.09	59.02	35.76	239.13	13.49	68.68	60.59	14.95	141.07	132.08	227.14	10.44	29.58	93.63	58.15	52.39	47.69	165.28	13.32	20.81	91.04	28.86
32.79	8.48	94.12	16.01	207.97	25.86	9.01	98.58	70.75	240.16	12.14	27.88	71.77	29.46	61.65	51.59	92.21	4.67	26.14	83.69	55.95	52.53	20.48	118.12	7.89	32.01	38.99	17.34
67.85	64.8	225.86	10.44	21.08	95.5	28.69	44.53	21.02	148.77	15.4	56.36	47.21	14.13	180.15	178.97	205.83	9.94	18.54	99.35	86.95	155.66	152.84	228.98	10.77	41.75	98.19	66.75
142.82	141.5	225.58	11.42	38.58	99.07	62.73	48.09	23.15	105.55	9.48	39.89	48.14	21.93	24.24	12.53	70.17	5.54	48.48	51.68	17.85	50.9	28.79	185.95	10.29	49.64	56.56	15.48
37.08	14.73	93.6	6.34	79.1	39.73	15.74	75.27	41.7	185.54	9.06	33.01	55.4	22.48	117.83	115.43	203.38	7.67	32.64	97.97	56.76	169.88	168.58	268.9	10.7	41.96	99.24	62.69
28.95	11.42	90.68	8.64	34	39.44	12.59	65.74	48.52	159.38	8.23	47.46	73.81	30.44	45.86	19.6	107.27	7.83	37.14	42.75	18.28	53.69	19.17	123.62	11.58	33.01	35.71	15.51
104.01	79.96	272.34	12.85	34.09	76.88	29.36	65.25	18.36	190.96	12.05	42.64	28.14	9.61	150.57	145.45	269.59	9.63	33.7	96.6	53.95	132.76	125.66	213.03	9.62	28.16	94.66	58.99
40.96	12.15	80.56	5.31	65.96	29.66	15.08	129.79	121.53	199.36	9.33	23.8	93.64	60.96	77.97	42.16	154.24	10.79	33.4	54.07	27.33	70.68	62.38	223.77	13.97	23.8	88.25	27.87
146.41	143.93	223.62	10.66	34	98.31	64.36	58.6	44.08	192.29	11.21	26.52	75.22	22.92	73.73	69.78	181.73	9.86	21.32	94.65	38.4	149.47	142.28	213.17	7.18	34.39	95.19	66.75
62.45	54.02	216.6	9.19	23.8	86.5	24.94	50.97	31.66	139.72	16.44	51.8	62.12	22.66	55.1	52.52	93.78	4.69	34.39	95.32	56	54.95	37.71	175.23	11.55	39.89	68.64	21.52
46.57	29.29	251.11	10.28	68.99	62.9	11.66	153.76	141.32	256.27	14.72	41.75	91.9	55.14	84.05	38.64	224.94	17.21	46.77	45.97	17.18	146.82	142.91	221.46	9.33	32.84	97.33	64.53
111.76	110.89	183.17	8.69	25.16	99.22	60.54	151.02	137.99	214.42	10.58	22.44	91.37	64.35	120.57	114.91	187.07	8.47	26.52	95.3	61.42	107.32	102.76	196.56	8.97	23.77	95.76	52.28
44.62	24.29	117.89	5.99	26.82	54.43	20.6	49.18	31.1	129.01	11	25.64	63.24	24.11	75.28	26.66	144.52	8.71	41.75	35.42	18.45	68.06	54.36	235.14	10.59	38.27	79.88	23.12
74.5	61.03	175.75	10.86	20.43	81.92	34.73	50.12	22.37	119.81	9.71	34.19	44.64	18.67	32.65	7.69	88.47	8.87	80.92	23.56	8.69	31.17	7.72	77.74	5.72	58.48	24.76	9.93
81.4	47.37	210.82	24.81	32.01	58.2	22.47	115.67	110.45	199.77	12.59	20.87	95.48	55.29	50.41	21.76	95.13	5.41	40.58	43.16	22.87	36.39	11.93	118.09	9.12	40.84	32.79	10.1
37.98	11.32	97.12	7.54	36.08	29.81	11.66	63.68	50.29	165.93	8.51	35.77	78.98	30.31	24.09	5.94	70.88	4.45	92.85	24.67	8.38	55.49	25.37	153.06	10.72	40.8	45.72	16.57
115	105.77	184.07	9.29	22.44	91.97	57.46	46.08	29.58	140.74	10.74	29.22	64.19	21.02	78.98	73.41	189.81	11.35	16.51	92.95	38.67	65.73	59.57	167.8	11.03	19.72	90.63	35.5
58.75	41.72	232.58	12.78	41.05	71.01	17.94	23.62	11.25	65.61	6.66	57.12	47.62	17.14	102.67	100.17	167.54	7.85	27.35	97.57	59.79	173.39	172.01	208.89	14.07	27.05	99.21	82.35
50.35	31.59	193.66	8.92	52.8	62.74	16.31	38.09	11.85	90.95	4.3	49.43	31.12	13.03	82.52	70.27	224.41	9.68	41.75	85.15	31.31	123.3	115.18	210.33	10.19	34.79	93.41	54.76
57.59	33.03	107.15	8.44	48.07	57.36	30.83	50.42	9.22	158.49	10.63	172.03	18.3	5.82	165.49	164.36	255.67	10.12	38.76	99.31	64.29	64.56	56.05	147.13	8.53	15.64	86.81	38.09
35.05	17.84	58.93	12.91	127.93	50.9	30.27	68.9	39.74	164.39	10.25	36.18	57.68	24.18	28.18	9.89	97.21	7.03	33.7	35.11	10.18	64.64	40.2	215.85	11.25	58.46	62.2	18.63
54.73	48.11	132.3	10.65	20.87	87.92	36.37	35.78	21.01	75.08	5.44	36.15	58.73	27.99	44.96	12.93	156.01	9.79	54.97	28.76	8.29	57.82	32.06	128.58	8.19	35.36	55.45	24.94
34.54	5.76	82.47	6.61	52.36	16.68	6.99	43.18	19.11	170.9	11.94	44.02	44.25	11.18	73.5	68.17	197.7	9.23	21.08	92.75	34.48	146.64	135.48	177.5	6.02	37.83	92.39	76.33
116.73	105.31	164.25	6.84	38.47	90.21	64.11	41.52	16.8	93.58	6.67	38.52	40.48	17.96	45.39	18.12	99.1	6.84	54.4	39.93	18.29	57.38	29.86	213.33	10.53	53.65	52.04	14
56.96	1.27	201.68	16.9	127.84	2.22	0.63	136.61	133.31	239.63	9.62	29.35	97.59	55.63	72.16	53.64	222.69	11.43	44.02	74.34	24.09	24.79	12.94	65.97	4.17	36.39	52.2	19.62
60.33	57.93	197.97	11.91	18.74	96.03	29.26	63.93	56.07	108.64	8.99	34.49	87.69	51.6	132.4	123.31	264.15	10.04	31.34	93.13	46.68	102.2	98.52	178.49	9.14	17	96.4	55.2
122.51	120.05	197.74	8.81	28.81	97.99	60.71	54.16	32.84	165.16	12.92	54.27	60.65	19.89	164.29	163.12	235.71	8.61	43.52	99.29	69.2	38.8	4.58	96	6.6	48.71	11.81	4.77
51.32	32.02	143.44	10.16	23.12	62.4	22.33	41.95	7.42	164.15	8.28	38.08	17.68	4.52	124.36	116.73	242.98	11.21	29.24	93.87	48.04	45.9	26.41	153.84	12.16	19.71	57.53	17.17
86.47	36.53	241.56	18.86	48.15	42.24	15.12	58.87	37.44	159.17	10.9	21.26	63.6	23.52	67.51	26.42	152.87	10.32	31.68	39.13	17.28	154.09	151.85	204.12	9.29	32.01	98.55	74.39
55.53	43.71	138.49	8.94	16.21	78.72	31.57	32.65	18.06	77.06	6.1	102.98	55.29	23.43	158.44	138.18	216.22	10.9	32.01	87.21	63.91	58.37	26.26	125.77	8.18	40.36	45	20.88
117.6	113.78	257.6	9.29	30.61	96.75	44.17	123.05	115.55	217.76	9.15	21.08	93.9	53.06	75.79	52.32	219.02	15.61	48.96	69.04	23.89	51.02	2.35	99.08	7.24	44.71	4.61	2.37
119.35	115.29	218.95	8.12	30.27	96.6	52.65	43.1	10.26	201.37	11.17	83.25	23.8	5.09	60.2	49.59	216.78	11.15	31.64	82.38	22.88	129.59	123.46	209.56	8.44	28.3	95.27	58.92
52.93	18.35	131.58	7.39	56.44	34.67	13.95	123.27	111.87	188.11	7.45	22.8	90.75	59.47	81.37	76.46	205.96	14.61	22.44	93.97	37.12	42.24	17.41	111.11	11.52	24.68	41.23	15.67
49.03	22.17	135.45	10.53	33.4	45.22	16.37	154.47	151.23	224.08	10.99	26.05	97.9	67.49	30.42	11.82	88.82	7.26	73.37	38.86	13.31	45.12	14.72	96.08	7.54	34.75	32.63	15.32
44.81	23.66	87.11	5.98	27.78	52.81	27.17	93.06	63.84	155.13	8.7	18.62	68.59	41.15	33.55	25.62	129.1	11.02	32.22	76.36	19.84	54.61	44.6	183.16	9.99	25.75	81.68	24.35
65.51	53.48	199.58	11.81	26.44	81.64	26.8	113.72	108.84	202.46	10.04	21.32	95.71	53.76	54.53	18.69	189.68	11.53	53.5	34.27	9.85	156.35	154.94	191.33	5.22	41.96	99.1	80.98
55.33	53.45	228.43	11.65	17	96.6	23.4	153.61	148.76	288.98	9.88	35.08	96.84	51.48	85.8	84.62	125.15	7.51	33.32	98.63	67.61	82.87	76.89	215.1	11.14	34.39	92.79	35.75
45.14	37.24	200.02	12.46	20.4	82.5	18.62	28.67	9.66	90.36	7.41	54.27	33.71	10.7	39.92	15.54	85.15	6.54	49.98	38.94	18.25	71.9	56.17	111.19	9.87	102.98	78.12	50.51
63.65	55.24	207.24	9.8	32.64	86.78	26.65	55.16	50.46	188.01	9.42	16.9	91.47	26.84	71.05	13.48	143.79	11.48	37.83	18.97	9.37	55.43	39.62	240.18	27.54	43.52	71.47	16.49
62.82	37.47	174.65	12.05	34.79	59.64	21.45	33.72	15.19	74.73	5.45	40.63	45.03	20.32	88.97	71.08	191.69	15.42	30.51	79.89	37.08	84.71	77.56	215.13	9.59	23.23	91.56	36.05
34.31	15.67	88.02	6.4	58.2	45.67	17.8	34.5	32.28	110.6	3.66	51.58	93.55	29.18	57.79	32.64	152.3	11.29	51.41	56.48	21.43	112.38	110.06	156.8	7.01	22.01	97.93	70.19
68.23	63.33	206.88	8.29	30.6	92.83	30.61	71.67	38.82	226.29	13.55	39.41	54.17	17.16	128.39	125.58	211.37	10.05	29.58	97.81	59.41	69.54	55.47	220.39	10.76	25.45	79.76	25.17
54.24	27.62	243.63	12.11	59.84	50.91	11.34	98.47	92.92	203.45	9.73	16.51	94.37	45.67	63.45	53.93	158.92	13.16	25.16	84.98	33.93	76.67	28.25	179.72	10.55	58.48	36.85	15.72
71.81	60.65	220.63	8.09	40.12	84.47	27.49	86.43	80.74	159.39	8.56	15.64	93.42	50.66	65.15	55.21	204.56	9.77	46.77	84.74	26.99	101.27	98.4	170.94	10.34	27.51	97.17	57.56
64.11	47.33	155.05	8.06	28.16	73.82	30.52	79.28	60.35	184.38	9.67	29.92	76.12	32.73	163.19	148.72	232.73	16.1	29.58	91.13	63.9	24.57	10.03	51.33	5.99	42.74	40.83	19.54
86.1	80.48	187.03	8.41	23.8	93.46	43.03	40.58	35.15	125.96	10.96	14.28	86.62	27.91	22.95	13.33	60.62	9.58	52.93	58.09	21.99	80.36	69.75	201.67	16.51	38.27	86.8	34.59
45.05	12.25	162.4	11.72	58.05	27.19	7.54	42.94	16.08	85.87	7.07	42.84	37.46	18.73	61.66	37.19	167.67	8.46	53.4	60.31	22.18	69.1	63.77	163.99	9.53	19.23	92.29	38.89
45.2	33.5	102.91	8.03	29.17	74.11	32.55	102.82	95.26	132.66	3.87	47.31	92.64	71.8	26.05	14.83	47.78	3.39	38.52	56.95	31.05	130.26	123.95	173.38	8.28	26.02	95.15	71.49
69.87	65.09	175.62	10.01	14.61	93.15	37.06	38.56	11.51	83.5	6.13	70.61	29.86	13.79	66.51	38.06	144.27	12.81	36.61	57.23	26.38	33.81	13.45	83.63	12.58	37.4	39.78	16.08
63.11	45.09	238.93	13.14	57.12	71.45	18.87	68.48	65.76	179.8	9.94	16.32	96.03	36.57	63.36	61.45	193.37	9.26	24.48	96.99	31.78	91.35	86.28	149.49	7.87	16.9	94.45	57.72
67.11	37.68	220.12	17.07	47.46	56.15	17.12	55.78	52.24	127.83	9.29	15.64	93.64	40.87	72.76	67.63	166.9	10.73	14.28	92.95	40.52	42.49	29.36	184.13	12.66	41.75	69.1	15.95
79.29	49.76	218.2	9.93	37.4	62.75	22.8	159.73	147.5	247.29	18.94	30.26	92.34	59.65	135.56	126.56	287.48	12.05	37.83	93.36	44.02	76.53	40.78	169.37	12.49	52.93	53.29	24.08
75.75	72.81	124.15	6.16	13.6	96.12	58.64	80.55	65.84	200.78	23.37	26.52	81.74	32.79	38.61	17.24	78.73	4.46	37.83	44.65	21.9	73.78	72.15	200.66	11.26	21.12	97.8	35.96
103.16	90.88	210.93	10.32	29.24	88.1	43.09	34.87	6.86	93.64	5.5	61.9	19.67	7.32	83.25	77.05	159.3	9.18	15.86	92.56	48.37	55.51	46.47	179.93	8.9	42.16	83.72	25.83
77.5	56.63	181.07	13.15	16.51	73.07	31.28	18.27	6.31	42.08	2.73	51.06	34.52	14.98	82.89	80.07	205.53	9.89	29.92	96.6	38.96	70.17	64.02	170.36	10.13	20.66	91.24	37.58
48.88	26.67	166	13.14	19.04	54.55	16.06	93.23	91.24	153.84	10.36	28.53	97.86	59.3	40.23	18.19	85.57	5.64	50.21	45.23	21.26	75.67	50.92	193.57	10.84	39.66	67.3	26.31
64.64	35.23	184.97	11.06	44.88	54.51	19.05	150.58	146.78	254.89	8.67	38.94	97.48	57.59	154.14	153.29	225.43	8.5	40.66	99.44	68	110.42	109.02	184.28	10.56	27.2	98.73	59.16
92.66	89.93	181.32	8.79	22.44	97.05	49.6	112.73	104.61	189.91	7.82	24.64	92.79	55.08	93.35	91.18	186.31	10.16	19.21	97.68	48.94	73.42	61.95	178.86	9.22	34.68	84.38	34.64
48.63	9.25	114.32	11.68	83.92	19.03	8.09	42.37	11.2	83.69	21.23	41.48	26.42	13.38	67.38	64.54	184.4	11	20.4	95.78	35	67.38	12.39	108.04	6.37	46.13	18.39	11.47
86.9	84.14	170.14	12.59	23.12	96.82	49.45	143.08	131.84	234.59	11.5	34	92.15	56.2	90.49	88.09	197.57	9.1	24.07	97.35	44.59	29.08	8.42	108.68	7.28	70.72	28.95	7.74
33.89	9.51	101.97	9.88	56.32	28.07	9.33	28.41	12.71	82.64	4.32	50.32	44.73	15.38	25.35	10.16	78.74	7.89	74.28	40.07	12.9	53.9	19.77	150.63	15.2	14.28	36.67	13.12
52.86	30.38	119	9.32	30.26	57.46	25.53	61.07	50.86	190.72	9.17	28.86	83.28	26.67	144.03	136.59	226.06	8.23	30.6	94.83	60.42	15.54	4.98	43.6	3.98	81.6	32.05	11.43
50.92	24.56	114.44	8.31	45.05	48.23	21.46	42.34	16.73	153.63	10.08	74.97	39.52	10.89	107.98	99.87	188.03	9.06	21.76	92.49	53.11	54.49	32.48	168.06	10.75	42.64	59.6	19.32
41.08	10.05	79.31	11.09	21.08	24.46	12.67	135.23	127.62	199.41	11.01	30.6	94.37	64	108.21	100.75	185.26	7.71	33.48	93.11	54.38	49.81	28.53	149.2	10.31	51.68	57.27	19.12
84.73	70.36	186.08	10	29.58	83.03	37.81	78.91	76.89	94.85	3.49	24.76	97.44	81.06	41.29	13.57	92.61	7.7	42.54	32.86	14.65	55.37	40.15	205	9.99	40.83	72.51	19.58
66.59	58.98	220.18	10.4	45.05	88.58	26.79	80.43	73.55	215.86	10.77	20.4	91.45	34.07	46.64	25.96	155.77	11.53	44.88	55.67	16.67	81.9	77.84	134.13	7.56	20.2	95.04	58.03
55.8	28.45	153.26	8.97	57.77	50.97	18.56	77.13	69.78	194.88	11.46	17	90.46	35.8	52.74	27.07	140.92	9.29	44.71	51.33	19.21	48.03	42.61	129.43	8.05	24.64	88.71	32.92
99.3	91.05	157.93	7.16	18.3	91.7	57.65	64.73	61.91	230.9	12.34	24.48	95.64	26.81	75.46	69.36	163.65	9.97	14.28	91.92	42.38	126.64	108.52	225.23	18.55	20.22	85.69	48.18
22.45	9.36	53.25	4.57	47.46	41.68	17.57	43.97	13.13	120.99	28.01	337.27	29.87	10.85	49.59	15.02	97.79	7.34	55.61	30.28	15.36	61.41	58.24	146.58	9.03	17	94.84	39.74
82.33	63.4	293.56	11.55	57.73	77.01	21.6	161.84	160.23	243.35	9.68	34.71	99	65.84	56.26	33.69	137.53	8.81	48.57	59.89	24.5	103.23	98.01	171.06	9.65	17	94.94	57.29
145.54	129.57	246.85	11.05	31.96	89.03	52.49	52.96	40.37	190.61	10.81	39.44	76.22	21.18	81.99	80.69	130.3	8.83	16.32	98.42	61.93	72.37	67.93	159.63	11.71	17.51	93.87	42.56
70.5	26.74	151.95	17.38	32.33	37.93	17.6	60.3	56.34	150.53	10.04	26.59	93.42	37.42	93.7	87.84	179.74	8.3	26.14	93.75	48.87	134.32	131.26	208.1	8.54	33.01	97.72	63.07
75.37	56.29	199.04	13.67	43.33	74.68	28.28	58.56	53.1	152.79	9.54	23.12	90.68	34.75	126.95	120.2	247.26	10.33	29.92	94.69	48.61	40.39	2.86	98.12	6	90.44	7.09	2.92
72.3	69.19	210.58	10.05	21.57	95.69	32.86	66.63	63.98	227.53	9.95	32.64	96.03	28.12	79.96	77.84	214.8	8.66	24.76	97.34	36.24	54.82	37.12	207.96	12.63	46.62	67.71	17.85
83.57	76.16	225.29	10.58	32.64	91.13	33.81	124.08	119.77	223.19	10.08	30.98	96.52	53.66	112.37	105.2	173.01	8.5	20.42	93.63	60.81	55.35	28.03	204.93	12.04	48.28	50.64	13.68
43.88	23.34	93.79	9.46	49.64	53.19	24.89	78.32	62.35	301.37	9.39	38.93	79.61	20.69	107.93	70.85	254.79	12.67	36.88	65.65	27.81	58.29	50.34	203.88	11.41	22.44	86.36	24.69
56.89	46.79	211.61	11.42	44.02	82.24	22.11	95.35	92.43	168.98	6.91	32.64	96.94	54.7	53.26	15.08	174.08	11.11	55.9	28.32	8.66	130.89	121.2	207.91	16.29	34.39	92.59	58.29
26.85	8.43	57.35	7.71	29.24	31.4	14.7	63.04	15.36	217.39	11.73	60.82	24.36	7.06	59.19	52.18	227.74	11.11	29.92	88.16	22.91	56.83	35.49	173.61	11.11	38.52	62.46	20.44
33.86	6.69	78.49	6.47	63.24	19.75	8.52	113.15	104.86	199.45	8.58	20.87	92.67	52.57	16.84	6.54	53.87	4.2	76.35	38.83	12.14	80.41	74.81	161.23	11.18	46.08	93.03	46.4
44.47	30.77	109.79	7.95	39.66	69.2	28.03	112.53	105.41	230.35	8.7	29.49	93.67	45.76	38.8	11.47	99.81	5.45	39.66	29.55	11.49	28.16	0.28	69.58	15.9	310.88	0.99	0.4
55.49	24.01	118.06	9.31	58.46	43.27	20.34	140.86	139.66	247.11	10.47	40.12	99.15	56.52	101.44	96.91	187.06	13.52	23.8	95.54	51.81	91.06	85.56	147.53	9.74	34.09	93.96	57.99
151.71	147.54	260.45	9.57	37.4	97.25	56.65	65.08	55.39	191.07	10.37	40.87	85.12	28.99	51.66	36.77	150.39	9.3	30.27	71.17	24.45	19.11	10.43	52.67	3.99	52.8	54.59	19.8
28.81	15.54	80.06	5.38	128.44	53.95	19.41	69.89	54.53	234.76	9.69	44.88	78.02	23.23	76.79	73.51	161.85	10.45	15.64	95.73	45.42	91.97	89.85	159.55	8.99	23.39	97.7	56.31
61.74	8.6	160.44	9.47	44.71	13.93	5.36	49.88	38.82	141.62	8.91	26.52	77.81	27.41	79.3	65.72	177.21	8.72	29.92	82.88	37.08	135.11	129.49	197.93	8.61	32.38	95.84	65.42
77.25	74.19	207.51	9.49	17.68	96.04	35.75	74.53	73.24	162.73	9.13	21.08	98.27	45.01	124.82	120.79	288.24	11.11	33.79	96.77	41.9	133.93	128.24	195.2	12.53	34.59	95.75	65.7
50.67	39.37	127.96	10.46	24.93	77.7	30.77	66.71	34.72	130.91	7.86	40.58	52.05	26.52	49.19	1.35	137.8	17.09	179.52	2.75	0.98	50.46	1.31	161.48	20.83	640.49	2.59	0.81
19.93	8.66	82.61	5.69	31.98	43.47	10.48	115.24	108.19	203.66	9.99	23.79	93.89	53.12	133.7	129.09	203.69	10.03	32.22	96.55	63.38	89.35	85.32	166.58	9.22	21.82	95.5	51.22
43.07	30.11	194.17	9.89	38.08	69.9	15.51	33.75	14.57	82.92	5.74	40.2	43.18	17.57	151.8	139.01	250.68	12.28	36.04	91.57	55.45	133.54	119.3	182.54	15.54	34.31	89.34	65.35
85.35	63.87	206.02	11.81	41.48	74.83	31	131.43	124.68	245.06	30.84	21.76	94.86	50.88	40.45	24.17	123.1	11.48	59.14	59.76	19.64	137	133.8	196.97	9.3	36.45	97.66	67.93
33.29	11.05	71.84	6.59	54.34	33.19	15.38	105.01	101.9	204.56	10.87	37.57	97.04	49.82	58.6	55.94	130.27	6.57	11.56	95.46	42.94	91.97	90.26	185.69	9.77	29.92	98.14	48.61
20.73	6.26	64.98	6.5	79.79	30.21	9.64	81.77	77.77	116.37	4.48	49.64	95.11	66.83	110.8	107.04	207.66	9.57	29.58	96.61	51.54	49.17	8.46	139.17	11.57	64.11	17.21	6.08
44.38	17.12	118.3	8.56	32.33	38.57	14.47	62.65	49.41	155.6	12.13	13.92	78.86	31.75	99.63	95.19	181.53	8.46	29.92	95.55	52.44	124.21	74.58	235.41	9.92	29.21	60.04	31.68
56.56	39.24	252.22	10.3	59.12	69.37	15.56	141.98	129.51	281.71	11.78	38.76	91.22	45.97	45.54	25.52	93.47	6.48	43.65	56.04	27.3	38.41	32.06	134.38	14.17	14.39	83.45	23.86
89.6	85.15	256.91	11.6	23.39	95.04	33.14	27.07	11.93	98.6	4.95	34	44.08	12.1	24.9	7.73	62.69	8.85	35.9	31.06	12.34	73.18	64.77	201.6	11.51	30.95	88.5	32.13
57.88	14.92	116.8	8.84	86.36	25.78	12.77	39.18	8.62	102.89	6.49	70.97	22	8.38	143.94	139.04	197.41	9.48	33.48	96.6	70.43	81.89	80.02	172.88	10.08	16.32	97.72	46.29
49.35	28.46	176.36	8.46	67.49	57.67	16.14	64.1	6.84	111.62	8.11	66.8	10.67	6.13	70.76	63.55	168.83	9.77	17.68	89.81	37.64	55.17	47.04	185.81	9.72	34.91	85.25	25.32
41.65	33.29	91.13	6.92	25.84	79.93	36.53	110.31	104.39	200.72	9.91	25.16	94.63	52.01	108.71	103.55	163.34	7.49	21.94	95.25	63.4	51.6	27.75	144.85	16.97	29.24	53.77	19.16
51	20.86	146.99	10.63	50.21	40.9	14.19	67.58	47.63	184.57	11.92	14.28	70.47	25.8	50.26	24.41	141.2	11.99	24.07	48.57	17.29	77.78	71.91	206.18	8.18	32.7	92.46	34.88
34.93	10.29	92.84	10.85	52.96	29.46	11.09	81.73	71.48	196.82	12.74	21.76	87.46	36.32	100.74	96.33	126.96	4.05	32.38	95.62	75.87	109.86	104.37	171.92	9.45	25.74	95	60.71
39.92	19.99	92.07	8.99	25.74	50.08	21.72	106.15	104.4	187.19	11.63	31.81	98.34	55.77	51.66	24.45	186.97	9.38	55.08	47.32	13.08	54.64	46.75	96.17	6.37	30.6	85.57	48.62
58.27	22.07	162.6	11.11	17.1	37.88	13.57	32.7	7.43	70.6	6.91	76.16	22.72	10.52	163.94	161.54	242.79	11.68	34.68	98.53	66.53	96.11	73.47	127.52	6.21	38.76	76.44	57.61
31.32	13.54	109.73	10.14	39.42	43.22	12.34	36.61	11.19	126.07	8.8	60.68	30.56	8.87	135.8	41.68	144.16	7.73	4.08	30.69	28.91	62.13	57.27	170.13	10.57	21.57	92.18	33.66
153.49	149.29	280.27	9.14	31.31	97.26	53.27	102.07	95.15	190.96	11.64	22.53	93.21	49.83	52.24	46.55	96.18	7.55	33.04	89.12	48.4	30.06	8.84	72.05	5.21	43.26	29.42	12.27
83.7	61.7	167.47	4.86	51.51	73.72	36.84	32.55	9.89	87.79	10.33	88.73	30.38	11.26	65.29	61.14	197.63	9.88	17	93.65	30.94	89.49	84.9	191.47	10.82	17	94.88	44.34
137.87	131.78	248.63	8.98	36.45	95.58	53	146.37	139.95	236.2	9.06	34.39	95.61	59.25	124.57	121.45	210.03	10.89	26.59	97.5	57.83	38.81	17.88	112.68	10.63	51.49	46.08	15.87
51.02	38.31	117.34	8.66	31.96	75.09	32.65	26.3	17.73	87.65	6.56	46.08	67.43	20.23	76.55	5.08	140.3	8.97	63.24	6.64	3.62	77.68	63.36	184.18	9.02	26.75	81.57	34.4
33.73	29.27	81.71	4.28	28.16	86.77	35.82	70.72	35.04	154.52	9.02	38.72	49.55	22.68	93.33	89.02	133.84	5.91	37.4	95.39	66.52	90.54	86.09	203.3	11.02	27.11	95.08	42.35
40.5	28.36	131.39	10.29	47.31	70.03	21.59	53.45	26.77	155.41	10.45	45.92	50.08	17.22	53.7	6.79	112.05	7.24	56.39	12.64	6.06	126.16	121.49	228.97	9.82	25.45	96.3	53.06
45.43	39.4	150.6	7.07	33.7	86.73	26.16	48.05	33.89	136.61	9.74	39.44	70.55	24.81	50.6	33.45	186.57	11.74	39.2	66.11	17.93	40.87	34.14	103.03	10.73	32.01	83.54	33.14
57.05	32.72	227.65	11.52	41.75	57.35	14.37	147.45	144.08	241.93	9.56	32.64	97.72	59.55	28.46	23.2	60.2	3.54	44.2	81.5	38.54	75.86	50.13	229.88	12.22	36.88	66.07	21.81
43.47	8.78	82.69	5.95	73.92	20.19	10.61	29.36	11.06	95.66	10.58	45.56	37.67	11.56	54.64	46.46	189.05	10.72	28.89	85.04	24.58	34.69	11.17	109.91	6.71	38.99	32.19	10.16
32.25	9.94	107.5	11.39	14.96	30.82	9.25	28.88	20.18	68.41	3.92	42.16	69.89	29.5	47.96	3.54	115.74	23.55	139.94	7.38	3.06	91.49	87.1	142.42	7.16	18.3	95.2	61.15
67.66	36.57	189.76	11.61	35.49	54.05	19.27	122.47	116.38	254.1	9.55	29.58	95.03	45.8	57.25	51.15	120.78	9.66	10.32	89.34	42.35	104.17	98.66	190.35	7.97	33.09	94.7	51.83
66.46	64.36	165.29	9.54	13.92	96.85	38.94	61.05	45.93	129.33	11.37	20.66	75.23	35.51	64.26	59.95	131.81	12.89	14.28	93.29	45.48	51.72	48.65	105.29	5.52	15.82	94.07	46.21
77.15	75.26	156.22	7.93	15.64	97.55	48.17	133.28	128.19	211.74	11.31	27.51	96.18	60.54	28.79	9.86	70.96	4.3	55.71	34.25	13.89	57.48	8.83	97.3	5.62	43.14	15.36	9.07
13.88	7.06	40.07	3.61	40.13	50.84	17.61	44.95	23.7	139.8	8.88	62.62	52.72	16.95	79.78	74.18	192.92	10.52	20.42	92.98	38.45	72.43	7.69	128.81	11.09	39.89	10.62	5.97
54.32	46.17	181.95	7.66	24.48	84.99	25.37	65.59	47.05	215.52	23.39	17	71.73	21.83	77.65	70.64	165.17	9.58	19.23	90.98	42.77	31.63	20.2	65.65	4.2	29.58	63.86	30.77
55.24	47.44	247.72	10.15	27.2	85.88	19.15	72.68	64.24	187.52	8.99	43.33	88.38	34.26	110.28	95.85	211.25	18.72	26.75	86.92	45.37	98.37	91.24	197.23	12.91	29.58	92.76	46.26
34.55	10.9	89.27	6.21	46.92	31.56	12.21	75.64	68.03	176.48	10.52	25.05	89.95	38.55	31.19	11.15	77.59	7.68	51.99	35.76	14.38	24.45	9.92	82.78	6.8	90.47	40.58	11.98
118.31	113.11	274.22	10.39	24.35	95.61	41.25	78.48	26.93	232.53	18.55	47.71	34.31	11.58	18.27	4.53	55.01	5.63	74.28	24.79	8.24	85.74	82.34	164.77	10.93	17.81	96.03	49.97
74.3	71.33	192.27	11.13	20.4	96	37.1	57.47	41.19	193.99	10.97	63.32	71.68	21.24	46.5	8.89	163.12	10.85	87.04	19.12	5.45	56.55	54.53	195.51	9.8	23.39	96.43	27.89
20.56	5.17	64.43	6.21	57.09	25.14	8.02	73.01	69.13	90.15	4.09	34	94.69	76.69	93.67	91.84	160.96	9.99	20.4	98.05	57.06	32.26	17.96	84.33	14.32	33.4	55.68	21.3
103.41	99.34	186.12	11.46	19.21	96.07	53.37	47.67	9.06	150.55	12.04	48.15	19.02	6.02	120.31	113.63	191.72	10.08	26.82	94.45	59.27	68.12	63.23	103.09	8.87	39.41	92.82	61.34
68.26	43.24	168.46	18.64	27.46	63.34	25.67	51.84	18.24	123.98	9.71	44.88	35.18	14.71	144.87	138.07	238.94	11.5	29.92	95.31	57.79	38.33	28.07	110.41	7.5	47.87	73.23	25.43
45.93	11.78	122.27	7.96	29.58	25.66	9.64	135.84	133.96	186.42	8.45	29.58	98.61	71.86	45.8	25.65	169.68	12.72	61.25	56.01	15.12	65.68	34.79	198.26	11.74	44.02	52.97	17.55
49.42	40.25	181.79	10.76	27.83	81.45	22.14	81.25	79.51	192.8	9.49	17.88	97.85	41.24	61.32	55.19	180.45	9.77	46.35	90.01	30.59	40.03	27	91.01	12.43	59.14	67.45	29.67
50.39	23.62	124.06	10.54	66.8	46.87	19.04	122.02	120.64	165.34	9.59	27.73	98.87	72.96	50.61	26.52	129.04	8.43	32.7	52.4	20.55	61.11	52.09	134.39	6.32	42.24	85.24	38.76
51.93	47.35	79.98	3.34	37.14	91.19	59.2	126.85	121.04	188.23	8.85	29.92	95.43	64.31	57.94	17.38	118.9	8.37	26.14	29.99	14.62	39.6	6.02	84.48	4.59	57.35	15.21	7.13
46.35	29.79	132.07	9.24	24.07	64.27	22.56	66.67	62.5	240.81	9.41	25.16	93.74	25.95	18.56	6.8	44.72	4.07	44.88	36.66	15.21	74.27	71.74	105.16	5.09	36.57	96.6	68.22
44.32	14.62	121.24	10.61	65.28	32.99	12.06	52.32	43.5	185.81	12.57	27.2	83.14	23.41	149.01	141.99	230.35	8.39	30.95	95.29	61.64	57.44	53.89	102.72	8.36	13.6	93.81	52.46
51.59	38.52	209.14	11.03	36.72	74.67	18.42	74.5	67.12	184.69	10.23	22.96	90.1	36.34	31.43	15.17	99.01	6.5	24.48	48.25	15.32	46.49	21.79	101.79	3.88	53.65	46.88	21.41
50.82	20.4	125.38	10.76	51.68	40.15	16.27	73.13	52.62	122.38	4.64	40.58	71.95	43	41.25	28.91	152.19	8.87	45.59	70.08	18.99	83.27	72.4	219.58	9.88	48.28	86.95	32.97
166.48	164.38	255.2	10.53	39.21	98.74	64.41	109.39	106.93	190.18	8.84	30.27	97.75	56.23	51.19	12.26	141.42	22.98	62.52	23.96	8.67	62.96	53.08	216.92	10.74	32.38	84.3	24.47
29.23	5.45	79.42	7.35	40.8	18.65	6.86	48.17	15.45	142.91	14.86	63.92	32.08	10.81	29.13	6.79	102.52	8.09	59.84	23.29	6.62	41.07	39.2	66.32	2.44	41.75	95.46	59.11
86.14	78.86	242.47	11.3	23.23	91.55	32.52	136.44	128.89	208.11	8.2	25.16	94.47	61.93	60.5	42.97	234.12	14.01	55.35	71.03	18.35	46.53	21.92	146.15	9.4	50.21	47.11	15
41.42	27.94	139.59	11.39	24.64	67.46	20.02	160.98	156.4	250.05	11.5	36.72	97.16	62.55	60.61	56.7	125.88	3.72	51.58	93.55	45.04	24.55	8.39	71.45	4.06	31.38	34.18	11.74
64.27	55.86	183.55	9.81	14.96	86.91	30.43	56.19	21.81	119.17	7.72	54.63	38.8	18.3	77.1	39.23	176.28	9.54	30.95	50.89	22.26	14.61	6.06	45.53	3.9	34	41.48	13.31
19.8	9.41	63.36	3.73	38.02	47.52	14.85	81.95	79.8	208.2	11.16	27.2	97.38	38.33	45.86	23.22	142.64	10.87	24.51	50.63	16.28	88.81	82.15	140.7	4.97	43.33	92.5	58.38
82.06	79.27	180.09	15.61	19.23	96.6	44.02	46.78	17.78	126.7	8.82	44.2	38.01	14.03	67.06	49.52	201.06	10.14	51.58	73.84	24.63	53.32	31.37	210.28	14.2	53.65	58.83	14.92
86.7	82.67	189.3	8.91	20.18	95.36	43.67	79.18	69.06	199.99	8.96	26.36	87.22	34.53	44.78	30.14	168.44	17.42	28.56	67.3	17.89	112.43	108.39	251.95	9.63	29.58	96.41	43.02
50.58	14.29	200.78	12.39	94.92	28.25	7.12	139.78	131.93	190.35	9.3	26.14	94.39	69.31	46	10.34	193.45	11.04	106.76	22.49	5.35	25.85	10.81	92.13	6.48	50.77	41.83	11.74
90.84	83.51	203.02	11.82	25.05	91.93	41.13	42.92	40.91	61.84	2.43	35.26	95.3	66.14	47.77	19.59	96.42	8.29	23.51	41.02	20.32	141.35	137.16	244.87	7.95	35.36	97.03	56.01
135.58	131.95	217.6	11.58	27.68	97.32	60.64	37.04	12.43	101.39	9.96	31.34	33.56	12.26	32.09	13.14	96.9	10.2	32.7	40.96	13.57	171.93	169.8	206.84	6.83	42.6	98.76	82.09
122.76	114.65	199.47	8.94	26.44	93.4	57.48	146.14	138.35	240.09	10.16	38.76	94.67	57.62	64.58	31.11	115.94	5.82	39.44	48.17	26.83	32.49	20.4	86.06	5.85	29.58	62.78	23.7
80.76	69.76	247.48	14.88	37.64	86.39	28.19	60.85	56.39	221.9	12.14	16.58	92.67	25.41	30.56	4.6	86.09	18.45	225.44	15.05	5.34	106.16	69.01	154.52	11.41	43.52	65	44.66
54.22	28.94	227.53	10.73	50.58	53.38	12.72	96.35	88.27	186.98	10.11	16.95	91.62	47.21	39.65	22.33	89.93	11.09	25.93	56.3	24.83	79.24	75.52	224.24	11.9	23.51	95.31	33.68
83.83	81.89	230.48	9.97	21.32	97.69	35.53	85.46	79.39	154.59	11.92	16.9	92.9	51.35	21.73	14.48	79.33	5.35	31.08	66.66	18.26	97.5	91.84	176.81	8.97	23.8	94.19	51.94
51.86	29.49	124.68	8.08	36.88	56.86	23.65	42.72	17.95	94.47	8.03	37.87	42.02	19	59.11	42.52	191.23	10.89	38.86	71.92	22.23	126.12	118.22	186.83	9.11	31.31	93.74	63.28
95.53	92.14	128.44	5.11	40.12	96.45	71.73	145.69	84.53	254.61	18.9	37.74	58.02	33.2	179.05	177.83	279.41	10.23	38.52	99.32	63.65	142.46	138.47	227.7	8.26	31.68	97.2	60.81
141.26	135.22	233.09	8.2	32.54	95.72	58.01	31.46	8.62	75.89	5.52	68.68	27.38	11.35	27.56	6.3	49.23	4.29	62.73	22.88	12.81	98.73	93.44	233.72	10.11	35.08	94.65	39.98
45.38	33.87	188.08	10.68	41.09	74.63	18.01	93.75	90.65	112.48	5.1	42.16	96.69	80.59	46.65	28.14	104.68	9.44	47.31	60.33	26.89	13.44	8.46	120.66	4.83	76.35	62.93	7.01
34.05	5.59	73.98	6.62	54.97	16.4	7.55	111.1	99.4	154.29	5.95	20.63	89.47	64.42	103.9	93.82	225.32	11.7	21.12	90.3	41.64	129.4	118.37	309.49	20.15	27.88	91.47	38.25
69.22	65.65	109.21	7.31	11.26	94.84	60.11	113.43	107.51	173.05	8.06	22.44	94.78	62.13	41.6	14.75	84.54	8.03	53.58	35.46	17.45	117.74	116.06	233.27	7.58	30.26	98.57	49.75
106.74	99.64	176.87	9.72	21.08	93.35	56.34	53.84	27.26	195.08	10.17	52.8	50.63	13.98	65.88	62.59	125.09	7.15	30.61	95	50.04	113.67	110.88	193.01	9.11	21.68	97.54	57.45
71.91	65.9	170.87	8.66	23.23	91.64	38.57	117.91	109.41	223.63	9.13	24.07	92.79	48.92	28.95	8.73	60.41	4.08	49.4	30.15	14.45	122.69	115.93	246.92	15.63	20.4	94.49	46.95
40.08	5.07	118.85	6.09	34.09	12.66	4.27	44.39	26.03	70.54	3.33	38.52	58.65	36.91	52.01	34.88	144.22	11.34	38.01	67.05	24.18	87.3	41.16	228.76	15.31	22.01	47.14	17.99
33.03	13.35	85.12	12.28	89.76	40.42	15.68	56.59	34.52	171.86	13.11	26.52	61.01	20.09	45.06	39.64	173.1	11.87	26.47	87.97	22.9	133.94	127.37	249.45	8.49	42.64	95.09	51.06
46.23	31.58	180.39	9.51	59.15	68.31	17.51	115.49	110.3	204.86	9.84	21.08	95.51	53.84	55.69	51.65	141.67	10.21	28.89	92.74	36.46	37.48	18.34	116.95	9.52	85.97	48.94	15.68
83.61	77.98	173.62	7.65	23.12	93.26	44.92	156.2	147.99	285.25	9.66	33.01	94.75	51.88	69.79	17.41	162.2	11.56	63.36	24.95	10.73	138.38	133.8	225.22	8.17	32.7	96.69	59.41
72.42	52.68	180.89	10.11	34.39	72.74	29.12	17.88	7.91	47.15	2.65	46.08	44.23	16.77	46	26.31	106.61	10.36	38.63	57.2	24.68	36.56	12.94	83.7	6.06	32.64	35.39	15.46
83.38	80.77	156.07	8.84	15.13	96.88	51.76	113.72	110.67	139.4	5.17	29.24	97.32	79.39	65.53	64.32	115.24	7.16	15.64	98.16	55.81	120.62	117.13	186.7	10.05	28.05	97.1	62.74
96.83	86.56	244.58	11.8	29.24	89.4	35.39	140.71	137.57	248.66	9.2	32.01	97.77	55.32	77.02	52.38	146.72	17.22	24.55	68.01	35.7	143.69	140.05	253.02	11.72	31.96	97.47	55.35
64.72	51.51	231.18	10.59	33.01	79.58	22.28	48.21	31.84	189.25	11.84	68	66.04	16.83	32.58	13.75	78.46	7.24	48.96	42.21	17.53	112.79	106.72	215.21	11.08	20.66	94.62	49.59
54.46	34.19	189.38	15.18	50.1	62.78	18.05	25.87	8.37	81.37	10.42	118.99	32.37	10.29	140.98	136.78	247.45	8.91	35.08	97.03	55.28	67.9	32.2	152.94	8.17	42.64	47.42	21.05
38.8	11.7	63.99	4.77	30.26	30.14	18.28	74.69	71.22	173.02	8.96	15.86	95.35	41.16	67.15	62.74	231.2	12.7	34	93.44	27.14	73.35	69.39	228.94	12.77	25.16	94.6	30.31
86.46	26.24	194.11	11.65	75.66	30.35	13.52	82.06	74.4	247.93	11.29	34.31	90.67	30.01	31.95	12.46	103.22	6.37	47.87	39.01	12.07	136.75	133.39	246.53	9.31	31.64	97.54	54.11
50.66	33.99	123.83	10.23	25.97	67.11	27.45	14.2	12.47	34.88	2.53	28.89	87.81	35.75	82.86	81.06	216.18	9.98	24.07	97.83	37.5	132.24	126.5	194.42	8.54	30.26	95.66	65.06
109.97	104.47	141.67	11.27	37.31	95	73.74	133.02	119.8	325.07	23.56	30.95	90.06	36.85	51.43	48.64	161.14	9.2	13.6	94.57	30.19	113.76	110.62	180.36	9.26	26.05	97.24	61.33
35.04	5.35	71.66	6.18	40.12	15.27	7.47	133.65	128.41	208.43	8.86	29.92	96.08	61.61	32.82	8.15	62.22	5.65	84.32	24.85	13.1	142.04	137.5	257.92	11.01	35.74	96.8	53.31
93.05	45.79	242.4	27.47	33.7	49.21	18.89	52.97	38.7	180.06	10.49	40.12	73.06	21.49	78.12	70.05	214.23	10.1	23.79	89.67	32.7	131.94	126.56	203.11	9.59	23.12	95.93	62.31
80.27	76.2	205.53	9.28	32.33	94.92	37.07	49.62	20.78	115.12	9.07	45.76	41.87	18.05	27.6	18.02	96.78	8.05	33.4	65.3	18.62	139.62	132.77	265.54	10.43	35.36	95.09	50
71.01	66.55	153.75	8.35	26.23	93.72	43.28	70.22	61.01	190.1	10.61	26.52	86.89	32.1	77.54	57.63	239.77	11.18	56.4	74.33	24.04	140.77	133.36	214.76	11.53	31.68	94.74	62.1
30.99	8.89	126.3	6.69	73.75	28.69	7.04	65.85	35.06	224.38	11.44	52.36	53.24	15.63	104.73	99.05	186.48	9.49	23.8	94.58	53.12	52.5	14.69	172.95	12.22	79.55	27.98	8.49
17.96	8.04	48.32	4.11	43.33	44.79	16.64	70.66	65.93	180.27	7.83	31.28	93.31	36.57	57.48	29.27	159.12	11.4	35.77	50.91	18.39	69.24	50.74	184.25	7.89	44.51	73.28	27.54
168.34	162.22	231.6	10.86	40.36	96.36	70.04	61.93	21.69	164.43	23.1	54.78	35.03	13.19	52.92	10.24	132.59	14.1	66.2	19.34	7.72	134.84	131.51	184.36	9.13	27.2	97.53	71.33
163.36	160.76	251.47	10.68	39.44	98.41	63.93	128.04	120.85	203.42	9.06	25.74	94.39	59.41	72.97	67.21	169.74	10.86	21.12	92.11	39.6	136.28	131.52	245.33	10.25	28.67	96.51	53.61
50.83	43.74	186.88	6.48	41.96	86.05	23.4	57.48	43.88	115.58	9.38	35.33	76.33	37.96	72.82	70.7	281.87	8.82	33.01	97.09	25.08	21.28	7.14	73.09	4.95	59.84	33.53	9.76
58.13	41.08	179.2	12.11	44.53	70.67	22.93	113.32	104.57	205.63	9.26	20.4	92.28	50.85	15.77	11.67	47.61	2.87	39.44	73.99	24.51	71.63	67.5	143.48	5.17	53.72	94.23	47.04
153.17	147.1	268.9	9.09	37.83	96.04	54.71	19.64	3.83	71.29	5.05	76.16	19.5	5.37	44.95	34.26	132.15	9.03	29.92	76.2	25.92	18.17	11.87	63.59	14.03	28.56	65.33	18.67
44.22	32.59	178.61	12.27	30.27	73.72	18.25	69.32	58.44	215.84	9.64	40.8	84.3	27.08	53.42	27.96	127.25	9.53	39.44	52.33	21.97	80.9	77.83	138.33	6.45	47.46	96.21	56.27
27.43	9.62	115.72	6.89	70.72	35.07	8.31	49.72	25.15	231.07	9.56	54.4	50.59	10.88	29.11	11.52	82.64	5.65	42.9	39.57	13.94	139.31	134.35	267.85	11.46	31.61	96.44	50.16
102.75	98.91	197.05	10.49	22.44	96.27	50.2	85.97	74.05	243.88	19.2	19.72	86.14	30.36	64.38	49.84	160.71	11.29	38.08	77.42	31.01	24.4	20.28	45.54	2.69	41.3	83.09	44.52
78.09	76.27	169.56	9.43	15.31	97.67	44.98	44.38	28.71	146.64	11.88	19.26	64.68	19.58	134.54	129.7	245.93	9.26	38.96	96.4	52.74	26.61	5.15	63.57	12.72	248.13	19.35	8.1
111.08	105.99	174.98	9.35	23.12	95.42	60.57	133.15	129.99	239.64	9.4	29.51	97.63	54.24	84.73	70.38	136.91	7.89	38.08	83.06	51.41	136.41	123.14	203.44	9.65	26.05	90.27	60.53
38.79	32.35	162.9	10.37	19.43	83.41	19.86	31.88	27.81	139.73	8.44	11.97	87.22	19.9	25	8.46	93.61	5.47	54.21	33.86	9.04	38.78	21.66	159.2	12	29.24	55.86	13.61
42.94	31.62	115.89	8.04	25.64	73.65	27.29	115.17	112.3	270.79	12.86	37.57	97.5	41.47	38.3	6.89	93.8	7.13	45.12	17.99	7.34	71.43	67.95	205.14	11.22	15.64	95.13	33.12
69.51	50.01	225.18	10.75	38.76	71.94	22.21	33.54	16.76	118.37	10.18	43.65	49.98	14.16	31.16	16.14	103.86	8.88	41.96	51.79	15.54	131.73	129.3	173.69	7.17	22.16	98.16	74.45
71.38	68.58	131.17	21.21	24.48	96.07	52.28	66.35	21.99	139.53	13.69	48.96	33.15	15.76	115.17	64.68	255.83	15.47	39.44	56.16	25.28	73.04	60.95	123.84	5.2	49.52	83.44	49.21
154.4	145.11	243.1	8.82	36.04	93.98	59.69	128.43	125.56	236.01	8.81	32.33	97.76	53.2	68.51	0.27	160.23	20.66	574.58	0.4	0.17	26.34	1.9	129.07	10.19	200.89	7.2	1.47
82.78	75.47	199.04	10.25	17.4	91.17	37.92	50.88	16.21	78.09	5.18	32.7	31.85	20.75	57.81	38.93	218.04	9.54	53.72	67.34	17.85	51.28	44.26	108.33	8.59	34.39	86.31	40.86
38.16	28.28	87.79	5.67	32.33	74.12	32.22	29.73	19.25	86.94	6.06	61.88	64.74	22.14	94.11	90.68	136.89	6.84	38.76	96.35	66.25	39.09	14.85	97.98	8.38	50.21	38	15.16
32.79	17.18	83.17	7.29	68.68	52.38	20.66	26.4	11.89	61.96	5.41	68.78	45.05	19.19	56.05	38.19	132.1	8.41	36.18	68.14	28.91	66.01	59.04	182.31	11.65	35.62	89.44	32.38
160.55	147.95	231.2	27.04	40.58	92.15	63.99	114.11	111.69	257.01	8.61	26.75	97.88	43.46	39.06	19.7	74.43	3.76	50.07	50.43	26.46	71.51	62.92	253.99	14.52	25.84	87.98	24.77
94.18	91.44	206.58	10.44	20.4	97.09	44.26	109.63	106.89	260.07	8.68	26.75	97.5	41.1	84.82	72.73	237.13	10.59	35.65	85.75	30.67	78.71	34.75	148.63	8.1	45.56	44.15	23.38
93.89	88.42	221.32	9.76	33.7	94.17	39.95	149.17	138.3	267.05	11.2	33.96	92.72	51.79	40.82	36.64	83.25	5.43	38.77	89.77	44.02	56.18	49.23	205.33	13.07	23.8	87.63	23.97
59.29	49.07	100.57	13.05	137.98	82.76	48.79	142.8	139.28	255.46	9.23	39.2	97.54	54.52	67.91	21.46	155.32	23.52	40.58	31.61	13.82	126.21	124.74	225.74	10.02	32.33	98.83	55.26
89.05	80.57	190.89	18.65	18.09	90.48	42.21	105.35	104.14	241.33	11.22	41.27	98.85	43.15	37.29	12.08	174.39	9.08	72.91	32.41	6.93	104.13	96.83	191.51	18.35	19.48	92.99	50.56
57.14	37.41	202.41	11.35	67.49	65.46	18.48	115.39	111.95	196.6	8.5	32.33	97.01	56.94	73.89	64.31	227.01	13.31	30.26	87.04	28.33	100.19	96.49	189.62	11.32	18.09	96.3	50.89
22.52	0.69	63.38	5.25	56.21	3.08	1.09	131.92	128.61	258.69	11.69	36.72	97.49	49.72	136.77	130.82	211.24	7.24	33.7	95.65	61.93	67.75	61.76	193.26	10	20.42	91.16	31.96
64.39	56.8	230.55	10.85	41.05	88.21	24.64	145.79	140.87	223.61	8.62	36.88	96.62	63	142.81	129.82	272.11	10.39	37.31	90.91	47.71	46.13	24.77	108.98	8.79	21.76	53.7	22.73
74.25	69.93	185.02	8.89	19.72	94.18	37.79	115.68	112.58	208.67	9.82	37.14	97.32	53.95	57.39	30.81	165.92	12.95	50.9	53.68	18.57	152.55	141.48	235.71	10	33.01	92.74	60.02
104.86	100.79	209.1	7.98	25.45	96.12	48.2	63.42	54.3	182.88	11.62	32.64	85.63	29.69	68.2	64.88	223.75	13.37	23.8	95.13	29	65.96	43.33	223.45	9.59	55.08	65.7	19.39
23.14	0.89	51.23	5.19	75.33	3.84	1.74	147.96	146.93	245.21	10.44	39.66	99.3	59.92	167.15	18.25	443.62	22.22	137.36	10.92	4.11	90.81	85.76	180.03	7.9	20.67	94.43	47.63
73.64	70.64	162.29	10.15	17	95.93	43.53	133.21	132.1	228.02	11.58	39.21	99.16	57.93	123.71	120.59	253.86	8.75	29.24	97.48	47.5	56.17	48.28	126.13	9.52	18.79	85.95	38.28
60.64	57.25	160.7	8.59	20.4	94.41	35.62	153.4	150.53	205.29	7.33	37.31	98.12	73.32	207.2	15.87	441.63	21.73	81.45	7.66	3.59	51.86	37.02	144.37	9.46	28.46	71.39	25.64
110.47	101.65	187.83	9.45	21.12	92.01	54.12	129.74	124.64	232.06	12.21	36.88	96.07	53.71	59.79	53.96	246.16	10.34	36.04	90.26	21.92	64.89	49.02	234.28	11.89	51.68	75.55	20.92
115.98	112.54	208.57	8.09	21.97	97.03	53.96	50.85	30.65	205.52	10.98	54.97	60.28	14.91	114.71	105.68	181.62	9.99	24.76	92.13	58.19	63	44.46	242.52	10.24	64.01	70.58	18.33
37.74	32.12	75.69	3.95	27.51	85.1	42.43	74.75	62.49	186.44	9.51	50.79	83.61	33.52	24.48	9.03	65.17	6.65	23.12	36.91	13.86	144.82	137.98	257.34	26.94	33.88	95.27	53.62
150.78	146.78	240.95	7.85	34.09	97.35	60.92	116.32	114.19	264.91	9.08	27.51	98.17	43.11	47.32	33.32	115.74	8.27	34.68	70.4	28.79	114.14	109.84	219.02	11.22	19.95	96.23	50.15
65.49	55.69	215.54	11.73	14.96	85.04	25.84	47.58	30.47	108.27	8.57	24.48	64.05	28.15	130.25	124.74	157.54	5.25	35.77	95.77	79.18	16.39	9.95	55.72	4.81	50.79	60.72	17.86
100.54	94.46	194.25	11.4	27.2	93.95	48.63	141.54	139.97	273.26	10.05	39.89	98.89	51.22	128.29	125.56	217.55	7.52	31.28	97.87	57.71	29.77	8.24	60.88	5.2	26.82	27.69	13.54
46.21	42.34	75.73	4.44	46.24	91.62	55.91	159.51	157.81	275.98	11.8	43.33	98.93	57.18	45.96	14.1	177.43	11.09	75.48	30.67	7.94	63.82	54.22	174.45	10.07	43.83	84.96	31.08
63.21	59.01	186.01	12.43	14.96	93.36	31.73	120.52	116.52	248.29	11.71	34.19	96.69	46.93	60.73	38.71	132.21	11.8	19.71	63.75	29.28	88.6	77.13	197.95	6.74	46.77	87.06	38.96
76.42	69.01	197.61	14.93	21.89	90.3	34.92	152.37	146.36	275.43	8.66	40.58	96.05	53.14	80.66	78.56	222.04	9.01	30.75	97.4	35.38	73.53	65.63	132.12	5.32	55.02	89.26	49.68
69.17	61.44	189.6	11.5	25.16	88.82	32.4	42.45	14.25	182.3	9.96	78.41	33.58	7.82	132.92	129.13	198.74	7.02	35.77	97.15	64.97	139	134.08	237.36	11.11	31.28	96.47	56.49
119.6	72.81	256.11	30.94	24.48	60.88	28.43	107.42	106.04	193.7	7.82	30.6	98.72	54.74	129.87	127.92	223.63	10.94	36.04	98.5	57.2	54	36.48	178.63	12.25	36.04	67.54	20.42
134.33	90.29	235.45	15.43	33.01	67.21	38.35	129.36	126.82	240.51	9.72	31.64	98.03	52.73	26.7	1.21	81.65	18.82	155.72	4.52	1.48	113.46	111.12	236.5	8.88	24.76	97.94	46.99
31.62	21.24	62.82	6.37	21.97	67.17	33.81	116.61	113.28	187.98	8.81	21.12	97.14	60.26	121.21	83.89	232.33	15.49	36.96	69.21	36.11	25.89	9.35	75.99	6.41	130.48	36.13	12.31
72.93	60.55	170.71	8.84	31.34	83.03	35.47	106.05	95.79	165.88	10.47	24.07	90.32	57.74	130.07	124.41	214.97	10.31	33.01	95.65	57.87	90.86	52.02	157.16	6.69	35.08	57.25	33.1
63.45	53.57	170.09	12.63	28.56	84.44	31.5	118.74	115.72	196.54	10	22.44	97.46	58.88	40.44	1.84	101.84	16.35	118.76	4.54	1.8	127.43	123.47	230.97	13.07	32.7	96.9	53.46
66.63	56.37	130.39	11.62	38.76	84.6	43.23	109.31	105.07	133.29	7	41.49	96.11	78.83	119.21	112.48	252.67	12.43	25.16	94.36	44.52	57.45	32.96	127.97	7.97	35.62	57.37	25.76
119.19	110.63	269.85	11.05	30.95	92.81	41	160.8	159.61	231.79	11.45	29.17	99.26	68.86	88.1	80.26	205.9	7.63	34.19	91.1	38.98	31.58	1.73	98.95	14.45	198.09	5.47	1.74
93.51	82.97	158.19	10.19	50.79	88.73	52.45	146.82	144.53	252.21	10.16	39.89	98.44	57.3	15.89	8.46	50.52	5.02	124.59	53.28	16.75	25.91	6.63	68.55	4.04	70.84	25.6	9.67
42.53	19.09	165.35	8.92	52.54	44.89	11.55	29.09	13.64	73.87	15.19	69.46	46.9	18.47	81.57	78.34	177.56	9.06	14.28	96.04	44.12	71.09	65.59	126.47	6.33	43.33	92.26	51.86
22.8	4.59	67.83	12.85	133.42	20.12	6.76	122.08	119.67	233.9	8.36	34.64	98.03	51.16	146.05	131.11	243.82	10.96	35.36	89.77	53.77	49.26	44.86	84.15	3.8	43.01	91.06	53.31
66.27	51.9	167.74	18.5	28.21	78.31	30.94	126.61	123.83	238.96	10.14	29.22	97.81	51.82	117.06	113.14	223.02	11.69	32.33	96.65	50.73	78.2	73.98	143.31	11.74	13.6	94.61	51.63
52.39	7.89	103.97	8.1	34.09	15.05	7.58	50.21	33.2	202.55	11.15	67.32	66.12	16.39	134.62	127.41	272.19	13.03	34.52	94.64	46.81	75.93	69.89	137.55	12.72	52.09	92.05	50.81
47.6	36.69	165.18	13.09	23.8	77.08	22.21	157.87	154.51	293.53	11.78	44.2	97.87	52.64	138.68	135.42	236.29	9.15	26.13	97.65	57.31	94.95	93.24	133.29	6.59	41.27	98.2	69.95
60.77	32.96	134.87	15	93.24	54.24	24.44	29	23.5	102.18	4.84	40.36	81.03	22.99	103.36	99.74	271.58	12.48	33.01	96.5	36.73	70.24	35.31	185.16	11.24	37.14	50.27	19.07
41.95	17.52	119.25	9.05	58.1	41.76	14.69	138.52	136.15	254.95	9.03	37.4	98.29	53.4	123.81	121.07	210.87	10.57	26.7	97.78	57.41	150.25	146.22	238.5	9.52	40.15	97.31	61.31
50.92	41.92	102.67	5.94	41.96	82.34	40.83	45.98	38.78	160.65	9.66	24.48	84.34	24.14	16.81	12.45	58.41	2.92	45.64	74.05	21.31	131.16	129.65	242.01	11.41	41.53	98.85	53.57
85.98	79.57	205.62	10.5	30.6	92.55	38.7	92.86	84.4	96.5	3.17	34.39	90.89	87.46	161.89	146.15	270.91	16.43	30.26	90.28	53.95	92.54	86.39	177.54	11.23	16.99	93.36	48.66
51.4	24.74	218.75	11.53	65.34	48.13	11.31	45.51	19.73	182.03	11.07	68.78	43.34	10.84	73.31	53.54	189.09	13.14	28.56	73.04	28.32	41.15	13.03	92.01	5.92	63.92	31.65	14.16
130.91	126.06	228.88	8.73	35.08	96.3	55.08	137.4	131.4	237.49	8.35	32.01	95.64	55.33	135.34	133.72	155.93	4.28	44.2	98.8	85.75	94.17	83.55	133.41	5.21	45.39	88.73	62.63
63.89	54.01	202.29	12.8	19.04	84.53	26.7	116.38	114.6	242.86	15.07	32.15	98.48	47.19	78.6	65.02	206.43	13.27	22.44	82.72	31.5	56.42	36.37	199.2	11.24	38.27	64.46	18.26
145.56	131.19	243.56	10.67	32.33	90.13	53.87	72.24	65.12	284.87	13.42	36.61	90.14	22.86	78.09	75.82	131.66	5.53	38.08	97.09	57.59	130.99	125.54	262.67	10.67	36.04	95.84	47.8
85.08	57.3	245.28	11.86	27.88	67.35	23.36	37.96	15.25	122.7	9.82	79.32	40.16	12.43	143.28	139.99	259.05	7.48	41.05	97.71	54.04	160.61	158.91	223.25	10.89	37.11	98.94	71.18
47.88	25.58	184.82	12.84	39.42	53.43	13.84	58.19	48	202.75	13.66	29.58	82.49	23.67	159.58	156.5	195.33	5.37	40.12	98.07	80.12	100.97	96.93	195.56	9.81	21.08	96	49.57
73.2	66.49	127.95	7.11	30.6	90.83	51.97	66.16	55.93	135.55	10.27	19.51	84.53	41.26	134.97	128.75	251.74	11.59	37.83	95.39	51.14	146.93	139.17	245.83	9.21	33.32	94.72	56.61
54.53	38.52	151.99	13.98	30.95	70.64	25.34	69.66	59.56	130.28	12.55	14.96	85.5	45.71	129.76	71.25	235.11	16.75	25.34	54.91	30.3	34.44	9.23	115.45	8.5	64.65	26.81	8
55.84	20.34	126.87	12.67	54.34	36.43	16.03	46.72	2.39	129.17	5.8	75.48	5.12	1.85	127.12	116.82	263.43	11.4	38.76	91.89	44.34	73.9	43.33	198.45	12.09	37.31	58.64	21.84
142.58	134.04	243.28	9.95	35.77	94.01	55.1	99.47	98.67	124.89	4.51	34.09	99.19	79	49.65	10.37	164.71	10.31	72.22	20.88	6.29	119.16	117.5	233.28	10.05	29.58	98.61	50.37
75.11	71.14	198.19	10.35	24.48	94.72	35.9	151.1	146.31	257.83	7.5	37.83	96.83	56.75	72.45	67.61	151.19	11.01	17.95	93.31	44.72	48.69	36.43	171.11	12.03	34.3	74.82	21.29
98.91	95.73	234.65	9.24	39.2	96.79	40.8	61.37	55.87	174.55	10.52	14.28	91.04	32.01	12.55	2.48	61.96	5.06	184.59	19.73	3.99	134.78	130.19	259.28	9.38	34.79	96.59	50.21
27.82	11.7	78.33	7.1	89.76	42.04	14.93	145.91	137.07	232.09	9.37	31.64	93.94	59.06	69.95	62.92	141.1	22.03	52.96	89.95	44.59	110.1	105.29	242.5	18.32	21.08	95.63	43.42
43.93	15.04	90.86	6.62	52.36	34.25	16.56	126.21	121.2	274.58	12.41	34.68	96.03	44.14	31.86	2.03	130.06	11.3	108.04	6.36	1.56	137.99	129.32	255.22	9.12	29.92	93.72	50.67
75.66	68.03	199.55	6.65	50.32	89.92	34.09	143.61	140.68	228.05	8.3	39.2	97.96	61.69	103.49	98.86	249.5	16.96	31.68	95.53	39.62	125.56	123.55	222.19	10.93	26.75	98.4	55.6
17.88	16.99	37.75	2.11	29.24	95.01	45	53.58	50.04	193.3	9.91	13.92	93.39	25.89	64.3	55.38	173.39	9.66	28.86	86.12	31.94	107.25	105.27	233.81	8.82	31.64	98.16	45.03
105.41	100.83	163.8	7.74	22.44	95.65	61.56	167.87	166.25	283.43	11.46	42.05	99.03	58.65	61.82	48.64	112.9	3.1	55.76	78.68	43.08	102.35	101.2	257.9	10.07	27.88	98.88	39.24
45.97	28.1	135.22	9.81	31.96	61.13	20.78	27.72	23.03	85.65	4.02	33.09	83.08	26.89	74.21	44.49	155.74	11.48	27.88	59.95	28.56	68.14	33.9	188.4	11.44	45.76	49.75	17.99
25.3	18.35	50.17	3.06	39.66	72.53	36.58	43.36	12.07	115.33	11.02	89.41	27.84	10.47	143.67	142.52	239.72	10.46	32.64	99.2	59.46	86.11	80.76	230.12	9.89	20.25	93.79	35.1
68.05	35.08	220.29	12.09	41.27	51.54	15.92	151.22	149.33	247.51	9.92	41.96	98.75	60.33	114.54	103.03	208.89	10.64	38.76	89.95	49.32	122.25	118.97	208.16	8.62	34.68	97.32	57.16
83.69	80.84	158.87	8.87	33.7	96.6	50.88	23.97	9.2	51	3.92	52.96	38.38	18.04	51.77	41.07	198.27	10.6	38.27	79.33	20.71	132.28	127.62	276.35	11.26	38.52	96.48	46.18
135.09	130.44	257.14	11.01	38.96	96.56	50.73	43.73	9.11	164.63	10.79	85	20.83	5.53	58.79	47.06	212.78	12.2	44.17	80.05	22.12	67.62	56.15	136.65	8.38	48.01	83.03	41.09
32.47	9.75	80.58	6.46	35.49	30.02	12.1	156.81	155.4	244.79	10.32	32.09	99.1	63.48	136.07	131.76	251.64	11.29	31.72	96.84	52.36	64.58	47.03	242.74	10.16	58.48	72.83	19.37
94.48	91.89	203.14	9.75	20.94	97.26	45.24	124.56	121.33	228.41	12.6	38.47	97.41	53.12	149.42	140.53	326.26	23.67	34.68	94.05	43.07	59.04	43.28	172.82	8.23	34.39	73.31	25.04
119.22	117.62	221.07	11.89	23.71	98.66	53.2	24.36	17.86	49.6	9.75	93.9	73.31	36	72.29	70.32	182.18	12.26	20.87	97.27	38.6	80.06	76.88	186.73	9.47	17	96.02	41.17
62.65	54.96	205.01	11.79	38.96	87.73	26.81	75.24	72.73	163.83	9.12	38.52	96.67	44.39	40.6	13.81	93.96	7.66	36.18	34.01	14.7	42.05	13.65	116.61	9.34	41.43	32.46	11.7
111.31	109.51	233.37	10.89	37.4	98.38	46.93	59.64	37.11	209.27	9.86	63.92	62.22	17.73	136.03	131.58	278.61	9.73	36.33	96.73	47.23	113.38	106.15	232.91	10.73	26.82	93.62	45.58
127.24	123.51	199.55	7.68	28.89	97.07	61.89	31.85	15.26	103.66	9.35	50.32	47.93	14.72	53.87	40.99	163.75	8.47	38.68	76.1	25.03	115.04	112.08	243.4	10.64	31.64	97.43	46.05
120.82	118.52	243.57	11.93	36.65	98.1	48.66	125.23	117.72	204.67	4.8	52.96	94.01	57.52	128.11	124.83	234.87	10.42	31.64	97.44	53.15	54.64	36.52	209.46	11.01	58.43	66.83	17.44
146.06	141.86	282.76	8.25	34.39	97.13	50.17	148.9	143.71	222.61	8.68	35.77	96.52	64.56	160.53	156.53	286.69	11.71	44.71	97.5	54.6	31.2	10.22	166.72	7.51	65.08	32.75	6.13
42.47	28.14	144.92	9.84	40.36	66.25	19.42	168.06	164.73	277.66	11.08	43.83	98.02	59.33	79.8	76.85	131.15	6.5	18.57	96.31	58.6	72.78	5.96	94.99	4	22.27	8.19	6.28
49.28	15.17	174.69	12.27	73.59	30.78	8.68	19.19	5.81	45.57	5.08	61.21	30.29	12.76	78.28	70.94	115.17	4.83	48.15	90.62	61.59	120.74	118.64	166.08	10.1	22.27	98.26	71.44
49.8	23.51	222.68	8.59	89.76	47.21	10.56	63.67	44.55	181.28	11.99	42.64	69.97	24.57	154.63	152.76	187.24	10.24	24.64	98.79	81.58	113.04	111.94	179.77	8.44	27.51	99.03	62.27
104.4	101.18	245.93	10.36	43.33	96.91	41.14	147.19	145.86	247.09	10.49	38.61	99.1	59.03	41.66	23.87	194.05	11.85	63.96	57.29	12.3	99.7	93.39	189.66	12.1	17.1	93.68	49.24
149.73	149.41	199.32	6.81	40.57	99.79	74.96	152.72	148.71	241.61	13.43	38.52	97.38	61.55	52.67	22.74	84.17	13.25	46.77	43.17	27.02	128.71	102.41	266.32	14.18	31.64	79.56	38.45
109.04	107.4	160.35	9.02	19.72	98.49	66.98	104.22	17.05	188.16	16.01	78.73	16.36	9.06	136.26	134.43	193.7	10.22	27.98	98.66	69.4	51.11	13.05	99.42	4.74	25.05	25.54	13.13
33.08	29.18	137.32	9.53	27.2	88.2	21.25	100.03	92.72	213.63	8.4	29.24	92.69	43.4	145.86	133.69	254.04	10.24	35.2	91.66	52.63	61.45	6.95	117.25	6.6	91.12	11.3	5.92
130.52	129.79	246.65	12.02	37.14	99.44	52.62	114.78	109.2	311.16	9.96	29.57	95.13	35.09	11.23	5.77	23.63	9.06	148.17	51.42	24.44	130.95	127.29	187.13	11.2	27.14	97.2	68.02
28.1	14.45	73.43	4.38	48.28	51.42	19.68	88.19	86.17	229.18	8.74	25.93	97.72	37.6	39.98	11.36	81.67	8.29	22.44	28.4	13.91	102.23	99.02	253.89	9.56	25.05	96.86	39
55.49	52.14	126.53	11.43	11.32	93.96	41.21	44.56	20.79	127.22	7.3	54.67	46.67	16.35	72.9	69.69	101.68	3.78	42.84	95.61	68.54	129.6	125.44	262.35	9.9	33.7	96.79	47.81
44.15	30.77	208.67	10.63	57.77	69.7	14.75	79.66	69.45	124.22	7.78	34.97	87.18	55.91	147.45	136.32	287.69	10.44	35.77	92.45	47.38	113.89	110.02	248.94	9.9	30.62	96.6	44.19
59.77	16.42	102.89	5.37	50.69	27.48	15.96	59.96	33.25	196.23	13.32	41.05	55.46	16.95	142.44	135.87	244.74	11.6	31.68	95.38	55.51	68.56	63.85	203.32	12.92	15.13	93.13	31.4
132.01	127.59	276.81	12.83	38.52	96.65	46.09	43.62	31.63	185.89	11.45	27.88	72.52	17.02	150.58	133.4	287.4	10.22	35.36	88.59	46.42	133.57	131.94	218.41	10.79	29.92	98.78	60.41
152.81	147.98	233.94	10.74	40.12	96.84	63.26	135.58	127.95	269.06	9.57	36.45	94.38	47.56	55.33	34.64	230.14	11.74	59.84	62.62	15.05	44.25	26.89	142.55	9.89	45.85	60.77	18.86
29.73	7.26	65.22	5.51	63.32	24.4	11.12	143.38	137.76	241.68	16.72	33.79	96.08	57	127.93	124.35	258.66	10	36.88	97.2	48.08	137.14	128.1	265.25	10.5	40.13	93.4	48.29
55.42	40.75	168.95	11.94	38.27	73.53	24.12	61.6	43.03	186.25	13.14	46.92	69.85	23.11	158.39	132.14	266.56	15.88	37.14	83.43	49.57	56.37	13.2	108.41	9.43	29.13	23.42	12.18
24.11	11.09	61.02	5.81	46.77	45.99	18.17	30	20.67	82.54	8.78	42.84	68.88	25.04	42.87	39.67	83.86	8.15	14.13	92.53	47.3	133.94	129.36	258.1	7.82	29.92	96.58	50.12
75.35	24.89	92.25	3.28	36.45	33.03	26.98	105.74	103.79	222.88	10.96	36.45	98.16	46.57	72.04	70.01	99.96	5.32	22.44	97.19	70.04	128.77	123.93	270.16	10.26	23.8	96.24	45.87
45.75	19.13	165.81	30.09	155.58	41.82	11.54	52.86	39.23	201.93	10.35	30.6	74.22	19.43	146.92	140.61	249.05	8.92	38.52	95.71	56.46	82.69	76.57	225.28	9.93	28.16	92.6	33.99
134.19	132.88	174.65	11.07	28.53	99.02	76.08	39.73	6.35	151.46	6.7	189.86	15.98	4.19	138.1	131.47	242.28	11.25	36.45	95.2	54.26	94.03	83.74	266.64	17.88	33.7	89.06	31.41
60.25	44.39	148.91	9.46	39.66	73.68	29.81	107.8	103.45	195.26	9.53	22.96	95.96	52.98	56.53	43.16	152.92	11.63	46.62	76.36	28.23	42.96	29.94	90.54	13.59	116.2	69.69	33.07
96.42	93.21	150.31	10.04	17	96.67	62.01	121.4	113.5	217.91	8.73	25.34	93.49	52.09	98.95	57.72	159.91	10.29	34.09	58.33	36.09	58.69	56.69	195.37	9.69	15.64	96.59	29.02
90.9	78.7	131.28	20.84	39.89	86.59	59.95	100.25	94.76	212.29	10.73	23.23	94.52	44.64	125.02	116.69	226	10.7	34.39	93.34	51.64	70.69	67.18	141.93	8.66	24.48	95.04	47.34
57.79	55.55	108.6	7.32	42.63	96.11	51.15	119.38	114.94	199.95	12.02	36.61	96.28	57.48	29.55	11.95	93.88	7.45	72.22	40.45	12.73	145.67	137.01	265.78	19.07	31.61	94.06	51.55
36.04	13.87	111.5	8.83	76.84	38.49	12.44	111.81	107.35	179.28	10.83	25.45	96.01	59.88	79.07	75.24	166.53	9.06	17	95.15	45.18	36.68	20.65	84.76	6.76	25.84	56.3	24.36
106.92	104.19	269.16	10.61	34.39	97.44	38.71	141.69	134.02	204.52	18.91	27.2	94.59	65.53	65.94	62.19	121.5	8.71	14.96	94.31	51.18	27.66	5.38	106.11	8.6	110.84	19.46	5.07
52.01	22.1	188.71	21.43	67.58	42.5	11.71	124.21	112.23	240.1	10.97	25.34	90.36	46.74	86.24	80.48	250.64	8.57	22.44	93.32	32.11	103.25	97.04	267.56	11.41	25.45	93.98	36.27
137.41	136.05	218.21	9.49	36.88	99.01	62.35	112.2	101.02	247.56	19.26	23.12	90.03	40.81	63.16	54.7	210.79	9.34	23.8	86.61	25.95	94.52	89.9	210.77	8.91	21.08	95.11	42.65
35	21.06	86.14	9.35	35.29	60.16	24.44	89.47	81.94	253.12	13.05	39.89	91.58	32.37	54.52	39.22	158.97	9.53	32.33	71.94	24.67	96.15	85.77	158.06	8.8	29.92	89.21	54.27
141.4	134.38	223	9.74	31.96	95.03	60.26	145.97	140.72	189.49	10.6	22.72	96.4	74.26	56.7	19.74	90.72	4.48	27.88	34.82	21.76	126.83	120.73	244.96	8.7	31.31	95.19	49.28
134.42	132.51	272.53	8.49	39.89	98.58	48.62	99.05	97.19	226.75	10.13	31.64	98.12	42.86	49.26	17.72	158.03	10.72	66.17	35.96	11.21	84.39	78.54	176.94	10.14	31.96	93.06	44.39
126.11	123.22	172.66	12.49	20.19	97.7	71.36	65.63	19.33	124.43	14.09	42.84	29.45	15.53	13.9	6.88	44.91	3.3	76.54	49.47	15.31	39.41	14.99	128.64	8.41	48.01	38.03	11.65
91.98	87.33	244.79	11.05	24.22	94.95	35.67	71.69	66.49	208.41	10.52	21.32	92.74	31.9	106.32	102.81	247	10.23	27.2	96.7	41.62	6.3	3.38	18.99	1.23	66.57	53.61	17.79
52.96	22.41	145.6	10.18	66.03	42.32	15.39	28.56	6.97	102.86	5.69	72.48	24.39	6.77	102.16	101.32	222.44	9.48	24.35	99.18	45.55	39.12	12.65	130.27	10.5	70.4	32.32	9.71
67.54	56.51	219.43	10.55	36.72	83.67	25.75	107.34	100.22	250.67	12.56	32.01	93.37	39.98	111.49	106.61	244.18	11.5	35.9	95.62	43.66	126.03	122.71	197.62	9.8	21.97	97.36	62.09
43	8.8	122.99	12.57	46.67	20.46	7.15	45.22	18.04	156.76	11.65	64.65	39.89	11.51	53.23	20.01	136.81	12.39	27.2	37.58	14.62	76.44	72.88	188.93	10.42	16.32	95.35	38.58
119.2	116.39	208.22	9.85	19.72	97.64	55.9	112.76	108.61	187.65	7.91	23.12	96.32	57.88	109.02	105.78	249.42	9.91	30.95	97.03	42.41	86.3	84.14	168.34	8.31	24.76	97.49	49.98
69.48	54.18	260.49	11.54	48.28	77.98	20.8	92.06	86.69	204.99	8.79	22.44	94.18	42.29	134.69	133.09	242.39	10.01	35.67	98.82	54.91	136.11	133.92	236.43	10.52	43.33	98.39	56.64
97.88	88.6	215.62	9.67	33.32	90.52	41.09	108.65	106.04	179.41	9.17	33.79	97.6	59.11	110.34	108.46	228.7	9.52	32.33	98.29	47.42	105.17	97.68	227.97	10.13	23.23	92.88	42.85
99.97	97.5	207.84	11.71	27.51	97.54	46.91	36.83	6.06	120.3	9.31	46.24	16.47	5.04	107.45	100.44	217.22	16.16	35.31	93.47	46.24	111.07	109.08	157.54	5.29	40.8	98.21	69.24
95.21	90.28	161.06	10.84	17	94.82	56.05	127.5	121.89	225.17	9.82	37.83	95.6	54.13	128.67	124.24	270.47	12.83	31.31	96.56	45.94	47.51	23.04	192.09	10.25	39.44	48.49	11.99
110.76	108.45	224.55	9.68	22.96	97.91	48.3	33.99	10.16	65.65	7.05	41.48	29.9	15.48	77.22	73.68	212.11	9.85	16.58	95.41	34.73	137.6	132.85	271.13	10.53	37.83	96.55	49
115.6	107.79	265.57	9.37	27.46	93.24	40.59	103.24	100.03	217.56	9.09	25.84	96.9	45.98	45.56	13.34	174.81	11.54	71.53	29.27	7.63	128.37	121.1	241.18	7.8	29.92	94.34	50.21
63.69	57.75	89.13	3.5	51.29	90.67	64.79	144.14	138.79	242.2	8.56	39.44	96.29	57.31	135.26	133.36	216.15	11.53	37.14	98.59	61.7	57.3	2.54	172.95	13.96	64.44	4.44	1.47
107.24	103.74	226.93	10.47	25.45	96.74	45.71	137.74	133.41	282.3	10.05	29.11	96.86	47.26	111.8	109.83	223.88	9.85	24.76	98.24	49.06	94.45	79.79	289.35	13.56	20.4	84.47	27.57
110.22	102.83	248.49	12.26	22.96	93.29	41.38	62.03	54.76	202.27	11.3	44.02	88.29	27.07	68.16	41.49	165.06	15.21	23.79	60.88	25.14	74.86	70.14	108.45	5.07	42.64	93.7	64.68
85.62	82.88	195.94	9.87	19.48	96.8	42.3	51.49	17.57	209.38	12.77	72.03	34.13	8.39	107.72	104.75	180.21	10.07	23.94	97.25	58.13	38.92	17.83	150.05	7.79	69.36	45.82	11.88
84.94	81.29	163.28	12.26	28.21	95.71	49.79	133.5	123.75	261.43	10.31	37.57	92.7	47.34	54.15	42.41	183.08	8.71	25.64	78.32	23.16	159.52	150.67	272.7	9.47	39.2	94.45	55.25
58.17	40.07	230.25	12.62	43.78	68.88	17.4	94.23	67.76	193.9	15.67	37.83	71.9	34.94	63.12	10.6	139.18	22.67	40.76	16.8	7.62	128.93	122.99	227.62	11.9	35.08	95.39	54.03
119.94	116.78	298.43	10.39	27.14	97.36	39.13	70.58	44.66	204.83	10.66	40.8	63.27	21.8	44.6	14.91	189.61	13.16	90.19	33.43	7.87	15.95	11.11	43.96	4.3	41.09	69.63	25.27
149.8	147.79	209.43	8.78	27.02	98.66	70.57	119.16	113.58	244.58	11.02	28.53	95.31	46.44	96.64	91.08	192.94	12.43	19.71	94.25	47.21	101.45	99.63	240.57	11.54	33.4	98.21	41.42
60.32	38.28	232.05	11.16	47.87	63.46	16.5	123.67	120.23	250.99	8.03	30.61	97.22	47.9	116.29	111.21	241.89	10.49	31.31	95.63	45.98	115.72	111.34	247.86	10.21	43.33	96.22	44.92
146.36	139.32	237.44	10.03	34.39	95.19	58.68	130.54	128.08	259.52	11.97	31.96	98.12	49.35	141.44	136.91	253.87	10.56	33.32	96.8	53.93	136.45	134.15	213.44	9.61	39.47	98.32	62.85
37.06	14.2	74.53	5.99	46.77	38.31	19.05	108.59	100.96	251.22	9.37	23.8	92.97	40.19	105.46	103.62	253.66	12.24	31.31	98.26	40.85	101.85	73.49	162.2	9.09	37.57	72.16	45.31
117.34	113.91	220.43	9.53	31.64	97.07	51.68	128.21	126.25	226.26	9.81	32.64	98.47	55.8	114.22	107.25	244.8	26.68	36.04	93.89	43.81	73.34	66.56	178.61	10.26	30.95	90.76	37.27
45.12	11.87	69.03	4.93	50.9	26.31	17.2	34.49	8.83	104.64	8.09	70.04	25.6	8.44	159.65	154.63	242.97	7.34	33.09	96.86	63.64	84.88	76.64	226.72	11.61	25.34	90.29	33.8
34.79	7.47	66.54	8.84	57.06	21.48	11.23	71.11	45.56	219.59	11.6	52.18	64.06	20.75	93.36	91.12	231.28	8.88	22.96	97.6	39.4	139.82	138.59	232.38	10.7	34.06	99.12	59.64
67.03	52.56	172.96	14.25	38.08	78.41	30.39	104.67	98.07	252.85	9.24	27.14	93.7	38.79	91.19	90.33	142.65	9.35	24.48	99.05	63.32	118.45	74.85	193.51	17.06	24.86	63.19	38.68
99.63	57.16	196.76	12.73	36.04	57.37	29.05	86.03	76.61	226.93	9.27	37.14	89.05	33.76	108.21	104.7	243.29	18.78	21.76	96.75	43.04	159.14	156.47	277.75	9.22	42.84	98.32	56.33
111.41	105.74	252.08	8.57	25.45	94.91	41.95	117.81	112.08	328.63	11.49	31.31	95.14	34.11	123.56	119.71	250.77	9.36	28.34	96.88	47.74	140.07	129.46	250.3	11.5	37.14	92.42	51.72
93.31	88.21	202.73	9.39	23.23	94.54	43.51	125.22	31.92	266.22	26.58	26.02	25.49	11.99	113.27	106.39	198.08	9.93	29.57	93.93	53.71	119.36	116.23	212.08	11.03	40.18	97.38	54.81
109.05	105.9	199.32	8.26	21.57	97.11	53.13	137.42	134.95	242.39	10.05	35.12	98.2	55.67	66.9	57.35	203	10.31	21.37	85.72	28.25	69.91	63.94	204	10.3	45.56	91.46	31.34
56.66	41.63	137.88	7.95	30.6	73.46	30.19	64.52	27.3	249.92	11.78	79.78	42.3	10.92	90.52	86.66	230.78	9.38	31.12	95.74	37.55	160.97	156.34	262.32	10.39	36.72	97.13	59.6
112.12	107.42	231.13	10.32	26.14	95.81	46.48	124.86	120.43	214.58	7.94	24.93	96.45	56.12	99.56	94.35	206.31	10.04	19.26	94.77	45.73	137.44	135.47	230.2	9.6	42.24	98.56	58.85
93.08	75.6	212.33	17.86	22.8	81.23	35.61	74.51	67.84	132.76	6.86	44.51	91.04	51.1	66.65	49.41	181.65	11.34	15.64	74.13	27.2	135.07	131.17	254.41	9.75	27.88	97.11	51.56
81.04	69.22	249.67	10.8	32.7	85.42	27.72	37.6	30.6	82.31	4.45	32.33	81.39	37.18	26.59	16.37	62.12	4.04	33.75	61.58	26.36	169.72	166.88	264.29	10.49	36.77	98.33	63.14
116.97	110.29	213.73	7.81	28.84	94.29	51.6	48.59	28.81	218.5	9.95	53.43	59.29	13.19	69.29	61.44	219.76	9.32	26.52	88.67	27.96	53.5	21.95	209.73	10.56	90.44	41.03	10.47
169.91	155.82	358.19	17.71	33.32	91.71	43.5	112.57	109.23	163.2	9.51	23.23	97.03	66.93	32.97	29.49	81.8	5.18	27.07	89.45	36.06	48.93	31.85	168.4	12.89	23.66	65.09	18.91
116.15	111.55	234.77	9.97	29.58	96.04	47.52	122.35	116.03	198.11	9.28	25.45	94.84	58.57	102.47	99.2	241.25	10.61	26.14	96.81	41.12	156.58	148.86	254.78	14	33.71	95.07	58.43
99.29	78.05	174.84	9.96	35.77	78.6	44.64	139.93	136.81	167.49	6.53	25.84	97.77	81.68	44.14	20.81	102.17	7.94	33.01	47.13	20.36	124.03	121.13	252.38	10.31	35.77	97.66	47.99
121.83	117.63	238.95	9.9	25.74	96.56	49.23	72.99	69.86	128.55	5.33	44.88	95.71	54.34	51.93	18.98	206.96	11.65	72.51	36.55	9.17	105.74	100.69	203.58	8.53	26.52	95.22	49.46
60.84	44.06	182	9.4	25.34	72.42	24.21	128.32	82.03	237.63	13.04	32.64	63.93	34.52	55.76	51.76	101.63	8.87	24.08	92.83	50.93	131.76	129.35	258.6	18.44	37.22	98.17	50.02
110.97	104.14	213.33	7.85	25.34	93.85	48.82	139.85	130.16	270.64	8.67	35.49	93.07	48.09	136.93	135.65	213	9.78	32.33	99.07	63.68	142.11	138.28	236.8	10.52	41.48	97.31	58.4
59.11	47.32	220.28	10.39	25.84	80.06	21.48	44.03	15.47	96.36	5.97	49.23	35.14	16.06	106.77	101.9	201.72	9.67	37.72	95.44	50.52	48.22	35.67	125.3	10.07	26.52	73.96	28.46
133.98	127.2	257.28	9.45	29.22	94.94	49.44	76.15	73.71	112.42	4.47	20.4	96.79	65.57	104.02	101.49	190.11	9.18	24.51	97.57	53.38	96.86	92.7	200.73	8.39	21.08	95.7	46.18
27.02	9.75	64.85	9.57	62.65	36.08	15.03	89.89	81.13	256.16	10.52	33.09	90.25	31.67	116.79	115.37	220.99	9.93	29.09	98.78	52.2	141.96	135.84	229.38	10.21	31.81	95.69	59.22
127.27	111.96	245.82	11.28	29.24	87.97	45.55	77.77	75.29	122.85	4.61	44.71	96.81	61.28	129.21	124.02	195.02	22.13	25.05	95.98	63.59	126.56	87.68	203.94	16.11	36.88	69.28	42.99
140.08	130.1	233.18	9.29	31.31	92.88	55.8	133.17	127	211.78	10.98	28.56	95.36	59.97	62.04	39.9	157.83	7.02	61.21	64.31	25.28	122.37	113.79	263.15	11.71	32.79	92.99	43.24
123.26	119.97	255.31	9.51	34.68	97.32	46.99	122.94	120.4	226.66	9.65	34.09	97.93	53.12	97.05	93.04	210.71	9.45	19.26	95.87	44.16	132.95	123.05	246.4	9.25	28.81	92.55	49.94
119.03	104.65	265.85	13.41	33.32	87.93	39.37	93.71	90.3	233.81	10.8	19.72	96.36	38.62	29.28	13.9	88.02	31.3	166.69	47.47	15.79	86.02	77.09	112.87	2.94	44.7	89.62	68.3
77.99	73.32	230.85	13.1	28.89	94.02	31.76	71.05	60.13	232.22	9.42	39.44	84.63	25.89	53.96	31.29	159	15.94	75.35	57.99	19.68	150.13	144.62	254.4	9.12	31.64	96.33	56.85
119.78	114.8	263.98	11.51	30.95	95.84	43.49	96.3	93.54	209.74	9.65	29.22	97.14	44.6	49.44	36.14	149.48	11.6	35.4	73.1	24.18	99.87	95.21	134.44	5.97	30.95	95.33	70.82
134.99	131.86	194.07	6.59	29.92	97.68	67.95	150.21	144.73	225.44	12.65	32.44	96.35	64.2	124.9	121.48	188.45	9.51	27.27	97.27	64.46	35.84	24.8	102.56	12.01	68.88	69.21	24.19
104.98	99.1	168.5	10.28	19.04	94.4	58.82	109.91	104.7	176.53	9.45	22.01	95.26	59.31	77.52	70.25	268.3	12.09	29.24	90.62	26.18	117.51	104.69	197.02	11.85	59.84	89.09	53.14
135.53	131.01	233.06	9.08	33.04	96.67	56.21	63.6	38.05	149.46	9.03	34.69	59.83	25.46	102.23	100.26	209.32	11.17	38.96	98.07	47.9	115.27	111.39	291.92	10.32	29.44	96.64	38.16
114.3	63.15	243.53	17.15	32.64	55.25	25.93	91.49	88.36	157.41	11.03	19.26	96.59	56.13	82.59	72.16	196.37	10.86	17.68	87.38	36.75	142.91	133.83	265.33	15.48	26.11	93.65	50.44
43.13	17.08	134.28	8.07	56.4	39.59	12.72	64.25	42.98	216.06	15.11	47.73	66.89	19.89	89.18	85.92	198.01	10.69	19.72	96.34	43.39	144.01	134.98	242.27	10.94	34.68	93.74	55.72
44.84	13.41	97.01	6.42	44.71	29.9	13.82	75.6	70.2	175.37	10.49	20.91	92.86	40.03	37.55	9.99	80.74	5.28	94.23	26.61	12.37	45.48	39.52	81.28	2.59	50.21	86.89	48.62
89.97	83.86	179.92	8.66	15.88	93.21	46.61	60.85	55.12	168.38	12.42	25.16	90.58	32.73	85.78	82.45	194.48	7.98	16	96.12	42.4	91.2	88.65	125.01	6.58	36.18	97.2	70.92
38.3	7.6	109.74	13.87	143.75	19.84	6.92	112	91.82	174.15	5.17	53.04	81.98	52.72	138.51	132.83	256.08	9.71	35.49	95.9	51.87	65.73	49.29	230.72	11.03	40.83	74.98	21.36
127.66	123.07	249.33	9.38	27.86	96.41	49.36	97.72	84.67	156.95	5.34	49.52	86.65	53.95	122.37	121.39	175.42	8.47	30.95	99.2	69.2	74.49	51.82	198.86	11.66	50.32	69.57	26.06
110.04	103.26	229.58	9.03	22.44	93.84	44.98	20.57	10.66	76.25	4.98	42.84	51.81	13.98	111.15	106.42	248.29	11.79	26.52	95.74	42.86	40.69	14.76	174.56	8.89	56.36	36.27	8.46
39.78	14.34	156.81	9.79	62.59	36.05	9.15	120.58	112.38	188.33	7.76	32.7	93.2	59.67	125.47	123.68	226.81	10.68	25.84	98.57	54.53	117.02	105.79	149.47	3.69	36.37	90.41	70.78
134.63	133.48	206.99	9.99	42.84	99.14	64.48	42.17	33.06	83.04	14.19	65.4	78.39	39.81	131.07	127.88	253.91	10.8	36.88	97.57	50.37	129.12	122.53	202.47	10.54	28.56	94.9	60.52
132.97	127.35	322.26	10.53	28.56	95.78	39.52	98.22	94.85	205.11	10.11	44.2	96.56	46.24	94.92	90.69	256.39	9.74	23.12	95.54	35.37	26.98	7.12	69.79	4.51	64.01	26.39	10.2
126.68	125.57	239.79	9.85	27.2	99.12	52.37	128.27	125.46	170.39	5.46	38.17	97.81	73.63	48.59	3.21	91.29	6.62	89.08	6.6	3.51	133.15	130.62	183.78	8.84	33.01	98.1	71.07
71.99	69.87	177.39	10.11	13.6	97.05	39.39	144.81	142.75	223.91	9.87	30.95	98.58	63.75	139.06	133.77	262.11	8.35	31.31	96.19	51.04	52.51	44.65	71.03	4.52	30.6	85.02	62.85
96.67	93.69	235.05	9.77	23.23	96.93	39.86	127.94	113.13	249.63	9.79	38.08	88.42	45.32	76.12	69.32	164.09	10.65	14.96	91.07	42.25	121.07	115.14	252.27	7.51	29.24	95.1	45.64
58.61	50.71	126.26	8.59	34.79	86.53	40.17	54.77	42.09	181.81	8.34	26.52	76.85	23.15	60.57	52.39	183.14	9.97	13.6	86.49	28.61	92.58	90.53	119.25	4.72	29.58	97.79	75.92
105.59	102.65	223.64	9.37	24.76	97.22	45.9	129.54	123.45	198.47	8.61	29.92	95.3	62.2	34.69	18.18	164.3	9.42	46.46	52.4	11.06	76.65	54.32	225.99	17.12	40.8	70.87	24.04
22.32	12	50.08	15.24	160.48	53.75	23.96	78.14	70.85	110.72	5.26	33.44	90.67	63.98	116.64	109.78	179.1	9.05	22.96	94.12	61.29	160.96	159.61	260.86	9.19	31.07	99.17	61.19
81.78	78.4	272.56	7.23	29.24	95.86	28.76	45.5	27.36	180.46	11.94	51.58	60.14	15.16	110.52	107.77	211.49	9.77	33.01	97.51	50.96	140.56	134.34	259.37	16.69	35.9	95.58	51.8
35.91	27.37	104.89	15.51	46.8	76.23	26.1	64.62	41.16	162.27	10.77	41.96	63.69	25.36	145.95	144.52	229.25	9.81	32.64	99.02	63.04	105.45	99.46	237.46	8.8	25.45	94.32	41.88
62.84	46.95	237.44	11.5	32.38	74.72	19.78	83.07	76.04	249.68	10.47	23.12	91.54	30.46	149.47	146.27	263.4	11.63	42.84	97.86	55.53	50.65	35.33	184.82	9.25	43.96	69.76	19.12
98.22	95.04	215.1	8.91	17	96.76	44.19	150.9	146.79	220.46	7.73	36.45	97.28	66.58	63.08	35.83	214	15.94	38.63	56.8	16.74	159.37	135.9	274.98	17.49	36.04	85.28	49.42
88.66	73.42	251.56	10.25	39.89	82.81	29.19	113.77	106.67	246.86	10.73	23.39	93.76	43.21	117.32	112.22	204.97	11.58	25.97	95.65	54.75	56.41	31.83	223.18	13.61	53.58	56.44	14.26
68.9	64.85	111.88	4.42	47.6	94.12	57.97	45.62	15.06	55.24	13.57	93.28	33.01	27.26	118.53	112.25	297.02	12.56	28.56	94.7	37.79	22.83	6.66	55.82	3.57	85.79	29.19	11.94
94.96	90.31	218.5	11.65	34.79	95.11	41.33	135.1	128.64	169.28	9.22	26.75	95.22	75.99	127.75	120.03	257.66	8.73	33.09	93.96	46.59	53.36	21.31	184.41	17.93	55.35	39.94	11.56
135.48	128.86	253.85	9.46	33.01	95.12	50.76	138.3	136.7	259.73	8.91	40.36	98.84	52.63	111.24	108.07	228.95	12.57	29.92	97.15	47.2	98.82	47.72	159.19	12.86	33.79	48.29	29.98
112.35	105.15	213.48	11.36	20.66	93.59	49.25	36.33	24.3	123.36	10.92	32.33	66.89	19.7	135.48	127.67	263.71	13.54	28.2	94.23	48.41	72.27	15.24	192.21	14.99	36.72	21.09	7.93
113.39	98.85	201.74	9.73	22.44	87.18	49	58.13	54.51	248.65	10.17	21.08	93.77	21.92	114.52	106.29	214.76	9.98	21.12	92.82	49.49	138.72	134.57	268.14	9.83	41.48	97.01	50.19
63.47	21.28	150.8	14.6	73.23	33.53	14.11	43.05	15.25	118.39	8.76	41.05	35.42	12.88	122.14	119.61	216.98	11.47	29.15	97.93	55.12	49.06	24.14	166.53	9.43	50.21	49.21	14.5
37.37	8.9	58.14	4.21	29.28	23.82	15.31	136.91	127.27	258.84	26.21	32.01	92.96	49.17	132.29	127.11	225.58	9.49	27.2	96.08	56.35	130.44	127.48	196.8	11.38	28.84	97.73	64.77
129.99	127.23	254.15	10.54	32.7	97.87	50.06	53.62	27.39	200.13	10.28	55.66	51.09	13.69	146.65	130.11	223.77	10.66	32.38	88.72	58.15	67.03	63.52	118.41	4.39	49.64	94.76	53.64
73.39	63.16	179.6	11.09	27.83	86.07	35.17	74.22	57.68	209.09	11.66	14.28	77.71	27.59	116.76	114.3	258.64	11.53	34.39	97.89	44.19	103.56	96.38	218.61	18.03	22.7	93.07	44.09
116.43	112.52	213.8	7.66	25.45	96.64	52.63	92.53	81.19	230.88	7.98	44.35	87.74	35.16	84.88	81.2	157.68	7.81	14.28	95.66	51.5	66.98	49.04	87.02	4.17	35.49	73.21	56.36
33.29	11.65	77.62	8.09	58.89	34.99	15.01	81.92	78.8	172.18	10.59	19.72	96.2	45.77	86.19	78.15	183.82	9.1	19.04	90.67	42.52	40.11	10.32	87.51	7.82	41.05	25.74	11.8
143.46	134	272.36	9.61	30.6	93.4	49.2	72.94	69	194.89	8.3	13.6	94.6	35.41	136.39	131.58	238.63	10.09	30.95	96.47	55.14	164.64	163.32	256.71	9.48	41.75	99.2	63.62
121.04	119.06	164.02	6.69	37.4	98.37	72.59	43.44	30.52	158.33	7.49	59.15	70.26	19.28	160.66	155.27	257.23	17.45	28.78	96.64	60.36	143.86	137.39	271.36	9.92	37.83	95.51	50.63
44.15	37.32	232.61	9.18	43.65	84.53	16.05	87.14	80.5	157.06	8.77	39.2	92.38	51.26	51.06	40.52	138.18	7.85	28.16	79.36	29.32	142.2	136.76	289.89	8.88	34.09	96.17	47.18
126.67	116.99	216.01	8.55	22.7	92.36	54.16	124.95	122.21	243.86	12.41	28.2	97.8	50.11	143.17	136.16	240.65	10.95	28.89	95.11	56.58	9.49	7.72	28.33	1.91	37.4	81.37	27.26
150.69	144.66	316.98	9.69	37.4	96	45.64	70.54	55.13	116.78	7.55	36.04	78.16	47.21	40.22	13.83	109.26	15.61	44.71	34.39	12.66	99.58	95.72	260.27	9.63	21.76	96.13	36.78
95.65	89.69	192.28	8.25	18.09	93.77	46.65	63.99	36.35	183.6	10.97	33.01	56.81	19.8	139.34	134.09	245.89	10.64	29.92	96.24	54.53	162.3	153.39	253.89	10.03	37.83	94.51	60.42
139.87	134.31	232.24	7.97	32.7	96.02	57.83	106.35	103.17	248.99	8.97	23.12	97.01	41.43	37.99	16.14	143.69	9.01	47.87	42.48	11.23	132.4	126.5	258.6	8.57	29.22	95.55	48.92
152.19	146.81	245.55	10.35	35.08	96.47	59.79	70.49	65.55	173.49	11.02	17	92.98	37.78	130.2	126.03	239.98	11.85	33.57	96.8	52.52	63.86	9.24	139.69	10.55	43.52	14.47	6.61
121.76	118.77	247.65	9.27	37.57	97.54	47.96	60.53	37.48	213.72	11.16	44.2	61.92	17.54	64.77	60.6	171.94	8.56	27.83	93.57	35.25	49.06	34.68	241.09	11.66	61.88	70.7	14.39
133.16	128.66	189.56	6.76	37.4	96.62	67.87	129.63	125.13	260.66	10.11	33.82	96.53	48	64.38	31.31	221.43	12.8	43.52	48.63	14.14	144.2	137.38	287.66	11.73	31.64	95.27	47.76
78.77	73.71	165.5	11	19.26	93.57	44.54	104.02	99.83	267.4	11.22	32.33	95.97	37.33	133.17	125.55	222.62	10.68	34.09	94.28	56.4	90.93	9.69	148.45	9.07	76.84	10.66	6.53
93.92	90.66	236.63	11.09	25.84	96.53	38.31	148.62	136.07	283.58	10.83	32.7	91.55	47.98	147.01	144.61	224.92	12.66	31.28	98.37	64.29	135.41	131.91	229.55	10.99	32.22	97.42	57.47
111.59	101.41	237.75	9.06	29.24	90.88	42.66	21.5	12.71	62.29	4.05	43.65	59.13	20.41	114.79	110.99	174.12	10.79	18.36	96.69	63.74	118.96	110.13	208.11	12.94	26.77	92.57	52.92
124.86	118.71	296.05	8.92	30.61	95.07	40.1	112.07	103.04	304.3	9.52	32.38	91.94	33.86	110.71	106.69	203.9	9.56	21.82	96.36	52.32	47.24	23.81	98.83	16.87	88.4	50.4	24.09
48.69	40.18	108.4	5.33	33.09	82.54	37.07	138.68	130.93	236.71	8.43	27.14	94.41	55.31	26.69	4.55	81.91	20.65	69.47	17.06	5.56	48.66	39.7	205.74	12.16	26.29	81.57	19.29
115.15	109.35	253.92	10.27	30.95	94.96	43.07	114.42	90.56	162.78	6.78	37.83	79.15	55.64	133.88	128.47	217.24	9.45	23.94	95.96	59.14	64.46	14.49	199.99	16.14	54.34	22.49	7.25
146.24	141.21	237.03	9.43	33.4	96.56	59.58	133.56	128.89	244.13	9.69	30.26	96.5	52.8	124.78	118.47	235.07	10.21	26.52	94.94	50.4	139.52	133.13	232.48	11.28	32.71	95.42	57.26
109.51	104.07	219.74	9.45	23.8	95.03	47.36	132.57	127.5	241.2	8.33	31.64	96.17	52.86	133.29	130.95	243.04	11.37	35.49	98.25	53.88	42.73	10.25	125.02	9.26	60.52	23.99	8.2
118.94	109.93	272.31	10.94	29.44	92.42	40.37	134.36	128.68	272.21	9.76	28.54	95.77	47.27	135.2	132.31	244.92	10.02	35.53	97.86	54.02	98.26	38.83	243.16	20.76	25.84	39.52	15.97
115.52	109.71	218.14	9.24	21.37	94.98	50.3	47.88	45.73	55.43	2.06	29.92	95.52	82.5	121.62	116.13	196.98	9.71	21.76	95.49	58.96	99.24	40.52	251.59	17.54	42.64	40.84	16.11
98.61	95.77	208.05	10.53	37.04	97.11	46.03	65.38	57.27	215.09	10.2	39.49	87.6	26.63	54.58	40.96	181.39	13.03	31.34	75.04	22.58	53.79	32.73	202.93	10.33	42.44	60.85	16.13
70.11	29.15	142.61	13.56	56.44	41.58	20.44	52.82	26.9	200.65	12.26	57.8	50.92	13.41	148.38	138.99	283.65	10.23	33.01	93.67	49	107.09	104.67	211.41	10.51	16.9	97.74	49.51
105.92	97.37	136.74	4.29	41.05	91.92	71.21	109.73	104.41	207.91	7.75	35.77	95.15	50.22	101.36	99.89	288.63	10.97	29.92	98.56	34.61	130.34	122.52	229.39	9.58	26.14	94.01	53.41
108.17	105.86	275.13	9.82	29.92	97.86	38.47	119.72	115.46	248.21	9.34	29.92	96.45	46.52	74.62	70.92	85.36	4.99	25.05	95.03	83.08	134.21	128.75	238.54	7.27	38.52	95.93	53.98
158.53	126.09	255.42	15.12	41.27	79.54	49.37	125.49	123.08	282.08	9.21	29.24	98.08	43.63	104.37	60.28	204.6	14.42	33.24	57.76	29.46	150.2	144.48	261.58	8.49	31.96	96.19	55.24
128.9	120.29	272.51	12.64	30.95	93.32	44.14	78.91	51.2	130.33	7.96	37.64	64.87	39.28	30.91	10.28	104.88	6.64	32.38	33.25	9.8	153.36	145.03	184.99	9.03	37.83	94.57	78.4
84.26	67.02	256.79	11.36	37.14	79.54	26.1	56.32	52.39	110.63	5.78	31.28	93.02	47.35	115.7	108.04	177.21	7.24	34	93.37	60.97	140.18	135.82	178.95	8.88	25.16	96.88	75.9
136.87	135.4	240.34	10.01	44.2	98.92	56.34	111.93	108.7	205.39	12.47	24.35	97.11	52.92	68.41	27.7	225.02	26.26	50.32	40.49	12.31	39.96	6.74	63.19	3.8	37.9	16.86	10.66
127.51	120.7	255.28	8.64	26.14	94.66	47.28	75.93	51.04	206.12	10.09	37.4	67.22	24.76	118.12	112.14	238.56	10.86	33.32	94.93	47.01	163.82	149.88	254.46	11.93	40.36	91.49	58.9
112.59	108.72	217.24	7.52	27.51	96.56	50.05	123.59	116.98	217.57	11.4	33.4	94.66	53.77	136.7	130.61	221.6	11.27	33.01	95.54	58.94	74.43	59.24	176.92	10.36	30.6	79.59	33.48
101.37	99.51	220.05	8.25	21.12	98.17	45.22	140.17	94.07	250.32	12.79	30.95	67.11	37.58	59.62	34.86	170.6	6.59	64.6	58.47	20.44	131.27	127.16	225.83	8.03	27.51	96.87	56.31
91.73	86.3	225.85	9.33	25.84	94.08	38.21	111.48	103.58	289.49	9.84	29.24	92.92	35.78	44.35	5.32	175.28	20.01	145.16	11.99	3.03	140.33	133.92	258.93	6.84	31.64	95.43	51.72
77.67	64.26	211.5	11.36	41.48	82.73	30.38	109.34	105.02	228.25	7.22	26.47	96.05	46.01	89.14	82.29	149.86	10.62	32.33	92.32	54.91	40.28	7.31	116.95	7.95	65.12	18.14	6.25
94.79	92.82	177.44	6.51	22.44	97.92	52.31	124.25	121.18	213.54	9.99	25.84	97.53	56.75	99.91	98.58	218.34	8.01	25.05	98.67	45.15	49.41	24.31	169.04	11.32	63.24	49.21	14.38
93.93	87.07	233.54	9.31	25.84	92.69	37.28	121.79	119.68	205.92	10.51	32.64	98.26	58.12	84.7	76.02	226.54	12.34	23.12	89.75	33.56	43.06	9.71	78.13	4.98	19.95	22.54	12.42
133.27	125.69	172.8	6.49	41.48	94.31	72.74	137	135.77	241.78	9.91	37.4	99.1	56.15	67.46	58.32	207.37	11.11	17	86.44	28.12	32.88	3.21	99.02	8.12	45.39	9.75	3.24
67.32	21.15	174.41	13.02	53.58	31.42	12.13	77.43	74.56	108.9	4.78	50.21	96.29	68.47	156.24	147.33	239.91	9.74	24.64	94.3	61.41	139.67	134.18	213.59	7.85	28.45	96.07	62.82
142.23	135	255.19	8.77	31.64	94.91	52.9	101.3	95.06	232.9	9.14	23.22	93.84	40.82	138.56	133.01	215.12	11.04	29.22	95.99	61.83	138.42	133.54	262.49	9.91	31.31	96.47	50.87
140.83	135.6	258.63	7.74	34.69	96.28	52.43	102.84	100.4	247.01	11.54	25.74	97.63	40.65	87.01	85.41	119.02	4.5	45.92	98.15	71.76	28.19	7.24	113.86	7.36	59.16	25.7	6.36
107.38	56.59	136.9	5.34	41.27	52.7	41.34	99.14	92.25	238.58	9.08	23.94	93.06	38.67	119.41	116.01	248.48	10.14	16.53	97.15	46.69	110.53	102.33	208.11	9.53	21.32	92.58	49.17
141.61	137.68	242.65	9.5	37.14	97.22	56.74	124.31	116.72	225.56	9.69	22.44	93.89	51.75	138.34	132.46	219.75	7.13	28.89	95.75	60.28	70.86	36.98	221.67	13.7	59.15	52.19	16.68
109.13	102.89	307.17	10.22	22.96	94.28	33.5	117.68	108.71	245	11.93	27.51	92.38	44.37	49.9	41.99	67.09	2.64	36.3	84.15	62.58	139.81	134.84	243.33	9.43	34.79	96.44	55.41
32.56	11.02	84	6.96	47.31	33.85	13.12	102.66	99.49	215.87	7.85	38.27	96.91	46.09	153.07	149.64	237.88	8.63	30.95	97.76	62.91	146.83	144.59	202.33	10.55	18.36	98.48	71.46
116.32	107.44	214.69	13.3	28.86	92.37	50.05	153.24	149.29	233.95	9.86	31.64	97.42	63.81	88.28	58.68	226.37	11.88	35.49	66.48	25.92	134.76	133.27	202.49	9.4	29.19	98.9	65.82
43.62	41.98	67.91	4.9	37.83	96.23	61.81	109.83	105.96	221.05	11.77	23.39	96.47	47.93	123.24	117.81	224.26	10.57	23.39	95.59	52.53	43.84	35.72	108	5.46	40.8	81.48	33.07
121.19	115.99	234.41	9.91	26.52	95.71	49.48	45.06	9.45	99	9.38	59.84	20.97	9.54	153.73	149.02	284.44	10.6	34.5	96.94	52.39	53.19	23.12	116.53	10.51	26.52	43.47	19.84
127.57	123.03	224.53	9.78	23.8	96.44	54.79	137.68	135.98	213.4	10.49	33.01	98.76	63.72	150.61	144.72	266.92	9.61	35.77	96.09	54.22	116.64	114.82	211.43	10.25	37.14	98.44	54.31
94.41	86.66	223.86	11.11	24.64	91.8	38.71	108.99	106.37	190.86	7.91	20.68	97.6	55.73	109.29	103.78	124.6	7.67	15.13	94.96	83.29	115.44	111.35	221.8	11.13	21.82	96.46	50.2
35.19	7.55	81.66	7.28	38.08	21.45	9.24	61.34	43.28	138.92	6.63	48.71	70.56	31.15	113.3	111.5	252.33	9.69	28.2	98.41	44.19	140.94	137.93	248.79	8.6	33.7	97.87	55.44
102.95	99.88	249.37	10	26.52	97.03	40.05	118.09	110.96	208.94	9.88	25.34	93.96	53.11	139.89	136.66	261.23	9.01	30.6	97.69	52.31	65.59	31.37	102.84	3.64	46.77	47.82	30.5
72.56	66.64	169	10.38	43.52	91.84	39.43	75.15	66.39	122.56	5.12	41.96	88.35	54.17	148.91	140.39	201.82	19.67	36.2	94.28	69.56	64.26	35.45	216.92	11.05	54.34	55.16	16.34
73.57	69.78	164.59	8.86	16.32	94.86	42.4	45.08	29.25	165.29	10.53	34.79	64.88	17.69	138.7	132.3	255.17	8.61	29.24	95.39	51.85	118.18	114.49	226.7	10.56	22.44	96.88	50.5
119.93	115.75	212.27	8.59	29.22	96.52	54.53	125.68	119.14	272.89	10.4	25.05	94.8	43.66	119.46	114.9	189.61	10.53	22.27	96.18	60.6	62.13	37.51	134.09	12.88	68.09	60.37	27.97
103.9	100.65	277.97	8.61	41.43	96.87	36.21	57.85	43.88	236.12	10.37	44.88	75.86	18.58	63.72	45.25	114.61	8.43	46.77	71.01	39.48	28.5	4.42	64.37	5.76	15.82	15.49	6.86
120.69	115.28	307.93	10.57	27.83	95.52	37.44	75.46	53.95	183.78	9.16	57.8	71.5	29.36	83.07	74.98	190.08	10.31	12.41	90.26	39.45	48.89	24.04	111.74	6.9	43.14	49.17	21.51
127.18	120.07	246.69	7.76	26.52	94.41	48.67	92.07	77.79	228.8	11.74	25.84	84.49	34	126.75	122.73	215.81	8.71	23.12	96.82	56.87	108.21	101.74	228.22	10.36	29.58	94.02	44.58
85.86	83.56	185.03	10.98	14.96	97.32	45.16	81.28	76.17	208.74	15.13	25.16	93.71	36.49	13.76	11.38	32.22	2.5	288.06	82.67	35.32	134.93	132.16	245.71	9.67	37.4	97.95	53.79
41.72	12.82	103.11	7.99	44.2	30.72	12.43	137.54	134.23	270.85	11.29	36.72	97.59	49.56	74.5	31.84	161.02	23.93	101.11	42.74	19.77	26.85	12.5	54.45	3.06	38.72	46.56	22.96
43.47	17.4	138.08	8.04	54.34	40.04	12.6	135.66	126.98	259.51	15.87	33.15	93.6	48.93	18.14	0	66.82	28.86	283.17	0	0	38.86	19.64	115.95	8.04	35.77	50.54	16.94
70.17	65.34	180.49	9.78	23.33	93.12	36.2	42.93	21.54	113.49	4.66	61.88	50.17	18.98	73.59	55.03	153.84	6.63	40.65	74.77	35.77	67.8	45.88	186.52	10.11	39.89	67.67	24.6
145.22	141.48	292.76	8.52	28.86	97.43	48.33	102.03	95.24	219.33	9.82	24.76	93.35	43.43	60.06	52.55	193.88	10.16	20.4	87.51	27.11	128.56	97.42	282.65	22.93	43.14	75.77	34.47
78.94	73.91	239.08	11.69	24.76	93.62	30.91	118.4	115.04	246.57	10.15	37.87	97.16	46.65	125.55	123.11	269.84	11.91	34.19	98.06	45.62	140.17	132.96	228.99	9.16	26.05	94.85	58.06
123.82	115.6	221.9	9.26	21.26	93.36	52.09	90.06	68.78	169.92	12.58	37.74	76.38	40.48	139.03	132.21	188.67	10.38	29.22	95.09	70.07	83.46	77.92	233.54	11.06	22.01	93.36	33.37
92.64	39.12	106.2	2.92	39.89	42.22	36.83	104.37	96.28	240.18	8.79	27.14	92.25	40.09	128.28	121.86	183.39	9.94	26.68	94.99	66.45	75.31	71.68	210.32	16.77	22.31	95.18	34.08
136.22	128.42	218.44	11.79	29.92	94.27	58.79	105.46	101.81	283.64	9.05	29.38	96.54	35.89	97.59	92.3	174.68	12	21.12	94.58	52.84	135.1	127.97	243.19	10.83	30.61	94.72	52.62
97.34	88.97	214.22	11.29	19.95	91.4	41.53	98.7	82.85	228.18	26.56	24.31	83.94	36.31	24.08	9.04	64.33	9.66	290.55	37.54	14.05	46.4	8.62	89.62	7.73	43.52	18.59	9.62
150.97	146.54	278.59	9.99	30.95	97.07	52.6	77.83	72.4	184.83	10.92	24.22	93.03	39.17	142.64	137.65	261.21	10.64	37.49	96.5	52.7	40.64	17.12	109.15	7.69	39.89	42.12	15.68
49.52	5.38	90.41	7.02	62.62	10.86	5.95	45.18	8.75	151.75	10.91	67.67	19.37	5.77	151.96	146.89	278.03	13.63	35.08	96.66	52.83	86.9	78.93	208.74	8.36	15.64	90.83	37.81
93.33	88.51	165.01	10.74	22.96	94.84	53.64	94.43	90.6	178.08	9.47	31.77	95.95	50.88	118.35	113.19	218.15	13.7	34.39	95.64	51.89	120.69	113.3	180.83	8.82	34.09	93.87	62.65
108.35	99.65	213.08	9.34	26.49	91.97	46.77	56.47	27.33	192.87	11.82	62.56	48.39	14.17	117.76	113.55	177.22	10.27	23.23	96.42	64.07	147.47	140.23	238.43	9.57	34.39	95.09	58.81
25.86	22.99	43.22	2.7	36.72	88.88	53.19	147.47	139.38	199.9	9.51	27.33	94.51	69.73	167.82	166.36	194.48	10.18	31.26	99.13	85.54	43.18	22.63	75.29	5.08	40.36	52.42	30.06
107.39	103.65	173.01	9.45	32.7	96.52	59.91	157.15	150.32	265.85	9.75	38.52	95.65	56.54	72.23	44.62	155.91	5.89	50.21	61.78	28.62	50.22	38.92	153.39	7.22	32.64	77.5	25.38
28.78	6.33	126.55	6.95	31.64	22	5	143.85	143.18	214.47	10.41	17.1	99.53	66.76	142.17	138.61	204.3	8.83	44.02	97.49	67.85	115.96	111.33	203.9	9.46	23.8	96.01	54.6
42.07	15.83	95.89	13.32	57.54	37.62	16.51	73.49	68.44	234.59	13.18	13.76	93.13	29.18	37.89	8.46	86.64	7.63	46.62	22.32	9.76	42.05	9.57	102.25	8.18	46.93	22.75	9.36
139.98	133.93	255.99	8.41	30.61	95.68	52.32	98.63	92.73	205.48	10.49	21.82	94.01	45.13	54.84	53.46	121.52	6.31	23.12	97.49	44	129.03	120.15	212.31	8.61	36.33	93.12	56.59
88.76	83.86	218.94	12.1	17	94.47	38.3	53.9	29.55	76.83	3.83	33.01	54.82	38.46	71.68	66.54	193.95	10.11	23.23	92.84	34.31	57.28	19.69	128.64	10.53	23.12	34.38	15.31
140.22	133.65	231.01	11.33	31.28	95.31	57.85	130.88	117.94	254.26	10.6	35.36	90.12	46.39	68.44	60.36	92.12	3.64	34.77	88.19	65.52	57.34	30.26	137.53	8.7	43.65	52.78	22
66.22	56.86	167.96	9.91	14.28	85.87	33.85	151.76	150.63	221.25	10.14	35.46	99.25	68.08	45.14	8.82	130.15	12.96	49.64	19.54	6.78	124.57	116.18	207.51	9.1	23.39	93.27	55.99
30.25	14.11	90.37	8.28	22.53	46.64	15.61	129.13	128.11	253.02	9.56	21.76	99.21	50.63	138.23	133.01	193.22	6.68	36.45	96.23	68.84	60.21	47.11	135.98	10.45	25.74	78.25	34.65
136.97	133.71	277.32	9.94	34	97.62	48.22	152.2	149.01	184.99	6.45	31.64	97.9	80.55	119.09	112.93	241.6	7.83	28.89	94.82	46.74	67	56.06	161.52	10.17	35.08	83.67	34.71
40.12	7.89	140.05	9.93	78.88	19.66	5.63	67.01	42.67	237.62	10.25	52.96	63.68	17.96	141.94	138.48	187.68	7.56	32.41	97.56	73.78	42.49	8.9	127.59	5.5	46.77	20.94	6.97
55.82	42.13	96.81	3.64	46.62	75.47	43.52	130.76	124.11	249.12	10.58	31.28	94.91	49.82	117.98	113.25	281.41	14.83	34.79	95.99	40.24	28.75	8.63	63.62	4.42	45.56	30.03	13.57
120.37	115.07	225.83	8.35	24.76	95.59	50.95	120.28	115.26	270.31	9.64	26.82	95.82	42.64	115.31	109.33	230.81	11.54	22.44	94.82	47.37	74.34	67.3	175.72	10.18	22.7	90.53	38.3
108.59	103.95	198.88	9.91	24.76	95.73	52.27	47.38	27.23	101.97	5.78	43.65	57.48	26.7	100.09	94	217.83	15.95	21.08	93.92	43.15	130.45	128.15	213.17	8.54	26.52	98.23	60.11
115.62	111.26	253.46	10.52	33.4	96.23	43.9	128.81	122.83	248.89	8.16	36.45	95.36	49.35	21.33	5.93	70.16	5.17	57.45	27.81	8.46	25.51	11.56	112.93	5.67	70.84	45.31	10.23
121.24	113.32	196.65	9.29	20.74	93.46	57.62	134.66	100.51	247.02	9.29	33.4	74.64	40.69	137.58	126.97	249.83	8.36	25.45	92.29	50.82	130.95	126.2	286.95	9.49	30.34	96.37	43.98
80.32	72.38	145.95	9.41	26.52	90.12	49.59	95.15	91.59	230.28	11.67	16.32	96.26	39.78	32.87	21.49	72.98	6.9	169.66	65.4	29.45	126.02	120.1	235.35	10.3	22.96	95.3	51.03
89.15	77.16	185.53	9.27	25.76	86.55	41.59	60.62	21.61	154.65	11.22	53.04	35.65	13.98	33.44	10.49	79.36	5.58	49.87	31.36	13.22	143.29	138.51	260.28	13.93	39.49	96.67	53.22
123.62	111.31	270.37	15.6	35	90.04	41.17	100.04	97.02	127.61	6.07	46.92	96.99	76.03	106.59	98.18	253.42	10.99	21.08	92.11	38.74	24.78	12.62	98.87	4.76	63.28	50.92	12.76
76.57	68.18	127.73	6.22	32.64	89.05	53.38	40.47	13.68	124.07	4.15	63.92	33.81	11.03	90.77	84.35	155.56	17.32	63.97	92.93	54.23	140.14	134.58	262.43	10.52	37.14	96.03	51.28
49.68	11.13	81.28	3.5	40.13	22.41	13.7	90.38	60.03	183.97	9.31	45.92	66.41	32.63	82.14	79.66	201.26	8.99	21.76	96.99	39.58	67.84	61.99	174.4	12.12	11.22	91.38	35.54
101.65	100.4	196.5	9.8	30.95	98.76	51.09	88.56	80.51	101.61	9.26	33.78	90.91	79.23	145.63	140.99	264.23	9.06	34.39	96.81	53.36	86.38	72.49	166.65	9.94	27.78	83.92	43.5
114.64	108.39	212.37	11.38	22.7	94.55	51.04	74.97	70.65	188.8	10.24	21.32	94.24	37.42	126.4	118.36	288.95	11.38	33.01	93.64	40.96	156.49	150.02	229.22	7.74	34.41	95.86	65.45
107.39	101.56	195.54	9.48	23.12	94.58	51.94	46.89	30.35	129.17	12.59	29.24	64.72	23.49	126.88	124.07	262.67	7.75	29.92	97.79	47.24	200.08	172.45	274.36	16.12	42.74	86.19	62.86
31.71	8.53	76.44	7.28	44.2	26.91	11.16	113.55	102.63	261.91	11.16	31	90.38	39.19	26.78	4.35	139.79	10.8	164.17	16.26	3.11	24	10.23	196.4	5.83	55.02	42.62	5.21
120.24	116.02	233.24	10.52	28.53	96.49	49.74	120.91	118.64	269.54	11.95	30.29	98.12	44.02	165.45	162.84	258.79	11.55	40.8	98.42	62.93	27.38	25.4	55.71	3.86	58.48	92.76	45.58
124.23	121.38	219.56	9.75	29.92	97.7	55.28	108.62	102.25	196.18	8.89	26.14	94.14	52.12	120.74	118.54	203.6	8.83	24.48	98.18	58.22	94.11	87.4	213.47	25.12	35.36	92.86	40.94
74.79	61.53	193.42	11.55	16.32	82.27	31.81	84.56	43.59	204.45	19.14	48.15	51.56	21.32	127.46	121.97	208.59	8.88	28.89	95.7	58.47	21.85	10.18	85.5	4.58	59.12	46.62	11.91
83.03	68.63	232.03	9.41	50.21	82.66	29.58	119.6	97.8	266.93	17.65	45.45	81.77	36.64	151.45	147.61	204.9	9.98	29.24	97.47	72.04	66.03	42.53	98.89	6.72	44.53	64.42	43.01
146.82	141.8	242.25	11.27	39.89	96.58	58.54	80.07	76.13	179.43	9.73	14.96	95.08	42.43	21.32	13.65	57.98	3.46	46.92	64.03	23.55	117.46	113.17	251.01	9.87	31.12	96.35	45.08
79.6	76.07	110.69	6.7	33.32	95.56	68.73	65.06	51.02	110.55	6.46	38.52	78.42	46.15	71.7	59.6	188.13	10.06	14.28	83.12	31.68	44.85	4.63	109.25	8.69	53.72	10.31	4.23
135.74	127.9	270.02	9.22	28.89	94.23	47.37	93.84	91	166.81	9.9	17	96.97	54.55	123.97	120.01	200.03	9.07	23.1	96.8	59.99	168.56	165.32	238.72	8.3	34.39	98.08	69.25
62.33	44.44	158.38	10.23	22.44	71.3	28.06	88.24	83.46	220.35	10.34	23.8	94.58	37.88	130.52	126.66	253.56	9.56	31.64	97.05	49.95	91.45	86.01	240.12	10.91	23.94	94.05	35.82
103.22	96.34	250.45	10.74	27.2	93.33	38.47	123.16	121.64	227.72	9.55	22.7	98.76	53.42	69.21	38.7	136.83	7.04	29.31	55.92	28.28	113.42	108.87	197.67	10.88	18.47	95.98	55.07
98.07	90.87	148.6	9.26	34	92.65	61.15	73.71	68.23	170.62	10.33	17	92.56	39.99	154.75	149.39	243.54	7.95	32.64	96.54	61.34	153.72	142.88	214.2	22.84	42.16	92.95	66.71
117.57	113.44	258.72	11.34	32.64	96.49	43.85	138.83	131.64	258.56	10.21	28.89	94.82	50.91	146.37	143.56	248.54	8.68	28.4	98.08	57.76	58.9	54.1	171.39	10.61	15.64	91.84	31.56
124.21	110.35	160.17	5.09	33.32	88.84	68.89	81.92	77.54	230.96	11.17	21.08	94.64	33.57	126.97	124.46	175.65	7.13	42.19	98.03	70.86	140.97	130.72	247.11	11.66	34.39	92.73	52.9
34.22	27.94	96.1	3.91	43.14	81.65	29.07	18.74	8.9	82.42	6.68	16.51	47.47	10.79	126.61	121.56	219.67	9.84	25.84	96.01	55.34	84.41	79.26	220.54	8.88	34.39	93.9	35.94
94.21	3.37	163.68	8.25	72.36	3.58	2.06	58.44	50.43	206.93	9.8	35.75	86.28	24.37	129.16	117.46	235.02	9.91	36.72	90.94	49.98	23.36	8.03	46.77	4.57	36.45	34.36	17.16
53.29	19.88	168.68	17.55	52.27	37.3	11.78	89.44	53.04	145.84	6.17	41.48	59.3	36.37	119.61	115.33	240.01	10.12	34.39	96.43	48.05	137.41	135.21	253.17	10.38	37.23	98.4	53.41
103.14	94.53	225.03	10.9	23.08	91.65	42.01	116.27	113.44	272.51	9.48	37.76	97.57	41.63	114.07	108.57	214.54	11.11	21.82	95.17	50.6	123.4	119.89	277.14	8.89	43.14	97.15	43.26
57.13	55.77	84.87	2.69	55.71	97.63	65.71	64.4	54.68	93.82	3.07	38.72	84.91	58.29	138.29	134.76	232.52	9.03	31.64	97.45	57.95	149.76	142.42	262.44	11.23	33.01	95.1	54.27
40.74	12.71	80.33	5.05	38.52	31.2	15.82	123.27	113.84	236.57	10.01	37.14	92.36	48.12	117.4	112.1	220.44	13.3	30.26	95.49	50.85	71.23	69.57	104.12	2.98	47.87	97.66	66.81
68.4	63.16	134.2	5.73	44.02	92.34	47.06	100.7	98.48	293.66	8.9	40.8	97.8	33.54	143.42	139.41	191.5	10.81	27	97.2	72.8	54.52	1.9	186.6	9.96	202.64	3.49	1.02
143.67	139.43	246.79	9.02	35	97.04	56.5	108.44	76.99	144.16	3.93	46.77	71	53.4	66.25	60.77	166.75	8.3	26.52	91.73	36.44	75.12	68.13	226.02	9.01	26.44	90.69	30.14
92.91	63.48	144.55	4.05	52.27	68.33	43.92	102.47	101.02	210.64	8.81	25.16	98.58	47.96	121.44	107.37	222.51	11.33	29.92	88.41	48.26	128.59	127.25	216.78	9.61	39.57	98.96	58.7
80.69	69.95	214.34	10.68	18.36	86.69	32.64	36.44	11.51	69.19	3.79	34.68	31.58	16.63	109.75	106.87	234.15	12.09	38.27	97.38	45.64	63.27	43.65	165.59	11.1	22.96	68.98	26.36
51.05	43.8	107.06	8.96	44.88	85.81	40.91	39.19	7.65	82.81	8.19	47.02	19.52	9.24	107.23	101.48	244.59	17.15	24.76	94.63	41.49	65.46	10.57	152.77	14.76	72.97	16.14	6.92
78.2	69.29	216.26	8.44	17.68	88.6	32.04	134.96	127.94	243.52	10.45	26.05	94.8	52.54	126.29	122.7	254.67	12.19	30.26	97.15	48.18	101.33	96.63	283.02	11.14	27.07	95.36	34.14
56.46	43.35	168.81	11.66	15.91	76.79	25.68	111.1	106.62	204.79	8.65	25.43	95.97	52.06	144.31	142.13	244.72	9.53	41.05	98.49	58.08	145.21	144.13	262.02	9.82	32.64	99.26	55.01
91.55	47.53	149.68	9.93	33.79	51.91	31.75	146.17	136.88	243.27	7.67	32.33	93.64	56.27	118.93	115.23	286.72	10.29	25.2	96.88	40.19	66.16	64.84	90.37	4.36	42.84	98	71.74
163.83	154.52	246.86	11.11	34	94.32	62.59	102.21	97.8	233.96	10.42	34.72	95.69	41.8	28.41	11.52	93.22	5.25	65.47	40.53	12.35	116.37	111.73	234	10.16	22.29	96.01	47.75
122.15	115.74	210.04	8.79	23.39	94.75	55.11	98.74	96.72	201.13	10.53	21.12	97.95	48.09	118.82	115.52	231.67	10.42	30.27	97.23	49.87	47.62	11.59	181.84	13.33	64.97	24.34	6.37
87.89	47.19	233.52	13.62	26.14	53.7	20.21	85.86	81.95	132.16	7	48.57	95.44	62	124.55	115.25	235.46	10.3	23.8	92.54	48.95	41.56	9.91	65.11	5.33	27.88	23.84	15.22
88.25	75.77	135.06	7.89	34.79	85.87	56.1	179.59	177.31	279.86	9.63	37.14	98.73	63.36	55.49	48.43	178.82	13.03	13.76	87.29	27.08	49.33	29.84	154.29	15.11	11.97	60.5	19.34
107.89	105.56	232.6	9.43	23.71	97.85	45.39	141.87	131.81	269.68	9.98	36.61	92.91	48.88	131.81	127.17	247.61	9.32	32.64	96.48	51.36	84.02	79.46	128.94	9.46	32.41	94.57	61.63
38.17	28.3	117.7	6.53	44.2	74.14	24.04	69.87	60.69	198.65	9.1	26.52	86.86	30.55	86.84	64.71	128.86	4.32	43.6	74.52	50.22	96.23	91.56	245.03	11.52	23.57	95.15	37.37
108.64	106.52	197.04	10.69	28.89	98.05	54.06	113.46	111.14	299.01	9.38	31.31	97.95	37.17	124.32	112.06	243.8	14.88	30.63	90.14	45.96	116.84	113.3	194.83	8.07	24.64	96.97	58.15
146.79	144.75	208.63	9.42	37.76	98.62	69.38	127.42	124.04	210.59	7.74	31.64	97.35	58.9	59.56	19.91	216.87	12.72	44.71	33.43	9.18	128.12	122.1	274.66	9.44	29.58	95.3	44.45
128.54	115.52	255.71	9.81	31.31	89.87	45.18	100.36	95.57	265.92	11.84	43.14	95.22	35.94	152.65	145.39	270.36	8.97	38.27	95.25	53.78	56.4	24.59	192.2	11.93	42.16	43.6	12.79
108.61	100.15	205.45	9.53	17.6	92.21	48.75	124.23	121.85	229.48	9.14	30.6	98.08	53.1	102.03	94.45	223.32	8.7	22.53	92.57	42.29	133.53	129.27	208.6	9.35	25.74	96.81	61.97
50.63	25.66	65	4.67	20.63	50.68	39.48	69.77	54.36	96.56	4.02	33.01	77.91	56.29	90.98	83.96	201.66	8.58	17.68	92.28	41.64	63.78	50.32	176.15	12.6	21.08	78.91	28.57
80.16	57.63	205.95	11.31	27.88	71.89	27.98	130.95	128.09	192.52	12.08	30.85	97.81	66.53	73.69	52.87	272.55	10.08	59.04	71.75	19.4	134.25	130.3	206.61	10.66	31.31	97.06	63.07
27.09	4.98	74.4	15.43	206.34	18.39	6.7	131.58	124.68	233.17	11.99	29.58	94.75	53.47	101.5	97.59	198.05	12.16	30.26	96.15	49.28	134.04	126.96	230.98	7.79	34.79	94.72	54.97
39.5	14.56	103.39	8.06	37.4	36.87	14.08	117.03	116.01	226.86	8.63	34	99.13	51.14	35.64	12.97	129.38	8.39	54.4	36.39	10.03	23.63	8.53	65.89	6.23	70.72	36.09	12.94
136.79	132.06	219.71	9.14	30.8	96.54	60.1	132.23	129.04	230.94	9.55	32.97	97.59	55.88	110.4	105.87	197.79	8.18	36.18	95.9	53.53	129.58	128.64	217.48	9.99	37.4	99.28	59.15
129.86	120.49	234.79	8.2	26.05	92.79	51.32	94.65	85.2	266.98	11.84	30.27	90.02	31.91	82.26	67.89	97.88	2.35	52.8	82.53	69.36	146.77	141.03	263.02	9.74	39.44	96.08	53.62
113.18	107.88	217.46	15.14	23.51	95.31	49.61	56.74	39.91	190.75	9.46	32.01	70.34	20.92	92.52	85.46	200.96	11.12	30.6	92.37	42.53	139.75	139.07	241.02	10.87	29.57	99.51	57.7
21.74	13.79	63.07	5.48	36.77	63.44	21.87	134.45	130.32	247.32	11.77	28.2	96.93	52.69	64.41	54.81	208.57	13.26	28.56	85.08	26.28	117.14	114.57	246.47	7.57	29.92	97.81	46.49
22	4.73	91.34	4.94	103.17	21.52	5.18	108.3	104.26	211.08	10.77	26.14	96.26	49.39	142.01	139.16	225.7	10.61	31.72	97.99	61.66	54.53	52.19	115.4	7.66	13.6	95.71	45.22
43.57	25.72	148.14	12.8	24.76	59.03	17.36	110.34	103.91	205.73	10.82	19.23	94.17	50.51	90.35	85.67	161.07	12.53	14.96	94.83	53.19	145.71	144.63	248.59	9.69	32.33	99.26	58.18
133.33	123.47	218.97	8.89	26.52	92.6	56.39	60.21	53.06	232.86	8.66	17.1	88.12	22.78	42.64	34.93	99.12	8.89	38.76	81.93	35.24	150.59	148.71	184.85	9.66	39.39	98.76	80.45
87.31	81.91	122.48	5.56	37.14	93.82	66.88	150.32	143.25	212.99	7.71	35.77	95.29	67.25	143.78	138.83	247.67	9.28	29.92	96.56	56.06	55.55	40.7	204.47	11.57	34	73.26	19.9
80.43	72.82	120.23	19.05	40.8	90.54	60.57	157.1	154.57	223.94	7.44	33.91	98.39	69.02	106.52	97.02	211.78	12.78	30.95	91.08	45.81	55.42	43.22	169.02	7.18	44.14	77.98	25.57
67.85	65.58	187.84	10.94	30.63	96.65	34.91	68.7	12.27	82.65	3.91	26.52	17.86	14.85	18.97	5.51	64.91	7.09	86.97	29.03	8.49	79.23	76.02	117.49	3.92	47.6	95.94	64.7
119.31	114.34	209.75	9.25	26.14	95.84	54.51	30.36	11.69	131	8.43	53.58	38.5	8.92	76.22	72.35	229.1	10.11	31.64	94.93	31.58	121.48	115.09	254.78	10.07	28.89	94.74	45.17
30.81	12.04	71.96	8.68	46.24	39.08	16.73	153.62	148.6	242.24	7.61	36.72	96.73	61.35	27.96	3.79	70.36	4.91	27.2	13.54	5.38	25.97	10.91	94.29	5.26	55.08	42.02	11.57
133.1	129.59	258.88	10.27	35.77	97.36	50.06	140.58	134.52	262.48	8.23	37.57	95.69	51.25	126.13	118.04	221.68	8.78	25.84	93.59	53.25	50.63	11.78	125.96	9.64	29.21	23.27	9.35
145.92	116.69	278.12	17.13	36.18	79.97	41.96	96.28	94.74	222.44	10.89	38.08	98.4	42.59	68.67	52.95	191.26	12.55	17	77.12	27.69	126.65	123.04	277.42	8.74	33.7	97.15	44.35
67.86	62.38	119.77	5.45	44.2	91.93	52.08	63.7	32.82	252.74	16.45	70.28	51.53	12.99	125.08	121.09	224.27	9.15	23.23	96.81	53.99	105.47	102.77	266	10.66	36.05	97.44	38.63
121.61	114	168.06	8.09	22.44	93.74	67.83	49.36	21.23	133.56	10	47.87	43.01	15.9	97.06	91.86	169.25	10.53	21.61	94.64	54.28	126.07	121.58	208.18	9.51	21.76	96.44	58.4
88.74	87.32	209.01	10.02	22.44	98.4	41.78	120.26	117.24	257.34	9.23	28.56	97.49	45.56	123.75	118.77	225.12	8.64	27.46	95.98	52.76	36.23	8.55	142.86	10.1	68	23.59	5.98
76.14	70.47	223.89	20.58	14.96	92.56	31.48	121.24	117.88	267.08	11.75	29.92	97.24	44.14	37.21	10.75	138.42	7.64	78.88	28.89	7.77	110.31	107.55	202.36	7.07	21.86	97.5	53.15
67.25	42.64	139.71	8.66	24.48	63.4	30.52	131.5	125.29	177.39	6.01	38.01	95.28	70.63	35.99	10.98	138.04	7.41	62.62	30.5	7.95	28.27	2	90.68	8.41	48.28	7.09	2.21
102.53	97.59	186.39	10.22	14.96	95.19	52.36	56.82	47	97.29	5.64	22.92	82.72	48.31	140.27	136.1	243.15	8.75	34.39	97.03	55.97	151.59	150.14	209.42	12.82	41.05	99.04	71.69
59.28	57.19	116.4	6.35	30.26	96.47	49.13	128.33	124.57	221.01	11.39	30.32	97.07	56.37	158.46	153.3	234.58	9.19	40.12	96.74	65.35	132.64	123.08	293.68	12.56	35.08	92.8	41.91
61.17	57.45	135.67	14.56	34.68	93.93	42.34	21.93	17.89	99.18	5.49	50.32	81.57	18.04	137.68	129.31	226.7	9.05	34	93.92	57.04	139.03	125.77	278.54	11.95	36.45	90.46	45.15
123.35	121.06	194.69	9.28	26.52	98.14	62.18	144.99	133.34	263.81	9.72	31.31	91.96	50.54	37.99	27.08	77.92	3.55	43.33	71.28	34.75	141.12	130.2	260.9	8.75	33.7	92.26	49.9
147.44	142.56	219.83	11.69	32.01	96.69	64.85	49.57	22.86	232.71	10.98	63.92	46.12	9.82	91.9	79.85	217.52	10.44	23.37	86.89	36.71	99.52	93.74	226.06	9.36	20.45	94.2	41.47
67.95	62.21	198.28	11.39	15.64	91.56	31.38	98.23	89.14	236.13	10.96	19.72	90.74	37.75	102.34	97.11	213.04	7.97	30.43	94.9	45.58	137.15	134.06	230.57	7.24	36.22	97.75	58.14
66.81	54.36	189.87	14.88	25.84	81.36	28.63	49.14	21.14	137.08	15.91	54.34	43.03	15.43	42.21	12.19	136.85	10.75	61.88	28.88	8.91	75.35	72.02	216.38	10.13	16	95.58	33.29
78.41	69.46	114.22	5.45	36.72	88.59	60.81	53.23	48.08	114.95	7.95	40.51	90.32	41.83	97.97	93.96	199.25	11.85	18.36	95.91	47.16	73.65	22.47	204.58	24.75	40.58	30.51	10.98
118.66	111.27	237.07	13.39	32.33	93.77	46.94	42.71	10.55	122.18	6.96	63.32	24.7	8.64	120.2	113.08	216.87	8.73	27.83	94.07	52.14	150.81	144.39	244.34	7.56	32.33	95.74	59.1
94.46	86.63	236.64	10.07	20.42	91.71	36.61	99.9	91.52	136.5	5.89	33.7	91.6	67.05	141.63	136.27	224.71	12.85	30.65	96.21	60.64	86.99	73.52	217.48	9.91	33.7	84.52	33.81
57.39	17.97	133.93	9.07	30.95	31.32	13.42	128.64	123.44	217.76	8.21	31.68	95.96	56.69	92.49	18.13	109.78	5.29	6.88	19.6	16.52	100.18	96.2	212.82	9.25	29.49	96.03	45.2
153.54	148.43	301.44	10.65	30.95	96.67	49.24	103.78	97.66	201.72	10.53	15.64	94.1	48.41	110.8	107.51	201.86	11.71	27.14	97.03	53.26	64.04	31.46	163.34	16.54	57.44	49.12	19.26
114.33	111.66	241.91	10.31	25.84	97.66	46.16	10.97	4.04	46.17	2.99	72.08	36.8	8.74	127.93	127.28	211.12	11.38	35.08	99.49	60.29	126.68	123.38	256.4	9.85	36.52	97.39	48.12
72.02	68.43	146.54	12.04	16.32	95.01	46.7	103.18	93.15	185.08	13.78	58.48	90.28	50.33	92.89	87.73	110.3	3.29	44.2	94.45	79.54	125.75	112.88	262.52	14.76	33.01	89.76	43
147.51	141.71	248.4	7.54	39.89	96.06	57.05	77.53	70.1	241.82	12.33	32.7	90.43	28.99	128.77	124.41	268.88	8.38	29.92	96.62	46.27	127.92	125.35	165.83	6.66	29.92	97.99	75.59
108.45	103.58	276.33	12.55	37.83	95.52	37.49	87.41	77.18	202.01	11.39	24.93	88.3	38.21	60.28	55.47	183.65	8.83	17	92.02	30.21	22.38	2.83	87.89	5.51	55.02	12.66	3.22
126.2	119.94	205.87	10.13	25.16	95.04	58.26	74.01	72.43	202.81	10.23	33.16	97.87	35.71	129.83	128.36	227.65	9.94	39.89	98.87	56.39	34.75	15.94	107.49	7.39	41.96	45.86	14.83
150.92	138.38	231.54	10.03	32.84	91.69	59.77	110.82	109.02	173.11	9.79	38.08	98.38	62.98	121.99	118.17	246.42	9.35	34.79	96.87	47.95	75.37	66.8	217.67	20.94	22.44	88.63	30.69
108.31	102.61	238.75	9.32	21.08	94.74	42.98	156.59	153.5	262.8	9.79	44.71	98.02	58.41	149.13	146.23	187.9	6.43	39.21	98.06	77.83	52.69	50.66	72.77	6.4	16.32	96.15	69.61
47.04	33.22	125.79	7.85	30.95	70.62	26.41	164.86	158.86	257.85	11.53	43.33	96.36	61.61	95.37	93.16	265.87	11.66	34.39	97.68	35.04	68.61	48.44	217.26	20.32	27.14	70.61	22.3
56.4	18.25	125.11	10.07	37.4	32.35	14.58	84.25	81.19	227.06	11.06	25.16	96.36	35.76	88.04	84.11	197.01	9.11	19.48	95.53	42.69	152.29	145.97	258.64	8.94	36.61	95.85	56.44
113.56	108.24	255.84	11.9	27.05	95.31	42.31	113.26	110.11	216.24	9.21	28.53	97.22	50.92	99.6	91.78	202.12	11	21.57	92.14	45.41	69.59	61.19	103.66	4.86	29.24	87.92	59.02
127.85	122.85	221.36	9.58	26.14	96.09	55.5	84.91	81.82	178.97	8.37	14.28	96.36	45.72	103.22	101.1	270.86	11.67	15.13	97.95	37.33	128.8	121.58	284.71	8.55	29.92	94.4	42.7
55.9	30.07	213.66	12.4	43.52	53.79	14.07	116.67	115.5	146.46	5.48	48.15	99	78.86	120.82	114.68	224.04	19.8	32.85	94.92	51.19	24.93	6.19	84.8	6.22	61.21	24.82	7.29
71.06	51.58	143.02	11.38	41.5	72.59	36.07	144.27	142.03	230.94	9.3	39.89	98.44	61.5	132.04	109.29	279	16.08	34	82.77	39.17	142.57	127.66	259.78	10.35	34.68	89.54	49.14
121.48	114.31	240.92	10.28	23.66	94.1	47.45	67.35	57.96	174.46	10.85	36.72	86.07	33.22	75.99	73.05	108.07	4.88	44.2	96.13	67.59	33.19	31.31	62.55	3.04	36.72	94.32	50.05
128.08	124.99	223.57	10.71	32.01	97.59	55.91	72.19	55.94	193.19	9.8	48.71	77.49	28.95	90.81	85.95	141.01	11.98	52.96	94.65	60.95	86.96	61.91	107.04	2.84	47.46	71.2	57.84
28.95	12.12	99.32	15.96	69.47	41.87	12.21	161.34	160.79	250.64	11.32	36.45	99.66	64.15	59.3	52.2	175.85	10.16	27.2	88.04	29.69	177.13	163.4	209.34	5.69	40.58	92.25	78.06
117.52	107.37	260.26	8.9	22.96	91.36	41.25	79.53	60.4	101.2	3	48.15	75.94	59.68	45.26	11.49	109.73	7.37	41.48	25.39	10.47	67.5	63.35	158.62	15.71	35.36	93.86	39.94
83.75	82.23	221.84	8.72	21.32	98.18	37.07	110.07	108.12	166.63	7.53	35.77	98.23	64.89	107.19	103.52	165.41	12.26	18.94	96.58	62.58	79.14	72.51	237.41	11.57	20.4	91.62	30.54
74.56	62.1	226.92	10.88	16.32	83.29	27.37	70.51	57.98	217.92	11.32	17	82.23	26.6	97.47	90.77	237.89	9.61	25.84	93.13	38.16	150.59	143.96	247.89	8.99	39.44	95.59	58.07
141.89	136.53	256.62	8.09	36.18	96.23	53.2	30.25	6.3	90.35	9.91	116.96	20.83	6.97	62.36	33.37	176.53	10.99	41.48	53.5	18.9	104.4	79.62	213.99	12.58	32.06	76.26	37.21
58.38	57.69	94.32	3.23	44.2	98.82	61.17	95.8	94.41	195.23	9.15	28.2	98.56	48.36	96.52	91.31	202.62	11.81	27.51	94.6	45.06	143.69	137.51	273.14	10.21	36.72	95.7	50.34
64.07	54.19	161.84	5.9	44.88	84.57	33.48	44.93	38.95	89.83	5.29	34.39	86.69	43.36	125.38	122.2	236.04	9.84	32.41	97.46	51.77	82.82	79.48	144.01	7.39	41.53	95.96	55.19
113.41	108.01	231.06	10.92	24.68	95.24	46.74	111.88	110.81	219.74	9.03	36.72	99.04	50.43	51.95	30.9	224.31	13.78	53.5	59.48	13.78	85.76	4.2	152.03	9.09	52.45	4.9	2.76
142.32	129.61	255.53	9.97	32.64	91.07	50.72	74.44	45.07	171.03	9.94	30.27	60.55	26.35	35.38	12.2	122.22	11.31	73.92	34.48	9.98	82.88	79.09	216.42	14.2	18.3	95.43	36.55
83.54	72.49	182.67	9.98	15.64	86.77	39.68	60.51	52.59	234.4	15.87	29.92	86.9	22.44	93.42	88.63	238.9	14.81	24.64	94.87	37.1	125.75	122.45	188.14	9.49	36.82	97.37	65.08
116.87	113.1	235.39	11.39	25.34	96.77	48.05	76.01	73.88	182.22	10.74	21.76	97.21	40.55	47.87	42.31	215.01	12.98	24.35	88.38	19.68	90.12	35.7	289.89	24.55	28.53	39.61	12.31
100.35	94.37	235.04	10.53	18.97	94.04	40.15	77.49	60.89	113.78	5.42	39.44	78.58	53.51	143.23	139.27	243.47	10.06	33.79	97.23	57.2	84.25	75.78	99.2	2.75	41.48	89.94	76.39
74.38	72.21	183.83	12.47	18.36	97.07	39.28	114.21	111.4	259	15.64	29.92	97.54	43.01	80.81	76.1	218.06	11.13	21.08	94.17	34.9	140.96	133.37	241.04	11.4	38.02	94.61	55.33
101.86	78.41	199.1	10.52	29.58	76.98	39.38	145.99	138.22	187.15	9.53	24.48	94.68	73.85	157.06	153.55	186.46	7	44.71	97.76	82.35	135.54	132.55	245.79	10.97	33.7	97.8	53.93
121.96	118.94	181.77	6.88	41.96	97.52	65.43	116.15	88.03	121.71	6.23	25.84	75.79	72.33	124.11	73.91	140.84	4.04	34	59.55	52.48	82.22	73.82	133.15	5.41	46.77	89.78	55.44
104.51	89.68	180.25	14.37	78.41	85.81	49.75	96.21	94.04	180.14	10.45	17.6	97.75	52.2	50.69	21.8	102.15	11.09	46.62	43	21.34	41.36	32.56	157.64	8.33	28.56	78.71	20.65
68.64	61.65	132.41	7.51	42.24	89.81	46.56	62.42	58.9	191.73	12.83	19.48	94.36	30.72	12.84	4.28	36.19	1.98	106.85	33.31	11.82	147.44	141.9	218.33	8.55	30.62	96.24	64.99
97.18	52.68	198.99	16.96	28.89	54.21	26.48	116.16	113.42	236.44	11.17	39.6	97.64	47.97	116.09	111.36	174.06	8.36	21.08	95.92	63.98	54.37	43.43	182.2	10.57	45.56	79.87	23.84
107.17	104.78	203.5	10.91	23.8	97.77	51.49	83.89	64.73	173.88	8.33	34.19	77.16	37.23	76.74	70.02	201.84	15.08	18.36	91.24	34.69	32.29	9.28	58.34	5.83	33.32	28.73	15.9
109.88	102.57	208.45	23.65	27.14	93.35	49.21	103	97.32	215	11.41	19.15	94.49	45.27	126.87	122.51	242.28	7.53	30.61	96.57	50.57	134.43	124.32	215.18	11.42	32.01	92.49	57.78
53.44	47.36	96.77	6.58	42.94	88.63	48.95	161.93	157.09	191.81	13.27	29.24	97.01	81.9	106.49	100.56	227.12	10.42	26.18	94.43	44.27	34.89	25.1	83.39	4.69	40.8	71.94	30.11
112.15	108.32	223.65	13.21	23.12	96.59	48.43	78.55	69.17	203.81	12.64	22.44	88.07	33.94	67.83	55.04	192.82	11.3	16.32	81.14	28.55	83.39	72.78	162.42	7.9	33.32	87.27	44.81
99.18	35.43	197.86	9.62	32.01	35.72	17.91	39.07	22.96	125.5	7.34	46.62	58.76	18.29	104.55	102.09	143.64	6	46.08	97.65	71.07	60.56	37.54	112.08	6.28	35.2	61.98	33.49
92.28	90.02	186.79	13.56	14.96	97.55	48.19	70.41	40.34	141.98	7.67	37.57	57.29	28.41	151.24	134.44	262.09	9.69	35.49	88.89	51.29	76.78	69.4	128.86	5.45	37.83	90.38	53.86
113	104.52	227.24	11.86	35.2	92.5	46	85.81	83.34	120.73	4.91	32.38	97.12	69.03	93.94	44.06	164.7	10.23	34.79	46.9	26.75	154.67	152.14	213.69	10.49	21.08	98.37	71.2
37.74	11.26	85.59	6.99	40.83	29.84	13.16	79.8	61.67	209.97	10.02	35.08	77.28	29.37	143.67	139.49	295.92	13.86	35.36	97.09	47.14	65.88	53.33	207.29	9.26	23.66	80.95	25.73
42.82	35.39	81.3	4.41	42.84	82.63	43.52	65.54	58.17	158.33	10.06	27.33	88.75	36.74	142.37	136.63	250.67	13.22	31.28	95.97	54.5	95.81	92.82	176.41	9.47	14.96	96.89	52.62
81.71	80.25	257.74	9.41	34	98.21	31.14	99.17	95.74	190.68	11.83	21.08	96.54	50.21	70.03	46.81	223.46	13.09	52.27	66.84	20.95	143.23	137.05	240.22	8.07	29.22	95.69	57.05
85.56	62.65	227.95	11.12	18.36	73.23	27.49	90.46	85.93	242.43	9.26	30.95	94.99	35.44	71.13	51.89	193.43	9.96	30.27	72.95	26.82	119.85	114.46	296.98	10.97	25.45	95.5	38.54
119.96	113.53	210.06	9.74	21.08	94.64	54.05	43.89	39.59	61.97	2.94	37.14	90.21	63.89	63.79	47.78	185.54	10.71	31.64	74.91	25.75	100.69	99.18	143.31	4.73	25.05	98.5	69.21
143.74	140.74	219.35	9.93	32.7	97.91	64.16	58.75	9.45	127.09	8.72	54.91	16.08	7.43	147.31	143.11	273.75	11.57	33.32	97.15	52.28	71.55	56.79	110.37	4.01	41.27	79.37	51.46
141.13	137.07	256.17	10.65	38.27	97.12	53.51	94.74	89.98	273.83	11.78	23.12	94.97	32.86	59.1	32.22	149.44	10.44	40.12	54.53	21.56	38.21	16.29	92.34	7.82	37.4	42.64	17.65
71.06	64.06	214.74	9.73	25.74	90.15	29.83	82.28	72.63	196.05	8.46	38.52	88.27	37.05	24.74	6.97	76.85	4.89	82.28	28.15	9.06	89.17	78.79	178.58	4.23	53.97	88.37	44.12
71.66	61.59	176.93	9.47	24.48	85.95	34.81	171.25	168.09	234.33	9.12	42.64	98.15	71.73	133.64	129.71	219.94	8.88	35.36	97.06	58.98	68.5	57.13	197.57	10.92	28.86	83.4	28.92
78.97	44.76	201.49	11.36	32.64	56.68	22.21	126.14	109.56	187.73	5.26	48.15	86.86	58.36	158.71	154.35	230.52	7.84	39.89	97.25	66.96	130.37	124.82	224.07	8.05	26.82	95.74	55.71
67.89	44.18	216.02	10.31	46.24	65.08	20.45	23.55	13.85	53.95	4.68	23.12	58.82	25.67	83.28	79.9	214.19	10.94	21.82	95.94	37.3	52.17	27.25	104.34	3.3	42.64	52.24	26.12
99.06	96.04	230.93	8.85	22.27	96.95	41.59	139.98	130.39	250.4	11.98	39.2	93.15	52.07	63.55	45.18	167.68	9.58	32.01	71.1	26.95	167.63	166.27	248.1	11.56	33.82	99.19	67.02
127.87	124.75	247.82	7.52	32.01	97.56	50.34	185.29	182.94	311.57	20.99	32.33	98.73	58.71	72.04	63.39	197.75	9.25	16.9	87.99	32.05	130.39	125.96	184.17	8.35	23.12	96.6	68.39
122.31	113.63	301.3	9.44	29.92	92.9	37.71	157.39	153.46	287.44	10.48	32.33	97.5	53.39	119.04	109.63	225.82	22.42	25.34	92.09	48.55	109.43	88.83	203.17	14.47	29.92	81.17	43.72
92.7	86.74	222.49	8.83	19.26	93.57	38.98	60.59	35.61	206.61	11.14	52.84	58.78	17.24	148.49	144.79	214.84	11.36	33.98	97.51	67.39	70.47	53.15	141.34	9.6	37.97	75.43	37.61
146.83	143.9	201.84	6.96	37.83	98.01	71.29	169.68	167.48	259.45	10.18	36.72	98.71	64.55	124.53	118.28	237.62	10.72	26.52	94.98	49.78	98.88	96.04	191.5	9.27	19.72	97.13	50.15
84.69	80.9	99.95	3.83	41.22	95.53	80.94	95.88	92.09	203.13	10.6	19.04	96.06	45.34	134.61	130.65	309.21	15.32	38.96	97.06	42.25	76.84	16.86	120.68	31.12	385.21	21.94	13.97
132.47	121.72	216.66	17.11	27.46	91.89	56.18	148.73	110.47	243.75	18.81	36.45	74.27	45.32	66.26	31.43	198.51	11.37	57.09	47.43	15.83	139.67	138.2	249.51	11.51	34	98.95	55.39
112.67	107.26	231.88	10.85	27.2	95.2	46.26	147.65	146.62	188.28	8.73	39.89	99.3	77.87	58.06	22.01	154.23	15.74	43.52	37.9	14.27	132.06	128.12	253.22	9.4	35.08	97.01	50.59
84.37	77.2	230.29	9.98	26.52	91.5	33.52	87.23	82.13	104.51	4.28	38.52	94.16	78.59	87.56	65.71	240.39	10.02	37.83	75.05	27.33	48.68	29.15	127.57	14.47	16.83	59.89	22.85
65.99	61.03	187.96	10.34	14.96	92.48	32.47	70.11	64.56	207.92	9.1	40.12	92.08	31.05	140.88	137.69	275.84	11.46	31.28	97.74	49.92	125.86	119.68	255.92	10.46	33.4	95.09	46.77
96.54	92.61	272.58	11.54	19.95	95.93	33.97	85.45	72.96	186.25	10.77	25	85.39	39.17	106.68	98.67	256.36	12.79	30.95	92.49	38.49	53	38.6	122.18	6.33	46.08	72.84	31.6
144.55	137.95	213.48	9.49	33.01	95.44	64.62	144	140.56	293.51	12.06	40.25	97.61	47.89	142.05	138.94	220.19	10.69	30.26	97.81	63.1	47.07	29.4	196.26	8.45	61.95	62.45	14.98
128.45	120.21	275.74	11.5	27.83	93.58	43.6	101.28	96.09	175.83	11.01	39.89	94.88	54.65	81.82	72.44	222.71	9.64	34	88.53	32.52	69.17	67.25	91.18	3.47	36.04	97.23	73.75
96.92	92.83	205.72	11.17	21.08	95.78	45.12	18.17	7.94	41.81	7.57	55.91	43.69	18.99	89.24	79.02	213.2	11.4	20.66	88.55	37.06	78.21	71.33	204.64	9.68	28.53	91.21	34.86
116.09	108.92	158.37	16.91	22.7	93.83	68.78	17	9.44	52.69	3.27	50.9	55.56	17.92	125.97	117.16	268.69	8.99	32.33	93.01	43.61	97.62	96.25	190.83	9.18	41.05	98.59	50.44
101.94	97.77	199.07	8.49	19.38	95.9	49.11	121.27	114.11	268.43	9.86	32.38	94.1	42.51	89.79	87.46	112.85	5.91	46.77	97.41	77.5	79.71	70.92	177.39	8.8	40.8	88.98	39.98
156.89	145.22	228.97	11.08	34.91	92.56	63.42	121.94	118.99	195.32	10.7	22.96	97.59	60.92	158.61	155.21	240.5	8.12	32.29	97.86	64.54	61.29	53.1	246.91	8.73	28.16	86.65	21.51
36.88	7.94	82.56	7.71	26.52	21.54	9.62	48.33	32.28	92.63	8.82	30.67	66.8	34.85	75.64	67.99	225.98	12.38	23.12	89.89	30.09	59.99	54.82	135.05	6.14	44.5	91.39	40.6
84.95	80.87	134.94	7.21	32.64	95.19	59.93	100.42	95.29	187.92	9.1	18.52	94.88	50.71	84.82	63.84	129.92	13.01	85.68	75.26	49.13	25.59	22.26	55.19	3.57	23.07	86.98	40.33
79.54	76.71	133.98	5.81	39.06	96.44	57.26	46.39	16.88	106.87	12.97	48.28	36.39	15.79	60.42	30.34	207.65	11.43	63.92	50.21	14.61	23.28	9.25	50.53	6.29	53.58	39.73	18.31
108.72	68.42	208.43	21.6	19.26	62.93	32.83	156.82	154.9	241.42	9.16	42.74	98.78	64.17	129.44	125.89	196.26	8.4	35.08	97.26	64.15	15.85	4.65	65.31	18.14	60.71	29.36	7.13
72.23	42.52	215.11	11.96	49.64	58.86	19.76	55.19	52.58	128.11	6.78	31.68	95.27	41.04	94.68	86.21	185.31	7.5	41.98	91.06	46.52	12.7	1.04	53.3	21.69	139.24	8.16	1.95
122.92	112.02	265.41	19.64	37.14	91.13	42.21	37.94	33.47	65.39	2.46	41.75	88.22	51.18	100.31	94.54	216.75	10.68	20.4	94.25	43.62	111.52	106.59	250.39	19.47	24.48	95.57	42.57
131	128.32	228.91	11.96	30.98	97.95	56.06	47.71	43.11	206.02	9.16	30.6	90.35	20.93	132.83	131.96	261.39	10.37	39.3	99.35	50.48	137.35	134.36	271.19	9.25	39.89	97.82	49.54
98.73	95.11	260.77	11.2	27.88	96.34	36.47	93.96	91.86	203.88	9.66	21.08	97.76	45.06	44.57	9.42	128.74	9.62	108.12	21.14	7.32	91.32	87.63	205	10.92	21.76	95.96	42.75
109.2	107.36	234.67	8.17	24.48	98.31	45.75	98.49	95.55	266	9.1	29.58	97.02	35.92	101.62	93.99	161.9	8.89	31.96	92.49	58.05	81.66	10.36	138.73	9.59	40.14	12.69	7.47
26.77	17.02	63.2	7.62	49.03	63.59	26.94	34.27	12.38	91.86	7.48	61.93	36.12	13.48	134.19	129.13	286	8.64	33.7	96.23	45.15	42.96	18.47	159.49	11.49	63.24	43	11.58
34.91	10.35	162.21	20.4	63.96	29.65	6.38	32.26	16.36	108.07	10.93	29.92	50.73	15.14	94.63	90.07	155.12	7.33	32.41	95.19	58.07	57.26	20.58	111.69	9.19	53.65	35.93	18.42
156.1	151.89	266.86	9.19	34.39	97.3	56.92	96.29	36.5	204.55	12.55	62.59	37.91	17.84	116.04	110.91	232.54	10.93	22.2	95.58	47.69	74.48	71.36	143.45	8.97	16.32	95.81	49.75
135.35	126.82	240.45	8.3	33.7	93.7	52.74	76.4	70.23	124.19	5.91	46.24	91.91	56.54	118.47	10.15	187.43	11.73	37.57	8.57	5.42	97.92	94.85	209.81	11.25	34.68	96.86	45.21
103.92	101.12	200.3	9.24	27.88	97.3	50.48	38.72	21.42	100.52	6.93	69.32	55.31	21.31	13.63	6.15	44.58	3.73	38.96	45.12	13.8	20.35	7.21	58.84	6.2	106.61	35.41	12.25
118.88	114.5	228.8	8.95	26.52	96.32	50.04	121.58	116.97	257.24	14.42	40.41	96.21	45.47	122.18	112.64	248.45	9.74	30.61	92.18	45.34	54.98	6.22	95.6	15.97	56.4	11.31	6.5
75.49	74.49	160.42	9.74	35.67	98.67	46.43	145.8	126.71	274.92	10.84	40.58	86.9	46.09	29.93	16.87	162.56	12	15.84	56.36	10.38	31.33	23.25	63.01	14.85	53.61	74.22	36.91
110.35	104.37	245.73	10.56	23.94	94.59	42.47	60.37	53.48	86.39	2.97	42.64	88.58	61.91	132.59	124.37	230.64	9.17	31.64	93.81	53.93	56.46	30.05	151.03	9.64	56.44	53.22	19.9
147.94	144.47	212.48	18.42	36.82	97.65	67.99	80.63	68.76	119	3.79	50.9	85.28	57.78	93.1	89.38	141.18	11.15	41.27	96	63.31	142.13	141.65	245.3	11.02	40.12	99.66	57.75
119.67	116.36	172.68	8.64	25.45	97.24	67.38	85.07	83.31	172.53	10.39	18.5	97.94	48.29	122.22	114.68	163.2	6.44	35.08	93.83	70.27	150.4	149.26	222.84	9.47	36.04	99.24	66.98
25.76	21.71	41.35	8.94	166.61	84.3	52.51	55.59	49.58	100.72	4.45	44.88	89.2	49.23	124.27	120.33	293.11	9.76	33.79	96.83	41.05	45.62	17.37	149.22	11.63	52.27	38.09	11.64
114.66	107.63	157.07	4.97	53.27	93.87	68.52	150.13	143.42	213.32	4.07	49.15	95.53	67.23	129.41	116.39	194.75	8.78	26.44	89.94	59.76	154.72	152.26	207.96	6.99	42.64	98.41	73.22
94.34	87.18	242.09	11.11	19.72	92.41	36.01	106.18	103.77	254.46	8.76	31.64	97.73	40.78	127.02	108.21	177.4	8.76	32.01	85.19	61	90.56	79.48	148.22	20.76	158.44	87.77	53.63
87.47	84.39	158.53	8.22	15.81	96.48	53.23	72.46	67.68	198.69	10.49	23.8	93.41	34.06	111	104.06	160.27	10.41	10.88	93.75	64.93	134.72	133.57	194.09	11.27	26.44	99.15	68.82
135.99	130.13	271.18	8.97	36.88	95.69	47.99	56.75	15.07	216.72	12.27	52.27	26.56	6.95	135.41	132.25	241.51	8.2	28.89	97.67	54.76	37.19	22.79	101.32	24.34	124.55	61.27	22.49
22.2	11.76	55.94	3.38	41.48	52.98	21.02	98.73	93.7	158.08	9.99	13.6	94.9	59.27	42.27	41.24	51.02	1.59	36.88	97.58	80.84	40.16	18.78	153.58	8.66	35.08	46.75	12.23
88.01	70.23	245.65	10.88	36.72	79.8	28.59	87.18	80.78	215.36	9.28	27.46	92.66	37.51	74.94	69.48	186.18	9.14	16.51	92.71	37.32	92.22	87.79	149.02	5.67	46.13	95.19	58.91
80.05	74.53	201.8	8.32	21.76	93.09	36.93	41.19	35.73	105.77	7.94	38.96	86.75	33.78	73.78	44.66	217.82	9.59	48.15	60.54	20.51	94.44	91.42	241.28	15.53	29.22	96.8	37.89
47.74	26.18	69.67	4.88	28.56	54.84	37.57	106.11	103.98	147.16	16.32	26.14	98	70.66	82.64	77.76	226.48	9.5	14.96	94.1	34.33	156.03	153.36	230.93	12.15	35.05	98.29	66.41
62.25	56.57	133.15	8.09	17	90.87	42.48	52.76	16.89	130.11	9.63	53.5	32.01	12.98	53	50.24	85.08	3.31	43.65	94.79	59.05	95.43	91.74	131.66	11.2	36.33	96.14	69.68
127.41	120.07	210.64	9.61	23.39	94.24	57	28.04	8.69	69.01	8.29	63.28	30.99	12.59	99.25	94.98	223.82	8.19	27.51	95.7	42.44	89.33	86.75	162.23	8.6	36.45	97.11	53.47
63.53	50.48	116.98	7.62	41.48	79.46	43.15	62.74	60.92	148.17	8.42	33.4	97.1	41.12	60.39	39.66	207.91	12.32	33.7	65.67	19.08	76.71	72.4	106.9	4.61	51.49	94.38	67.72
48.93	28.02	194.25	8.17	46.92	57.27	14.43	63.24	42.93	133.24	16.64	118.99	67.87	32.22	149.77	143.78	275.39	8.67	30.95	96	52.21	89.04	75.85	170.83	22.16	24.1	85.18	44.4
116.44	110.5	303.4	9.48	28.53	94.9	36.42	46.22	46.01	56.86	2.32	44.2	99.55	80.92	81.92	79.05	272.87	9.61	37.57	96.5	28.97	150.92	147.86	210.86	8.53	29.54	97.98	70.12
120.79	117.75	188.99	9.96	26.59	97.48	62.3	93.64	88.32	242.07	8.5	31.75	94.31	36.49	151.33	149.28	237.84	10.94	38.52	98.65	62.76	86.68	67.76	103.89	3.35	46.77	78.18	65.23
104.17	95.9	231.57	16.29	19.26	92.07	41.41	156.46	153.98	243.18	8.62	36.27	98.41	63.32	74.04	56.1	166.09	10.31	24.35	75.77	33.78	175.43	172.81	237.93	8.46	34.39	98.5	72.63
144.6	139.57	246.35	10.32	30.6	96.52	56.66	88.66	85.54	203.09	9.43	23.39	96.47	42.12	60.09	52.9	211.07	10.15	32.7	88.04	25.06	24.81	13.26	80.35	29.77	62.65	53.47	16.51
103.66	90.97	221.6	8.55	29.58	87.75	41.05	81.81	60.79	189.37	11.1	48.01	74.31	32.1	24.75	9.05	69.61	7.36	43.44	36.55	12.99	68.31	62.11	216.64	12.25	27.2	90.91	28.67
84.01	82.25	190.85	10.48	26.82	97.91	43.1	82.88	79.71	198.51	11.37	33.4	96.17	40.15	95.73	93.18	181.71	8.35	19.48	97.33	51.28	40.67	10.25	102.7	11.59	179.51	25.21	9.98
120.09	109.87	245.79	9.13	21.76	91.49	44.7	67.76	49.65	238.48	9.69	47.31	73.28	20.82	34.16	12.76	81.22	6.48	50.32	37.35	15.71	23.49	13.15	86.46	8.63	43.76	55.96	15.2
45.53	24.23	58.94	3.62	27.88	53.21	41.11	20.86	11.27	61.3	7.1	33.01	54.02	18.38	53.24	40.13	194.76	9.16	41.05	75.37	20.6	31.36	25.6	68.93	8.61	46.77	81.61	37.13
94.88	86.93	257.1	9	40.13	91.62	33.81	122.03	117.03	215.36	10.17	30.95	95.9	54.34	31.46	7.65	97.63	5.77	29.58	24.31	7.83	65.59	50.08	125.06	8.78	39.42	76.34	40.04
70.74	41.06	249.97	12.08	37.14	58.05	16.43	44.64	11.94	99.22	7.18	85	26.75	12.04	39.41	11.2	88.66	6.71	87.04	28.41	12.63	100.45	50.4	145.13	8.33	37.2	50.18	34.73
126.65	122.72	219.43	7.87	28.53	96.89	55.92	31.7	26.2	74.57	6.54	36.72	82.65	35.14	129.66	126.5	278.55	12.42	42.64	97.56	45.41	68.08	50.22	176.07	12.42	25.74	73.76	28.52
42.77	42.16	56.76	2.68	36.04	98.58	74.28	52.77	35.28	116.2	13.45	30.6	66.86	30.36	57.1	51.03	182.4	9.04	29.24	89.37	27.97	60.26	53.98	103.06	6.22	46.77	89.58	52.38
70.77	49.63	158.85	9.58	39.66	70.12	31.24	81.94	70.58	193.18	5.84	50.21	86.13	36.54	22.56	10.67	71.59	5.31	76.03	47.3	14.9	167.82	160.32	271.29	11.68	31.96	95.53	59.09
75.79	69	229.46	11.11	25.84	91.04	30.07	162.29	146.83	260.64	9.41	29.58	90.47	56.34	53.84	43.85	127.52	5.02	52.88	81.44	34.38	53.03	47.75	84.6	6.05	38.76	90.05	56.45
93.55	91.38	237.66	9.65	27.14	97.68	38.45	53.99	26.2	143.61	9.62	63.4	48.53	18.24	21.38	8.36	63.79	3.68	44.47	39.11	13.11	104.36	100.7	166.32	11.18	25.84	96.5	60.55
47.4	11.89	165.62	11.19	74.97	25.08	7.18	87.43	80.69	203.76	9.35	31.96	92.29	39.6	151.89	150.34	230.56	8.99	38.94	98.98	65.21	87.78	85.08	147.12	17.03	24.76	96.92	57.83
56.02	37.44	192.82	10.71	46.08	66.82	19.42	147.71	143.08	266.87	8.25	40.8	96.86	53.61	160.95	159.52	229.35	9.14	37.11	99.11	69.55	60.24	48.08	101.44	4.21	42.84	79.82	47.4
136.36	129.17	236.14	10.59	36.18	94.73	54.7	138.34	134.01	252.07	14.15	29.58	96.87	53.16	72.85	55.21	235.45	21.2	31.34	75.79	23.45	151.53	143.63	210.27	11.78	29.24	94.78	68.31
13.81	10.12	27.88	2.23	109.36	73.3	36.31	58.53	48.2	200.82	13.33	41.96	82.35	24	94.14	75	242.21	13.03	24.76	79.67	30.97	151.87	134.16	286.92	16.37	42.3	88.34	46.76
121.77	119.41	159.44	9.46	25.45	98.06	74.89	134.81	130.91	252.58	12.51	37.57	97.11	51.83	44.01	14.74	115.39	11.1	68.68	33.5	12.78	87.43	81.15	189.1	11.51	18.47	92.82	42.91
114.62	112.51	158.74	7.85	24.35	98.16	70.88	148.02	143.07	261.24	9.23	36.45	96.65	54.76	76.89	65.49	245.5	11.62	34.68	85.17	26.68	131.01	127.62	209	12.39	27.13	97.41	61.06
68.85	64.25	169.86	11.48	21.76	93.32	37.83	116.91	115.03	232.59	9.02	35.08	98.39	49.46	47.53	10.31	143.68	8.72	66.17	21.7	7.18	45.28	6.66	207.89	14.18	92.48	14.71	3.2
55.07	23.84	151.79	13.04	29.46	43.3	15.71	90.71	75.32	120.15	7.7	34.39	83.04	62.69	70.1	65.17	197.43	11.96	18.36	92.98	33.01	146.49	144.79	197.36	9.02	39.44	98.84	73.36
75.7	67.85	233.71	10.53	16.32	89.63	29.03	41.57	28.24	130.87	11.18	31.64	67.93	21.58	39.12	12.69	82.89	9.41	53.65	32.44	15.31	42.88	41.17	95.92	4.18	38.76	95.99	42.92
40.15	13.72	88.08	10.47	51.39	34.16	15.57	108.53	90.25	165.12	9.73	26.44	83.16	54.66	49.94	21.75	171.84	13.82	29.56	43.56	12.66	43.2	18.63	106.07	8.09	45.51	43.12	17.56
43.32	33.88	175.34	9.12	22.53	78.22	19.32	46.91	13.33	80.3	16.01	80.92	28.41	16.6	80.22	78.44	195.44	13.38	21.57	97.79	40.14	25.27	16.66	119.33	5.37	44.36	65.91	13.96
78.36	70.3	196.81	11.88	21.08	89.72	35.72	150.18	149.72	251.84	10.31	42.84	99.69	59.45	68.91	63.14	185.74	11.76	25.16	91.63	33.99	26.53	9.97	58.76	6.61	45.76	37.6	16.97
62.31	60.05	154.21	9.91	19.71	96.37	38.94	113.61	109.83	254.95	12.54	37.83	96.68	43.08	107.85	105.86	266.3	12.59	41.75	98.16	39.75	66.68	59.47	94.52	3.84	40.58	89.18	62.91
72.85	65.73	204.36	15.82	36.18	90.23	32.17	49.41	44.72	173.07	9.37	34	90.51	25.84	36.38	3.32	123.34	7.87	89.25	9.13	2.69	100.08	96.81	188.05	7.71	22.7	96.73	51.48
95.2	93.83	153.66	10.14	21.08	98.55	61.06	162.89	159.47	217.07	12.01	23.8	97.9	73.47	49.6	19.66	104.07	5.76	36.04	39.63	18.89	148.71	146.25	188.63	9.8	20.66	98.35	77.53
88.31	86.69	150.92	8.53	21.32	98.17	57.44	143.95	142.14	223.44	11.58	36.61	98.74	63.62	162.76	146.52	215.93	18.68	30.95	90.02	67.85	159.5	144.53	196.11	11.94	38.72	90.61	73.7
71.29	65.09	170.99	9.12	20.66	91.3	38.07	129.8	128.21	254.99	11.77	36.72	98.78	50.28	125.56	122.18	244.45	9.83	30.98	97.31	49.98	156.57	155.08	271.09	17.48	46.77	99.05	57.2
65.38	63.98	119.99	9.4	17	97.85	53.32	26.61	8.88	63.37	4.44	58.45	33.36	14.01	137.36	131.04	214.68	7.32	53.04	95.4	61.04	91.19	77.68	148.07	17.9	27.14	85.18	52.46
153.32	151.97	272.94	10.6	41.5	99.12	55.68	56.1	29.33	198.94	11.21	47.56	52.28	14.74	72.36	40.76	160.7	10.8	20.85	56.32	25.36	120.37	108.02	155.19	13.29	50.79	89.74	69.6
41.34	4.56	94.01	7.96	137.19	11.03	4.85	92.7	91.34	210.54	10.06	41.96	98.53	43.38	98.95	96.97	204.41	10.4	18.57	98	47.44	51.13	14.83	142.2	11.48	52.88	29	10.43
156.36	153.04	192.78	11.29	22.7	97.88	79.39	54.23	47.83	211.44	11.86	18.36	88.2	22.62	64.81	25.12	165.3	9.99	55.76	38.76	15.2	44.85	35.49	176.33	8.5	35.9	79.13	20.13
31.53	27.64	75.74	6.84	34	87.68	36.5	51.2	45.12	182.72	10.73	27.88	88.13	24.69	61.99	57.55	90.16	3.48	42.64	92.84	63.83	56.75	39.31	168.87	10.86	30.67	69.27	23.28
39.31	6.32	115.77	17.94	155.76	16.09	5.46	78.56	75.85	199.47	14.21	23.39	96.56	38.03	87.09	49.31	118.58	3.47	48.15	56.62	41.58	68.59	66.46	90.8	4.98	36.33	96.9	73.2
97.31	95.61	168.17	11.21	20.4	98.25	56.85	120	117.4	212.02	9.63	27.54	97.83	55.37	94.27	61.76	252.73	14.98	35.62	65.51	24.44	24.23	7.03	137.16	8.68	70.84	29.03	5.13
35.69	20.87	81.7	5.12	37.83	58.46	25.54	126.84	124.27	234.01	10.4	39.44	97.97	53.1	47.55	18.91	91.73	13.16	278.59	39.77	20.61	84.12	79.09	168.45	12.86	23.35	94.02	46.95
168.26	167.08	197.4	10.95	26.4	99.3	84.64	79.71	50.24	216.55	8.42	41.32	63.03	23.2	145.83	140.05	189.81	12	25.39	96.04	73.78	50.22	33.76	172.29	12.98	46.08	67.22	19.59
88.6	83.39	202.79	27.02	32.7	94.12	41.12	63.09	46.6	110.18	13.23	36.45	73.87	42.3	20.81	8.47	66.95	7.28	25.16	40.7	12.65	105.68	87.27	135.85	4.56	48.15	82.58	64.24
113.47	110.73	227.67	10.38	24.51	97.58	48.63	155.35	153.04	241.45	10.86	30.61	98.51	63.39	93.55	11.01	187.19	25.15	427.91	11.76	5.88	69.42	49.98	119.5	5.79	33.4	72	41.83
63.56	59.6	154.2	12.53	10.88	93.77	38.65	98.91	95.71	201.25	9.56	25.28	96.76	47.56	111.29	59.19	187.95	13.36	23.8	53.19	31.49	36.82	33.4	61.99	3.15	38.08	90.72	53.88
65.34	60.82	164.64	10.58	29.22	93.07	36.94	50.49	25.67	124.22	8.07	35.08	50.85	20.67	103.21	25.8	212.75	18.66	21.08	24.99	12.13	58.3	56.39	97.78	5.84	27.88	96.71	57.67
41.6	26.83	100.59	4.76	46.24	64.49	26.68	149.39	148.35	223.56	9.7	31.72	99.31	66.36	138.32	134.94	258.3	10.44	34.43	97.55	52.24	137.62	137.02	273.9	10.02	37.14	99.57	50.03
46.15	10.67	185.31	11.53	63.24	23.11	5.76	105.27	89.91	172.39	15.44	35.77	85.41	52.16	85.8	80.24	198.1	11.23	21.08	93.53	40.51	67.8	50.61	97.83	3.66	47.31	74.64	51.73
30.21	12.8	90.19	8.78	54.21	42.36	14.19	136.31	134.56	289.7	10.91	44.02	98.72	46.45	34.47	6.3	164.67	9.54	88	18.29	3.83	146.62	142.53	251.74	12.23	37.83	97.21	56.62
98.58	94.68	182.35	10.13	19.26	96.05	51.92	144.23	141.38	234.19	9.21	35.77	98.02	60.37	116.56	109.88	249.48	9.9	28.56	94.27	44.04	76.8	70.82	110.71	8.77	27.2	92.21	63.97
125.96	121.9	176.36	8.01	21.08	96.78	69.12	157.2	150.46	291.8	12.32	37.4	95.72	51.56	74.07	47.55	182.31	17.88	54.4	64.19	26.08	141.01	123.76	218.11	11.02	42.64	87.77	56.74
75.13	70.97	153.26	10.73	30.95	94.47	46.31	73.99	66.5	195.93	10.48	36.45	89.87	33.94	67.31	64.52	184.8	11.85	21.32	95.86	34.92	75.01	71.3	163.01	9.25	16.43	95.05	43.74
99.49	94.02	235.75	11.62	19.72	94.5	39.88	98.95	97.19	206.05	11.86	24.48	98.22	47.17	52.87	28.16	126.55	8.28	50.32	53.27	22.26	52.57	26.88	126.62	9.77	21.37	51.14	21.23
70.88	61.82	189.27	12.53	13.6	87.23	32.66	47.12	30.44	133.67	7.33	64.06	64.59	22.77	83.03	71.8	174.06	7.59	31.64	86.47	41.25	24.96	20.4	54.02	3.48	46.92	81.73	37.76
44.34	27.7	82.18	6.62	45.39	62.46	33.7	66.25	61.64	106.92	4.04	41.58	93.04	57.65	167.73	162.15	297.32	10.24	35.08	96.67	54.54	44.62	40.23	80.08	4.02	39.44	90.18	50.24
71.97	60.1	108.04	4.4	37.14	83.51	55.63	68.79	60.19	217.12	13.27	40.8	87.49	27.72	82.17	78.23	273.67	10.44	28.2	95.21	28.58	142.01	126.66	198.26	6.76	46.77	89.19	63.88
84.6	78.32	227.97	9.01	38.97	92.57	34.35	69.7	65.74	150.19	12.7	13.07	94.32	43.77	139.13	135.18	268.74	9.52	43.33	97.16	50.3	70.19	68.67	90.22	4.19	38.76	97.83	76.11
32.46	15.72	82.89	9.9	44.88	48.44	18.97	27.84	10.92	79.34	9.73	139.16	39.21	13.76	24.81	11.33	112.28	7.59	73.05	45.67	10.09	105.68	88.8	200.81	4.95	51.58	84.02	44.22
47.3	44.9	79.69	3.71	42.84	94.92	56.34	163.91	161.98	209.95	14.15	24.76	98.83	77.15	81.12	79.29	195.84	8.75	36.18	97.74	40.49	90.61	81.51	142.7	11.68	44.2	89.96	57.12
51.8	33.5	111.23	7.43	42.84	64.68	30.12	63.2	50.66	173.44	9.07	22.8	80.15	29.21	51.68	49.48	142.44	10.41	26.14	95.74	34.74	37.55	12.19	82.82	7.65	55.76	32.46	14.71
71.91	61.28	180.18	16.28	11.97	85.22	34.01	63.79	50.81	187.3	13.27	17	79.64	27.13	92.08	83.09	186.82	8.16	19.72	90.24	44.47	61.07	44.75	213.06	11.99	40.8	73.27	21
30.47	23.16	99.5	5.65	50.21	75.99	23.27	129.95	126.63	239.61	6.83	31.63	97.44	52.85	91.49	88.82	225.64	11.63	41.27	97.08	39.36	129.39	127.12	230.77	12.33	35.15	98.25	55.09
51.62	46.67	113.44	5.01	45.92	90.4	41.14	182.9	178.42	214.54	10.95	35.49	97.55	83.16	168.56	165.59	262.19	11.68	42.44	98.24	63.16	67.32	36.76	124.58	8.66	42.16	54.6	29.5
57.92	55.51	84.96	4.46	50.21	95.85	65.34	146.99	144.15	229.18	11.12	38.27	98.07	62.9	162.49	158.86	205.73	8.25	42.74	97.76	77.22	74.19	71.19	128.45	4.1	46.08	95.96	55.43
98.28	90.54	183.53	11.01	17.1	92.12	49.33	111.58	109.34	230.17	9.57	38.93	97.99	47.5	103.87	73.01	131.35	14.42	36.88	70.29	55.58	148.92	147.74	205.99	7.99	41.48	99.2	71.72
157.19	153.99	253.9	12.47	29.53	97.97	60.65	161.35	158.98	216.72	11.49	24.64	98.53	73.36	153.92	152.08	190.73	12.66	28.58	98.81	79.74	20.88	8.78	68.7	6.42	44.19	42.05	12.78
14.39	10.73	29.16	9.7	108.65	74.6	36.8	61.21	46.31	156.34	8.83	45.56	75.66	29.62	83.89	81.98	105.75	3.73	41.96	97.72	77.52	139.65	135.51	259.13	12.68	46.14	97.03	52.29
18.11	9.5	96.68	10.13	16.32	52.47	9.83	42.23	8.67	151.36	12.79	93.32	20.52	5.73	32.45	3.46	67.51	8.21	78.08	10.65	5.12	55.25	51.99	231.21	10.49	23.8	94.1	22.49
73.41	53.88	109.53	6.75	32.33	73.4	49.19	145.73	143.51	207.73	7.91	29.24	98.48	69.08	25.89	4.56	92.65	6.75	93.08	17.63	4.93	142.17	137.55	238.48	10.59	44.2	96.76	57.68
89.81	52.54	203.75	16.03	31.07	58.5	25.79	41.49	10.11	92.37	10.9	78.2	24.38	10.95	37.9	23.92	142.42	10.46	62.59	63.12	16.8	156.5	152.76	216.06	9.87	34.33	97.61	70.7
73.79	66.73	108.07	6.21	41.27	90.43	61.75	60.21	58.34	189.81	8.49	26.14	96.89	30.74	89.57	85.16	266.93	12.18	31.28	95.08	31.9	128.97	127.73	204.53	12.37	39.89	99.04	62.45
40.87	11.56	121.66	28.28	125.38	28.29	9.5	172.41	166.97	277.05	11.02	37.14	96.85	60.27	37.16	29.67	143.4	19.56	62.14	79.84	20.69	129.51	72.39	254.29	10.25	34.39	55.9	28.47
55.45	28.95	101.42	9.67	36.45	52.21	28.54	31.34	21.39	58.05	2.85	39.44	68.25	36.84	72.42	71.14	88.08	2.43	44.13	98.24	80.77	164.84	163.33	228.44	9.86	34.68	99.08	71.5
23.21	7.4	73.1	4.7	76.16	31.87	10.12	42.35	13.36	143.54	9.31	87.72	31.56	9.31	111.22	101.46	145.23	3.84	39.64	91.23	69.86	104.82	50.84	230.17	19.61	45.69	48.51	22.09
106.54	47.43	205.75	17.62	37.87	44.52	23.05	64.49	58.28	205.45	8.19	29.92	90.37	28.37	37.16	34.03	64.79	3.09	44.53	91.56	52.52	27.06	5.03	88.77	7.38	47.12	18.57	5.66
104.92	102.34	244.65	8.84	28.89	97.54	41.83	106.68	6.45	224.59	10.32	36.72	6.05	2.87	55.87	42.51	160.73	14.56	25.16	76.09	26.45	144.88	142.48	222.31	11.11	29.92	98.35	64.09
30.16	28.77	61.08	2.83	43.52	95.39	47.11	61.36	39.76	147.17	8.83	41.75	64.79	27.02	152.03	149.09	257.7	11.27	39.89	98.07	57.86	63.5	37.41	155.7	8.19	44.88	58.91	24.03
64.24	52.4	103.32	3.59	44.56	81.57	50.71	72.15	69.43	234.9	8.04	32.77	96.23	29.56	38.43	18.11	78.44	6.34	41.96	47.13	23.09	20.63	10.58	82.84	7.96	34.72	51.32	12.78
70.58	65.99	116.35	5.45	46.92	93.5	56.72	60.71	54.71	111.01	22.21	44.17	90.12	49.28	55.35	46.38	182.89	9.26	21.76	83.79	25.36	59.13	33.54	121.58	8.28	44.2	56.73	27.59
83.22	76.98	149.45	10.98	21.08	92.5	51.51	71.41	31.42	136.87	9.27	30.27	43.99	22.95	109.48	105.36	176.6	14.13	37.14	96.23	59.66	132.55	129.7	212.69	9.57	44.02	97.85	60.98
34.72	12.3	76.04	7.94	56.44	35.42	16.17	34	7.99	150.43	11.87	198.55	23.5	5.31	28.71	17.42	98.98	7.98	40.58	60.68	17.6	43.61	9.68	90.55	7.29	40.6	22.19	10.69
66.05	29.45	217.43	21.52	51.68	44.58	13.54	56.53	40.85	118.1	15.81	80.24	72.27	34.59	14.3	12.45	62.97	3.11	44.88	87.1	19.78	47.46	18.92	164.77	19.37	62.95	39.86	11.48
87.21	81.23	134.15	8.79	38.3	93.14	60.55	91.82	86.64	259.38	16.23	28.3	94.36	33.4	20.63	9.07	59.86	5.19	73.75	43.98	15.16	50.53	28.28	215.29	13.33	62.56	55.96	13.13
37.35	6.57	87.49	9.12	51.72	17.59	7.51	159.74	158.05	245.15	8.16	42.64	98.94	64.47	15.71	11.41	52.29	3.51	45.23	72.62	21.82	67.97	24.74	237.31	13.19	70.72	36.4	10.43
34.96	9.41	83.61	6.57	52.36	26.91	11.25	155.29	145.47	250.22	15.39	35.9	93.68	58.14	59.51	47.03	139.81	9.29	30.6	79.03	33.64	58.68	5.12	212.66	12.01	148.56	8.73	2.41
104.76	98.43	171.04	10.71	15.67	93.96	57.55	106.1	102.04	197.73	10.62	15.64	96.17	51.61	40.07	30.07	98.97	6.55	43.52	75.04	30.38	60.22	51.02	190.86	9.72	36.45	84.72	26.73
37.5	26.23	117.33	7.67	21.76	69.94	22.35	102.47	97.26	269.43	11.29	25.64	94.92	36.1	52.52	49.91	144.96	13.35	17.68	95.02	34.43	21.44	0.91	102.68	28.15	154.42	4.24	0.89
49.43	36.66	122.41	9.51	46.92	74.17	29.95	154.72	142.42	237.37	17.98	32.64	92.05	60	51.46	47.91	95.56	8.03	37.83	93.1	50.14	27.46	17.22	69.99	5.45	41.96	62.69	24.6
76.87	71.02	122.79	4.01	50.32	92.39	57.84	39.67	14.65	91.4	5.55	59.84	36.94	16.03	43.85	32.61	125.07	9.21	50.79	74.35	26.07	49.59	10.41	100.13	21.8	148.54	20.99	10.39
76.69	61.31	114.91	3.6	52.96	79.94	53.35	43.72	18.96	109.37	13.59	45.59	43.36	17.33	60.43	49.85	119.97	7.05	33.24	82.49	41.55	98.53	97.46	234.48	9.2	39.2	98.91	41.56
120.2	117.06	201.24	10.08	24.48	97.39	58.17	70.08	45.55	263.04	25.75	57.57	65	17.32	110.25	106.08	132.77	5.57	42.94	96.22	79.89	81.17	61.53	188	10.14	22.27	75.81	32.73
87.35	84	184.2	8.77	17.87	96.17	45.6	52.4	46.1	191.88	8.88	34.39	87.99	24.03	159.75	157.19	223.91	10.51	26.27	98.4	70.2	44.47	36.12	112.93	5.43	46.63	81.22	31.98
30.41	22.3	79.64	6.8	41.27	73.32	27.99	94.33	70.05	242.14	24.82	48.02	74.26	28.93	27.54	23.91	67.55	8.17	42.16	86.8	35.39	146.32	140.89	261.5	10.23	35.9	96.29	53.88
48.91	21.36	214.39	13.43	53.58	43.66	9.96	46.69	37.15	103.31	6.42	50.9	79.57	35.96	83.56	76.57	194.51	13.25	28.56	91.64	39.37	47.84	30.98	148.59	9.46	46.24	64.74	20.85
26.51	26.03	41.08	2.48	34	98.2	63.37	117.99	113.78	180.23	9.78	24.51	96.43	63.13	84.76	81.23	120.18	6.93	33.32	95.84	67.59	117.5	111.36	178.72	6.97	50.21	94.77	62.31
75.6	72.13	195.51	11.09	23.23	95.41	36.89	80.34	76.96	196.53	10.81	24.24	95.78	39.16	87.06	82.7	249.28	9.51	30.95	94.99	33.17	128.92	124.62	233.9	9.81	40.36	96.67	53.28
63.15	54.55	164.03	11.83	23.12	86.38	33.26	63.37	55.09	187.75	11.11	16	86.93	29.34	39.44	17.73	83	6.42	33.16	44.94	21.36	52.28	43.2	155.54	10.99	14.7	82.65	27.78
27.96	25.65	54.79	4.59	23.8	91.76	46.83	62.41	55.35	125.23	7.29	36.88	88.68	44.2	83.61	76.92	138.61	12.05	32.29	92	55.49	38.73	23.29	100.47	6.52	28.53	60.14	23.18
72.95	66.12	180.74	11.54	25.05	90.63	36.58	106.83	102.59	172.45	9.39	22.44	96.03	59.49	116.26	97.1	194.52	16.08	24.24	83.52	49.92	41.33	18.35	204.68	12.63	68.68	44.39	8.96
83.26	80.65	184.7	10.07	17.1	96.86	43.66	82.94	81.2	210.45	8.87	20.94	97.9	38.59	69.97	57.34	190.68	12.3	31.28	81.95	30.07	53.14	9.77	71.5	3.44	25.95	18.38	13.66
82.56	72.93	233.15	10.32	33.7	88.33	31.28	51.76	45.88	197.05	10.32	23.39	88.63	23.28	67.62	56.47	184.6	13.07	34.39	83.5	30.59	163.24	160.88	245.51	11.56	49.52	98.56	65.53
143.1	137.65	244.12	9.89	32.33	96.19	56.39	25.3	0.14	92.14	10.78	127.33	0.54	0.15	82.93	77.86	101.5	6.36	38.08	93.88	76.71	29.38	25.23	49.15	2.62	34.91	85.87	51.32
91.92	85.39	125.6	12.04	32.16	92.89	67.99	62.35	50.1	103.52	9.26	185.78	80.35	48.39	156.46	150.96	194.84	10.91	30.95	96.48	77.48	33.5	15.01	79.96	8.62	48.28	44.82	18.78
166.6	164.48	289.64	11.42	39.44	98.73	56.79	142.73	135.44	246.28	10.79	33.01	94.9	55	57.63	15.95	139.59	10.27	64.6	27.67	11.42	165.42	163.51	268.53	11.26	41.05	98.84	60.89
23.62	5.17	63.27	16.18	175.39	21.87	8.17	40.31	19.18	117.76	18.15	41.96	47.57	16.28	161.39	156.33	260.27	8.74	45.23	96.87	60.07	85.67	49.57	147.43	4.84	49.4	57.86	33.62
33.2	19.92	91.34	9.1	45.23	60	21.81	79.38	5.51	185.15	22.04	65.35	6.94	2.98	108.26	106.01	204.76	10.19	26.52	97.93	51.77	159.34	154.21	257.43	8.63	40.58	96.78	59.9
35.7	34.04	60.59	3.69	35.08	95.35	56.18	75.05	64.69	204.31	9.07	28.49	86.2	31.66	60.48	12.98	111.09	6.36	78.48	21.46	11.68	44.86	24.39	119.04	15.81	84.48	54.37	20.49
53.45	29.82	129.27	12.61	37.4	55.78	23.07	88.28	83.9	171.65	11.42	18.36	95.04	48.88	39.94	11.22	114.64	8.94	83.06	28.09	9.79	59.04	24.8	141.13	9.36	29.92	42	17.57
141.51	137.53	237.7	9.24	36.72	97.19	57.86	51.86	45.27	101.88	5.34	34.41	87.28	44.43	95.69	93.01	117.15	4.37	49.64	97.2	79.39	129.59	117.55	273.8	13.24	39.44	90.71	42.93
106.42	102.09	190.54	11.92	23.33	95.93	53.58	53.09	22.56	186.97	11.21	76.54	42.48	12.06	76.74	0.51	206.06	28.21	639.18	0.66	0.25	105.31	95.29	201.42	13.86	54.97	90.49	47.31
103.37	55.3	153.17	8.56	42.64	53.5	36.11	44.28	12.51	95.65	12.72	64.82	28.25	13.08	83.7	74.22	233.84	16.42	38.08	88.66	31.74	80.39	77.48	247.34	11.43	17.68	96.38	31.33
144.99	140.19	219.87	10.38	37.4	96.69	63.76	44.78	31.39	116.81	13.78	43.65	70.1	26.87	93.66	89.24	224.26	9.96	27.51	95.27	39.79	112.18	106.04	274.68	10.62	31.31	94.53	38.61
129.78	127.39	264.07	10.83	34	98.15	48.24	50.32	11.32	94.62	8.45	68.88	22.5	11.97	108.04	104.99	183.96	9.72	18.79	97.17	57.07	54.99	22.3	268.41	13.33	48.01	40.55	8.31
74.48	48.41	195.24	13.61	57.12	65	24.79	73.75	41.68	241.2	18.79	44.02	56.51	17.28	154.59	147.92	242.31	11.71	40.2	95.68	61.05	58.2	6.38	178.74	18.07	186.99	10.95	3.57
74.52	72.29	275.92	11.48	20.42	97	26.2	69.08	45.21	169.09	12.31	23.8	65.44	26.74	52.58	33.41	114.73	9.07	30.26	63.54	29.12	100.61	98.07	223.79	9.94	30.98	97.47	43.82
97.21	92.62	179.05	9.9	30.27	95.28	51.73	12.69	11.18	28.03	1.83	33.09	88.11	39.88	90.65	85.78	220.8	9.49	21.76	94.63	38.85	93.37	87.43	224.45	10.6	31.64	93.63	38.95
134.34	128.72	231.08	10.64	25.45	95.82	55.71	26.91	9.21	60.89	6.2	52.36	34.24	15.13	61.03	38.35	196.05	18.01	46.46	62.83	19.56	151.08	148.24	239.53	8.93	39.44	98.12	61.89
79.38	74.69	168.71	11.32	17.68	94.1	44.27	61.06	41.37	128.66	10.48	35.9	67.75	32.15	43.85	1.51	135.51	13.88	36.18	3.45	1.12	38.21	4.93	108.51	12.22	97.24	12.89	4.54
86.98	84.56	151.31	14.34	23.23	97.21	55.88	126.28	112.65	239.33	10.39	25.64	89.2	47.07	52.42	49.2	71.06	4.88	37.4	93.86	69.24	86.52	81.41	140.08	4.77	41.71	94.1	58.12
155.29	147.89	281.83	11.2	39.89	95.24	52.47	33.29	24.74	103.08	7.99	20.4	74.34	24.01	46.91	43.83	76.21	3.41	35.9	93.43	57.51	55.11	37.46	172.58	13.36	25.84	67.97	21.71
70.87	65.92	88.62	3	37.93	93.01	74.39	67.96	67.1	105.14	7.77	21.32	98.74	63.83	161.42	157.19	190.95	4.27	40.33	97.38	82.32	37.7	20.55	155.13	9.81	24.48	54.5	13.25
104.79	92.64	171.74	11.84	85	88.41	53.95	58.03	54.69	213.78	12.55	17	94.23	25.58	82.53	81.29	104.85	3.54	40.12	98.5	77.53	28.49	11.69	85.12	6.74	63.28	41.03	13.73
157.66	149.28	266.6	8.06	44.71	94.69	56	61.2	55.76	126.32	7.52	47.46	91.11	44.14	23.39	7.89	80.73	9.45	38.52	33.71	9.77	67.81	33.87	202.51	17.65	62.05	49.95	16.72
149.3	148.54	187.49	7.71	37.83	99.49	79.23	52.83	7.92	85.15	6.19	44.53	14.99	9.3	98.29	94.81	180	8.73	22.31	96.46	52.67	84.76	73.1	255.49	15.14	32.33	86.25	28.61
31.06	13.43	73.84	4.98	32.64	43.24	18.19	48.47	44.97	83.24	4.03	37.14	92.79	54.03	163.63	156.73	187.87	7.84	40.12	95.78	83.42	58.53	31.17	213.49	11.24	47.17	53.26	14.6
150.16	140.47	305.22	9.77	38.52	93.55	46.02	40.4	21.67	98.41	5.95	41.05	53.64	22.02	159.24	153.19	243.32	11.03	29.92	96.2	62.96	42.53	11.29	166.33	10.88	235.08	26.55	6.79
89.65	74.76	124.06	7.73	27.2	83.39	60.26	65.12	60.54	188.74	9.75	15.84	92.98	32.08	38.61	25.17	106.39	15	44.17	65.19	23.66	44.92	24.65	115.19	7.23	39.44	54.87	21.4
82.75	77.62	223.91	13.82	20.87	93.79	34.66	29.94	13.16	80.72	8.07	50.1	43.94	16.3	104.26	63.86	179.48	5.82	52.96	61.25	35.58	60.97	8.97	177.1	17.33	372.51	14.72	5.07
150.78	148.84	261.86	9.67	36.88	98.71	56.84	146.56	142.2	256.22	13.54	24.72	97.03	55.5	30.13	3.43	73.51	4.28	49.15	11.4	4.67	43.3	34.53	99.45	6.05	36.45	79.74	34.72
139.37	136.28	236.4	9.84	35.77	97.78	57.65	9.87	6.72	35.5	1.94	56.32	68.11	18.93	32.3	3.38	109.84	6.85	33.09	10.45	3.07	32.26	2.66	76.57	4.21	25.16	8.23	3.47
98.5	92.46	232.49	11.73	23.23	93.87	39.77	41.68	26.19	100.32	13.97	31.96	62.83	26.11	49.82	42.35	76.39	3.35	38.47	85.01	55.44	61.85	4.56	130.36	6.14	146.88	7.37	3.5
69.66	62.84	170.73	12.41	17	90.21	36.8	153.42	151.21	249.25	9.21	35.77	98.56	60.66	21	8.39	76.69	6.91	24.51	39.94	10.94	42.12	31.61	107.69	5.93	51.58	75.05	29.35
73.94	67.32	92.5	3.77	47.46	91.04	72.78	77.2	67.55	210.11	9.53	30.6	87.5	32.15	143.02	139.77	278.44	9.82	41.09	97.73	50.2	85.59	31.26	237.61	26.39	71.24	36.52	13.16
48.51	43.43	99.06	6.92	44.88	89.54	43.84	76.59	70.23	125.86	7.19	41.14	91.69	55.8	27.19	7.34	47.8	4.45	45.95	26.98	15.35	117.69	114.07	218.71	10.59	21.08	96.93	52.16
163.07	158.2	253.36	10.75	47.11	97.01	62.44	79.69	66.62	211.57	9.11	23.12	83.6	31.49	153.13	151.83	237.16	11.63	38.52	99.15	64.02	101.48	91.98	128.22	5.29	37.4	90.64	71.74
37.83	34.45	69.49	4.91	34.49	91.07	49.58	72.95	68.18	191.24	9.71	19.95	93.46	35.65	52.05	31.44	172.84	7.15	51.68	60.4	18.19	76.23	66.52	120.36	5.43	42.16	87.27	55.27
40.19	17.26	116.14	9.57	68.07	42.95	14.86	28.19	14.19	85.91	9.32	73.75	50.32	16.52	105.59	95.76	244.49	13.54	33.48	90.69	39.16	49.29	36	241.2	10.91	29.92	73.03	14.92
127.93	123.71	223.25	9.55	22.96	96.7	55.41	72.45	69.48	146.21	11.76	16.08	95.89	47.52	30.25	2.46	59.68	4.59	36.37	8.12	4.11	68.56	65.06	126.65	8.17	31.81	94.89	51.37
23.66	7.84	59.37	4.19	56.4	33.13	13.2	75.9	11.75	231.33	13.67	82.28	15.47	5.08	23.93	6.9	60.44	5.41	93.32	28.85	11.42	28.25	8.02	99.78	8.04	105.76	28.38	8.03
44.72	18.94	141.46	12.18	60.53	42.35	13.39	42.61	7.53	66.66	4.06	56.44	17.67	11.29	38.41	13.61	129.66	8.84	63.28	35.44	10.5	83.24	52.03	100.58	2.36	45.39	62.5	51.73
84.22	81.93	142.9	8.98	52.88	97.28	57.33	50.81	34.82	191.85	8.62	72.76	68.54	18.15	49.33	9.49	118.44	6.87	50.79	19.25	8.02	130.3	124.29	218.18	9.45	38.96	95.38	56.96
22.57	6.43	73.85	8.38	68.25	28.48	8.7	23.6	13.02	50.79	6.72	51.64	55.18	25.64	109.26	108.44	132.6	4.15	41.8	99.24	81.78	49.74	15.54	139.22	9.15	87.67	31.24	11.16
70.47	68.93	146.49	9.38	13.92	97.81	47.06	93.66	90.9	222.11	9.99	21.76	97.06	40.93	116.28	115.77	232.26	9.34	38.01	99.57	49.84	28.72	8.74	75.18	6.42	35.36	30.42	11.62
130.14	128.95	263.31	8.51	42.44	99.08	48.97	117.25	107.14	256.47	11.05	27.88	91.38	41.77	104.08	101.45	206.22	30.78	28.89	97.48	49.2	30.9	9.39	133.1	6.54	61.01	30.4	7.06
130.33	127.71	218.56	16.8	25.41	97.99	58.43	93.54	90.08	197.84	8.75	23.8	96.3	45.53	76.42	67.52	225.29	10.9	38.27	88.36	29.97	49.84	41.49	118.66	7.02	34.55	83.25	34.96
51.63	45.52	72.64	2.51	44.19	88.17	62.67	20.95	14.28	64.83	4.53	25.65	68.17	22.03	52.98	18.66	119.14	11.49	42.16	35.23	15.67	34.34	8.41	174.3	7.91	57.29	24.48	4.82
51.26	42.61	118.26	7.29	16.32	83.13	36.03	105.3	97.2	215.79	7.15	20.42	92.31	45.05	127.8	123.06	225.51	11.78	26.82	96.29	54.57	37.1	10.63	99.28	6.45	35.76	28.65	10.71
177.3	159.55	330.7	20.25	38.01	89.99	48.25	49.14	11.52	117.47	9.3	60.53	23.44	9.81	55.37	53.77	100.2	6.22	38.76	97.11	53.67	60.52	48.43	103.83	6.11	40.8	80.03	46.64
47.79	34.06	103.64	8.21	54.54	71.28	32.87	57.69	0.5	152.46	26.38	226.53	0.87	0.33	145.72	144.4	216.32	10.16	33.01	99.09	66.75	15.29	10.11	44.09	2.87	48.71	66.12	22.94
138.6	135.6	224.96	10.19	35	97.84	60.28	29.12	6.72	73.54	9.7	56.4	23.08	9.14	45.6	37.34	208.3	10.9	22.62	81.89	17.93	84.56	77.37	274.85	21.94	25.16	91.5	28.15
119.89	117.73	220.92	12.95	31.28	98.2	53.29	117.54	59.72	214.28	9.8	41.89	50.81	27.87	79.87	77.76	191.75	11.19	14.96	97.35	40.55	41.66	11.96	152.4	30.11	201.27	28.71	7.85
66.86	61.13	215.75	14.8	25.16	91.44	28.33	168.87	163.84	251.64	10.63	36.04	97.02	65.11	45.76	16.92	74.56	6.33	46.24	36.97	22.69	48.78	33.6	215.8	9.84	35.2	68.88	15.57
117.2	113.4	272.91	10.12	26.59	96.75	41.55	73.64	34.78	257.93	11.75	51.68	47.22	13.48	152.61	150.74	195.04	12.35	25.34	98.78	77.29	121.3	108.38	252.04	21.67	36.45	89.35	43
61.69	49.7	222.32	11.97	41.27	80.56	22.35	68.36	65.52	221.36	11.75	22.8	95.85	29.6	151.27	150.42	228.38	10.31	32.64	99.44	65.86	63.89	25.8	257.21	12.05	67.09	40.38	10.03
64.38	55.17	219.19	10.59	30.95	85.7	25.17	147.62	130.56	253.87	9.63	29.38	88.44	51.43	44.44	26.65	111.56	8.47	29.92	59.97	23.89	86.79	80.98	154.29	7.14	39.89	93.3	52.49
24.72	11.13	94.42	7.1	59.84	45.03	11.79	40.89	33.2	170.95	9.88	16.32	81.19	19.42	74.32	64.23	193.92	12.29	17.81	86.43	33.12	40.92	18.75	117.21	10.45	64.01	45.81	15.99
126.34	123.13	254.33	9.07	36.72	97.46	48.41	53.23	7.75	145.92	27.56	338.78	14.56	5.31	125.96	124.45	157.88	9.06	29.22	98.8	78.82	25.3	23.05	60.98	3.6	35.36	91.12	37.8
138.9	137.68	239.99	11.84	34	99.13	57.37	60.34	12.6	105.15	4.72	52.45	20.89	11.99	88.96	73.93	145.47	15.22	48.83	83.11	50.82	52.72	27.69	138.81	8.59	43.52	52.52	19.95
41.32	24.17	166.97	11.04	51.49	58.49	14.47	45.61	23.98	163.34	10.02	57.62	52.57	14.68	29.88	12.35	85.49	7.7	80.44	41.33	14.45	13.77	10.66	33.41	4.21	78.88	77.43	31.91
120.03	115.77	329.17	12.17	29.92	96.45	35.17	123.09	117.15	251.98	13.66	28.95	95.17	46.49	153.12	147.64	232.26	11.56	25.05	96.42	63.57	11.5	6.2	32.17	3.04	34.57	53.92	19.28
46.35	30.57	104.72	7.3	50.9	65.94	29.19	63.06	29.34	220.25	13.26	49.4	46.53	13.32	62.87	15.07	114.87	21.81	136.06	23.97	13.12	30.75	15.74	95.82	8.4	48.15	51.21	16.43
59.53	49.66	242.5	10.55	36.72	83.44	20.48	53.66	30.77	168.75	8.78	32.77	57.35	18.24	45.16	13.69	157.12	12.21	91.48	30.31	8.71	68.07	6.83	146.94	19.29	46.92	10.03	4.65
45.33	20.71	90.81	6.2	16.55	45.7	22.81	40.95	11.97	141.79	22.02	179.51	29.23	8.44	83.07	75.43	85.69	1.95	36.74	90.8	88.03	8.15	4.95	24.9	1.71	24.35	60.72	19.87
65.48	64.37	85.95	4.31	15.51	98.32	74.89	43.9	19.45	139.96	10.83	23.8	44.31	13.9	53.62	23.29	76.93	15.71	599.53	43.44	30.27	13.44	8.53	44.16	4.41	34.61	63.48	19.33
114.04	109.4	247.2	12.46	29.92	95.94	44.26	32.5	17.97	80.85	6.08	46.08	55.28	22.22	25.72	10.25	80.25	7.8	61.98	39.86	12.77	105.56	102.89	219.43	8.97	30.98	97.47	46.89
125.65	114.68	236.36	18.87	34.49	91.27	48.52	45.01	9.06	87.16	5.87	76.03	20.13	10.4	33.41	3.62	67.22	19.36	98.11	10.84	5.39	45.31	9.76	123.09	8.8	96.56	21.55	7.93
93.53	82.42	217.14	7.73	52.88	88.12	37.96	36.68	9.19	85.42	7.55	66.64	25.06	10.76	74.82	67.75	138.21	5.08	36.04	90.55	49.02	10.03	7.32	36.03	2.34	32.64	72.96	20.32
24.03	2.98	72.67	19.48	59.84	12.4	4.1	90.56	85.31	232.42	10.63	18.36	94.2	36.7	78.97	71.88	242.27	9.2	32.33	91.02	29.67	80.13	74.7	191.34	10.63	21.12	93.22	39.04
54.49	50.4	222.4	11.26	17.39	92.5	22.66	25.04	8.09	88.77	9.72	68.68	32.33	9.12	166.83	163.3	267.54	13.77	32.14	97.88	61.04	9.62	7.22	26.87	1.64	40.14	75	26.85
68.76	58.62	206.31	8.45	24.44	85.25	28.41	16.01	8.67	48.31	3.7	27.88	54.16	17.95	100.61	93.05	291.66	14.57	21.76	92.48	31.9	57.51	42.68	182.36	11.86	41.48	74.21	23.4
52	36.93	132.77	9.02	27.88	71.01	27.81	51.84	41.55	101.15	11.05	30.95	80.15	41.08	57.19	34.12	200.8	13.75	39.89	59.66	16.99	99.43	3.58	149.17	6.35	76.16	3.6	2.4
112.87	110.12	216.78	10.57	43.45	97.56	50.8	25.95	13.38	60.05	11.54	92.61	51.57	22.29	50.82	19.98	149.52	8.76	50.32	39.32	13.37	44.41	41.04	125.7	7.94	23.69	92.41	32.65
53.33	45.04	176.85	10.46	28.89	84.46	25.47	26.03	12.7	86.04	7.83	27.46	48.8	14.76	31.14	26.25	60.4	3.26	38.52	84.27	43.45	106.06	97.44	138.88	6.45	40.58	91.87	70.16
151.91	148.62	246.78	11.27	31.79	97.83	60.22	51.61	32.98	174.81	14.14	33.16	63.89	18.86	156.66	151.53	279.14	13.42	34.74	96.72	54.28	49.21	11.21	134.8	9.93	62.05	22.78	8.32
142.41	139.17	248.31	11.47	31.12	97.73	56.05	74.23	70.91	226.74	10.08	24.48	95.53	31.27	69.69	66.13	213.57	10.47	23.23	94.89	30.96	54.38	13.96	276.33	30.87	192.19	25.66	5.05
151.89	145.88	243.52	9.78	36.45	96.04	59.91	105.12	97.14	252.82	11.8	20.4	92.41	38.42	128.47	125.04	243.53	10.16	29.58	97.32	51.34	82.87	67.28	258.86	13.34	30.77	81.19	25.99
82.46	44.8	112.92	2.69	48.96	54.33	39.68	97.94	94.1	211.25	10.67	29.22	96.08	44.55	66.47	63.04	89.66	3.61	39.2	94.84	70.31	32.48	16.14	93.34	8.43	35.36	49.69	17.29
65.72	55.91	193.68	9.67	33.32	85.07	28.87	48.18	47.56	79.83	2.7	45.95	98.7	59.57	86.99	80.82	114.84	4.54	32.33	92.91	70.38	24.01	14.43	94.64	6.65	37.93	60.1	15.25
96.33	93.42	205.19	11.59	17.68	96.97	45.53	67.15	58.36	193.97	9.04	21.82	86.91	30.09	90.27	83.19	329.2	13.13	29.57	92.15	25.27	60.8	38.71	184.94	10.26	40.12	63.67	20.93
132.95	127.45	238.37	8.15	36.72	95.86	53.47	31.05	14.69	151.01	12.29	36.45	47.33	9.73	85.36	68.83	272.32	13.86	33.32	80.64	25.28	59.05	32.08	147.79	17.28	25.5	54.33	21.71
134.51	131.37	264.61	9.39	33.66	97.66	49.65	48.35	17.53	104.56	11.03	44.2	36.26	16.77	53.92	50.72	133.89	11.84	45.64	94.07	37.88	42.16	7.77	78.12	5.23	87.72	18.42	9.94
135.7	133.33	239.52	9.81	35.36	98.26	55.66	138.48	132.34	240.14	11.84	30.95	95.57	55.11	56.45	41.49	107.63	5.65	34.79	73.5	38.55	57.37	38.15	192.58	9.59	38.08	66.5	19.81
158.2	155.9	218.06	9.59	35.36	98.55	71.49	42.23	19.38	129.16	11.68	41.59	45.89	15	22.28	11.63	73.19	7.02	33.32	52.22	15.9	19.5	10.24	66.7	4	59.14	52.5	15.35
80.26	76.32	160.18	10.49	19.95	95.08	47.64	59.11	42.81	207.48	10.61	44.71	72.43	20.64	32.35	7.48	71.85	7.15	51.68	23.12	10.41	64.94	51.49	222.26	12.17	39.2	79.29	23.16
164.5	162.65	274.03	19.01	39.27	98.87	59.35	92.37	14.81	247.3	24.64	223.04	16.04	5.99	153.97	137.56	281.83	11.26	38.76	89.34	48.81	17.31	7.13	62.14	10.2	71.95	41.19	11.47
131.09	129.48	172.38	7.55	44.02	98.77	75.11	132.03	116.64	259.16	18.6	29.57	88.34	45.01	31.57	13.42	94.83	6.99	60.54	42.49	14.15	89.4	84.74	226.02	11.83	21.08	94.79	37.49
64.49	62.3	176.02	9.17	19.7	96.61	35.4	126.87	121.97	226.1	11.39	28.16	96.13	53.95	74.67	71.26	220.95	10.51	19.72	95.43	32.25	59.59	31.13	155.48	9.47	36.45	52.23	20.02
108.19	105.42	207.84	9.71	20.98	97.43	50.72	27.76	3.58	124.06	6.83	165.04	12.91	2.89	105.26	100.3	237.7	10.55	40.12	95.29	42.19	81.71	65.66	264.32	13.22	33.01	80.36	24.84
179.8	177.73	290.05	11.81	48.11	98.85	61.28	78.77	71.17	228.28	10.02	27.2	90.35	31.18	103.46	98.72	214.98	10.33	34.39	95.42	45.92	129.23	125.36	181.7	7.95	35.08	97	68.99
83.99	81.21	191.21	10.76	21.08	96.7	42.47	92.41	85.3	232.65	10.23	20.63	92.3	36.66	21.2	10.29	55.55	4.1	48.83	48.56	18.53	163.6	161.33	256.21	9.17	42.84	98.61	62.97
96.56	65.86	189.56	5.99	47.31	68.2	34.74	79.82	72.26	196.42	11.73	17	90.53	36.79	43.28	2.73	128.53	22.91	88.73	6.32	2.13	69.72	0.54	251.74	29.7	141.11	0.77	0.21
144.31	141.23	185.12	8.2	24.76	97.86	76.29	100.13	95.55	228.32	12.78	31.34	95.42	41.85	52.36	23.57	114.5	14.06	51.96	45.02	20.59	36.02	33.02	87.33	5.16	40.83	91.67	37.81
147.87	143.53	262.29	9.79	32.01	97.07	54.72	18.03	7.59	51.74	4.26	53.65	42.09	14.67	74.03	71.28	270.84	10.84	21.02	96.29	26.32	19.14	16.64	51.19	3.12	30.26	86.91	32.5
65.93	43.08	159.68	19.22	40.12	65.34	26.98	17.24	6.73	51.23	5.62	55.02	39.05	13.14	63.41	58.02	114.38	6.42	37.14	91.5	50.73	19.31	2.53	71.62	16.62	159.32	13.11	3.53
75.15	70.91	207.78	11.6	23.12	94.36	34.13	64.09	41.54	194.05	9.93	43.33	64.81	21.41	36.67	19.26	143.21	9.01	59.16	52.53	13.45	49.87	38.42	122.3	7.47	39.66	77.05	31.42
82.17	70.25	210.14	9.9	47.46	85.5	33.43	46.52	42.56	103.97	5.42	44.71	91.49	40.94	86.98	24.44	178.24	11.73	52.88	28.1	13.71	74.25	52.83	215.37	10.21	48.15	71.15	24.53
146.95	132.29	208.26	9.51	29.22	90.02	63.52	117.52	105.33	233.96	19.61	21.82	89.63	45.02	52.39	32.74	207.02	11.36	64.71	62.5	15.81	17.86	12.59	42.68	14.2	379.43	70.46	29.49
30.22	14.69	54.64	3.21	49.64	48.62	26.88	124.55	118.91	241.19	9.97	28.89	95.47	49.3	134.67	129.39	274.6	9.73	30.95	96.08	47.12	47.75	0.42	141.08	29.36	103.17	0.88	0.3
95.03	89.8	212.43	10.14	23.66	94.5	42.28	130.68	117.2	225.4	9.21	29.56	89.68	52	138.92	131.62	293.94	11.71	34	94.75	44.78	55.11	49.05	117.4	8.82	41.89	89	41.78
40.87	11.48	101.92	8.57	60.52	28.1	11.27	74.85	62.78	142.52	7.06	42.16	83.87	44.05	83.88	74.74	280.68	8.43	45.56	89.11	26.63	54.92	37.85	125.07	14.98	32.7	68.92	30.26
86.22	84.43	145.83	13.46	19.48	97.92	57.9	75.13	68.06	225.59	9.33	29.92	90.59	30.17	25.69	3.3	80.89	3.36	68.51	12.84	4.08	41.65	27.39	102.82	9.85	36.18	65.76	26.64
58.89	40.03	162.53	9.42	39.66	67.98	24.63	45.73	10.2	101	6.57	51.13	22.31	10.1	48.46	18.05	196.75	10.46	68	37.25	9.18	27.2	18.23	83.38	4.76	38.01	67	21.86
51.42	39.95	214.15	11.83	44.53	77.69	18.65	40.78	19.52	100.37	9.78	13.76	47.87	19.45	74.73	66.65	142.28	19.82	36.04	89.2	46.85	21.07	11.52	72.18	15.09	44.02	54.69	15.96
190.73	185.97	302.78	12.74	38.52	97.5	61.42	39.48	14.06	104.88	7.8	43.88	35.63	13.41	144.65	122.56	263.74	11.04	33.7	84.72	46.47	47.43	40.3	131.95	14.92	30.95	84.96	30.54
171.06	169.81	222.25	9.49	29.41	99.27	76.4	121.62	115.92	234.23	10.59	35.2	95.31	49.49	161.76	143.04	270.97	9.98	37.57	88.42	52.79	60.39	31.39	218.71	14.02	42.16	51.97	14.35
95.23	88.01	235.31	11.01	27.14	92.42	37.4	122.16	116.9	268.41	9.69	27.83	95.7	43.55	27.73	7.18	79.22	5.53	65.82	25.89	9.06	62.82	23.59	166.17	10.4	52.96	37.55	14.2
94.62	84.85	223.8	8.47	22.27	89.67	37.91	108.83	57.62	217.55	20.21	39.66	52.94	26.48	39.29	24.05	77.48	5.85	35.74	61.21	31.04	95.85	88.85	226.29	10.87	17.68	92.7	39.26
37.94	32.59	96.28	8.24	24.48	85.91	33.85	46.47	11.76	170.9	13.51	22.35	25.31	6.88	81.25	70.87	220.03	32.27	13.07	87.23	32.21	47.25	31.46	114.8	7.29	59.84	66.58	27.4
62.73	55.43	187.59	9.82	23.23	88.35	29.55	72.87	38.98	209.82	11.91	43.83	53.49	18.58	75.28	7.56	147.73	14.96	40.8	10.04	5.12	66.76	63.19	150.72	11.68	33.48	94.65	41.93
31.3	6.56	72.22	6.22	63.97	20.98	9.09	106.1	44.9	208.08	14.84	42.64	42.31	21.58	77.2	71.88	230.63	10.33	22.08	93.1	31.17	68.72	65.03	113.73	4.88	49.99	94.63	57.18
40.29	14.37	116.14	12.86	57.12	35.67	12.37	75.72	0.41	240.39	20.24	195.83	0.54	0.17	19.06	10.84	73.61	6.49	40.37	56.87	14.72	38.36	8.36	67.75	4.96	40.37	21.8	12.34
78.03	53.06	219.82	15.51	25.16	67.99	24.14	35.66	20.9	141.72	10.55	46.08	58.61	14.75	57.82	32.22	118.57	10.38	32.85	55.73	27.17	80.69	53.59	236.76	11.72	32.77	66.41	22.63
45.06	24.15	164.95	9.2	46.92	53.59	14.64	76.27	69.15	115.42	5.72	46.08	90.67	59.92	49.69	47.74	114.89	4.48	36.7	96.08	41.55	76.8	62.27	280.54	12.8	38.96	81.09	22.2
134.6	132.93	215.93	10.07	25.74	98.76	61.56	89.35	86.98	167.69	9.58	17.68	97.34	51.87	48.55	30.96	166.68	15.08	27.69	63.77	18.58	104.35	27.36	131.11	10.57	8.84	26.22	20.87
39.5	30	117.29	6.3	38.96	75.93	25.57	55.85	5.32	126.09	24.16	162.12	9.53	4.22	56.85	50.11	142.16	9.43	27.2	88.13	35.25	143.57	129.35	269.74	9.3	29.17	90.09	47.95
135.04	131.29	186.08	9.29	37.14	97.22	70.55	102.5	93.25	202.94	8.59	24.35	90.98	45.95	107.08	104.24	234.1	13.26	41.27	97.34	44.53	158.8	157.64	178.34	8.51	28.16	99.27	88.39
44.2	31.78	168.09	10.07	22.96	71.89	18.91	59.87	52.5	186.25	11.99	20.67	87.68	28.19	70.2	66.97	119.49	4.23	45.56	95.39	56.04	74.14	56.9	199.84	19.13	29.92	76.74	28.47
159.1	153.92	220.79	8.21	34.39	96.75	69.71	77.96	65.43	233.05	9.07	38.08	83.92	28.08	96.72	93.69	237.6	12.54	21.32	96.87	39.43	18.32	10.07	43.23	4.72	99.73	54.98	23.29
32.16	11.62	86.91	6.67	46.08	36.14	13.37	36.44	11.74	139.63	9.04	70.04	32.22	8.41	168.42	166.75	320.04	13.48	34.71	99.01	52.1	71.32	57.62	252.01	15.64	23.12	80.79	22.86
35.5	7.22	90.22	18.3	61.23	20.34	8	59.74	8.91	171.8	20.87	105.6	14.92	5.19	74	61.71	241.98	10.5	45.39	83.39	25.5	120.49	113.54	180.62	9.1	21.76	94.24	62.86
51.54	40.16	167.03	8.07	32.45	77.91	24.04	138.62	128.66	215.51	8.32	38.01	92.82	59.7	58.19	46.28	222.8	11.71	28.53	79.53	20.77	42.39	14.84	80.06	7.08	51.29	35.01	18.54
64.42	52.91	138.97	10.84	19.72	82.13	38.08	26.48	11.19	76.14	4	59.15	42.25	14.69	20.01	7.61	70.24	9.53	72.22	38.05	10.84	41.48	22.66	113.43	7.77	61.93	54.63	19.98
75.38	71.37	211.47	9.16	22.44	94.69	33.75	45.39	22.02	86.7	15.19	127.93	48.51	25.39	54.46	42.13	136.7	14.67	34.71	77.37	30.82	46.05	23.64	191.15	9.76	50.69	51.34	12.37
38.52	18.73	141.91	8.65	41.53	48.63	13.2	35.98	26.09	90.21	7.04	35.77	72.52	28.93	26.82	18.34	79.69	8.95	47.6	68.38	23.01	35.54	14.02	138.91	7.32	56.36	39.46	10.09
29.52	22.02	95.7	7.97	30.95	74.62	23.02	27.65	9.3	106.87	13.56	69.56	33.64	8.7	169.17	163.9	225.54	12.09	31.91	96.88	72.67	54.86	46.8	113.27	8.87	31.28	85.31	41.32
44.89	8.19	81.78	6.39	76.35	18.23	10.01	37.58	30.63	74.56	6.07	32.37	81.5	41.08	60.71	52.66	232.05	8.53	22.44	86.75	22.69	134.94	131.1	245.29	11.18	36.45	97.16	53.45
31.91	18.54	102.97	6.53	23.8	58.09	18	71.66	69.59	162.88	11.52	13.6	97.12	42.72	47.73	44.42	108.56	4.01	57.06	93.06	40.92	73.27	71.23	128.99	5.98	15.49	97.21	55.22
56.54	26.69	166.7	18.73	43.14	47.2	16.01	119.51	113.32	217.85	8.31	30.61	94.82	52.02	58.8	50.78	143.23	6.94	46.92	86.36	35.45	40.33	23.11	93.16	6.6	49.52	57.29	24.8
42.25	6.72	106.13	8.29	77.03	15.91	6.34	139.08	136.5	207.07	9.77	35.08	98.14	65.92	121.67	117.72	267.2	9.24	27.46	96.75	44.06	29.69	2.51	90.16	15.28	102.28	8.46	2.79
63.35	43.86	163.34	11.01	23.35	69.23	26.85	28.62	8.08	105.87	9.65	61.9	28.23	7.63	148.53	140.9	268.26	9.55	33.24	94.87	52.53	35.44	12.27	76.09	5.87	42.16	34.64	16.13
56.68	50.54	207.69	10.05	14.44	89.16	24.33	58.29	48.65	224.9	11.2	32.64	83.46	21.63	62.99	45.59	244.6	12.83	52.88	72.37	18.64	62.02	34.87	220.82	14.17	65.36	56.23	15.79
63.52	55.39	117.56	6.04	36.04	87.2	47.12	11.21	9.46	29.45	1.82	40.36	84.34	32.11	88.51	84.34	247.43	9.65	25.05	95.29	34.09	104.36	98.09	304.52	9.95	23.94	93.99	32.21
89.2	86.33	198.73	9.56	21.08	96.78	43.44	137.58	133.62	241.05	9.89	36.88	97.12	55.43	102.45	92.18	266.3	9.92	27.07	89.98	34.61	59.49	56.8	136.23	9.37	14.78	95.49	41.7
84.19	76.14	241.04	11.3	23.8	90.44	31.59	70.46	40.44	149.27	9.45	28.56	57.39	27.09	65.84	50	190.94	10.37	23.27	75.94	26.19	60.5	39.38	206.83	13.1	31.81	65.09	19.04
43.8	9.31	80.44	5.12	53.04	21.26	11.58	94.49	90.47	166.76	9.74	15.64	95.75	54.25	89.14	82.66	227.77	12.52	17	92.73	36.29	50.4	35.13	202.64	9.27	46.92	69.7	17.33
56.16	30.07	189.1	9.96	32.64	53.54	15.9	65.44	45.37	208.48	11.17	38.68	69.34	21.76	147.41	138.05	297.05	10.25	35.77	93.65	46.47	49.93	40.83	164.53	10.17	16.21	81.77	24.81
44.65	42.49	129.72	9.77	15.13	95.17	32.75	27.74	1.46	72.16	12.47	106.61	5.26	2.02	45.12	33.67	100.36	4.73	53.58	74.62	33.55	47.33	8.52	108.69	7.56	65.4	18	7.84
97.26	92.8	209.35	12.37	14.28	95.42	44.33	92.35	86.23	175.81	10.82	14.28	93.37	49.05	170.4	168.87	263.1	10.68	41.75	99.11	64.18	113.62	105.46	203.59	18.2	22.08	92.82	51.8
63.77	51.79	200.3	9.41	29.24	81.22	25.86	57.8	23.38	92.47	8.41	32.97	40.45	25.29	37.43	16.91	99.92	3.61	59.14	45.19	16.93	109.36	107.17	157.23	9.82	24.35	98	68.16
50.07	26.07	161.11	11.22	50.1	52.06	16.18	49.97	22.49	118.73	15.02	83.06	45.01	18.94	99.41	91.2	233.86	10.85	23.12	91.74	39	135.44	123.17	241.32	10.62	32.38	90.94	51.04
65.04	46.78	179.8	8.97	24.48	71.93	26.02	74.05	57.93	269.59	15	36.61	78.23	21.49	36.33	6.79	111.14	8.23	58.43	18.68	6.11	147.71	144.82	213.86	11.18	34.19	98.04	67.72
71.83	55.54	174.13	8.75	22.01	77.32	31.9	100.32	93.95	144.31	8.27	31.68	93.65	65.1	42.05	23.76	120.23	7.19	39.2	56.5	19.76	56.78	6.52	85.83	7.63	51.17	11.48	7.59
39.97	17.76	84.77	7.37	42.16	44.45	20.96	66.4	36.34	200.77	12.86	38.65	54.72	18.1	151.37	148.26	262.28	10.58	32.64	97.95	56.53	52.5	33.38	214.93	11.24	62.62	63.59	15.53
83.07	76.61	239.41	12.05	31.68	92.21	32	109.57	80.56	165.41	8.43	29.92	73.52	48.7	98.17	81.92	254.93	10.45	37.72	83.45	32.14	22.09	10.29	89.85	6.4	46.86	46.58	11.45
148.41	146.37	235.16	10.36	36.72	98.63	62.24	165.18	161.33	274.45	11.82	36.61	97.67	58.78	31.54	0.72	160.32	15.13	259.75	2.27	0.45	62.02	40.36	108.03	16.34	35.36	65.07	37.36
79.29	73.55	126.26	6.63	43.52	92.76	58.25	39.74	20.19	110.84	9.29	44.02	50.8	18.21	123.97	112.73	259.53	14.32	26.14	90.93	43.44	49.96	15.4	173.53	10.68	86.36	30.83	8.88
45.46	24.51	111.98	10.39	28.16	53.92	21.89	60.45	36.71	225.15	10.21	64.65	60.74	16.31	25.93	8.51	110.66	30.39	47.87	32.83	7.69	67.75	35.17	171.28	12.05	38.01	51.91	20.53
81.4	78.43	230.24	9.53	21.12	96.36	34.07	75.57	46.53	241.25	12.36	36.18	61.57	19.29	46.37	23.16	109.24	4.65	66.74	49.94	21.2	73.76	59.9	235.92	12.39	50.79	81.2	25.39
65.08	30.48	190.56	9.9	44.02	46.84	16	60.38	19.98	154.11	20.44	60.52	33.08	12.96	74.55	65.54	118.43	10.02	39.2	87.92	55.34	52.57	17.15	206.84	12.12	96.56	32.63	8.29
102.75	99.34	219.26	9.89	23.8	96.68	45.31	65.51	42.06	229.06	10.49	52.47	64.19	18.36	78.44	71.7	224.32	9.8	25.84	91.41	31.96	61.28	23.63	147.5	9.19	35.33	38.56	16.02
79.21	51.64	241.76	10.3	46.08	65.2	21.36	36.62	15.31	138.71	12	87.35	41.81	11.04	68.94	16.79	97.23	4.1	43.14	24.35	17.27	58.04	37.46	222.03	10.44	50.9	64.54	16.87
40.1	12.58	138.18	11.58	96.45	31.37	9.1	95.69	92.54	198.7	10.1	19.04	96.7	46.57	42.92	15.64	96.09	7	45.92	36.44	16.28	26.39	9.7	72.05	5.04	34.49	36.76	13.47
72.54	66.5	220.08	11.98	18.52	91.67	30.22	29.75	24.31	99.06	7.18	17	81.74	24.55	39.65	27.02	155.22	8.57	21.76	68.16	17.41	121.35	116.99	225.35	8.99	35.49	96.4	51.91
134.32	124.49	240.7	10.35	33.75	92.68	51.72	58.77	17.69	163.93	20.25	69.58	30.09	10.79	61.42	47.65	218.64	8.92	33.32	77.59	21.8	128.23	120.9	276.74	8.63	30.26	94.28	43.69
91.28	88.72	210.81	9.45	25.16	97.19	42.08	51.91	26.05	164.44	10.38	41.27	50.19	15.84	66.97	42.07	197.98	10.63	23.79	62.83	21.25	69.06	66.99	162.95	8.5	17.19	97	41.11
49.99	41.13	84.8	5.41	30.26	82.28	48.5	64.24	62.43	164.05	8.21	15.64	97.18	38.05	125.36	121.31	242.15	9.97	24.1	96.77	50.1	108.84	104.49	219.61	6.65	27.54	96	47.58
21.38	5.01	47.41	11.7	184.5	23.45	10.58	54.13	27.34	116.85	8.67	37.28	50.51	23.4	68.42	59.81	123.12	9.25	19.48	87.42	48.58	61.46	58.96	171.59	10.69	16.32	95.94	34.36
135.64	130.51	228.03	9.67	32.01	96.22	57.23	56.09	17.25	157.54	13.03	35.08	30.75	10.95	140.69	136.5	233.4	9.23	38.27	97.02	58.48	42.45	19.89	125.07	10	41.48	46.87	15.91
70.23	54.84	150.26	8.32	42.64	78.09	36.5	47.83	21.55	178.75	9.86	57.06	45.05	12.05	50.05	19.17	132.97	8.49	42.64	38.31	14.42	118.16	113.36	238.75	8.56	31.64	95.94	47.48
24.14	11.28	65.45	5.37	76.35	46.72	17.23	45.7	16.9	107.77	10.48	40.8	36.97	15.68	140.56	130.88	261.13	10.33	33.4	93.11	50.12	86.11	81.76	200.71	9.57	21.12	94.95	40.74
88.7	76.38	256.82	11.86	33.82	86.11	29.74	117.28	109.46	241.6	8.82	31.3	93.34	45.31	31.51	8.37	77	5.52	53.5	26.57	10.87	43.37	8.09	101.71	5.92	47.46	18.66	7.96
82.49	70.44	250	7.93	36.08	85.4	28.18	35.59	11.51	74.1	5.33	38.96	32.34	15.53	145.95	141.54	265.61	9.03	39.2	96.97	53.29	53.61	49.54	168.11	10.53	27.83	92.4	29.47
62.59	43.91	164.1	10.61	39.89	70.16	26.76	87.86	82.44	177.35	10.61	18.79	93.82	46.48	46.27	34.53	103.32	7.61	39.2	74.62	33.42	82.65	56.23	166.15	16.33	43.43	68.03	33.84
53.07	47.12	197.87	9.84	24.35	88.8	23.81	106.73	96.85	169.79	9.09	26.51	90.74	57.04	32.64	28.35	111.42	7.01	23.66	86.86	25.45	81.84	76.7	188	10.66	20.42	93.72	40.8
49.22	45.69	192.13	9.3	16.32	92.84	23.78	112.84	108.23	184.2	10.33	21.76	95.92	58.76	54.75	33.43	156.93	9.97	28.56	61.06	21.3	144.11	139.41	261.4	10.86	31.44	96.74	53.33
61.95	52.72	240.57	8.67	32.44	85.11	21.92	39.31	6.21	99.74	9.73	53.72	15.81	6.23	81.91	80.12	165.72	9.43	21.76	97.81	48.35	32.46	15.11	96.25	7.31	61.23	46.54	15.69
34.62	24.24	113.85	5.39	38.53	70.01	21.29	45.12	29.9	123.11	9.34	27.83	66.28	24.29	77.14	76.09	164.96	8.83	21.08	98.64	46.13	29.93	5.8	103.14	7.96	63.97	19.37	5.62
53.02	37.83	140.9	9.37	25.05	71.34	26.85	42.03	25.49	120.21	11.15	24.48	60.65	21.2	114.41	113.85	175.89	8.63	25.45	99.51	64.73	52.57	45.55	215.18	11.15	16.32	86.64	21.17
51	27.29	144.39	8.89	38.72	53.51	18.9	107.9	102.3	189.12	8.87	20.87	94.81	54.09	39.68	11.73	87.94	8.39	48.28	29.56	13.34	160.67	156.98	255.76	10.74	40.8	97.7	61.38
75.38	48.82	170.05	7.3	43.05	64.76	28.71	36.23	15.73	93.19	6.51	44.88	43.43	16.88	57.33	14.49	123.92	7.07	30.95	25.27	11.69	39.62	21.78	107.11	7.36	30.98	54.97	20.33
58.14	36.12	164.23	11.83	40.12	62.13	21.99	83.9	75.56	202.05	9.41	25.84	90.06	37.4	25.34	10.48	84.57	6.09	46.14	41.35	12.39	145.43	136.08	259.27	8.37	39.44	93.57	52.49
44.93	23.07	148.07	8.56	48.15	51.33	15.58	31.18	13.57	76.37	5.45	41.05	43.51	17.76	51.43	30.65	153.59	9.97	40.58	59.59	19.95	75.18	18.66	143.04	9.91	40.58	24.82	13.04
110.16	107.58	244.1	9.64	26.52	97.66	44.07	110.41	107.01	199.99	9.9	21.32	96.92	53.51	120.51	109.22	205.04	6.97	28.2	90.63	53.27	122.75	116.7	207	10.54	28.89	95.07	56.38
78.95	69.68	151.33	12.28	27.4	88.25	46.04	73.47	69.47	146.22	10.5	17	94.57	47.51	136.05	132.17	231.17	8.84	33.32	97.14	57.17	30.67	9.29	67.12	9.06	34	30.29	13.84
46.3	16.8	142.86	11.26	53.65	36.28	11.76	37.59	12.35	83.86	5.23	58.41	32.86	14.73	62.49	37.01	173.31	10.61	42.16	59.23	21.35	39.88	20.96	109.01	6.31	53.65	52.56	19.23
71.49	53.89	136.15	12.55	137.7	75.38	39.58	62.33	35.13	247.43	12.48	74.8	56.36	14.2	114.07	107.04	177.4	8.12	20.18	93.84	60.34	58.15	31.46	221.51	11.07	57.09	54.1	14.2
150.25	146.49	274.43	10.85	35.36	97.5	53.38	19.65	10.45	61.96	5.41	42.24	53.2	16.87	55.45	38.62	183.91	11.28	38.08	69.64	21	107.92	103.42	157.25	7.1	25.27	95.82	65.76
78.04	70.89	198.1	9.12	24.76	90.84	35.78	122.53	114.01	209.18	11.35	25.16	93.05	54.5	74.81	69.66	208.5	9.93	26.44	93.12	33.41	49.12	41.38	173.58	10.81	16.19	84.23	23.84
125.67	118.39	243.78	10.17	32.38	94.21	48.57	95.97	90.16	155.98	9.11	17	93.95	57.81	50.99	31.73	112.5	6.89	46.92	62.23	28.21	89.27	85.09	155.08	7.95	32.77	95.32	54.87
37.43	11.37	125.97	9.34	77.72	30.39	9.03	39.75	15.44	90.93	6.66	48.83	38.84	16.98	81.11	73.09	225.86	10.57	39.89	90.11	32.36	47.2	0.98	129.98	29.94	300.65	2.08	0.76
125.56	106.22	238.94	14.12	27.2	84.6	44.45	22.69	9.91	89.04	5.64	50.32	43.67	11.13	33.77	15	96.39	12.58	15.64	44.4	15.56	49.26	10.14	154.62	9.71	59.15	20.59	6.56
101.75	86.69	211.87	24.7	15.49	85.2	40.92	23.2	3.4	46.33	4.03	62.69	14.65	7.34	58.5	16.94	120.4	7.72	50.81	28.96	14.07	70.05	65.96	201.21	9.49	22.08	94.17	32.78
69.76	42.48	240.44	17.8	58.32	60.9	17.67	96.71	91.16	143.04	7.08	29.92	94.26	63.73	81.26	75.52	274.33	12.16	28.2	92.93	27.53	60.93	14.03	148.76	19.2	62.56	23.03	9.43
144.16	124.17	248.49	10.15	34.39	86.14	49.97	101.22	93.74	160.7	8.78	21.76	92.61	58.33	151.12	150.48	188.11	11.37	24.73	99.58	79.99	136.31	133.1	179.98	9.4	29.92	97.65	73.96
45.85	30.11	165.87	9.19	55.61	65.66	18.15	141.79	137.88	225.88	10.59	30.61	97.24	61.04	32.47	22.13	151.38	9.94	28.56	68.14	14.62	87.24	84.71	199.9	12.02	20.4	97.11	42.38
63.98	57.53	191.51	9.61	18.36	89.91	30.04	149.92	141.95	225.75	9.98	38.01	94.68	62.88	108.27	103.35	160.23	7.66	38.27	95.45	64.5	69.85	66.33	186.16	8.56	22.01	94.96	35.63
30.77	20.48	68.28	5.78	35.08	66.58	30	143	140.65	270.36	9.57	31.96	98.36	52.02	18.05	6.28	38.06	8.19	112.11	34.82	16.51	100.88	97.15	134.77	5.19	34.68	96.3	72.08
86.31	24.62	156.47	9.25	36.04	28.52	15.73	46.38	42.1	172.52	9.56	23.8	90.78	24.41	20.48	10.03	87.6	5.82	49.68	48.96	11.45	96.89	37.2	204.81	15.23	23.12	38.4	18.17
44.15	17.78	116.38	8.54	79.78	40.28	15.28	147.29	143.25	233.53	10.46	41.75	97.26	61.34	60.93	40	236.55	11.49	61.23	65.66	16.91	121.21	108.36	192.67	9.62	23.23	89.4	56.24
41.87	10.28	132.83	8.87	88.04	24.56	7.74	26.62	11.99	82.29	8.52	58.48	45.06	14.57	18	6.81	88.41	4.48	90.11	37.85	7.71	48.02	22.4	134.34	24.83	10.32	46.64	16.67
70.72	68.05	121.37	6.15	28.92	96.23	56.07	28.93	16.87	92.98	6.3	29.24	58.33	18.15	60.08	45.11	182.41	13.75	36.18	75.08	24.73	56.28	21.64	156.49	9.87	48.01	38.46	13.83
85.76	80.81	230.57	9.18	17	94.23	35.05	99.05	94.65	151.53	8.58	16.32	95.56	62.46	92.95	86.3	163.43	7.36	21.76	92.85	52.81	36.29	29.68	138.53	10.91	17	81.78	21.43
32.56	10.89	81.64	7.8	48.15	33.45	13.34	96.47	94.52	162.85	9.06	24.64	97.98	58.04	23.34	7.22	113.49	5.34	83.11	30.92	6.36	40.53	32.59	201.67	8.75	15.54	80.41	16.16
60.59	57.82	134.09	8.07	28.56	95.43	43.12	59.04	56.37	169.16	9.19	21.12	95.47	33.32	72.97	51.71	145.27	9.67	14.96	70.87	35.6	67.35	53.77	208.16	11.08	36.45	79.84	25.83
45.28	3.3	102.27	6.77	23.37	7.28	3.22	60.5	57.68	153.27	4.96	42.64	95.35	37.64	123.67	118.54	242.42	8.04	29.92	95.85	48.9	79.28	67.52	148.92	8.62	21.08	85.17	45.34
59.32	37.25	166.62	13.15	28.56	62.8	22.36	142.44	135.64	216.06	15.35	27.05	95.22	62.78	49.34	14.6	162.76	12.07	63.97	29.58	8.97	58.71	34.95	177.63	12.9	30.95	59.52	19.68
44.85	13.08	135.21	8.67	75.66	29.17	9.68	67.77	64.17	176.54	9.41	11.56	94.69	36.35	50.9	22.43	182.89	10.83	52.88	44.06	12.26	71.07	36.41	163.37	12.57	31.96	51.23	22.28
136.06	130.47	235.68	9.49	33.01	95.89	55.36	67.39	41.55	166.5	10.35	28.89	61.65	24.95	49.55	33.64	191.71	10.88	43.65	67.9	17.55	105.84	95.42	225.99	11.64	23.8	90.15	42.22
52.65	38.6	188.71	8.84	50.9	73.32	20.46	158.24	144.18	237.17	16.19	35.36	91.11	60.79	14.83	2.49	34.83	2.69	125.24	16.79	7.15	121.53	117.23	194.29	9.42	32.72	96.46	60.34
70.92	68.8	244.24	8.9	20.4	97.01	28.17	146.47	144.28	226.65	10.24	36.62	98.5	63.66	111.64	37.97	173.38	19.06	25.16	34.01	21.9	25.42	8.04	76.85	4.72	66.72	31.64	10.47
138.1	129.52	260.15	9.76	32.06	93.78	49.78	148.41	145.68	200.98	9.76	25.84	98.16	72.49	99.59	98.56	146.45	8.12	27.83	98.96	67.3	45.8	38.77	133.51	8.23	14.28	84.64	29.04
79.76	73.25	205.92	11.21	16.32	91.84	35.57	142.63	140.7	219.3	12.11	42.84	98.65	64.16	52.58	7	96.41	8.95	28.78	13.31	7.26	20.61	15.24	54.28	3.56	39.89	73.97	28.08
67.25	40.69	180.48	12.54	22.8	60.51	22.55	83.38	81.19	214.84	10.75	22.01	97.37	37.79	106.93	87.77	228.47	16.72	31.49	82.08	38.42	141.61	112.42	251.03	19.7	36.88	79.39	44.78
55.43	48.43	134.08	7.81	21.08	87.37	36.12	127.88	123.08	237	9.22	38.08	96.24	51.93	103.14	100.42	128.26	5.97	44.7	97.36	78.29	91.01	88.57	117.25	6.38	19.08	97.31	75.54
37.36	32.86	92.78	6.62	28.53	87.94	35.42	64.98	58.22	197.9	11.89	14.96	89.6	29.42	117.24	114.21	202.44	11.95	30.95	97.42	56.41	13.73	1.03	53.32	8.29	112.2	7.49	1.93
55.61	43.22	171.85	9.12	47.31	77.72	25.15	123.74	116.68	208.83	10.75	23.12	94.29	55.87	74.35	71.64	182.31	9.42	16.32	96.35	39.29	90.29	82.1	199.29	8.07	27.14	90.93	41.2
50.72	32.09	212.85	11.84	66.37	63.26	15.07	132.17	127.65	234	10.06	33.01	96.58	54.55	46.95	30.44	158.58	8.64	64.82	64.84	19.2	54.06	36.72	201.28	10.95	54.14	67.93	18.24
41.14	15.51	116.13	9.17	56.4	37.69	13.35	145.38	130.25	257.28	14.43	33.7	89.59	50.62	114.41	110.26	220.2	10.85	25.45	96.37	50.07	129.28	123.16	196.62	9.86	30.62	95.27	62.64
47.63	29.75	128.38	11.8	20.74	62.47	23.18	64.87	51.2	173.66	8.87	15.64	78.93	29.49	61.12	48.56	188.62	10.39	26.82	79.45	25.75	125.5	123.74	215.02	12.16	36.88	98.6	57.55
45.22	19.89	130.15	9.34	48.15	43.99	15.28	119.91	112.9	227.1	8.58	25.5	94.16	49.72	74.36	59.6	188.62	15.65	30.6	80.15	31.6	137.91	131.36	225.29	10.92	33.09	95.25	58.31
62.47	36.82	109.97	15.02	233.79	58.94	33.48	78.86	75.99	133.01	12.99	19.48	96.36	57.13	113.6	110.45	162.88	8.71	24.07	97.23	67.81	141.6	128.71	263.5	22.74	35.77	90.89	48.85
87	80.94	143.32	6.95	41.48	93.04	56.47	82.48	76.58	194.81	10.93	20.67	92.85	39.31	45.92	16.2	146.26	10.67	61.21	35.28	11.08	35.84	24.29	109.92	13.42	53.58	67.78	22.1
71.11	24.31	242.92	12.99	58.15	34.18	10.01	152.1	148.42	187.03	8.86	24.35	97.58	79.35	68.9	61.03	208.95	9.33	28.2	88.57	29.21	51.08	28.78	134.27	10.6	74.25	56.35	21.44
36.38	30.75	85.26	5.17	32.7	84.51	36.06	29.39	3.42	132.58	21.32	313.27	11.65	2.58	82.4	75.4	141.79	9.56	12.26	91.51	53.18	132.83	126.22	208.25	9.71	30.62	95.03	60.61
151.39	141.81	239.93	10.47	33.01	93.68	59.11	69.61	63.67	169	7.72	21.54	91.46	37.67	57.02	33.25	200.74	8.95	42.16	58.32	16.56	110.7	105.49	289.61	8.67	32.64	95.29	36.42
155.46	153.23	229.29	8.45	40.24	98.57	66.83	98.92	92.42	166.28	15.18	19.01	93.44	55.58	157.61	150.18	185.39	10.57	28.2	95.28	81	27.44	19.79	102.59	7.95	25.84	72.11	19.29
75.21	61.74	190.37	10.69	24.93	82.09	32.43	72.59	50.34	195.39	11.4	38.96	69.35	25.76	60.92	42.41	234.6	15.84	51	69.62	18.08	65.46	61.15	215.04	9.68	17	93.42	28.44
29.5	19.04	70.69	4.38	28.89	64.56	26.94	115.85	110.82	206.05	10.48	23.35	95.65	53.78	44.93	34.07	107.13	6.47	34.39	75.83	31.8	169.32	167.75	256.16	13.9	33.4	99.07	65.49
45.05	26.97	84.26	3.14	39.06	59.88	32.01	124.29	13.56	187.97	31.43	262.05	10.91	7.21	69.57	66.5	147.61	15.59	14.96	95.58	45.05	102.03	99.28	181.35	13.85	32.64	97.3	54.74
56.26	47.09	125.93	6.54	47.6	83.7	37.4	35.2	3.76	198.51	11.44	81.85	10.69	1.89	83.53	81.04	205.22	12.49	23.12	97.02	39.49	32.6	10.41	98.29	10.38	35.08	31.92	10.59
47.02	6.4	130.96	15.38	172.03	13.61	4.89	36	25.24	126.37	10.57	34.39	70.1	19.97	53.46	40.65	162.67	18.24	65.28	76.04	24.99	138.47	134.5	251.32	12.27	36.72	97.13	53.52
68.47	64.84	118.66	5.9	30.85	94.71	54.65	146.66	146.04	201.19	9.54	19.95	99.58	72.59	64.55	60.71	141.58	10.22	16.19	94.04	42.88	123.51	120.34	224.12	9.34	36.18	97.43	53.7
80.02	77.61	117.87	6.61	28.89	96.99	65.84	62.89	58.47	208.79	8.91	18.36	92.97	28	98.12	92.54	205.45	10.5	22.01	94.31	45.04	146.89	134.67	249.19	9.75	36.72	91.68	54.04
104.17	90.28	274.81	11.42	23.12	86.66	32.85	45.12	42.86	66.24	2.07	44.2	95	64.71	95.42	91.05	198.9	9.5	25.05	95.41	45.78	92.84	82.53	172.49	10.3	15.13	88.9	47.85
50.49	34.9	105.43	8.31	35.36	69.11	33.1	34.73	6.3	84.87	6.92	46.92	18.14	7.43	23.02	11.08	63.95	6.44	40.8	48.15	17.33	39.76	21.44	99.2	8.7	48.83	53.92	21.61
46.61	20.62	162.95	15.35	50.21	44.24	12.65	36.03	34.39	97.72	7.34	19.21	95.44	35.19	24.78	10.92	75.47	7.72	48.96	44.07	14.47	64.81	61.58	190.79	9.74	24.48	95.02	32.27
142.54	119.98	258.73	10.17	30.6	84.17	46.37	118.09	115.59	170.25	9.85	25.45	97.88	67.89	106.96	101.86	193.8	9.44	23.12	95.24	52.56	114.53	111.51	207.82	8.97	20.63	97.36	53.66
55.2	53.13	112.71	7.17	29.58	96.26	47.14	58.6	55.09	190.49	9.8	26.05	94.01	28.92	121.36	115.06	247.22	9.04	31.64	94.81	46.54	61.28	37.76	80.4	2.94	41.48	61.62	46.96
158.13	135.44	256.54	13.09	29.92	85.65	52.79	84.94	73.45	235.71	11.55	23.12	86.47	31.16	141.98	138.77	238.61	7.48	38.96	97.75	58.16	153.03	139.83	188.69	8.39	32.7	91.37	74.1
51.41	44.95	80.11	4.97	37.4	87.45	56.11	102.97	42.43	221.52	21.64	21.76	41.21	19.16	150.72	144.4	242.12	8.96	33.98	95.81	59.64	162.71	121.47	234.01	11.57	31.68	74.65	51.91
34.43	14.47	74.6	8.53	57.12	42.03	19.4	157.95	155.43	239.62	10.94	38.76	98.4	64.86	70.18	68.65	187.86	10.28	23.66	97.82	36.54	72.48	67.27	178.53	10.86	17.88	92.81	37.68
79.58	58.85	222.21	10.72	27.88	73.95	26.48	51.81	45.33	103.81	10.04	32.7	87.48	43.66	143.32	142.53	194.11	11.19	34.09	99.45	73.43	85.4	63.37	111.72	5.8	25.74	74.21	56.73
79.6	72.36	217.44	7.64	29.49	90.91	33.28	49.11	29.29	158.91	11.48	26.36	59.65	18.43	78.47	62.14	138.47	22.49	33.66	79.19	44.88	127.76	125.56	231.52	11.35	31.96	98.28	54.23
85.35	82.6	219.97	10.17	20.24	96.78	37.55	99.74	97.84	163.95	8.03	28.72	98.1	59.68	46.76	23.21	114.62	7.47	45.18	49.63	20.25	19.12	17	57.68	5.07	22.01	88.92	29.47
58.17	0.17	184.25	26.49	327.48	0.29	0.09	56.89	37.73	185.19	12.29	49.28	66.33	20.38	62.46	35.91	179.8	16.36	16.38	57.49	19.97	160.34	155.76	241.31	17.13	29.92	97.14	64.55
59.01	0	286.24	18.75	208.19	0	0	112.06	105.89	202.53	8.61	28.2	94.49	52.28	52.2	42.53	214.99	9.91	43.33	81.48	19.78	50.36	43.99	177.8	10.5	12.24	87.35	24.74
115.88	111.05	174.16	9	34.68	95.83	63.76	70.33	69.21	156.87	8.76	13.76	98.39	44.12	83.16	79.17	141.83	8.16	15.13	95.2	55.82	42.5	22.52	116.67	8.33	38.52	53	19.3
23.86	18.59	58.3	3.32	36.88	77.92	31.89	66.56	65.88	121.59	6.93	16.7	98.97	54.18	27.53	10.57	106.73	6.97	47.18	38.39	9.9	65.09	58.56	186.07	10.29	31.28	89.96	31.47
29.81	22.3	77.33	8.39	26.82	74.79	28.83	68.9	40.23	222.6	17.5	67.58	58.39	18.07	69.34	13.44	149.96	23.95	112.11	19.38	8.96	34.2	4.13	98.3	11.29	86.36	12.09	4.21
31.77	8.33	69.02	4.53	54.4	26.23	12.07	46.61	36.73	169.34	10.63	32.64	78.82	21.69	45.73	41.18	121.06	9.8	22.05	90.05	34.01	119.56	113.95	215.92	7.86	33.7	95.31	52.77
123.68	117.99	253.29	11.93	29.58	95.4	46.58	56.44	33.47	132.38	10.36	27.2	59.3	25.28	78.92	70.94	206.14	10.39	22.27	89.89	34.42	49.89	18.02	100.76	6.43	46.08	36.12	17.88
76.75	44.7	158.54	13.45	31.64	58.24	28.19	137.1	129	238.9	9.88	25.45	94.09	54	48.81	12.15	220.23	13.22	98.6	24.88	5.51	74.99	72.18	135.27	6.93	34	96.26	53.36
42.31	28.65	138.92	10.02	16.32	67.71	20.62	58.13	51.77	216.81	10.65	24.48	89.05	23.88	132.55	127.9	239.97	10.28	32.01	96.49	53.3	49.37	16.35	145.37	7.27	53.19	33.12	11.25
23.46	14.07	83.43	5.19	46.24	59.97	16.86	87.67	84.88	160.3	9.4	18.36	96.81	52.95	50.87	39.9	216.72	10.47	34.39	78.44	18.41	44.54	23.9	101.14	6.72	48.96	53.67	23.63
82.74	76.44	181.55	10.44	15.86	92.39	42.11	47.42	35.63	100.87	7.33	45.39	75.13	35.32	73.21	68.63	112.92	5.19	35.08	93.74	60.77	16.01	1.23	49.56	11.43	72.76	7.67	2.48
71.52	60.67	133.45	7.41	41.27	84.83	45.46	135.1	134	249.58	11.22	33.96	99.19	53.69	68.7	66.24	163.57	13.58	21.76	96.42	40.49	62.51	30.28	123.35	8.14	50.9	48.44	24.55
111.79	109.33	203.63	17.73	24.55	97.8	53.69	89.09	82.92	216.07	12.48	22.96	93.07	38.38	55.29	29.75	140.37	9.4	37.14	53.81	21.19	68.31	65.98	194.32	9.78	23.8	96.59	33.95
64.9	57.71	163.72	9.25	29.35	88.92	35.25	50.34	26.28	103.54	5.63	41.96	52.21	25.38	71.32	69.85	171.46	13.4	20.91	97.93	40.74	91	85.49	123.55	4.13	50.63	93.95	69.2
67.16	9.16	176.86	20.36	151.02	13.64	5.18	113.51	106.94	219.81	9.68	32.64	94.21	48.65	57.64	34.24	110.74	7.11	24.51	59.4	30.92	79.55	33.73	186.35	21.11	23.94	42.4	18.1
57.01	54.88	113.04	10.71	14.28	96.27	48.55	43.28	9.42	129.14	11.43	54.47	21.76	7.29	33.9	6.78	71.61	10.64	99.73	19.99	9.46	92.26	88.06	144.04	9.24	34	95.45	61.13
130.47	127.76	227.76	10.46	34.49	97.93	56.09	44.99	20.87	135.06	9.9	49.64	46.39	15.45	100.81	96.05	168.38	8.91	18.3	95.28	57.05	57.72	45	124.48	12.52	25.75	77.96	36.15
75.5	37.55	175.79	19.96	48.01	49.73	21.36	21.64	8.4	75.01	7.99	77.03	38.84	11.2	24.38	10.07	69.23	23.43	48.76	41.28	14.54	50.03	44.94	228.47	10.6	26.52	89.83	19.67
161.82	159.71	230.07	11.44	29.24	98.7	69.42	46.75	22.16	159.65	10.12	43.52	47.4	13.88	79.62	77.64	108.01	4.85	23.12	97.51	71.88	48.29	11.08	104.07	6.19	61.21	22.95	10.65
111.09	106.6	172.5	9.34	26.82	95.96	61.79	66.19	41.49	205.38	12.69	28.89	62.68	20.2	54.8	49.23	166.76	9.63	24.7	89.85	29.52	25.22	13.49	91.08	6.29	39.2	53.51	14.82
87.23	79.51	193	7.61	21.76	91.15	41.2	75.37	54.78	205.36	12.19	16.32	72.69	26.68	58.55	54.81	181.73	9.88	16.46	93.62	30.16	149.86	141.47	203.92	11.46	32.7	94.4	69.38
76.47	70.63	200.98	11.48	18.3	92.36	35.14	48.46	32.59	129.07	13.23	17	67.25	25.25	21.9	8.61	109.1	6.18	45.39	39.29	7.89	80.19	75.08	237.82	10.63	22.44	93.63	31.57
134.22	130.19	206.93	7.81	31.83	97	62.91	62.02	46.7	190.74	9.82	45.76	75.3	24.49	71.62	34.56	179.32	9.75	47.52	48.26	19.27	19.92	6.26	63.45	5.75	47.02	31.43	9.87
43.17	24.27	165.13	8.79	45.76	56.22	14.7	124.27	114.69	207.83	10.75	25.53	92.29	55.18	108.63	106.9	168.47	10.61	24.48	98.41	63.45	44.36	27.74	129.72	8.42	21.32	62.53	21.38
37.46	14.01	90.29	17.02	97.92	37.41	15.52	62.36	46.98	189	11.21	39.2	75.34	24.86	113.79	109.34	188.45	10.48	27.88	96.09	58.02	46.71	12.86	111.57	7.67	42.44	27.54	11.53
55.28	30.81	158.62	10.42	36.09	55.73	19.42	39.7	13.84	94.58	6.69	46.77	34.86	14.63	98.85	89.15	235.39	10.79	33.4	90.19	37.87	62.69	20.55	180.73	22.74	46.08	32.78	11.37
142.17	138.35	196.1	10.92	30.28	97.32	70.55	140.47	137.09	241.68	8.31	35.77	97.59	56.72	86.08	57.29	200.38	11.75	39.66	66.56	28.59	53.53	31.33	196.62	12.31	50.69	58.52	15.93
33.69	13.49	77.54	5.55	87.04	40.04	17.4	136.4	133.58	204.21	10.65	36.45	97.93	65.41	48.78	3.21	83.2	5.45	42.44	6.59	3.86	55.51	36.75	197.55	9.65	51.58	66.2	18.6
70.49	48.47	221.66	12.02	34.49	68.76	21.87	72.81	58.84	159.48	10.56	38.3	80.81	36.89	49.63	23.64	186.88	10.66	45.56	47.64	12.65	123.01	119.33	283.84	15.65	43.12	97.01	42.04
22.14	10.7	62.88	5.12	48.71	48.33	17.01	110.32	101	196.4	11	22.7	91.55	51.42	36.66	13.42	83.01	8.11	56.32	36.62	16.17	67.94	62.5	214.58	11.1	21.63	92	29.13
37.18	22.59	86.42	5.55	28.23	60.75	26.13	119.78	110.12	207.19	9.61	25.05	91.94	53.15	40.99	23.7	83.15	5.81	43.33	57.81	28.5	55.58	33.62	159.79	12.98	50.21	60.49	21.04
156	148.49	240.34	10.14	31.64	95.19	61.78	80.72	73.99	205.37	11.62	23.51	91.66	36.03	72.02	64.74	199.75	30.27	25.64	89.89	32.41	62.04	35.51	226.87	13.49	53.5	57.24	15.65
82.02	79.83	200.89	11.41	19.04	97.33	39.74	65.85	46.02	203.28	14.51	24.81	69.89	22.64	138.57	133.7	159.05	17.25	25.28	96.48	84.06	58.89	45.98	174.12	9.25	19.72	78.07	26.41
32.34	22.32	72.22	6.32	30.98	69.02	30.9	66.14	50.91	212.77	10.81	48.15	76.98	23.93	130.24	125.92	212.57	10.06	26.59	96.69	59.24	27.14	14.24	86.67	6.42	34	52.47	16.43
69.44	56.29	181.98	14.48	22.7	81.07	30.93	58.79	41.39	217.14	13.22	45.31	70.41	19.06	73.22	61.88	202.67	18.02	19.04	84.51	30.53	64.57	59.49	259.58	9.65	25.84	92.14	22.92
24.55	10.84	84.17	5.75	45.64	44.15	12.88	39.08	17.55	120.62	9.05	57.09	44.91	14.55	80.89	58.13	205.66	10.52	43.52	71.86	28.26	180.57	173.88	245.53	8.19	42.84	96.29	70.82
78.39	72.06	210.65	12.62	22.25	91.92	34.21	71.4	65.87	234.24	9.98	30.61	92.26	28.12	54.78	49.63	106.57	7.69	39.89	90.59	46.57	82.51	77.87	207.96	9.14	26.82	94.37	37.45
31.53	29.47	64.82	3.67	36.92	93.47	45.47	28.82	14.36	95.74	6.02	26.44	49.83	15	63.71	57.29	125.57	5.86	47.31	89.94	45.63	48.72	12.19	93.01	8.5	42.16	25.03	13.11
37.87	12.3	76.87	5.62	59.84	32.47	16	62.91	10.36	139.49	10.68	33.7	16.47	7.43	41.45	38.93	114.64	10.62	15.39	93.91	33.96	86.32	77.47	225.35	14.29	22.44	89.74	34.38
58.2	56.34	173.92	10.09	16.32	96.8	32.39	31.08	20.91	95.19	10.57	26.44	67.26	21.96	85.91	62.32	219.98	13.09	25.74	72.54	28.33	141.67	139.3	220.26	11.9	27.81	98.33	63.24
86.31	77.26	153.63	7.2	14.78	89.51	50.29	68.7	65.34	151.56	9.86	15.64	95.11	43.11	86.93	83.52	174.89	9.38	16.32	96.07	47.75	27.4	8.49	76.65	6.91	66.72	30.98	11.07
140.5	133.04	207.28	9.17	36.18	94.69	64.18	91.97	87.61	180.32	10.41	18.57	95.26	48.59	51.71	41.24	159.04	10.92	30.6	79.76	25.93	51	44.18	199.95	12.51	26.52	86.64	22.1
66.42	59.38	184.1	10.76	32.33	89.41	32.26	69.81	61.72	135.09	9.51	32.34	88.41	45.69	13.22	10.53	46.17	2.37	51.44	79.63	22.81	56.6	35.03	196.55	11.23	62.56	61.89	17.82
66.93	61.17	179.39	10.93	21.63	91.39	34.1	37.62	17.77	104.89	10.17	41.96	47.23	16.94	58.64	43.22	182.09	9.75	27.2	73.69	23.73	35.98	5.04	125.63	8.68	19.72	14.01	4.01
98.22	72.89	203.72	20.83	22.13	74.21	35.78	150.02	148.94	234.73	9.74	38.76	99.28	63.45	90.6	58.04	222.26	13.96	36.18	64.07	26.11	133.55	131.08	237.63	10.04	33.7	98.15	55.16
71.22	49.74	216.23	12	34.19	69.85	23.01	39.39	20.72	86.48	5.29	57.8	52.6	23.96	148.5	144.55	229.95	8.91	41.19	97.34	62.86	74.68	72.75	169.12	9.54	19.47	97.41	43.02
50.19	13.74	134.11	10.62	54.4	27.37	10.25	105.16	101.84	216.5	9.7	35.77	96.84	47.04	73.94	69.09	214.13	10.99	28.2	93.44	32.27	80.88	76.84	197.77	9.94	25.54	95	38.85
147.92	142.75	192.17	12.11	25.95	96.51	74.29	45	37.87	102.75	9.57	29.17	84.16	36.86	55.65	46.84	89.52	5.92	47.31	84.18	52.33	20.12	16.42	78.09	4.31	50.69	81.62	21.03
112.22	101.53	194.48	9.43	24.35	90.47	52.21	58.37	22.97	115.34	7.21	38.96	39.35	19.92	115.72	112.04	223.28	13.01	28.86	96.82	50.18	140.01	133.8	165.24	5.4	29.24	95.56	80.97
29.78	17.33	85.97	4.07	55.08	58.19	20.16	51.48	39.18	198.02	11.39	27.14	76.1	19.78	112.99	108.53	185.36	10	29.57	96.05	58.55	52.69	12.1	110.98	7.99	46.92	22.97	10.91
25.67	1.07	80.89	5.9	183.04	4.18	1.33	61.92	58.02	212.23	8.96	22.01	93.7	27.34	54.6	20.56	173.46	12.29	50.23	37.65	11.85	86.72	80.68	213.74	11.37	29.92	93.03	37.75
59.51	57.62	140.07	7.64	14.28	96.83	41.14	41	12.49	86.07	9.25	61.9	30.46	14.51	28.23	9.08	93.55	5.02	95.89	32.15	9.7	57.9	38.84	149.52	11.1	28.56	67.08	25.98
56.25	33.8	181.21	12.47	46.08	60.09	18.65	108.66	103.23	185.02	7.99	27.4	95	55.79	123.95	114.99	180.7	8.71	22.53	92.77	63.64	51.28	32.58	203.78	11.98	50.21	63.52	15.99
77.11	71.7	201.67	9.19	27.14	92.98	35.55	51.52	35.66	148.08	6.86	30.28	69.23	24.08	68.93	66.33	166.24	9.01	21.32	96.22	39.9	121.47	117.38	176.28	7.89	34.48	96.63	66.59
39.57	11.4	74.81	7.55	39.18	28.81	15.24	72.34	69.03	230.36	9.91	23.12	95.42	29.96	43.99	16.98	106.91	9.29	13.38	38.6	15.88	154.19	151.47	201.41	10.86	27.83	98.23	75.2
57.78	25.47	196.5	11.19	60.54	44.09	12.96	19.47	0.21	40.5	16.12	336.78	1.09	0.52	51.27	42.29	121.98	8.36	17	82.48	34.67	99.14	95.68	134.76	15.27	32.7	96.51	71
45.4	24.28	128.68	10.52	34.72	53.48	18.87	49.06	15.84	99.49	6.94	61.26	32.27	15.92	63.3	59.41	168.07	8.83	13.6	93.86	35.35	20.27	7.78	61.99	4.07	31.77	38.4	12.56
71.96	64.64	158.19	9.91	21.08	89.84	40.86	62.86	56.79	198.31	10.79	15.64	90.34	28.64	64.89	51.46	209.86	11.51	44.53	79.3	24.52	82.66	71.41	221.13	15.41	23.23	86.39	32.29
52.15	2.83	143.78	13.57	92.58	5.43	1.97	77.62	54.51	193.91	19.11	46.24	70.23	28.11	78.65	30.74	211.94	18.89	21.08	39.09	14.51	153.27	149.7	224.41	10.4	33.4	97.67	66.71
56.09	41.26	206.53	9.89	56.4	73.56	19.98	28.96	11.89	89.61	9.8	66.64	41.07	13.27	71.11	58.37	238.38	8.85	48.55	82.08	24.49	28.34	10.33	129.64	7.93	53.54	36.47	7.97
63.28	57.73	214.98	11.84	17	91.23	26.85	20.39	8.36	64.93	6.59	32.31	40.99	12.87	60.16	36.57	159.94	13.85	24.48	60.79	22.87	124.54	118.51	226.04	8.31	31.28	95.16	52.43
57.05	54.13	163.8	10.42	18.79	94.88	33.05	119.83	112.86	183.4	9.41	22.72	94.18	61.54	138.88	132.9	233.79	9.57	31.64	95.69	56.85	34.98	14.34	91.34	6.79	32.38	40.99	15.7
72.29	60.79	262.26	11.85	27.46	84.09	23.18	115.63	107.37	240.27	11.03	34.19	92.85	44.69	105.24	98.82	180.29	10.14	18.54	93.9	54.81	133.85	130.54	225.89	11.07	36.04	97.53	57.79
64.09	61.28	148.58	8.09	16.66	95.61	41.24	69.28	55.23	187.5	10.33	35.08	79.72	29.46	48.43	6.34	195	13.69	282.87	13.09	3.25	62.3	60.12	187.22	11.88	14.96	96.5	32.11
140.44	138.67	175.54	9.82	19.68	98.74	78.99	156.49	153.66	237.67	10.73	36.72	98.19	64.66	154.07	152.89	217.97	8.68	37.31	99.23	70.14	65.06	62.77	167.31	10.14	14.28	96.48	37.52
139.47	133.26	230.87	10.12	30.26	95.55	57.72	61.41	44.04	188.05	11.65	34.19	71.71	23.42	132.7	125.7	205.38	8.9	30.27	94.73	61.2	33.8	12.61	88.34	9.38	34.19	37.32	14.28
53.82	37.01	119.3	14.64	39.66	68.76	31.02	57.65	33.12	216.28	11.7	48.83	57.44	15.31	152.49	141.39	204.28	12.06	22.27	92.72	69.21	57.49	36.16	231.57	10.83	58.46	62.89	15.61
71.44	30.51	203.18	13.48	56.1	42.71	15.02	64.68	62.12	207.44	8.29	19.72	96.03	29.94	125.72	113.88	221.01	9.19	27.2	90.58	51.53	50	6.39	118.75	7.57	45.05	12.79	5.39
39.89	14.15	183.12	10.23	41.34	35.48	7.73	41.57	34.65	205.44	10.13	27.51	83.37	16.87	67.56	42.66	181.52	9.7	30.98	63.14	23.5	41.78	29.37	178.16	11.11	38.76	70.29	16.48
53.73	34.62	123.28	15.55	171.19	64.43	28.08	142.4	132.78	242.4	9.98	29.54	93.24	54.78	81.9	81.06	180.22	11.19	28.56	98.98	44.98	49.95	45.23	207.3	10.26	25.74	90.56	21.82
23.44	19.62	63.44	3.16	37.14	83.69	30.92	62.39	58.65	181.66	9.87	16.32	94.01	32.29	77.15	74.91	218.53	9.9	19.72	97.09	34.28	78.24	76.09	143.43	4.32	46.7	97.26	53.05
54.94	34.93	146.09	14.3	15.64	63.59	23.91	59.51	47.45	173.95	15.67	50.1	79.73	27.28	85.79	83.08	139.76	7.78	19.95	96.85	59.45	40.45	10.72	75.21	6.1	33.01	26.51	14.26
105.64	96.62	195.95	9.48	21.08	91.46	49.31	48.64	45.36	99.27	7.75	11.56	93.27	45.7	57.1	35.3	149.4	12.78	34.79	61.82	23.63	61.32	51.78	161.61	12.86	41.32	84.44	32.04
108.19	101.77	182.96	9.96	22.01	94.06	55.62	115.55	108.41	202.59	9.48	24.48	93.82	53.52	130.93	126.8	159.54	4.67	40.12	96.84	79.48	149.53	143.67	275.05	10.67	37.14	96.08	52.23
66.45	59.47	238.05	11.11	37.57	89.5	24.98	86.8	83.03	169.13	8.08	17	95.65	49.09	20.58	7.42	50.29	8.63	276.12	36.04	14.75	121.65	118.74	201.26	11.28	15.64	97.61	59
67.7	53.76	242.36	11.31	35.36	79.42	22.18	45.61	28.42	102.78	9.65	29.92	62.3	27.65	48.65	12.48	114.33	11.87	23.8	25.66	10.92	32.83	12.77	84.82	8.07	59.84	38.91	15.06
67.01	61.99	187.97	10.87	16.9	92.51	32.98	37.36	9.85	93.27	9.42	66.64	26.37	10.56	62.96	42.07	227.28	11.07	51.68	66.82	18.51	145.06	139.4	258.34	9.88	29.41	96.09	53.96
61.89	56.3	164.91	9.05	19.72	90.97	34.14	63.11	35.84	166.47	13.44	44.02	56.79	21.53	33.13	12.24	95.66	10.96	77.44	36.94	12.79	32.19	8.44	72.19	6.68	51.68	26.21	11.69
64.66	3.38	274.82	24.9	83.22	5.23	1.23	94.9	84.74	134	5.68	39.2	89.29	63.24	136.67	132.74	186.77	8.96	28.05	97.13	71.07	71.04	69.7	132.19	8.42	13.86	98.11	52.73
78.73	2.65	167.32	7.59	60.52	3.36	1.58	134.05	129.38	253.88	10.57	32.33	96.51	50.96	58.54	30.23	200.99	10.72	45.76	51.64	15.04	37.33	17.98	111.17	6.94	93.93	48.16	16.17
100.61	71.6	148.58	16.43	49.64	71.17	48.19	47.22	11.01	149.21	19.91	42.44	23.32	7.38	65.31	61.17	186.56	10.82	22.96	93.66	32.79	133.43	126.53	241.91	8.81	28.49	94.83	52.3
90.15	86.15	158.5	10	16.58	95.57	54.35	150.86	147.85	228.31	7.84	38.76	98.01	64.76	138.44	132.97	290.8	29.21	32.5	96.06	45.73	16.94	7.31	55.75	5.5	55.66	43.16	13.11
119.45	104.74	205.27	18.89	20.66	87.68	51.03	78.98	62.83	163.8	10.86	21.57	79.55	38.36	114.18	106.6	214.96	11.17	19.72	93.36	49.59	95.19	87.32	238.78	11.81	32.33	91.73	36.57
99.35	94.74	167.01	9.47	16.32	95.36	56.73	57.77	31.05	135.31	8.79	45.23	53.75	22.95	98.57	96.02	261.98	8.8	26.82	97.41	36.65	52.04	39.24	185.41	11.84	31.81	75.42	21.17
70.09	65	141.63	12.54	11.54	92.73	45.89	80.18	78.26	214.6	9.25	22.01	97.6	36.47	143.93	137.38	202.64	7.08	32.33	95.45	67.79	94.06	75.41	201.99	17.08	28.45	80.17	37.33
51.64	24.8	205.11	10.78	94.23	48.02	12.09	61.55	28.03	149.75	16.58	27.2	45.54	18.72	146.5	136.8	249.34	9.4	31.64	93.38	54.87	35.96	28.7	73.16	3.71	43.14	79.81	39.22
91.97	81.52	163.26	10.68	14.96	88.64	49.93	67.49	65.73	173.76	8.21	19.04	97.39	37.83	112.99	107.44	182.68	8.99	27.51	95.09	58.82	69.11	43.95	165.74	13.96	57.06	63.6	26.52
133.94	128.04	168.22	7.41	22.8	95.59	76.11	106.24	102.84	194.42	9.98	19.72	96.8	52.9	141.94	136.16	265.53	9.68	31.64	95.93	51.28	74.49	72.74	128.08	6.14	21.76	97.65	56.79
66.29	26.13	160.84	14	34	39.42	16.25	110.48	103.08	232.68	8.49	29.92	93.29	44.3	129.97	127.6	203.88	8.04	29.58	98.18	62.59	55.05	25.65	137.4	7.92	52.1	46.59	18.67
54.88	40.4	157.87	13.73	25.16	73.61	25.59	33.85	15.87	103.01	7.47	22.35	46.89	15.41	120.5	112.74	217.9	8.92	22.7	93.56	51.74	101.11	97.65	208.55	10.16	19.01	96.58	46.83
20.99	3.44	56.95	5.83	55.44	16.4	6.04	155	149.75	204.67	10.08	26.52	96.61	73.17	81.64	61.42	202.47	10.62	42.44	75.23	30.33	83.24	76.7	102.44	3.94	45.56	92.14	74.88
66.51	54.71	265.55	9.08	46.43	82.26	20.6	121.54	110.24	213.27	16.81	25.45	90.7	51.69	108.44	104.45	210.91	10.29	19.48	96.33	49.52	118.83	111.94	215.78	10.31	24.35	94.2	51.88
61.77	50.75	166.17	11.85	16.32	82.16	30.54	57.53	53.73	101.12	5.91	25.74	93.39	53.14	68.87	66.34	170.61	10.42	20.63	96.32	38.88	24.94	7.73	84.28	5.4	63.92	31.01	9.18
47.31	19.05	128.6	10.48	69.36	40.26	14.81	67.01	63.81	176.41	8.46	19.01	95.22	36.17	98.9	87.31	180.16	12.24	20.24	88.29	48.46	77.16	73.37	141.07	9.34	15.31	95.09	52.01
117.52	111.54	213.98	10.13	23.39	94.91	52.13	93.08	83.61	176.44	12.54	14.28	89.82	47.39	141.29	129.79	240.37	16.35	30.61	91.86	54	64.94	57.86	206.89	11.79	35.36	89.1	27.97
38.99	24.63	120.04	11.17	22.27	63.16	20.52	132.37	129.49	213.82	7.94	32.41	97.82	60.56	115.26	107.5	218.37	9.7	23.39	93.27	49.23	93.42	84.57	161.89	12.41	27.43	90.53	52.24
46.83	14.12	108.54	8.92	42.64	30.15	13.01	52.36	38.82	192.61	8.77	51.49	74.14	20.16	66.64	55.93	146.24	8.99	39.41	83.92	38.24	60.42	43.09	196.16	9.79	46.62	71.32	21.97
64.53	38.98	180.17	11.97	23.12	60.41	21.64	94.15	86.02	193.07	10.05	17.4	91.36	44.55	68.52	30.56	220.68	12.1	51.68	44.6	13.85	73.61	69.47	105.38	4	42.84	94.38	65.92
119	108.97	202.81	8.7	27.14	91.57	53.73	32.36	11.91	84.66	5.48	59.84	36.8	14.06	47.23	38.3	153.01	10.03	17.2	81.09	25.03	65.92	53.28	240.61	13.1	24.72	80.82	22.14
107.87	105.19	150.8	6.6	32.33	97.52	69.76	55.15	31.11	158.77	14.84	15.32	56.41	19.6	122.41	13.64	213.17	15.14	27.51	11.14	6.4	26.08	3.67	68.77	9.23	74.97	14.06	5.33
39.3	25.96	199.17	10.57	54.34	66.04	13.03	68.06	56.81	181.71	9.54	23.8	83.48	31.27	110	102.96	204.8	10.72	19.04	93.61	50.28	20.19	10.68	68.84	5.5	59.84	52.89	15.51
105.47	100.63	170.4	11.99	24.07	95.4	59.05	67.15	62.28	182.35	9.19	27.14	92.74	34.15	107.26	104.4	181.71	9.69	23.07	97.34	57.46	39.42	30.33	79.05	4.88	14.44	76.93	38.37
52.76	12.64	100.92	5.98	32.64	23.95	12.52	30.03	15.28	75.79	8.44	37.76	50.87	20.16	50.29	27.1	185.21	11.4	25.16	53.89	14.63	115.75	89.41	224.81	13.54	30.26	77.24	39.77
81.95	79.15	150.97	10.74	15.31	96.58	52.42	52.66	43.26	128.99	8.96	31.28	82.14	33.53	125.03	118.3	201.29	9.24	21.76	94.62	58.77	58.01	43.85	187.72	9.68	44.88	75.6	23.36
53.5	15.59	163.86	21.65	70.19	29.13	9.51	54.42	24.43	200.11	10.32	51.39	44.9	12.21	158.04	155.12	271.53	11.12	39.44	98.15	57.13	111.85	103.75	215.39	9.34	25.16	92.76	48.17
119.82	112.19	204.05	9.55	22.44	93.64	54.98	25.8	11.8	83.35	6.09	28.12	45.76	14.16	122.82	112.66	202.42	8.48	24.22	91.73	55.66	36.51	14.07	89.39	6.21	52.96	38.52	15.74
69.04	54.97	114.53	9.99	36.88	79.62	48	70.5	67.89	178.18	9.28	14.61	96.3	38.1	94.3	92.16	206.45	8.76	24.48	97.74	44.64	63.93	3.19	128.53	8.77	43.14	4.99	2.48
40.79	23.93	126.31	9.92	44.88	58.67	18.94	57.68	55.24	119.21	11.4	17	95.78	46.34	106.93	99.87	216.82	9.77	20.4	93.4	46.06	67.31	63.63	108.97	5.87	34	94.53	58.39
30.84	21.14	70.78	3.71	35.08	68.53	29.86	35.33	19.31	102.37	13.95	42.64	54.65	18.86	118.53	111.08	258.97	8.87	26.05	93.72	42.89	43.73	42.21	73.57	2.58	55.71	96.53	57.38
20.38	7.15	54.64	3.83	81.85	35.05	13.08	37.38	24.6	118.81	11.45	36.88	65.81	20.7	159.76	151.78	241.6	13.3	34	95.01	62.82	29.16	6.63	83.67	4.57	56.69	22.74	7.93
61.9	48.42	200.02	11.08	34	78.22	24.21	72.95	61.29	211.03	10.41	36.45	84.01	29.04	140.02	130.92	261.99	8.69	27.98	93.5	49.97	59.42	34.52	166.69	10.31	44.2	58.09	20.71
118.67	106.95	180.93	8.22	23.51	90.12	59.11	24.45	12.71	71.57	4.46	59.15	51.96	17.75	79.56	71.84	207.46	9.52	21.76	90.3	34.63	30.32	9.69	109.6	6.65	55.76	31.95	8.84
101.55	96.48	196.27	9.63	21.12	95	49.16	44.04	15.93	167.63	11.03	57.8	36.16	9.5	83.73	77.86	167.65	10.52	15.82	93	46.44	59.6	36.65	175.4	8.9	41.75	61.49	20.89
57.01	36.98	125.97	11.42	17	64.87	29.35	149.39	141.38	243.08	8.71	34	94.64	58.16	59.7	46.75	151.99	9.38	23.39	78.31	30.76	62.63	58.01	153.62	8.9	16.11	92.63	37.76
61.49	25.35	149.78	9.34	33.4	41.23	16.93	78.12	53.02	186.78	15.85	24.19	67.88	28.39	52.6	38.21	166.27	8.49	41.05	72.65	22.98	157.01	152.79	257.79	13.39	40.58	97.31	59.27
39.59	14.67	104.52	13.48	66.64	37.06	14.04	34.59	18.15	106.68	8.15	51.29	52.48	17.02	92.56	87.79	203.27	12.42	14.96	94.86	43.19	156.68	142.83	240.29	10.3	35.49	91.16	59.44
82.93	75.81	190.63	9.62	20.43	91.42	39.77	89.61	85.13	165.64	7.6	19.71	95	51.4	102.42	98.32	171.28	8.06	22.44	96	57.4	82.99	72.93	188.04	8.94	26.52	87.88	38.78
38.78	28.56	84.61	4.33	31.96	73.66	33.76	49.44	42.96	152.88	12.39	39.18	86.89	28.1	140.29	137.35	276.17	12.5	27.32	97.9	49.73	36.86	4.57	61.58	4.35	36.57	12.4	7.42
54	38.24	180.57	14.32	36.99	70.82	21.18	19.03	8.03	65.84	5.35	41.05	42.2	12.2	116.61	113.13	259.79	9.38	33.01	97.02	43.55	54.3	49.21	180.38	8.98	23.66	90.63	27.28
69.95	48.81	242.43	12.65	37.4	69.78	20.14	132.15	124.17	212.44	10.59	30.98	93.96	58.45	61.83	51.67	168.76	8.11	29.58	83.56	30.62	28.35	9.82	128.11	5.92	32.33	34.65	7.67
97.25	90.8	161.62	10.5	19.23	93.36	56.18	60.36	45.9	207.33	10.03	45.23	76.04	22.14	45.93	24.34	146.47	9.03	40.58	53	16.62	62.86	60.82	127.25	5.71	19.26	96.76	47.8
98.44	93.02	176.02	8.75	20.94	94.5	52.85	100.31	97.79	154.84	6.22	39.49	97.49	63.16	58.54	37.15	186.48	11.55	44.53	63.46	19.92	47.52	16.14	108.41	10.51	62.62	33.97	14.89
23.5	5.06	54.67	4.59	61.77	21.55	9.26	65.85	63.32	152.41	12.42	15.67	96.16	41.54	18.99	10.86	55.14	3.49	39.2	57.2	19.7	19.04	4.48	68.93	4.93	46.78	23.53	6.5
120.32	110.98	200.39	10.02	22.44	92.24	55.38	104.65	101.18	169.06	11.13	31.96	96.69	59.85	129.25	125.51	201.92	8.86	25.84	97.1	62.16	37.53	12.94	97.83	8.01	50.79	34.47	13.22
75.25	71.74	188.18	11.58	16.32	95.34	38.12	25.07	14.1	73.28	5.39	41.05	56.23	19.24	101.02	98.3	238.26	7.88	29.92	97.3	41.26	45.5	20.81	115.77	8.66	41.96	45.73	17.97
81.42	75.95	176.78	10.33	16.05	93.28	42.96	24.94	8.8	66.21	4.88	57.77	35.28	13.29	117.19	114.1	218.69	8.31	19.45	97.36	52.17	71.33	67.32	123.39	7.59	32.33	94.38	54.56
138.89	82.7	187.6	22.88	24.48	59.54	44.08	44.79	36.71	163.49	10.74	41.53	81.96	22.45	113.84	110.76	244.02	9.08	21.97	97.29	45.39	86.23	79.3	198.47	10.11	27.88	91.96	39.95
127.49	116.41	223.81	10.07	27.14	91.31	52.01	131.48	124.72	222.84	9.71	31.61	94.86	55.97	43.39	1.43	127.9	9.64	41.14	3.3	1.12	116.07	102.61	188.48	9.85	24.35	88.4	54.44
116.95	107.75	199.01	8.92	24.35	92.14	54.15	47.99	18.42	111.88	7.48	45.39	38.37	16.46	81.66	75.43	200.72	16.93	15.64	92.38	37.58	31.71	14.47	84.61	7.15	62.65	45.63	17.1
67.56	62.83	156.13	9.5	33.01	92.99	40.24	22.57	10.32	49.45	4.15	51	45.71	20.86	73.6	51.1	190.31	9.47	31.96	69.44	26.85	34.62	10.27	110.38	9.49	66.1	29.66	9.3
33.14	15.69	68.79	12.63	80.02	47.36	22.81	91.61	87.03	191.79	27.32	25.84	95	45.38	87.33	67.21	200.42	12.43	27.2	76.96	33.53	110.31	90.28	127.77	9.16	22.53	81.84	70.65
142.75	139.15	190.13	8.62	35.9	97.48	73.19	119.25	108.81	218.16	10.75	31.31	91.25	49.88	38.42	7.78	88.74	7.08	44.71	20.25	8.77	137	133.41	168.58	6.8	36.94	97.38	79.14
68.6	33.71	195.04	12.78	49.64	49.14	17.28	27.3	13.03	62.54	3.42	53.58	47.72	20.83	69.73	47.11	236.95	12.97	38.52	67.57	19.88	18.84	9.75	70.09	5.68	68.88	51.75	13.91
95.07	87.46	167.68	13.24	44.17	92	52.16	49.62	38.21	140.55	7.91	27.2	77.01	27.19	102.48	98.54	188.55	9.47	20.25	96.15	52.26	52.47	21.74	139.63	27.87	46.77	41.43	15.57
71.36	44.2	153.53	11.12	37.31	61.94	28.79	58.65	49.06	194.89	11.17	44.71	83.65	25.17	119.38	113.2	240.14	10.51	22.7	94.82	47.14	35.02	23.12	91.51	8.94	63.28	66	25.26
59.64	32.58	181.93	13.41	21.17	54.63	17.91	93.85	87.79	171.96	9.24	18.09	93.53	51.05	46.57	12.26	67.23	4.5	31.64	26.33	18.24	33.6	9.83	97.25	8.8	22.08	29.25	10.1
81.62	68.97	233.17	10.1	37.14	84.5	29.58	29.92	14.8	95.17	6.2	37.04	49.47	15.55	85.5	75.52	231.75	10.69	21.08	88.33	32.59	126.11	120.5	159.13	4.76	38.39	95.55	75.73
27.39	5.92	58.3	4.63	77.03	21.61	10.15	123.57	116.39	172.39	7.38	24.31	94.19	67.51	20.67	2.97	48.43	12.53	287.22	14.37	6.13	43.49	29.83	126.22	10.51	24.76	68.59	23.64
130.68	125.37	222.45	10	28.53	95.93	56.36	112.18	100.81	192.37	13.14	18.36	89.86	52.41	81.13	0.14	253.94	15.1	148.37	0.17	0.06	84.62	82.38	185.35	11.4	21.32	97.35	44.44
48.29	19.86	155.45	10.31	71.1	41.13	12.78	39.11	16.22	71.91	5.82	27.88	41.46	22.55	81.18	73.86	206.37	10.64	17	90.98	35.79	51.05	18.14	96.35	6.65	44.88	35.53	18.82
87.36	81.63	165.95	10.94	24.64	93.44	49.19	115.68	109.1	240.78	11.1	23.12	94.31	45.31	137.11	131.49	263.82	11.5	28.2	95.9	49.84	104.09	100.99	245.99	10.51	29.92	97.02	41.05
43.5	21.09	86.03	6.89	16.53	48.49	24.52	88.51	78.51	220.04	8.78	15.64	88.7	35.68	90.97	87.71	205.69	10.19	24.48	96.41	42.64	81.35	74.83	181.78	16.6	26.44	91.98	41.16
21.61	10.6	67.26	4.59	105.23	49.06	15.76	127.63	121.52	215.39	9.82	23.12	95.21	56.42	93.2	91.77	295.61	10.97	34.09	98.46	31.04	137.15	132.7	254.86	8.6	31.96	96.75	52.07
107.71	97.77	248.29	10.4	24.07	90.77	39.38	125.54	121.26	228.26	9.44	21.37	96.59	53.12	107.2	96.65	229.95	8.89	21.85	90.16	42.03	66.24	56.58	189.51	10.05	39.89	85.41	29.86
73.25	68.01	153.18	10.73	16.05	92.84	44.4	140.3	133.9	241.48	9.11	28.2	95.44	55.45	28.17	3.83	63.42	4.24	73.54	13.61	6.05	130.77	126.03	260.97	7.62	27.14	96.37	48.29
124.02	119.49	239.14	14.58	29.22	96.35	49.97	42.02	24.91	117.43	10.01	29.58	59.28	21.21	90.4	86	294.08	10.22	22.16	95.13	29.24	101.86	93.93	155.41	12.54	15.71	92.21	60.44
118.85	114.21	226.36	9.97	28.72	96.1	50.46	116.87	113.32	228.58	10.6	32.44	96.96	49.57	88.23	85.75	187.01	8.51	17.68	97.2	45.86	74.05	70.33	222.48	8.96	30.98	94.98	31.61
83.99	75.39	207.64	9.53	23.12	89.76	36.31	76.61	68.59	182.61	11.63	14.28	89.53	37.56	23.85	19.18	67.59	4.37	60.52	80.42	28.38	92.13	56.35	207.62	14.62	24.64	61.17	27.14
33.13	7.54	80.46	8.8	60.53	22.77	9.38	30.43	4.14	68.16	4.06	86.66	13.62	6.08	132.61	129.26	252.18	8.61	29.22	97.48	51.26	51.33	39.59	118.69	10.62	40.58	77.11	33.35
58.35	33.89	217.43	11.55	46.62	58.08	15.59	129.53	120.81	215.86	7.09	25.05	93.27	55.97	52.67	4.61	97.18	6.15	52.36	8.75	4.74	83.97	52.75	152.59	15.66	29.58	62.82	34.57
110.05	101.77	220.47	10.59	27.51	92.47	46.16	87.86	79.22	199.02	12.1	21.76	90.16	39.8	132.65	130.88	265.06	10.74	35.67	98.67	49.38	75.99	72.11	112.24	4.6	43.38	94.89	64.25
82.42	78.04	170.18	9.43	14.28	94.69	45.86	86.2	81.8	206.05	10.8	15.13	94.9	39.7	59.38	40.52	188.26	8.79	51.49	68.23	21.52	158.12	153.46	266.7	7.27	40.58	97.05	57.54
70.53	43.93	206.15	9.8	33.32	62.28	21.31	88.94	86.16	214.15	11.87	24.48	96.87	40.23	94.93	90.25	189.5	9.85	16.38	95.06	47.62	117.53	55.08	224.91	16.34	37.93	46.86	24.49
114.48	114.06	164.56	6.09	48.15	99.64	69.31	69.06	35.21	201.34	11.97	50.32	50.98	17.49	132.54	125.67	243.74	8.73	24.48	94.81	51.56	103.86	75.44	161.05	11.21	34.03	72.63	46.84
102.08	98.19	192.45	9.05	21.08	96.19	51.02	103.97	51.06	226.53	16.02	25.16	49.12	22.54	149.94	141.69	273.05	8.62	33.7	94.5	51.89	139.9	138.86	250.8	10.65	41.27	99.25	55.37
97.12	87.71	174.16	7.78	34.68	90.31	50.36	143.7	136.01	217.54	10.53	31.28	94.65	62.52	132.1	125.77	269.97	9.51	30.26	95.2	46.59	15.16	6.08	37.75	4.52	71.11	40.13	16.11
45.85	5.08	166.39	13.91	119.68	11.08	3.05	158.89	156.36	273.92	9.39	36.04	98.41	57.08	60.08	50.08	225.52	11.86	14.28	83.35	22.2	29.67	4.04	94.71	6.41	37.14	13.63	4.27
75.82	72.58	135.37	10.56	13.92	95.73	53.62	52.27	30	165.18	11.21	40.8	57.39	18.16	117.95	113.52	219.11	9.44	27.14	96.24	51.81	70.36	67.57	202.2	13.04	18.09	96.03	33.42
72.45	58.62	228.56	10.92	30.95	80.92	25.65	58.73	36.39	183.73	20.45	21.32	61.97	19.81	132.81	124.2	253.6	10.08	28.84	93.52	48.98	23.43	10.85	82.94	6.24	76.35	46.31	13.08
132.26	128.19	188.08	10.77	29.92	96.93	68.16	38.46	27.54	116.66	10.88	125.8	71.59	23.6	66.69	53.86	214.98	10.58	15.64	80.75	25.05	56.39	38.84	154.13	9.76	14.28	68.87	25.2
131.96	124.78	226.75	8.99	26.14	94.56	55.03	111.43	107.74	217.77	11.65	18.9	96.7	49.48	142.61	137.53	263.37	10.1	37.4	96.44	52.22	46.71	40.07	82.63	4.67	21.67	85.79	48.5
70.46	51.41	178.91	11.45	14.28	72.97	28.74	124.43	113.04	236.05	8.48	27.14	90.84	47.89	91.84	84.44	205.51	9.99	26.14	91.94	41.09	17.56	8.04	73.44	3.98	37.4	45.78	10.95
35.69	25.87	106.71	8.5	23.94	72.48	24.24	29.7	12.47	82.75	7.12	55.76	41.99	15.07	58.37	32.48	172.52	8.86	34.68	55.65	18.83	29.69	20.3	74.87	4.96	49.98	68.38	27.12
58.68	8.65	108.79	6.17	59.13	14.75	7.96	111.7	105.49	215.66	14.12	21.76	94.43	48.91	118.91	108.25	245.31	22.44	20.87	91.03	44.13	11.04	5.43	23.76	1.86	93.84	49.22	22.87
21.76	4.28	63.76	4.47	75.51	19.69	6.72	92.88	84.29	193.83	9.65	18.09	90.75	43.49	111.27	105.49	230.62	9.65	22.44	94.81	45.74	79.89	71.74	214.48	10.63	19.72	89.8	33.45
102.44	98.22	184.73	11.76	17	95.88	53.17	92.05	88.79	170.36	9.35	17.95	96.46	52.12	84.93	79.27	213.7	10.56	14.42	93.34	37.1	64.97	61.73	108.03	8.92	12.92	95.01	57.14
40.46	9.13	142.64	11.12	67.4	22.56	6.4	146.39	144.79	189.03	8.95	27.46	98.91	76.59	143.65	136.9	241.89	9.01	28.89	95.3	56.6	120.81	115.53	141.08	4.77	29.92	95.63	81.89
82.12	71.25	182.16	9.56	19.72	86.76	39.12	114.96	109.1	219.33	11.95	20.67	94.9	49.74	120.62	117.98	208.76	9.22	22.74	97.81	56.51	40.18	36.93	96.28	5.36	14.96	91.91	38.36
130.85	121.26	232.62	10.01	24.76	92.67	52.13	95.27	93.29	134.58	4.81	41.75	97.92	69.32	147.76	138.82	241.54	10.39	35.77	93.95	57.47	71.19	67.05	100.12	3.63	36.04	94.18	66.97
95.94	93.5	179.46	11.09	23.39	97.45	52.1	74.79	28.9	118.71	20.68	43.14	38.64	24.34	52.32	46.66	182.26	12.14	16.51	89.18	25.6	40.31	28.97	102.28	8.59	39.89	71.86	28.32
109.99	102.24	206	10.54	23.23	92.95	49.63	65.28	56.11	125.93	5.82	42.64	85.95	44.56	123.96	119.36	221.42	8.43	23.39	96.28	53.91	101.28	94.71	225.72	9.48	20.87	93.51	41.96
114.01	106.35	203.28	8.9	20.19	93.28	52.32	99.07	95.13	197.95	9.56	17	96.02	48.06	121.72	118.48	218.05	10.07	25.16	97.34	54.33	74.97	17.02	144.55	9.76	52.18	22.7	11.77
25.43	7.82	57.23	4.48	44.53	30.77	13.67	76.5	61.99	198.4	11.47	17.88	81.03	31.24	103.58	101.21	153.59	8.04	32.33	97.72	65.9	60.11	43.02	197.5	11.23	26.14	71.57	21.78
64.18	56.52	254.77	13.74	16.51	88.06	22.18	24.46	16.04	67.86	7.47	31.42	65.58	23.63	147.09	142.13	238.97	7.97	33.01	96.63	59.47	48.4	23.2	165.03	12.81	28.56	47.92	14.05
125.26	118.61	216.9	9.95	21.76	94.69	54.68	106.07	99.78	151.08	6.93	35.77	94.07	66.04	114.02	110.18	188.43	8.78	17.88	96.63	58.47	33.82	8.16	77.38	6.97	38.52	24.12	10.54
101.49	96.64	222.38	10.39	23.39	95.22	43.46	50.45	33.27	196	10.23	45.76	65.94	16.97	129.08	124.62	249.95	8	29.92	96.54	49.86	97.97	94.21	140.56	10.19	23.8	96.16	67.03
113.64	108.17	185.63	10.04	20.87	95.18	58.27	126.03	118.39	236.94	19.42	21.57	93.94	49.97	146.44	142.17	207.24	7.53	39.44	97.08	68.6	140	133.91	237.07	10.21	30.26	95.65	56.49
89.56	85.06	174.33	10.04	17	94.98	48.79	147.93	141.5	230.1	10.63	32.44	95.66	61.5	145.91	142.71	253.92	8.01	35.49	97.81	56.2	125.54	123.19	251.07	10.49	30.26	98.13	49.06
107.05	103.61	185.41	10.93	19.71	96.78	55.88	106.55	97.56	195.28	9.7	20.4	91.57	49.96	153.12	139.19	225.6	13.79	36.45	90.9	61.7	107.83	105.73	186.06	7.92	28.56	98.05	56.82
104.57	95.45	200.35	9.83	21.57	91.27	47.64	59.37	49.68	183.4	16.53	31.96	83.68	27.09	127.94	122.63	196.37	8.96	21.76	95.85	62.45	123.65	117.9	239.63	8.95	25.05	95.35	49.2
41.62	19.2	144.04	12.35	53.72	46.14	13.33	103.95	99.28	191.83	9.91	16.19	95.5	51.75	92.89	87.69	176.39	10.53	15.13	94.4	49.71	113.02	106.23	237.27	8.36	26.52	93.99	44.77
121.02	116.33	197.99	8.6	29.58	96.13	58.76	94.09	65.62	154.14	7.45	41.27	69.75	42.57	82.3	77.78	140.13	8.14	41.96	94.51	55.5	145.62	143.35	262.3	12.74	37.14	98.44	54.65
138.42	137.54	170.1	9.38	19.26	99.37	80.86	148.55	144.08	247.82	9.96	34	96.99	58.14	121.66	106.33	213.89	9.98	23.66	87.4	49.71	120.18	117.01	219.09	9.43	23.39	97.36	53.41
82.5	75.72	163.35	10.42	15.13	91.79	46.36	99.26	89.14	257.2	14.5	15.64	89.81	34.66	45.87	26.94	146.2	10.69	48.15	58.74	18.43	51.18	18.24	107.18	10.15	49.64	35.64	17.02
131.17	125.59	186.28	8.99	30.27	95.74	67.42	103.5	95.91	169.65	8.12	17.3	92.67	56.54	55.73	48.49	184.92	13.58	27.2	87.02	26.22	147.44	129.93	240.79	18.65	24.07	88.12	53.96
10.11	6.15	25.69	5.17	117.35	60.79	23.93	116.3	112.94	226.89	11.2	16.01	97.11	49.78	100.85	95.28	141.71	7.16	18.36	94.48	67.24	116.25	108.7	232.42	9.37	24.76	93.5	46.77
51.72	26.26	148.79	9.58	37.14	50.77	17.65	130.48	123.73	228.91	9.65	23.94	94.82	54.05	66.53	46.24	133.28	12.55	31.18	69.5	34.7	114.34	108.38	219.12	9.71	19.48	94.79	49.46
55.67	30.5	207.09	12.2	33.42	54.78	14.73	120.09	113.9	193.55	10.19	22.01	94.84	58.85	34.31	19.59	123.62	6.37	46.77	57.11	15.85	101.81	96.55	211.29	10.82	21.32	94.83	45.69
12.3	7.09	48.13	4.8	75.31	57.64	14.73	105.2	101.57	199.15	10.22	16.32	96.55	51	95.8	89.69	276.15	8.76	28.53	93.63	32.48	27.12	3.17	60.92	4.2	66.03	11.68	5.2
136.29	124.19	189.98	10.96	23.39	91.12	65.37	103.74	98.84	211.96	11.78	21.82	95.28	46.63	114.76	89.67	193.72	17.33	36.45	78.13	46.29	89.94	88.25	199.5	12.37	19.26	98.12	44.24
40.67	17.01	137.5	8.69	51.53	41.81	12.37	125.21	120.34	210.17	8.16	23.8	96.1	57.26	105.76	99.2	183.32	10.09	16.39	93.8	54.12	104.9	101.24	241.5	12.21	28.84	96.52	41.92
95.72	86.11	213.62	10.39	20.4	89.96	40.31	59.46	48.79	130.55	8.39	31.28	82.05	37.37	104.42	99.11	202.53	8.58	25.97	94.91	48.93	83.25	77.97	183.51	10.43	14.96	93.66	42.49
67.79	62.35	166.2	10.45	16.86	91.97	37.51	66.57	63.05	164.44	8.7	15.82	94.71	38.34	143.96	137.52	276.5	11.38	33.01	95.52	49.74	133.76	34.64	239.79	14.92	27.51	25.9	14.45
148.68	139.98	196.7	8.92	30.95	94.15	71.16	84.7	76.09	135.13	10.97	39.62	89.84	56.31	114.93	106.74	239.51	8.39	32.01	92.87	44.56	141.96	135.9	168.06	8.97	30.95	95.73	80.87
58.11	50.89	130.86	7.86	36.61	87.58	38.89	49.29	25.27	153.4	15.95	14.96	51.27	16.47	98.53	94.49	179.17	10.08	14.59	95.9	52.74	72.2	68.61	182.33	10.9	18.36	95.03	37.63
88.4	85.56	209.21	11.03	27	96.78	40.9	100.56	96.11	200.94	9.63	22.76	95.58	47.83	71.6	69.53	96.64	2.73	42.39	97.11	71.95	80.69	69.02	229.83	10.89	36.04	85.54	30.03
38.9	13.04	80.8	8.22	39.89	33.52	16.14	96.87	84.95	171.62	12.96	19.26	87.7	49.5	45.38	22.4	130.09	11.46	26.93	49.36	17.22	118.34	114.79	173.68	9.76	19.95	97	66.1
118.5	113.82	219.98	12.54	24.48	96.05	51.74	125.66	121.2	234.46	12.71	27.51	96.45	51.69	71.83	62.35	177.99	12.48	14.28	86.8	35.03	108.46	103.18	204.5	10.55	17	95.13	50.45
71.36	60.55	207.86	11.13	16.51	84.85	29.13	122.36	118.86	189.1	8.82	21.82	97.14	62.85	114.23	33.33	247.28	20.31	30.6	29.18	13.48	122.47	113.61	215.66	9.91	24.22	92.77	52.68
72.64	62.78	186.2	8.42	34.39	86.43	33.72	112.12	109.48	183.22	9.13	28.86	97.64	59.75	115.8	113.24	217.09	8.36	31.31	97.79	52.16	133.55	128.49	250.88	9.99	29.58	96.21	51.22
133.35	126.22	273.74	10.43	29.92	94.65	46.11	150.06	146.02	273.19	8.8	33.98	97.31	53.45	86.59	79.99	222.32	11.09	17.1	92.37	35.98	24.16	6.66	67.61	4.52	91.12	27.55	9.84
56.58	43.92	175.72	10.21	35.77	77.62	24.99	81.37	77.8	169.92	9.02	16.32	95.61	45.79	126.9	121.29	269.03	8.5	29.58	95.58	45.08	54.6	35.65	188.26	10.65	50.1	65.29	18.94
116.53	111.12	234.55	10.91	20.43	95.36	47.37	116.83	108.76	220.64	10.42	30.35	93.09	49.29	121.3	48.82	257.18	16.64	30.26	40.25	18.98	119.75	115.44	216.83	8.31	24.41	96.4	53.24
45.25	18.46	104.53	6.76	56.4	40.79	17.66	77.48	67.32	245.28	11.9	19.04	86.9	27.45	118.73	115.44	233.21	10.1	21.32	97.23	49.5	94.37	91.43	175.95	10.78	16.32	96.88	51.96
27.13	9.61	91.95	7.39	93.88	35.43	10.45	24.52	14.66	99.81	10.26	46.08	59.77	14.69	137.42	133.66	234.11	7.76	31.28	97.27	57.09	127.86	79.2	245.89	13.3	28.56	61.94	32.21
139.35	133.24	285.37	11.4	28.2	95.61	46.69	98.73	88.92	189.33	8.96	17	90.07	46.97	140.74	131.03	285.71	7.58	29.58	93.1	45.86	105.16	102.07	196.21	8.76	31.39	97.07	52.02
121.63	112.02	185.72	10.35	19.26	92.1	60.32	43.99	23.7	142.21	10.61	48.83	53.87	16.66	63.18	59.84	105.48	4.99	45.56	94.72	56.74	94.82	90.32	208.22	9.1	18.79	95.24	43.38
69.35	66.17	157.92	8.45	44.02	95.42	41.9	134.94	131.06	225.15	11.11	30.6	97.12	58.21	52.55	36.37	113.57	9.33	28.56	69.21	32.02	32.57	18.27	110.55	6.77	26.67	56.09	16.52
132.51	101.02	208.49	21.35	20.4	76.24	48.45	117.03	109.54	230.83	9.51	23.39	93.59	47.45	70.49	29.91	160.5	11.82	22.08	42.44	18.64	59.72	27.59	186.44	9.27	59.84	46.21	14.8
55.04	50.51	128.57	11.05	12.24	91.78	39.29	54.09	27.77	138.2	15.39	28.89	51.35	20.1	115.62	108.7	200.32	20.86	25.41	94.01	54.26	66.38	48.03	127.45	18.85	31.31	72.35	37.68
95.84	81.65	200.34	22.82	22.33	85.19	40.75	38.47	28.99	76.8	3.35	46.62	75.38	37.76	71.54	69.46	97.46	4.99	52.36	97.09	71.27	40.77	16.11	109.85	11.6	24.76	39.51	14.67
134.47	129.5	259.27	9.34	27.51	96.3	49.95	22.27	14.32	57.16	9.74	41.75	64.32	25.06	31.96	9.99	126.5	8.43	50.49	31.26	7.9	150.31	147.74	260.48	8.79	29.43	98.29	56.72
133.65	121.74	210.57	12.62	21.37	91.09	57.81	115.17	105.02	225.13	7.94	24.76	91.19	46.65	41.07	38.67	85.15	3.83	40.58	94.16	45.41	54.56	25.51	116.29	8.63	27.88	46.76	21.94
100.9	91.44	159.62	6.74	44.88	90.63	57.29	148.48	138.87	272.03	10.59	33.01	93.53	51.05	53.53	36.17	128.35	7.68	33.7	67.57	28.18	87.5	80.56	215.58	10.86	17.81	92.07	37.37
111.26	109.21	239.76	11.4	19.3	98.15	45.55	97.29	90.3	179.05	8.42	17.3	92.81	50.43	120.3	116.44	151.03	9.57	44.09	96.79	77.1	130.87	122.94	241.11	11.08	23.12	93.94	50.99
85.86	14.88	142	6.2	46.08	17.32	10.48	123.54	119.57	204	10.06	19.72	96.79	58.62	123.25	120.26	224.67	10.39	20.42	97.57	53.53	143.3	137.21	204.85	9.71	26.14	95.75	66.98
91.91	81.88	140.47	12.94	21.05	89.09	58.29	111.24	102.24	224.71	7.73	27.51	91.91	45.5	130.24	105.65	244.34	9.48	25.74	81.11	43.24	108.37	103.02	199.56	10.89	19.72	95.07	51.62
65.32	63.24	130.07	6.74	46.24	96.81	48.62	44.46	11.73	100.22	6.31	55.71	26.37	11.7	77.52	75.8	100.75	3.02	49.64	97.78	75.24	127.87	122.55	239.36	10.86	27.88	95.84	51.2
123.44	119.33	185.3	9.53	23.12	96.67	64.4	63.58	48.4	196.63	10.7	40.58	76.12	24.61	127.37	124.4	210	11.06	36.39	97.66	59.24	132.97	128.91	206.61	11.51	29.22	96.95	62.39
89.95	85.7	173.59	9.38	16.62	95.28	49.37	36.01	26.98	99.1	8.11	19.23	74.91	27.22	147.78	138.71	249.61	7.87	36.88	93.86	55.57	104.18	99.61	202.93	9.11	34.39	95.61	49.08
115.14	112.95	185.17	8.4	29.44	98.09	61	136.36	133.65	292.64	11.35	29.58	98.01	45.67	152.16	148.44	262.84	9.13	33.82	97.56	56.48	90.06	88.6	222.39	8.39	34	98.38	39.84
81.05	78.36	144.6	10.85	15.65	96.68	54.19	39.33	8.78	82.76	5.69	29.92	22.31	10.6	64.72	49.78	198.12	15.16	46.08	76.91	25.13	94.55	87.89	218.47	9.35	22.44	92.96	40.23
128.66	120.26	193.92	9.98	23.23	93.47	62.01	77.01	53.78	203.31	8.75	48.15	69.83	26.45	94.62	90.28	220.99	22.39	26.52	95.42	40.85	58.06	37.12	161.62	11.14	43.14	63.94	22.97
128.79	124.41	167.67	7.66	22.76	96.6	74.2	127.42	122.52	207.12	7.99	25.45	96.16	59.16	155.85	149.62	259.97	9.71	35.49	96	57.55	117.49	108.17	221.92	10.19	18.7	92.06	48.74
92.16	85	218.67	14.26	16.51	92.23	38.87	95.1	52.01	223.03	15.47	23.12	54.69	23.32	129.53	123.53	204.05	7.73	28.2	95.37	60.54	131.22	127.92	203.93	8.42	26.05	97.48	62.73
146.22	141.85	198.74	10.66	28.49	97.01	71.38	41.01	10.23	131.53	8.46	79.1	24.95	7.78	133.64	129.22	255.77	9.03	27.13	96.7	50.52	92.55	91.29	120.81	5.27	44.2	98.63	75.56
102.85	97.2	201.88	12.17	22.01	94.5	48.14	43.39	15.14	95.15	9.06	27.2	34.89	15.91	131.31	121.83	233.2	11.63	23.75	92.78	52.24	45.76	9.82	92.28	5.52	85.68	21.46	10.64
145.39	139.3	217.82	9.48	38.08	95.81	63.95	141.07	131.15	225.03	10.12	32.33	92.97	58.28	115.44	111.68	210.7	11.22	27.54	96.75	53.01	68.5	55.7	236.01	12.57	35.49	81.31	23.6
77.66	65.43	117.28	5.53	42.18	84.25	55.79	129.22	122.89	242.37	8.82	30.26	95.1	50.7	55.23	9.31	149.35	8.02	62.33	16.86	6.24	73.09	69.72	146.96	7.29	18.36	95.39	47.44
15.89	3.82	35.35	2.28	60.66	24.05	10.81	88.74	80.77	208.17	9.03	19.72	91.01	38.8	138.04	134.4	267.03	9.8	38.27	97.36	50.33	88.49	77.48	233.66	12.06	19.72	87.56	33.16
94.91	93.07	214.8	9.1	19.48	98.07	43.33	148.64	80.98	255.74	16.39	34.19	54.48	31.67	42.46	20.72	154.99	9.28	50.9	48.81	13.37	146.37	143.4	188.5	8.43	25.12	97.97	76.08
104.8	99.55	187.62	10.13	19.04	94.99	53.06	35.39	10.58	133.54	9.53	63.29	29.9	7.92	56.65	50.2	178.23	8.75	26.44	88.62	28.17	125.89	112.2	219.88	13.26	30.51	89.12	51.03
135.59	122.58	206.94	8.45	26.82	90.41	59.24	82.93	77.79	195.38	11.48	16.32	93.8	39.81	42.14	18	167.75	13.13	91.84	42.72	10.73	65.82	63.71	164.11	11.68	13.86	96.8	38.82
89.13	79.22	172.39	15.25	13.92	88.87	45.95	96.36	72.91	212.05	12.26	19.72	75.66	34.38	90.19	86.72	171.86	10.17	13.6	96.16	50.46	95.99	82.85	248.17	10.99	30.26	86.31	33.39
23.78	10.32	69.15	4.2	64.65	43.39	14.92	77.4	36.75	264.89	15.58	64.65	47.48	13.87	141.57	136.47	221.47	12.65	31.28	96.4	61.62	52.03	21.88	193.22	12.85	52.27	42.05	11.32
125.77	119.4	184.28	10.33	22.96	94.93	64.79	122.98	119.98	288.49	10.9	29.57	97.56	41.59	127.33	123.21	304.76	10.71	29.58	96.77	40.43	32.81	16.09	97.29	6.25	37.4	49.03	16.53
60.71	18.74	222.49	27.6	105.23	30.86	8.42	110.59	102.36	206.13	11.13	21.02	92.56	49.66	113.44	105.48	198.78	8.94	19.04	92.98	53.06	127.13	110.13	249.55	11.3	24.48	86.63	44.13
66.57	62.91	151.26	9.18	14.77	94.49	41.59	124.33	119.73	197.84	7.82	25.32	96.3	60.52	141.52	134.77	222.26	10.16	30.6	95.23	60.63	124.45	122.22	235.27	8.7	27.88	98.21	51.95
127.56	123.56	195.71	13.49	28.38	96.86	63.13	26.55	8.35	86.44	9.62	89.08	31.47	9.67	90.8	86.29	157.17	8.52	15.67	95.04	54.9	126.77	121.07	204.64	8.98	23.94	95.5	59.16
48.91	41.17	106.19	6	34.39	84.18	38.77	104.77	95.92	197.82	9.31	17.1	91.55	48.49	144.17	140.74	207.52	12.14	29.24	97.62	67.82	43.99	20.72	106.12	13.76	60.52	47.1	19.53
76.99	70.71	157.71	13.38	21.57	91.83	44.83	75.02	65.57	216.01	9.04	31.96	87.41	30.36	129.44	121.82	250.72	10.08	23.41	94.11	48.59	124.69	122.16	181.87	8.78	21.58	97.97	67.17
144.07	141.85	227.61	10.01	26.49	98.46	62.32	77.7	71.99	138.3	6.53	35.76	92.65	52.05	119.35	115.93	254.19	10.68	28.89	97.13	45.61	118.23	115.3	184.85	8.18	25.24	97.52	62.38
44.58	27.73	67.76	10.76	59.84	62.2	40.92	60.15	21.64	205.14	12.73	70.72	35.97	10.55	79.81	64.77	170.87	20.28	18.85	81.16	37.91	49.55	4.54	150.73	13.1	53.7	9.17	3.01
66.57	65.71	80.72	5.81	24.35	98.71	81.41	136.94	123.37	213.34	9.85	38.52	90.09	57.83	124.5	118.85	225.89	11.15	23.39	95.46	52.61	110.69	70.93	255.27	11.98	42.16	64.08	27.78
122.04	114.05	211.53	12.95	23.23	93.45	53.91	128.03	123.36	244.44	10.99	22.01	96.35	50.47	82.22	61.55	237.83	10.61	23.07	74.86	25.88	47.4	32.88	169.79	12.31	31.96	69.35	19.36
65.69	45.13	215.51	12.21	29.57	68.7	20.94	131.45	112.91	252.06	15.7	24.35	85.89	44.79	107.37	100.75	163.57	8.61	21.57	93.83	61.6	132.94	128.38	255.65	8.7	32.22	96.57	50.22
121.86	118.67	234.79	10.81	27.51	97.38	50.54	127.55	121.81	209.79	8.53	25.05	95.5	58.06	126.23	115.22	297.99	11.82	27.27	91.28	38.67	91.42	82.48	233.06	8.25	29.52	90.22	35.39
36.59	28.96	121.74	10.98	15.15	79.15	23.79	140.82	134.17	223.16	9.08	24.35	95.28	60.12	142.36	135.79	210.25	10.15	24.07	95.39	64.58	69.83	53.24	233.56	14.21	46.77	76.24	22.79
52.25	30.15	119.57	7.39	44.88	57.7	25.21	83.99	74.15	228.72	10.29	25.23	88.28	32.42	125.24	122.84	227.04	9.39	27.2	98.09	54.11	116.79	111.99	179.12	9.69	18.36	95.89	62.52
93.73	88.38	224.23	9.78	20.42	94.3	39.42	116.56	103.23	262.34	11.51	20.45	88.56	39.35	73.32	38.06	234.59	14.75	45.36	51.91	16.22	147.04	142.58	209.11	11.69	31.64	96.97	68.19
86.25	71.14	167.37	10.37	14.96	82.47	42.5	120.78	63.97	261.16	18.4	39.44	52.96	24.49	81.71	79.65	173.96	8.94	14.44	97.47	45.78	145.18	142.12	241.02	9.61	31.28	97.89	58.97
127.77	118.13	191.42	9.36	20.63	92.45	61.71	97.5	90.15	229.37	9.72	21.64	92.46	39.3	28.19	12.95	66.48	7.35	39.41	45.94	19.48	119.01	111.78	207.37	9.02	23.8	93.93	53.9
125.38	111.14	220.07	10.21	21.32	88.64	50.5	136.07	129.8	260.34	9.22	34.09	95.39	49.86	125.77	117.34	211.37	10.06	22.44	93.3	55.52	127.81	120.52	198.04	9.64	24.07	94.29	60.85
25.43	8.8	83.26	6.42	67.4	34.61	10.57	131.83	123.32	228.67	9.62	26.82	93.55	53.93	116.19	113.85	173.85	7.04	23.01	97.98	65.49	140.41	132.93	231.49	8.99	31.22	94.68	57.42
71.54	62.53	188.01	10.56	23.73	87.41	33.26	35.12	15	80.58	5.38	54.27	42.71	18.61	54.78	38.9	123.07	16.34	116.96	71.01	31.61	149.02	146.19	244.41	10.46	29.92	98.1	59.81
64.57	42.47	161.45	11.6	18.52	65.77	26.3	122.36	107.03	225.84	10.38	21.76	87.47	47.39	23.68	12.3	117.62	8.54	14.61	51.94	10.45	47.5	19.78	149.29	11.86	67.58	41.64	13.25
127.47	124.54	135.9	5.96	23.8	97.7	91.64	111.45	106.92	209.48	10.26	19.48	95.94	51.04	92.33	86.57	226.94	9.36	28.67	93.77	38.15	31.41	10.43	119.16	8.51	54.4	33.19	8.75
117.52	95.03	194.86	16.99	20.42	80.87	48.77	119.15	109.39	216.22	16.45	17	91.8	50.59	151.83	142.18	212.65	8.69	31.28	93.64	66.86	53.36	25.37	133.4	11.59	26.52	47.55	19.02
33.41	12.04	79.56	6.43	67.4	36.04	15.13	77.86	58.46	216.19	10.41	29.24	75.09	27.04	37.47	15.97	84.61	8.79	24.64	42.61	18.87	123.63	116.93	213.02	11.51	32.7	94.58	54.89
106.69	97.84	173.99	9.94	18.3	91.71	56.23	139.42	115.63	256.32	20.29	37.14	82.94	45.11	122.74	108.57	178.36	10.56	26.05	88.45	60.87	60.08	57.89	96.79	4.18	37.14	96.36	59.81
29.61	5.06	110.06	6.02	37.14	17.08	4.59	91.46	87.69	195.44	10.91	15.86	95.88	44.87	86.54	66.71	200.68	11	24.44	77.09	33.24	162.6	160.2	251.87	7.88	38.08	98.52	63.6
149.44	142.88	190.78	10.34	34.39	95.61	74.89	123.15	116.88	198.85	9.69	22.7	94.91	58.78	101.38	96.2	201.59	10.41	17.66	94.89	47.72	119.63	112.69	215.7	10.46	21.08	94.2	52.24
83.67	77.06	175.18	11.02	18.7	92.11	43.99	127.25	118.22	258.93	14.56	25.05	92.9	45.66	140.3	136.01	223.17	8.02	24.07	96.94	60.95	77.86	70.46	222.4	10.81	27	90.5	31.68
129.76	125.1	209.43	17.21	23.39	96.41	59.73	122.14	114.6	197.19	12.8	17.6	93.82	58.11	116.58	109.49	175.23	8.3	20.4	93.92	62.48	154.37	144.16	212.8	11.54	32.64	93.39	67.74
107.34	100.13	214.25	10.85	19.01	93.28	46.74	47.66	40.12	86.35	4.28	38.52	84.18	46.46	46.59	12.1	148.36	11.63	64.38	25.97	8.16	115.47	109.07	231.86	11.88	28.56	94.46	47.04
94.26	89.04	239.58	10.76	17.88	94.46	37.17	104.41	101.67	205.72	9.95	18.3	97.37	49.42	101	96.78	208.7	10.87	17	95.82	46.37	100.11	91.55	181.95	8.27	17.51	91.44	50.31
49.33	20.74	149.32	10.7	40.83	42.05	13.89	99.75	93.73	198.18	10.8	28.16	93.96	47.29	116.43	94.48	202.04	13.72	29.24	81.14	46.76	125.49	118.34	161.45	8.23	35.67	94.3	73.3
124.73	119.07	224.74	16.4	21.76	95.46	52.98	88.69	80.7	132.5	7.15	36.39	90.99	60.91	64.19	43.53	239.25	10.83	40.58	67.82	18.19	132.21	125.88	189.47	7.6	27.51	95.22	66.44
67.55	39.89	166.29	10.82	44.71	59.05	23.99	124.93	117	216.54	13.13	19.72	93.65	54.03	123.48	120.65	185.94	11.66	21.76	97.7	64.89	107.18	98.1	241.87	10.76	22.34	91.53	40.56
58.74	34.83	184.57	12.97	41.75	59.3	18.87	137.8	133.06	259.34	10.17	30.61	96.56	51.31	108.87	82.31	169.25	14.34	31.28	75.6	48.63	144.37	135.76	236.73	13.18	26.82	94.03	57.35
119.14	111.58	220.55	9.83	24.76	93.65	50.59	88.32	83.03	131.67	6.28	44.71	94.01	63.06	135.05	130.07	214.76	8.42	23.8	96.31	60.56	129.28	124.29	251.49	9.73	29.92	96.14	49.42
82.47	72.7	132.21	5.85	39.89	88.16	54.99	70.28	45.67	194.38	12.11	44.02	64.99	23.5	143.91	139.8	217.76	9.98	28.2	97.14	64.2	143.18	139.16	223.45	20.23	33.33	97.19	62.28
123.81	119.18	172.62	8.33	22.34	96.26	69.04	103.22	96.7	195.26	10.44	20.63	93.69	49.52	130.25	129.06	160.73	7.07	23.6	99.09	80.3	148.38	144.28	268.69	15.4	29.92	97.24	53.7
125.52	120.17	246.31	11.84	29.22	95.74	48.79	50.84	39.62	161.48	10.58	31.31	77.93	24.54	39.78	10.05	108.87	8.34	77.52	25.25	9.23	63.6	51.08	180.27	8.63	30.61	80.32	28.34
77.15	71.45	122.66	4.29	42.84	92.61	58.25	107.13	101.62	196.15	9.86	28.53	94.86	51.81	155.68	151.83	219.35	10.58	29.24	97.53	69.22	67.48	59.28	116.25	5.4	57.75	87.86	50.99
73.37	63.5	187.91	12.07	15.64	86.55	33.79	105.31	100.02	197.11	8.62	26.14	94.98	50.75	159.41	155.65	245.5	8.69	33.01	97.64	63.4	46.31	5.21	75.53	6.38	66.2	11.26	6.9
82.84	70.88	177.95	9.4	42.64	85.56	39.83	65.37	20.59	117.13	18.3	27.78	31.49	17.58	136.62	129.31	264.37	9.86	28.56	94.64	48.91	59.32	50.02	137.03	9.39	16.38	84.33	36.5
42.49	37.41	113.07	6.28	31.96	88.04	33.08	135.95	128.72	219.48	10.65	28.2	94.69	58.65	145.59	133.74	199.31	14.68	34	91.86	67.1	110.65	104.57	207.06	9.61	19.04	94.51	50.5
92.58	72.77	190.44	12.87	35.36	78.61	38.21	139.81	135.36	217.04	8.7	28.56	96.81	62.37	64.08	43.64	129.19	7.39	39.89	68.11	33.78	67.74	63.42	203.21	13.73	14.44	93.61	31.21
122.02	118.69	235.01	10.37	24.48	97.28	50.51	76.26	65.32	118.12	4.97	37.79	85.66	55.3	68.02	39.24	105.13	7.04	43.67	57.69	37.33	27.65	25.6	64.02	2.97	40.8	92.59	39.98
101.97	92.35	198.19	12.15	18.3	90.57	46.6	125.76	110.94	236.08	15.69	30.27	88.22	46.99	57.68	32.74	134.49	17.62	129.36	56.76	24.34	126.46	121.39	220.52	10.75	21.76	95.99	55.05
127.93	121.89	247.4	11.8	21.76	95.27	49.27	134.82	129.49	294.64	12.19	45.81	96.04	43.95	82.48	73.41	203.86	11.56	16.58	89.01	36.01	117.96	112.2	178.52	10.44	31.96	95.11	62.85
123.3	116.27	211.04	10.09	19.26	94.3	55.09	75.82	65.41	150.51	7.17	44.13	86.27	43.46	141.79	136.33	213.9	7.78	27.14	96.15	63.74	87.65	85.92	179.19	9.57	16.32	98.02	47.95
113.72	105.51	194.27	11.16	17.86	92.78	54.31	154.65	151.16	244.09	8.92	40.58	97.74	61.93	123.84	115.88	222.97	13.98	23.12	93.57	51.97	144.1	139.76	247.92	8.66	26.52	96.99	56.37
111.77	103.8	178.07	12.3	25.45	92.87	58.29	108	102.04	324.07	22.99	32.22	94.48	31.49	115.17	106.62	197.31	10.46	15.64	92.58	54.04	71.43	69.45	161.53	11.89	17.1	97.23	42.99
67.61	58.69	183.94	10.38	19.95	86.8	31.91	96.37	92.95	180.93	9.59	18.57	96.45	51.37	113.61	106.62	190.33	11.54	21.37	93.85	56.02	39.41	26.31	105.32	7.16	24.08	66.76	24.98
64.08	59.88	114.14	11.06	11.83	93.45	52.47	132.81	123.65	201.44	9.16	22.96	93.1	61.39	102.81	96.2	219.88	11.32	20.91	93.57	43.75	146.95	143.08	225.16	9.98	23.23	97.36	63.55
128.02	117.97	189.04	10.42	27.07	92.15	62.4	31.98	7.12	148.07	8.73	59.84	22.26	4.81	126.13	118.92	203.15	9.73	28.53	94.28	58.54	108.09	102.33	223.42	11.69	26.5	94.67	45.8
65.52	59.41	176.31	11.43	10.95	90.68	33.7	125.56	120.89	201.78	9.45	25.64	96.28	59.91	109.14	104.87	173.86	11.27	19.48	96.09	60.32	138.51	132.61	227.27	7.88	26.52	95.74	58.35
63.02	55.97	177.57	9.61	16.51	88.81	31.52	62.84	48.85	221.27	11.27	28.2	77.73	22.08	131.41	123.63	205.12	10.49	21.32	94.08	60.27	123.01	114.58	223.11	12.1	21.32	93.15	51.36
115.66	109.43	179.17	9.88	27.83	94.61	61.08	27.53	11.14	136.84	8.38	24.35	40.47	8.14	117.57	112.72	255.59	9.35	28.16	95.87	44.1	123.95	117.92	247.2	11.09	39.89	95.14	47.7
131.38	123.39	190.64	8.76	25.05	93.91	64.72	95.39	86.97	206.8	10.91	18.36	91.18	42.06	73.9	61.31	158.18	7.76	51.68	82.96	38.76	86.87	79.55	203.48	7.93	25.52	91.57	39.09
71.03	67.35	126.15	9.18	12.38	94.82	53.39	72.04	43.67	275.55	12.31	44.17	60.61	15.85	115.88	109.75	193.39	9.62	29.57	94.71	56.75	87.52	81.56	218.04	8.8	21.57	93.19	37.41
114.67	110.4	183.83	10.17	19.26	96.27	60.05	123.14	116.69	248.06	8.93	28.53	94.76	47.04	83.26	58.46	172.58	15.38	45.05	70.22	33.88	75.95	69.37	218.39	9.86	24.07	91.34	31.77
76.94	67.9	178.45	10.48	14.28	88.25	38.05	102.45	95.5	217.52	10.86	22.96	93.22	43.9	120.7	116.07	176.45	8.75	21.12	96.17	65.78	129.64	113.02	249.38	13.68	31.68	87.18	45.32
107.41	103.53	169.21	12.04	15.64	96.38	61.18	122.9	120.26	182.25	8.65	25.74	97.85	65.99	147.68	142.75	233.34	8.01	31.28	96.66	61.18	94.95	87.6	144.2	6.2	36.04	92.26	60.74
92.89	82.74	180.09	10.02	17	89.08	45.94	38.16	25.44	94.7	5.77	44.2	66.66	26.86	56.96	49.54	236.29	11.99	14.25	86.98	20.97	28.53	9.14	122.16	9.56	91.48	32.02	7.48
115.99	90.08	222.29	24.9	23.39	77.66	40.52	96.34	91.31	195.17	11.01	17.81	94.79	46.79	14.08	6.98	35.64	4.14	91.8	49.56	19.57	45.3	12.55	116.53	8.58	38.61	27.7	10.77
127.74	124.58	229.52	10.64	29.92	97.52	54.28	121.7	114.87	235.72	11.52	21.76	94.39	48.73	90.72	85.9	180.51	10.07	16.32	94.68	47.59	135.1	126.88	241.05	9.04	30.6	93.92	52.63
123.1	120.74	221.43	9.38	22.44	98.08	54.53	78.01	46.95	188.35	10.91	31.28	60.19	24.93	122.99	120.46	188.82	9.66	23.8	97.94	63.8	108.4	99.19	241.82	10.4	31.96	91.51	41.02
136.09	132.35	182.58	20.46	23.8	97.25	72.49	95.99	91.47	190.51	12.56	30.63	95.29	48.01	106.95	99.93	186.72	11.9	21.08	93.43	53.52	63.86	58.68	105.45	4.69	33.71	91.89	55.65
39.15	19.61	155.77	10.09	15.67	50.11	12.59	129.49	124.73	218.06	9.43	21.08	96.32	57.2	139.5	125.2	203.02	9.55	28.53	89.74	61.67	124.32	122.05	228.86	10.16	22.53	98.18	53.33
132.14	130.75	181.79	10.68	23.66	98.95	71.93	96.1	91.75	289.12	9.38	36.04	95.47	31.73	105.94	99.73	189.42	10.92	16.32	94.13	52.65	122.24	110	242.86	11.17	30.26	89.99	45.29
31.18	10.56	80.1	5.23	53.27	33.86	13.18	51.64	46.24	170.74	11.32	14.96	89.54	27.08	91.35	84.26	204.66	13.83	17.68	92.24	41.17	90.31	82.5	119.27	3.68	37.14	91.35	69.17
92.67	81.5	177.26	11.73	16.32	87.94	45.98	107.48	98.56	198.87	10.66	17.6	91.7	49.56	85.65	81.59	138.95	6.65	40.12	95.27	58.72	41.28	4.1	85.28	8.16	46.08	9.93	4.81
37.99	32.39	68.04	3.51	39.89	85.25	47.6	50.85	29.88	132.84	8.77	38.76	58.76	22.49	134.6	131.58	183.18	8.91	26.14	97.76	71.83	127.88	118.82	220.97	9.72	24.76	92.92	53.77
105.36	99.22	202.81	9.78	19.95	94.17	48.92	94.18	92.62	188.65	9.48	16.32	98.34	49.1	115.93	108.45	218.88	8.91	28.86	93.55	49.55	97.29	94.35	200.79	10.16	33.79	96.99	46.99
137.55	133.94	172.55	7.79	28.56	97.38	77.63	131.34	121.14	235.13	12.26	24.07	92.23	51.52	133.91	129.92	255.86	8.53	28.53	97.03	50.78	166.51	161.4	270.62	9.25	37.4	96.94	59.64
114.3	106.85	203.95	9.83	33.7	93.49	52.39	119.72	109.49	202.59	8.88	26.75	91.45	54.04	143.37	139.57	191.33	8.25	27.14	97.35	72.95	46.52	13.39	155.21	7.54	83.22	28.78	8.62
73.96	23.2	124.96	8.36	38.56	31.36	18.56	16.54	1.8	40.29	3.59	40.8	10.88	4.47	114.66	110.69	172.62	9.02	21.37	96.54	64.12	139.61	133.95	224.21	11.44	30.6	95.95	59.74
43.63	8.08	132.9	9.85	51.58	18.51	6.08	116.43	102.01	239.42	9.04	24.24	87.62	42.61	69.69	44.29	205.78	11.74	29.54	63.55	21.52	121.81	107.9	193.8	9.28	20.4	88.58	55.67
128.46	120.07	212.73	12.15	20.87	93.47	56.44	146.54	142.9	255.42	9.32	34.81	97.52	55.95	121.76	118.37	180.63	7.65	24.76	97.22	65.53	83.15	80.07	206.92	8.32	27.83	96.29	38.7
69.8	58.51	168.71	10.39	15.82	83.82	34.68	124.71	111.41	219.6	9.6	22.61	89.34	50.74	116.18	112.21	185.34	11.11	17.26	96.58	60.54	171.12	161.33	320.62	12.27	28.89	94.27	50.32
69.91	24.98	91.58	3.93	49.52	35.73	27.27	54.8	27.88	185.25	9.36	34.68	50.88	15.05	70.88	68	128.64	6.77	42.84	95.93	52.86	145.6	138.16	192.2	7.47	35.49	94.89	71.89
139.32	138.06	186.47	9.13	26.51	99.09	74.04	128.99	124.59	179.24	7.93	35.41	96.59	69.51	108.35	106.22	250.8	9.7	25.84	98.04	42.35	116.93	112.79	191.83	9.25	19.72	96.46	58.8
74.26	6.75	134.73	15.85	102.48	9.08	5.01	67.04	62.73	169.6	12.57	13.53	93.57	36.99	75.62	46.03	189.5	18.9	46.08	60.88	24.29	131.86	123.51	196.39	11.71	22.53	93.67	62.89
66.71	60.37	125.54	6.64	38.52	90.5	48.09	139.82	134.61	199.46	9.72	24.76	96.28	67.49	77.25	73.15	137.24	6.87	43.33	94.69	53.3	54.12	39.98	235.59	12.37	47.02	73.87	16.97
57.75	46.06	188.56	12.02	13.53	79.76	24.43	117.78	109.95	206.1	10.76	21.82	93.35	53.35	127.81	124.37	233.61	10.81	35.05	97.31	53.24	117.88	112.45	187.14	11.45	18.6	95.4	60.09
89.16	61.65	209.92	9.66	38.08	69.15	29.37	119.43	110.5	199.73	12.1	21.08	92.52	55.32	147.9	140.44	261.79	10.06	34.19	94.95	53.64	36.57	5.67	105.9	9.78	37.71	15.51	5.35
95.03	90.47	187.16	11.99	17.1	95.2	48.34	76.54	70.85	203.46	11.22	14.44	92.57	34.82	43.27	7.8	83.51	10.97	44.61	18.02	9.34	58.87	35.61	222.47	12.64	52.36	60.48	16.01
49.68	23.73	149.27	5.49	91.8	47.76	15.9	124.91	121.19	230.07	23.85	25.16	97.02	52.68	106.35	100.92	179.48	12.22	17	94.89	56.23	153.53	148.15	234.42	8.37	33.01	96.5	63.2
96.22	82.83	181.38	7.71	34.81	86.08	45.66	99.9	84.13	217.17	10.85	17.68	84.22	38.74	29.89	23.59	90.87	9.95	47.02	78.92	25.96	29.23	13.66	84.8	6.31	45.56	46.73	16.11
19.57	10.08	92.04	23.66	55.08	51.48	10.95	134.37	132.44	210.91	7.78	30.61	98.56	62.79	121.74	116.25	233.96	10.07	27.88	95.48	49.69	44.8	22.64	155.77	17.93	64.6	50.55	14.54
110.79	101.46	185.63	9.32	19.95	91.58	54.66	84.63	81.13	185.89	9.98	16.32	95.86	43.64	142.51	137.02	231.76	8.38	29.92	96.15	59.12	76.09	73.72	147.78	9.66	12.24	96.89	49.89
43.27	6.34	75.08	7.22	57.8	14.66	8.45	73.05	62.78	189.18	8.59	29.24	85.94	33.19	118.82	106.73	187.37	7.02	39.44	89.82	56.96	149.57	146.38	262.9	8.14	26.18	97.87	55.68
84.14	14.79	133.77	16.12	66	17.58	11.06	96.1	94.18	130.45	5.59	22.76	98	72.19	48.12	42.05	174.57	12.1	20.32	87.38	24.09	165.03	159.31	250.99	9.78	38.52	96.53	63.47
141.64	138.06	213.29	9.67	24.07	97.47	64.73	29.9	9.06	65.92	5.7	65.28	30.29	13.74	155.56	145.79	257.48	9	34.39	93.72	56.62	120.85	115.2	242.15	10.59	20.24	95.32	47.57
92.74	86.32	160.12	10.42	14.08	93.07	53.91	45.25	12.88	108.47	6.44	57.75	28.46	11.87	65.78	30.76	148.86	18.03	13.7	46.76	20.66	128.7	122.75	213.88	10.99	21.08	95.38	57.39
74.56	59.83	181.23	10.22	25.16	80.25	33.02	46.7	22.11	117.39	7.08	43.14	47.34	18.83	51.07	40.28	89.61	5.2	38.96	78.88	44.95	55.32	38.16	220.78	9.88	38.52	68.98	17.28
132.33	126.5	200.22	7.89	27.2	95.59	63.18	50.93	43.51	136.91	8.28	29.24	85.42	31.78	108.01	101.93	200.48	9.86	21.08	94.37	50.84	91.81	78.64	123.81	5.39	32.01	85.66	63.52
30.98	7.53	53.82	3.33	47.24	24.31	13.99	131.44	128.53	213.6	11.62	27.51	97.79	60.17	87.27	71.34	143.99	14.03	78.2	81.74	49.55	100.34	91.8	205.64	11.3	12.26	91.49	44.64
128.7	126.31	201.02	10.69	32.33	98.14	62.83	62.04	40.43	121.68	6.42	61.21	65.17	33.22	68.84	24.56	162.02	13.73	36.04	35.67	15.16	63.61	49.54	181.4	10.51	31.03	77.88	27.31
127.52	120.99	202.55	13.06	26.75	94.88	59.73	134.78	129.05	230.01	9.16	29.46	95.75	56.11	117	114.61	176.84	11.41	19.95	97.96	64.81	121.23	117.33	189.41	8.96	21.12	96.78	61.94
39.73	17.67	89.92	14.22	14.28	44.48	19.65	82.93	79.58	189.01	10.57	15.64	95.96	42.1	76.95	72.61	243.97	11.53	21.76	94.35	29.76	39.82	19.56	95.22	9.45	60.52	49.11	20.54
100.74	88.73	183.8	11.52	17	88.08	48.27	61.43	30.92	185.41	11.33	39.44	50.33	16.67	33.18	10.1	69.95	4.94	63.92	30.45	14.44	80.79	70.96	213.37	10.41	13.38	87.84	33.26
107	99.44	178.29	13.5	16.51	92.93	55.77	96.81	92.22	293.89	14	24.31	95.25	31.38	62.7	25.88	199.85	9.92	33.48	41.27	12.95	44.32	33.07	128.02	16.97	25.16	74.62	25.83
28.99	10.76	52.11	3.74	53.11	37.11	20.65	49.88	13.64	109.3	5.83	46.24	27.33	12.48	95.99	92.46	166.78	13.51	19.95	96.33	55.44	125.58	120.2	212.43	9.08	23.8	95.71	56.58
52.55	8.64	120.79	9.08	44.88	16.45	7.15	100.63	73.04	197.82	13.12	24.22	72.59	36.92	122.39	117.17	198.22	21.82	20.4	95.73	59.11	140.53	134.43	231.02	8.89	33.01	95.67	58.19
57.05	19.63	195.17	13.03	70.16	34.4	10.06	145.13	140.09	266.59	13.53	37.14	96.53	52.55	153.16	149.09	248.83	11.61	29.58	97.35	59.92	101.88	92.91	218.02	10.62	19.01	91.2	42.62
89.9	80.19	155.25	9.31	37.14	89.2	51.65	107.25	101.56	271.58	9.35	28.45	94.7	37.4	78.53	64.27	156.35	9.3	27.88	81.85	41.11	127.43	124.7	238.3	10.59	35.2	97.86	52.33
29.28	19.98	83.84	6.12	37.83	68.23	23.83	112.46	108.37	222.46	11.02	19.72	96.36	48.71	70.74	50.18	153.6	21.01	55.71	70.94	32.67	27.75	17.81	85.04	5.47	73.75	64.16	20.94
94.65	73.29	151.38	5.1	48.83	77.43	48.41	62.75	60.32	194.27	10.17	16	96.12	31.05	155.55	150.45	265.12	8.27	33.37	96.72	56.75	119.06	115.16	231.11	8.34	28.53	96.73	49.83
157.84	152.74	220.35	8.27	36.04	96.76	69.31	134.7	124.74	247.03	10.26	24.48	92.61	50.5	69.07	43.76	218.33	22.78	25.34	63.36	20.05	85.67	80.68	173.85	10.78	19.19	94.18	46.41
112.56	103.99	204.87	11.04	19.72	92.38	50.76	94.11	74.82	171.31	21.61	28.69	79.5	43.67	87.82	84.54	182.27	8.69	16.32	96.27	46.38	126.8	121.48	198.61	7.77	22.7	95.8	61.16
66.25	58.38	97.14	5.14	29.22	88.12	60.1	71.35	54.35	107.75	4.06	40.94	76.17	50.44	135.37	127.3	237.16	10.28	27.14	94.04	53.67	126.39	120.74	194.97	6.84	30.26	95.53	61.93
79.03	51.99	190.76	17.28	16.32	65.79	27.26	61.1	27.9	186.16	9.97	47.31	45.66	14.99	171.5	166.18	248.53	8.09	33.4	96.9	66.86	76.99	75.53	93.27	3.41	41.75	98.1	80.98
95	83.19	186.28	11.7	49.64	87.58	44.66	18.26	7.63	59.04	5.31	27.88	41.76	12.92	120.13	117.07	238.4	7.95	24.76	97.46	49.11	154.13	145.17	241.55	15.11	39.18	94.19	60.1
121.74	116.1	206.46	11.86	29.21	95.36	56.23	125.32	119.76	247.01	10.23	30.62	95.56	48.48	23.83	9.2	70.52	5.63	74.8	38.6	13.04	118.03	113.72	181.71	8.76	31.28	96.34	62.58
68.55	50.59	160.55	22.52	52.74	73.8	31.51	146.61	141.98	256.82	12.89	33.32	96.84	55.28	121.49	114.47	188.07	9.4	22.44	94.22	60.87	129.8	125.39	231.92	8.46	22.7	96.6	54.07
86.75	78.61	201.98	15.46	16.32	90.61	38.92	28.71	10.92	80.27	5.13	76.54	38.02	13.6	39.47	12.67	141.44	8.52	53.72	32.1	8.96	125.52	118.42	216.3	10.16	22.27	94.34	54.75
32.37	19.31	77.81	7	42.84	59.65	24.81	143.96	135.19	314.51	10.3	31.31	93.91	42.98	79.15	75.54	171.66	10.87	15.64	95.44	44	26.16	14.16	81.58	5.85	47.46	54.15	17.36
67.8	59.3	130.89	7.77	34.39	87.46	45.3	73.63	62.92	137.17	6.33	31.64	85.46	45.87	131.6	122.39	235.52	9.47	26.52	93.01	51.97	163.53	157.8	259.38	10.87	35.77	96.5	60.84
82.6	77.44	162.46	8.42	20.4	93.76	47.67	103.24	89.38	215.48	11.22	17.6	86.57	41.48	48.31	6.57	121.36	10.51	79.32	13.61	5.42	122.29	119.15	176	9.32	33.01	97.43	67.7
74.7	66.04	141.98	6.19	48.15	88.41	46.51	105.23	95.9	194.4	11.09	21.16	91.13	49.33	57.21	52.63	134.17	11.23	14.59	91.99	39.22	149.73	142.29	275.12	8.79	31.31	95.03	51.72
61.21	55.62	135.61	4.47	48.83	90.87	41.02	158.94	153.28	244.4	9.04	31.28	96.43	62.72	121.52	117.27	177.11	11.38	18.6	96.51	66.21	113.55	107.5	179.07	10.45	21.08	94.67	60.03
93.84	88.83	206.41	11.73	14.44	94.66	43.03	46.92	20.53	93.94	8.14	27.88	43.75	21.85	39.15	5.56	113.33	16.39	50.79	14.2	4.9	129.26	124.6	231.71	9.27	24.07	96.4	53.78
138.4	133.4	209.37	9.71	27.51	96.39	63.71	59.29	48.7	188.08	9.49	15.89	82.13	25.89	131.69	107.23	243.55	15.57	31.72	81.42	44.03	67.08	62.75	115.75	5.08	41.27	93.55	54.21
38.72	16.27	77.14	6.41	19.51	42.03	21.09	128.72	122.27	227.16	11.72	23.8	94.99	53.83	57.53	52.74	78.05	3.35	40.8	91.68	67.58	57.59	52.09	194.72	8.89	24.93	90.44	26.75
103.98	98.28	200.5	9.65	18.74	94.52	49.02	124.75	119.18	234.63	9.27	30.98	95.53	50.79	125.32	118.61	212.26	9.79	21.57	94.65	55.88	45	17.48	132.35	13.53	38.21	38.84	13.2
82.29	75.27	186.11	11.92	12.98	91.47	40.44	33.51	5.78	120.07	7.1	72.08	17.25	4.81	70.89	34.4	252.32	14.2	33.79	48.53	13.63	80.96	76.89	145.09	5.21	42.42	94.97	52.99
45.11	12.65	86.43	9.65	50.1	28.05	14.64	41.84	23.06	103.87	11.8	164.56	55.12	22.2	107.85	97.4	172.98	10.27	17	90.31	56.31	153.29	145.89	208.86	13.38	21.76	95.18	69.85
48.32	26.49	113.38	10.32	21.37	54.82	23.36	138.94	131.73	251.73	8.15	26.52	94.81	52.33	59.45	58.29	121.55	10.71	25.16	98.04	47.95	30.54	1.15	104.02	17.17	226.29	3.76	1.1
90.62	84.07	220.02	11.84	34.74	92.77	38.21	148.53	144.45	251.13	12.42	30.95	97.25	57.52	99.7	62.07	191.89	15.01	48.71	62.26	32.35	91.24	75.68	164.01	21.33	44.26	82.94	46.14
76.8	75.11	210.44	10.84	17.19	97.79	35.69	126.32	121.87	220.37	7.9	23.94	96.48	55.3	141.72	137.26	210.47	7.33	32.64	96.86	65.22	128.69	117.41	244.97	25.98	31.64	91.24	47.93
58.1	52.41	177.66	11.56	25.16	90.2	29.5	150.45	133.44	257.01	9.81	32.64	88.69	51.92	144.01	139.17	245.69	8.9	28.69	96.64	56.65	94.82	93.37	203.07	11.08	35.05	98.48	45.98
14.05	8.96	49.68	3.46	47.6	63.77	18.03	66.6	48.55	121.46	11.39	44.71	72.9	39.98	143.88	138.05	323.45	9.42	30.61	95.95	42.68	120.44	118.01	231.13	9.02	27.2	97.99	51.06
93.09	88.5	249.16	10.42	19.95	95.08	35.52	134.76	128.55	211.56	11.48	31.64	95.39	60.76	68.71	59.63	106.16	6.6	39.27	86.78	56.17	131.5	125.43	232.35	10.34	26.82	95.39	53.98
126.47	120.62	236.05	9.68	35.77	95.37	51.1	142.3	137.49	225.69	9.42	26.14	96.62	60.92	73.87	68.71	181.08	9.39	14.96	93.01	37.94	150.88	148.11	206.11	7.59	31.64	98.16	71.86
41.22	19.93	108.97	12.79	12.98	48.36	18.29	132.37	129.55	225.88	9.5	24.48	97.86	57.35	109.07	104.25	217.11	11.45	21.76	95.58	48.02	73.81	62.65	127.16	13.98	44.88	84.88	49.27
77	72.8	235.28	11.15	40.8	94.55	30.94	110.68	102.23	213.91	10.42	19.95	92.37	47.79	92.53	90.8	135.51	8.97	15.64	98.13	67.01	19.7	8.33	72.56	6.34	78.63	42.29	11.48
69.85	68.72	224.1	10.12	22.44	98.38	30.66	129.73	120.77	272.93	9.36	28.53	93.09	44.25	128.51	123.85	237.43	10.46	32.09	96.37	52.16	39.58	7.94	60.26	4.06	32.64	20.07	13.18
29.52	11.74	60.28	4.51	33.32	39.78	19.48	50.73	24.31	105.15	19.33	144.03	47.91	23.12	146.28	139.36	237.26	11.34	28.05	95.27	58.74	123.22	118.68	227.89	12.68	23.75	96.32	52.08
99.38	96.34	217.77	9.15	22.27	96.93	44.24	141.67	134.55	230.15	8.83	33.57	94.97	58.46	71.38	68.32	126.81	5.14	44.88	95.7	53.87	144.44	131.4	277.69	15.74	33.7	90.97	47.32
86.18	78.29	251.05	10.83	25.84	90.84	31.18	129.52	125.87	206.89	9.5	23.77	97.18	60.84	159.12	154.03	278.73	12.92	32.03	96.8	55.26	136.98	134.59	220.94	9.07	29.92	98.26	60.92
49.23	26.95	171.71	8.54	54.34	54.74	15.69	82.96	74.26	205.8	10.03	16	89.52	36.08	74.84	50.01	179.79	10.21	44.53	66.82	27.82	141.21	135.95	228.37	7.63	34.39	96.27	59.53
108.1	99.11	201.67	8.62	19.04	91.69	49.14	96.93	86.8	114.53	3.82	42.98	89.56	75.79	126.8	118.48	234.4	8.62	34.39	93.44	50.54	136.54	134.41	209.22	11.57	34.09	98.44	64.24
18.24	10.63	49.79	5.36	24.64	58.27	21.34	136.59	130.41	230.68	10.23	23.16	95.48	56.53	130.48	126.28	238.39	10.33	33.09	96.78	52.97	39.23	12.95	101.7	10.8	56.36	33	12.73
87.59	82.27	209.73	8.8	19.04	93.92	39.23	126.44	123.74	202.43	9.61	31	97.86	61.13	125.56	118.52	279.82	8.85	29.24	94.39	42.36	38.54	14.57	85.45	10.52	48.28	37.81	17.05
108.26	101.21	243	8.83	22.01	93.48	41.65	137.97	122.11	234.57	10.15	28.12	88.5	52.06	47	19.57	101.62	7.06	21.08	41.64	19.26	78.77	70.23	255.74	10.32	16.58	89.15	27.46
122.55	117.5	222.67	8.02	28.2	95.88	52.77	98.17	93.88	166.41	10.02	16.05	95.63	56.42	147.68	144.28	258.92	10.65	41.96	97.7	55.72	135.91	129.8	228.46	8.58	27.2	95.5	56.81
108.56	104.65	180.69	8.58	20.63	96.4	57.92	111.53	106.19	139.4	7.29	20.43	95.21	76.18	67.31	58.36	156.35	9.27	24.76	86.7	37.33	125.75	115.59	244.07	10.27	32.87	91.92	47.36
54.66	22.29	167.23	15.49	16	40.77	13.33	120.51	116.41	191.68	9.15	28.2	96.6	60.73	126.56	122.94	219.81	10.62	20.87	97.14	55.93	77.52	65.31	172.41	7.4	23.12	84.25	37.88
99.73	96.47	196.43	10.36	20.4	96.73	49.11	103.19	97.53	202.71	13.68	20.18	94.52	48.11	107.92	104.74	216.03	12.6	21.16	97.06	48.49	141.18	137.21	224.7	10.02	36.18	97.19	61.06
109.69	107.39	258.39	9.5	33.7	97.91	41.56	77.21	73.3	124.24	5.46	49.64	94.93	59	48.67	19.48	174.67	11.4	71.81	40.03	11.15	97.4	93.07	162.8	8.45	21.76	95.55	57.17
118.45	115.51	239.52	9.05	33.59	97.52	48.23	118.6	109.4	166.56	9.15	18.57	92.24	65.68	150.75	146.11	204.52	8.86	31.96	96.92	71.44	73.36	70.28	121.97	7.05	22.8	95.8	57.62
20	8.89	54.8	4.3	45.92	44.42	16.22	81.26	71.02	149.37	12.08	11.11	87.4	47.54	43.71	13.24	143.25	10.44	62.65	30.29	9.24	136.06	129.28	234.7	8.94	30.95	95.02	55.09
95.55	91.49	222.74	9.11	19.72	95.75	41.08	87.22	81.33	145.19	7.47	31.64	93.25	56.02	55.05	28.49	194.8	9.96	48.49	51.76	14.63	127.95	121.93	210.69	10.29	21.08	95.29	57.87
89.2	74.28	242.23	10.28	48.28	83.28	30.67	5.54	2.76	16.31	1.16	138.25	49.85	16.93	159.7	151.99	262.77	10.4	32.7	95.17	57.84	72.94	22.55	114.45	4.56	51.39	30.92	19.7
120.53	114.46	234.3	10.66	22.88	94.97	48.85	74.16	36.65	128.5	7.73	30.95	49.42	28.52	86.66	80.64	220.97	10	19.04	93.05	36.49	98.07	96.82	118.42	4.23	41.59	98.72	81.75
153.13	145.91	252.41	9.59	31.96	95.28	57.8	31.27	17.49	56.51	6.24	46.93	55.93	30.95	28.84	19.32	43.43	2.86	30.6	67.01	44.49	57.91	34.7	203.02	8.79	49.52	59.92	17.09
87.37	84.89	163.54	10.78	17.68	97.16	51.91	31.22	14.13	88.03	6.41	20.87	45.26	16.05	40.57	18.39	85.86	6.2	33.24	45.33	21.42	85.74	83.97	105.93	3.09	46.92	97.93	79.27
125.89	120.22	237.05	8.94	31.28	95.5	50.72	133.7	120.11	208.96	9.73	22.01	89.84	57.48	119.3	115.77	199.38	9.6	36.36	97.04	58.06	58.89	56.1	110.1	5.81	39.89	95.25	50.95
127.89	124.81	220.17	11.12	32.7	97.59	56.69	132.99	124.99	189.92	10.82	23.12	93.98	65.81	135.51	124.64	226.48	10.02	29.92	91.98	55.03	141.83	134.52	216.15	9.35	32.33	94.84	62.24
110.53	107.3	231.81	12.34	29.24	97.08	46.29	98.48	82.1	217.08	12.78	16.58	83.37	37.82	138.68	124.07	274.35	13.02	25.84	89.47	45.23	100.69	27.82	237.81	15.37	40.13	27.63	11.7
88.8	83.85	212.2	9.55	19.01	94.42	39.51	148.91	138.37	194.52	11.28	27.4	92.92	71.14	57.54	38.65	184.81	8.92	51.51	67.17	20.91	88.47	67.75	224.47	17.63	25.84	76.58	30.18
116.53	106.99	175.07	9.07	19.48	91.82	61.12	96.65	90.54	151.28	11.88	12.92	93.68	59.85	125.12	116.2	207.87	17.58	24.48	92.87	55.9	52.9	50.34	171.32	11.9	12.24	95.15	29.38
106.97	102.68	204.2	8.51	19.72	95.99	50.29	13.6	5.94	43.35	8.11	97.99	43.66	13.7	105.99	97.38	216.47	10.65	19.01	91.88	44.98	101.65	95.7	194.58	12.1	17.1	94.14	49.18
124.61	122.76	206.94	9.74	32.11	98.52	59.32	89.09	82.5	208.31	9.98	18.57	92.61	39.61	57.43	56.1	110.39	3.69	45.64	97.68	50.82	63.54	54.5	96.14	3.71	44.2	85.76	56.68
30.82	10.77	128.53	23.84	115.15	34.94	8.38	131	127.14	203.75	9.09	26.75	97.05	62.4	132.78	129.01	232.92	10.53	26.14	97.16	55.39	122.04	117.97	223.55	10.34	22.7	96.67	52.77
123.44	118.37	248.5	11.95	31.96	95.89	47.63	128.11	124.4	177.89	9.94	21.82	97.1	69.93	72.3	44.33	206.23	10.03	59.84	61.31	21.49	133.47	125.3	198.3	8.63	23.66	93.88	63.19
127.3	118.93	219.8	12.79	23.8	93.42	54.11	80.79	74.09	186.15	14.02	13.6	91.7	39.8	87.52	77.9	188.97	9.6	15.67	89.01	41.22	125.33	112.31	202.4	25.87	28.65	89.61	55.49
119.72	92.28	327.29	18.67	22.08	77.08	28.2	61.11	56.48	134.86	16.23	21.08	92.43	41.89	71.02	62.93	205.41	12.49	15.64	88.61	30.64	116.14	114.68	186.41	8.41	26.11	98.74	61.52
114.78	105.63	241.45	12.25	23.66	92.03	43.75	117.73	110.75	210.26	11.46	19.72	94.07	52.67	130.64	116.99	219.89	8.49	27.83	89.55	53.2	108.12	104.25	201.5	11.17	29.58	96.42	51.74
99.17	95.63	245.78	9.49	28.86	96.43	38.91	119.79	106.83	170.69	12.49	18.36	89.18	62.59	135.7	131.02	207.94	11.3	33.7	96.55	63.01	112.68	110.43	163.41	9.54	23.45	98	67.58
91.73	83.65	205.74	9.59	19.04	91.2	40.66	139.01	131.01	239.22	9.7	24.76	94.24	54.76	74.27	52.99	185.59	9.2	21.76	71.35	28.55	82.14	65.57	206.27	11.46	40.36	79.83	31.79
64.05	23.33	184.61	11.97	35.77	36.42	12.64	129.81	126.31	183.15	11.44	20.4	97.3	68.96	151.04	145.43	266.96	9.23	33.7	96.28	54.48	129.66	124.43	284.27	11.82	30.6	95.97	43.77
40.08	33.55	60.22	2.87	34.39	83.71	55.71	73.29	68.02	148.35	11.16	13.92	92.81	45.85	39.66	18	136.2	9.62	43.96	45.38	13.21	70.83	64.83	141.31	10.86	11	91.52	45.88
137.02	130.12	259.08	9.43	28.89	94.96	50.22	146.66	142.94	219.42	12.01	25.84	97.46	65.14	95.88	89.71	176.27	12.03	18.52	93.57	50.9	93.09	86.42	162.51	10.85	15.64	92.83	53.18
41.75	13.08	91.11	6.51	30.6	31.31	14.35	171.18	168.32	249.02	9.25	38.76	98.33	67.59	127.79	119.88	249.9	24	28.84	93.81	47.97	139.25	135.53	205.53	9.12	36.45	97.33	65.94
114.44	112.9	218.19	11.42	28.89	98.65	51.74	68.61	65.05	173.31	10.89	24.48	94.81	37.53	41.07	33.31	95.18	5.62	31.39	81.11	35	132.76	127.32	235.51	9.56	25.74	95.9	54.06
62.2	47.33	208.09	11.67	52.96	76.09	22.74	99.63	56.58	170.73	20.94	46.77	56.79	33.14	100.57	86.63	172.78	11.14	16.9	86.14	50.14	145.87	138.02	196.66	8.4	30.62	94.61	70.18
31.43	19.68	48.62	2.75	23.94	62.63	40.48	42.1	14.09	101.82	21.62	223.53	33.46	13.84	138.85	84.25	236.58	29.32	28.2	60.67	35.61	141.5	135.64	247.06	8.35	29.92	95.86	54.9
73.18	65	248.15	11.14	28.56	88.82	26.19	100.88	97.39	250.99	11.9	19.01	96.54	38.8	68.07	9.58	123.94	5.37	38.08	14.07	7.73	117.95	107.3	189.88	10.35	21.82	90.97	56.51
115.63	109.32	224.33	9.95	24.76	94.54	48.73	108.74	101.92	166.91	11.07	16.32	93.73	61.06	111.83	110.12	181.1	13.03	19.95	98.47	60.81	28.2	9.97	72.18	17.05	173.46	35.36	13.81
53.28	33.75	181.29	8.37	46.92	63.35	18.62	83.97	77.51	144.62	8.38	37.14	92.3	53.59	62.3	49.64	133.76	11.8	10.88	79.68	37.11	55.28	51.07	79.57	3.09	44.56	92.4	64.19
32.94	29.24	132.74	10.11	19.26	88.77	22.03	130.79	116.94	203.97	17.11	32.33	89.41	57.33	83.65	56.4	153.72	13.81	23.73	67.42	36.69	67.74	38.58	190.51	10.74	53.72	56.95	20.25
132.09	124.29	225.75	9.8	39.42	94.09	55.06	36.9	2.58	68.69	5.56	84.32	6.99	3.75	80.44	75.17	166.79	9.43	14.96	93.44	45.07	68.1	40.16	102.69	4.11	39.42	58.97	39.11
122.64	116.32	189.61	10.29	27.14	94.85	61.35	95.71	88.5	151.73	9.79	25.84	92.46	58.33	42.76	40.92	63.3	2.33	48.15	95.7	64.64	149.61	146.24	216.47	9.68	25.74	97.75	67.55
120.21	114.42	263.63	8.31	29.92	95.18	43.4	133.76	132.14	199.86	12.41	31.49	98.79	66.12	33.11	6.56	64.52	8.42	26.52	19.82	10.17	130.15	112.04	243.91	12.48	22.53	86.09	45.94
37.32	22.02	116.02	8.84	24.22	59.01	18.98	84.45	77.58	192.08	10.22	21.57	91.86	40.39	46.58	15.97	106.93	7.66	65.96	34.29	14.93	117.04	110.17	216.58	9.14	24.64	94.13	50.87
118.54	112.11	235.99	9.67	27.88	94.58	47.51	96.21	86.4	171.72	8.86	42.64	89.8	50.31	124.92	120.43	216.19	8.98	27.51	96.4	55.71	110.67	102.11	167.2	9	18.24	92.27	61.07
138.39	128.82	230.96	8.51	28.2	93.08	55.78	60.2	50.65	141.82	13.88	33.4	84.13	35.71	128.26	120.03	208.19	10.65	20.18	93.58	57.65	129.12	124.56	204.45	11	20.71	96.47	60.93
121.98	118.2	254.06	10.32	23.8	96.9	46.52	135.26	130.09	193.98	13.33	22.7	96.18	67.06	99.9	93.02	172.87	9.79	14.96	93.11	53.81	127.61	121.63	177.78	7.71	39.89	95.31	68.41
134.56	127.34	278.96	9.18	28.53	94.63	45.65	101.08	94.67	198.47	10.59	18.05	93.66	47.7	45.86	16.96	125.44	7.39	41.27	36.97	13.52	142.99	138.65	168.27	10.38	21.21	96.97	82.4
104.44	95.67	225.08	9.41	23.12	91.61	42.51	89.99	86.17	203.34	11.54	19.95	95.75	42.38	139.34	131.68	239.96	12.3	28.86	94.5	54.88	151.49	149.51	231.37	11.19	30.28	98.69	64.62
82.84	33.95	181.49	9.97	42.94	40.98	18.7	96.95	91.49	127.61	5.99	36.45	94.37	71.7	54.12	35.47	138.38	9.94	46.24	65.54	25.63	145.21	130.3	297.79	16.96	36.45	89.73	43.76
126.47	115.55	228.68	9.19	26.44	91.36	50.53	85.39	81.78	160.9	10.94	37.14	95.77	50.83	138.72	133.54	221.83	8.27	33.7	96.27	60.2	125.81	117.89	204.65	17.42	27.62	93.7	57.6
148.46	143.97	233.08	7.84	34.68	96.98	61.77	65.3	50.98	141.69	8.8	37.57	78.06	35.98	41.46	9.39	101.16	8.64	59.84	22.64	9.28	72.06	65.43	102.38	3.74	34	90.8	63.91
112.02	107.89	209.17	9.67	20.87	96.31	51.58	118	112.2	174.01	11.13	19	95.08	64.48	47.77	35.54	162.73	11.53	36.88	74.4	21.84	78.79	73.16	134.13	6.39	39.44	92.86	54.55
119.93	115.08	225.56	11.12	23.8	95.95	51.02	100.54	90.38	205.74	22.61	17.51	89.89	43.93	128.81	124.51	213.05	11.14	21.37	96.66	58.44	165.41	160.72	240.07	8.06	35.77	97.17	66.95
109.09	100.16	208.77	9.45	20.42	91.81	47.98	66.54	53.67	191.31	9.54	40.41	80.65	28.05	35.72	31.45	67.78	3.14	42.16	88.05	46.41	146.28	135.7	219.77	10.01	34	92.77	61.75
131.18	128.22	325.24	10.53	29.58	97.74	39.42	118.79	112.86	153.65	7.18	17.86	95.01	73.45	128.24	125.75	186.14	7.58	26.75	98.06	67.56	150.21	137.08	202.76	6.99	37.83	91.26	67.61
113.44	110.83	282.12	8.57	27.51	97.7	39.28	111.22	103.01	161.65	6.57	27.51	92.62	63.72	77.35	70.6	149.82	9.25	15.51	91.27	47.12	47.42	27.79	104.19	5.56	34.68	58.61	26.67
57.15	36.5	185.4	9.89	23.23	63.87	19.69	101.3	94.4	199.48	11.26	18.74	93.19	47.32	122.52	114.53	231.43	11	31.64	93.48	49.49	100.39	94.71	187.1	11.18	15.82	94.33	50.62
54.19	42.16	207.68	10.16	37.31	77.8	20.3	141.35	137.66	222.71	9.74	28.89	97.39	61.81	108.83	96.52	194.59	7.66	41.27	88.69	49.6	123.68	113.1	198.49	11.85	21.58	91.45	56.98
115.12	112.23	260.66	9.62	26.44	97.49	43.06	74.85	72.03	124.08	6.56	52.27	96.23	58.05	137.56	132.49	187.93	8.39	29.57	96.31	70.5	140.38	134.45	212.28	9.64	28.3	95.78	63.34
38.48	14.03	98.56	8.35	54.34	36.46	14.23	55.28	2.57	158.09	16.76	61.88	4.65	1.63	133.95	127.9	214.14	10.81	24.93	95.49	59.73	155.32	145.9	223.35	9.29	38.27	93.94	65.32
112.27	103.93	221.03	12.06	21.05	92.57	47.02	71.74	4.21	155.24	13.33	68	5.87	2.71	134.8	126.67	208.24	8.35	24.07	93.97	60.83	134.83	126.23	228.29	14.25	30.26	93.62	55.29
81.6	75.97	214.53	10.89	14.96	93.11	35.41	118.11	111.42	176.28	10.61	21.83	94.34	63.21	117.98	110.3	212.29	11.7	19.04	93.49	51.96	138.84	136.6	233.95	13.63	32.56	98.38	58.39
109.17	102.79	218.6	10.83	21.76	94.15	47.02	117.77	110.71	169.58	9.22	19.04	94.01	65.28	135.24	130.08	243.77	10.8	29.92	96.18	53.36	150.93	74.58	257.58	16.36	35.08	49.41	28.95
45.74	16.29	243.76	9.76	80.25	35.62	6.68	133.06	125.84	201.31	8.21	26.52	94.57	62.51	156.92	155.45	231.59	12.27	28.2	99.06	67.12	84.9	73.41	222.95	11.58	14.96	86.47	32.93
130.48	122.24	241.37	10.73	30.95	93.69	50.65	130.06	117.53	218.02	10.24	21.12	90.37	53.91	68.47	53.62	197.08	8.27	24.51	78.3	27.21	104.06	97.43	176.62	9.83	15.88	93.63	55.16
119.41	113.64	167.31	8.57	23.12	95.16	67.92	70.94	66.91	120.97	6.43	41.48	94.31	55.31	139.17	128.13	214.59	13.51	27.83	92.06	59.71	52.64	47.33	199.73	8.17	20.4	89.93	23.7
132.77	123.73	207.56	9.69	26.14	93.19	59.61	41.32	38.62	68.3	2.61	45.23	93.46	56.55	120.2	113.77	252.81	10.7	26.05	94.65	45	73.9	68.44	136.82	7.14	52.18	92.61	50.02
64.14	50.25	123.42	7.29	43.69	78.35	40.72	13.46	8.7	29.77	7.06	322.02	64.63	29.22	107.14	101.83	170.62	7.85	36.18	95.04	59.68	92.12	90.24	136.43	7.72	46.77	97.96	66.15
152.02	144.44	216.95	9.64	30.27	95.02	66.58	134.06	130.8	204.59	10.99	27.51	97.57	63.94	92.37	86.25	153.14	8.78	31.96	93.38	56.33	78.69	75.77	120.57	7.18	44.67	96.29	62.84
53.6	43.03	185.99	9.45	35.36	80.27	23.14	79.1	73.66	132.56	8.93	14.96	93.11	55.56	42.94	13.49	130.16	7.26	45.56	31.43	10.37	57.07	20.91	120.2	7.59	41.32	36.64	17.39
97.97	89.54	229.52	11.09	19.04	91.4	39.01	99.18	93.9	175.24	11.77	17.19	94.68	53.58	114.45	107.44	267.01	12.44	26.14	93.87	40.24	139.56	138.75	178.7	9.3	24.55	99.42	77.64
80.21	72.76	236.87	10.74	16.51	90.71	30.72	139.33	137.49	174.23	8.87	28.53	98.68	78.91	144.24	138.51	227.91	9.16	31.31	96.03	60.78	120.23	111.42	181.76	9.8	20.42	92.67	61.3
119.57	46.07	256.71	23.2	23.8	38.53	17.95	91.3	88.04	135.11	9.19	22.01	96.43	65.16	102.2	96.98	232.49	10.71	26.75	94.89	41.71	138.44	133.67	192.75	10.09	25.16	96.55	69.34
84.78	82.27	138.51	9.5	15.82	97.03	59.4	65.82	58.36	132.04	11.11	12.52	88.67	44.2	33.56	0.78	76.32	14.47	134.64	2.33	1.02	61.88	33.77	212.41	12.33	66.8	54.57	15.9
111.66	50.5	252.7	22.79	26.52	45.23	19.98	124.55	118.99	162	6.14	23.35	95.53	73.45	134.64	119.74	204.51	8.97	33.87	88.93	58.55	26.26	7.46	65.76	14.27	65.92	28.4	11.34
47.47	16.27	95.98	8.72	47.6	34.28	16.95	36.96	33.91	66.14	2.52	57.12	91.74	51.26	130.42	124.48	259.65	13.89	25.95	95.45	47.94	142.25	136.64	234.21	9.19	28.89	96.05	58.34
110.86	48.07	224.06	26.63	27.51	43.36	21.45	61.31	54.47	147.66	9.14	13.6	88.84	36.89	121.83	117.23	275.58	10.49	28.39	96.22	42.54	43.19	20.18	145.31	9.68	57.06	46.72	13.89
109.15	103.97	173.1	10.32	21.76	95.26	60.06	95.76	91.72	204.11	10.25	17	95.78	44.94	119.53	110	238.51	7.83	30.62	92.03	46.12	112.53	105.74	223.61	17.04	17.45	93.96	47.29
112.48	101.33	219.19	10.91	21.37	90.09	46.23	107.69	104.34	144.11	6.21	41.53	96.89	72.4	56.02	34.45	113.33	4.76	40.58	61.5	30.4	130.71	128.07	220.68	8.08	22.96	97.97	58.03
73.69	66.02	190.59	11.05	20.9	89.59	34.64	116.54	106.49	162.34	8.96	23.8	91.38	65.6	69.96	40.99	205.94	11.38	47.46	58.59	19.9	85.89	67.42	240.96	18.12	45.23	78.49	27.98
54.25	25.34	142.61	8.57	23.94	46.71	17.77	140.47	121.83	274.4	30.18	30.95	86.73	44.4	116.13	107.55	182.11	8	19.54	92.61	59.06	138.98	135.37	212.55	7.87	24.84	97.4	63.69
78.12	72.65	161.44	11.59	11.97	93	45	58.94	17.36	149.7	17.39	65.96	29.44	11.59	92.94	88.78	200.92	8.86	28.2	95.52	44.19	147.2	132.44	195.97	8.21	38.08	89.97	67.58
26.8	4.56	59.05	4.99	32.22	17.01	7.72	128.69	116.66	206.37	11.27	31.28	90.65	56.53	93.16	81.67	199.47	28.15	21.32	87.66	40.94	160.94	158.71	189.6	6.94	33.51	98.61	83.71
35.3	13.47	77.03	11.4	40.6	38.17	17.49	126.71	116.43	228.15	9.55	32.33	91.89	51.03	35.26	16.18	98.74	7.18	41.27	45.89	16.39	134.99	127.47	257.42	11.42	29.24	94.43	49.52
40.27	3.92	107.19	11.96	95.32	9.73	3.66	153.92	151.16	200.83	10.45	33.7	98.21	75.27	64.84	54.2	142.1	9.14	23.8	83.58	38.14	156.92	153.06	274.26	7.88	32.64	97.54	55.81
54.24	25.95	162.68	11.44	38.53	47.84	15.95	107.22	98.85	122.21	6.77	11.4	92.19	80.88	96.5	40.09	121.82	4.34	34.39	41.55	32.91	31.19	17.15	73	4.86	23.8	55	23.5
48.14	20.36	122.65	9.58	25.84	42.3	16.6	99.6	91.19	182.98	9.54	37.84	91.56	49.83	79	75.29	147.88	6.9	26.82	95.3	50.91	152.35	147.37	273.51	8.61	34.68	96.73	53.88
149.79	146.39	226.86	8.61	33.79	97.73	64.53	142.15	131.19	294.71	17.37	29.09	92.29	44.52	42.39	13.37	103.11	8.36	15.67	31.55	12.97	123.24	114.36	184.48	7.95	36.62	92.8	61.99
60.4	38.21	121.57	13.57	36.76	63.27	31.43	116.91	111.64	206.56	11	28.16	95.49	54.05	139.87	133	236.82	10.21	30.61	95.08	56.16	97.74	91.01	155.64	8.32	31.96	93.11	58.47
99.5	89.31	144.41	5.49	45.23	89.76	61.85	93.27	88.54	208.07	15.37	23.12	94.94	42.55	43.7	18.62	96.12	7.82	35.77	42.62	19.38	16.56	4.03	71.8	5.17	48.01	24.34	5.61
98.58	94.74	186.45	10.23	18.79	96.11	50.81	102.7	95.8	194.3	12.11	16.51	93.28	49.3	101.13	95.56	233.95	9.47	17.68	94.5	40.85	48.26	17.05	126.22	10.52	62.56	35.34	13.51
123.75	116.82	209.14	10.88	21.82	94.4	55.86	128.51	124.98	223.27	10.99	25.45	97.26	55.98	132.71	130.53	222.37	7.02	25.46	98.36	58.7	127.19	122.02	235.28	8.92	22.58	95.94	51.86
95.45	66.35	224.27	11.7	17.1	69.51	29.59	56.88	48.57	78.97	3.64	30.61	85.4	61.51	43.72	26.73	96.56	10.36	51.29	61.14	27.68	99.18	92.33	197.45	10.4	17	93.09	46.76
50.98	24.11	189.07	13.14	53.72	47.28	12.75	54.97	53.34	99.16	7.15	25.74	97.03	53.79	157.4	150.53	271.6	10.14	37.14	95.63	55.42	137.26	131.96	179.68	9.32	26.23	96.14	73.44
79.24	72.89	135.65	10.19	13.76	91.98	53.73	116.64	110.53	176.37	11.08	22.96	94.76	62.67	40.98	21.66	93.83	6.63	43.29	52.84	23.08	102.79	95.68	124.63	6.39	27.51	93.09	76.77
96.68	87.56	192.92	10.6	18.3	90.57	45.39	103.38	93.11	130.63	3.35	52.27	90.07	71.28	103.17	96.42	227.02	10.24	15.49	93.46	42.47	53.31	28.15	153.45	12.65	17	52.79	18.34
153.63	146.87	218.33	11.33	28.89	95.6	67.27	103.09	95.98	206.54	9.34	17.68	93.1	46.47	76.28	61.19	210.1	14.51	33.4	80.22	29.12	115.81	112.26	198.82	9	23.73	96.93	56.46
116.61	103.61	160.84	7.08	23.12	88.85	64.42	110.7	107.33	159.37	8.32	19.08	96.96	67.35	127.49	124.74	209.12	8.38	24.35	97.84	59.65	72.38	32.43	137.34	10.32	46.45	44.81	23.62
69.83	12.3	167.28	23.45	220.6	17.61	7.35	77.4	68.94	119.66	6.77	35.5	89.07	57.61	32.37	3.46	66.71	4.91	79.32	10.67	5.18	155.97	148.24	258.54	8.68	33.32	95.04	57.34
113.17	106.11	174.23	9.5	22.08	93.76	60.9	58.41	54.38	82.18	6.44	36.45	93.1	66.17	120.52	116.03	215.49	11.41	19.21	96.28	53.84	100.59	98.27	114.46	4.58	37.83	97.7	85.86
126.07	120.38	257.6	10.91	29.24	95.49	46.73	134.22	129.97	309.1	12.82	30.26	96.84	42.05	133.79	73.17	237.23	10.61	38.52	54.69	30.84	109.59	103.3	208.68	10.26	20.18	94.26	49.5
121.13	109.58	157.2	7.44	28.53	90.47	69.71	94.43	69.88	229.23	10.44	31.28	74.01	30.49	84.3	75.2	182.08	11.3	14.08	89.2	41.3	139.66	136.46	263.78	11.03	31.85	97.71	51.73
135.81	133.19	216.48	11.32	20.63	98.07	61.52	32.44	19.5	105.52	6.62	48.83	60.11	18.48	142.09	133.71	217.27	10.09	31.28	94.1	61.54	129.95	127.27	291.1	8.37	30.95	97.94	43.72
125.26	119.81	166.17	7.43	20.18	95.65	72.1	64.56	59.06	104.94	4.88	44.71	91.47	56.28	152.06	147.38	222.96	8.31	27.51	96.92	66.1	126.22	121.27	194.05	8.61	32.03	96.08	62.5
139.5	132.98	173.35	9.55	27.14	95.32	76.71	26.27	5.64	56.54	5.18	48.96	21.46	9.97	87.57	45.21	207.99	14.71	28.89	51.63	21.74	138.64	136.16	229	8.34	29.92	98.21	59.46
114.29	106.95	228.47	11.21	24.35	93.58	46.81	94.65	84.57	224.62	10.66	21.08	89.36	37.65	64.4	54.47	130.45	7.15	41.27	84.58	41.75	117.87	111.29	221.75	9.2	26.82	94.42	50.19
114.22	104.67	158.14	6.73	33.7	91.64	66.19	144.71	139.29	266.81	11.15	39.66	96.25	52.2	141.81	135.47	232.74	8.78	24.76	95.53	58.21	100.66	97.87	128.27	4.01	44.71	97.23	76.3
92.99	89.99	180.09	11.01	14.42	96.78	49.97	135.34	131.37	236.98	8.67	33.7	97.07	55.44	69.31	62.32	115.47	4.98	46.08	89.91	53.97	151.47	148.25	198.69	12.07	25.75	97.87	74.61
160.19	157.46	263.33	8.76	34	98.3	59.8	60.82	45.88	142.2	9.42	15.28	75.44	32.26	98.56	95.88	143.09	9.09	25.74	97.28	67	111.54	105.71	158.87	6.28	30.51	94.77	66.54
119.12	100.65	201.69	11.43	19.72	84.49	49.9	139.86	135.72	226.2	10.43	27.14	97.04	60	107	83.77	240.43	17.2	36.18	78.29	34.84	137.89	135.26	207.48	8.39	27.51	98.1	65.19
157.04	147.46	233.25	7.91	35.36	93.9	63.22	59.53	52.88	154.62	12.61	36.18	88.83	34.2	151.36	145.85	245.01	8.89	32.64	96.36	59.53	69.54	29.23	206.84	16.25	44.2	42.04	14.13
86.93	78.02	172.19	10.88	15.67	89.75	45.31	146.23	138.24	270.3	9.37	30.6	94.54	51.14	62.97	23.85	218.62	12.47	54.34	37.88	10.91	74.16	69.36	128.89	5.41	43.83	93.52	53.81
129.63	99.56	203.83	20.47	33.09	76.81	48.85	97.03	90.69	218.15	11.02	16	93.47	41.57	56.71	53.44	100.62	5.47	37.83	94.24	53.11	66.52	56.69	228.01	10.19	27.88	85.22	24.86
133.34	124.09	242.87	23.89	21.76	93.06	51.09	63.78	23.78	128.43	11.43	39.2	37.28	18.51	50.06	44	109.07	6.49	20.4	87.89	40.34	126.8	121.19	213.8	10.71	18.57	95.58	56.68
60.43	44.85	184.02	9.79	38.76	74.23	24.37	132.05	126.62	273.87	10.23	27.83	95.89	46.23	157.98	154.65	230.5	9.29	32.85	97.89	67.09	75.12	67.61	139.82	8.71	27.2	90	48.35
25.02	4.09	77.46	5.9	47.02	16.34	5.28	140.26	133.39	217.27	9.42	24.07	95.11	61.4	74.93	64.54	149.22	8.9	14.28	86.13	43.25	39.96	2.36	67.37	3.26	34.39	5.91	3.51
64.89	33.24	228.92	14.83	34.79	51.23	14.52	132.61	125.6	210.61	10.29	23.94	94.71	59.64	101.55	80.49	225.9	14.23	41.96	79.26	35.63	65.65	22.07	145.75	10.47	34	33.61	15.14
112.73	105.88	192.87	8.38	21.08	93.92	54.9	111.25	102.06	177.46	9.41	33.24	91.74	57.51	162.66	159.55	214.38	7.51	37.14	98.09	74.43	84.56	77.62	121.54	4.27	44.71	91.8	63.87
41.6	34.44	116.68	9.06	19.95	82.8	29.52	132.13	127.41	233.22	22.55	29.92	96.43	54.63	126.36	114.25	205.54	16.81	38.66	90.42	55.59	88.44	83.33	189.07	11.48	23.8	94.22	44.07
83.57	76.55	189.41	10.86	16.32	91.6	40.42	29.35	10.83	83.58	8.68	33.33	36.9	12.96	125.46	116.35	207.67	25.95	29.57	92.74	56.03	103.44	98.2	145.49	8.07	34.19	94.93	67.49
22.35	9.51	73.54	22.27	337.96	42.53	12.93	91.83	83.94	193.16	11.42	14.42	91.41	43.46	144.3	138.25	220.78	9.49	27.46	95.81	62.62	82.19	78.68	181.62	10.22	15.64	95.73	43.32
104.73	101.43	210.66	12.04	19.95	96.85	48.15	47.93	21.16	84.85	6.9	41.75	44.14	24.93	87.25	51.8	136.91	5.04	45.67	59.37	37.83	134.69	102.98	189.89	7.23	37.14	76.46	54.23
122.32	114.82	204.65	10.91	23.66	93.88	56.11	75.22	65.2	122.68	14.14	47.12	86.68	53.15	72.85	68.17	181.63	9.41	16.94	93.58	37.53	70.21	36.37	144.02	12.45	21.19	51.81	25.26
25.4	10.01	64.39	6.68	32.06	39.41	15.54	61.21	51.13	146.19	7.87	22.72	83.54	34.97	146.39	141.47	185.8	8.02	27.4	96.64	76.14	134.37	128.33	217.1	10.24	22.7	95.5	59.11
							123.74	116.41	181.82	9.19	20.94	94.07	64.02	130.72	122.55	203.89	9.63	26.05	93.75	60.1	130.89	125.1	263.51	9.05	29.57	95.57	47.47
							127.32	120.96	243.17	11.3	22.44	95.01	49.74	141.92	138.6	172.68	6.22	27.14	97.66	80.26	89.7	85.59	238.89	10.34	16.9	95.42	35.83
							131.49	128.2	221.96	13.69	29.21	97.5	57.76	81.9	56.59	134.89	8.08	25.52	69.1	41.95	54.78	29.42	225.88	12.96	58.45	53.71	13.03
							57.22	20.51	113.32	6.74	28.16	35.84	18.1	37.37	17.93	75.25	7.55	34.09	47.98	23.83	140.39	135.57	202.89	11.29	28.38	96.57	66.82
							99.12	95.69	214.37	7.69	27.83	96.54	44.64	101.52	93.55	138.13	5.33	39.37	92.16	67.73	141.67	140.15	234.52	10.1	38.72	98.93	59.76
							150.59	142.37	197.97	9.6	34.09	94.54	71.92	133.91	128.09	196.73	10.29	30.6	95.65	65.11	146.73	142.47	242.4	10.27	32.64	97.1	58.78
							54.26	52.21	93.69	4.2	54.34	96.23	55.73	54.37	17.18	210.7	11.27	61.25	31.6	8.16	90.1	84.08	181.58	9.43	15.13	93.32	46.31
							134.95	127.66	208.69	14.51	24.76	94.6	61.17	89.3	80.4	133.85	5.21	44.02	90.03	60.07	92.77	81.65	174.33	9.08	15.86	88.01	46.83
							103.79	99.29	188.21	9.44	18.32	95.67	52.76	114.76	111.32	218.12	12.4	31.79	97	51.04	40.54	15.38	160.54	11.63	65.28	37.94	9.58
							133.17	125.23	208.26	9.2	23.66	94.04	60.13	68.88	60.59	180.04	8.82	15.64	87.97	33.66	43.57	9.63	102.15	11.29	15.13	22.11	9.43
							137.55	129.44	230.55	8.73	26.44	94.1	56.14	55.91	31.44	218.08	10.43	54.4	56.23	14.42	118.09	114.14	220.71	9.33	24.52	96.65	51.71
							94.14	86.41	188.57	10.59	14.28	91.79	45.83	48.92	11.01	150.97	14.36	58.02	22.5	7.29
							117.63	104.39	210.45	10.94	23.66	88.74	49.6	70.45	64.08	248.4	19.39	28.49	90.95	25.8
							50.23	45.04	76.13	3.15	48.15	89.68	59.17	72.49	63.83	136.94	6.16	47.46	88.05	46.61
							131.03	126.9	208.77	7.41	29.92	96.85	60.78	148.74	142.3	256.73	9.96	33.96	95.67	55.43
							98.67	89.5	226.78	9.78	23.8	90.71	39.47	95.73	89.29	189.65	20.41	15.64	93.28	47.08
							153.86	149.99	228.58	7.45	35.76	97.48	65.62	25.22	14.57	61.73	13.19	57.12	57.8	23.61
							121.55	112.1	216.92	12.12	23.94	92.22	51.68	118.16	103.63	214.14	10.99	18.52	87.7	48.39
							143.64	138.67	241.41	8.16	27.83	96.54	57.44	57.89	20.89	144	8.36	46.3	36.09	14.51
							136.01	132.14	263.69	10.27	26.4	97.15	50.11	75.05	71.81	151.31	10.22	16.38	95.68	47.46
							83.12	68.94	114.2	3.36	41.58	82.94	60.36	127.03	119.12	240.79	8.59	27.56	93.77	49.47
							70.66	57.36	193.35	11.29	16.32	81.17	29.67	88.16	82.91	128.38	6.25	41.05	94.06	64.59
							43.75	14.24	67.38	4.61	61.2	32.55	21.14	77.44	70.37	121.69	5.19	48.28	90.87	57.82
							97.75	95.4	129.53	4.19	39.89	97.6	73.65	32.1	11.43	87.54	7.74	54.4	35.6	13.06
							135.42	129.36	245.02	12.26	21.32	95.52	52.8	118.51	113.27	222.34	10.12	20.4	95.58	50.95
							61.01	40.7	186.75	9.36	35.62	66.71	21.8	118.97	105.49	202.68	15.97	21.76	88.66	52.05
							162.53	155.94	214.24	8.66	36.18	95.95	72.79	76.45	15.44	140.09	9.92	59.84	20.19	11.02
							64.38	62.42	130.54	5.78	25.74	96.96	47.82	132.51	129.09	218.45	9.49	24.48	97.42	59.1
							125.2	118.54	204.33	9.97	24.48	94.68	58.01	137.19	132.88	205.4	11.1	27.88	96.86	64.69
							59.34	28.56	147.46	12.96	26.52	48.14	19.37	101.22	88.02	147.77	6.99	30.65	86.96	59.57
							123.23	118.71	215.82	8.29	23.8	96.33	55	76.53	75.36	132.27	16.32	27.2	98.47	56.97
							123.84	107.09	229.16	10.57	22.88	86.48	46.73	118.75	115.92	241.75	7.72	22.58	97.61	47.95
							78.35	71.34	172.33	11.33	14.28	91.05	41.4	134.12	126.36	243.98	9.6	26.05	94.21	51.79
							97.32	91.48	186.92	10.86	17.68	94	48.94	100.03	97.92	227.71	10.53	25.64	97.89	43
							113.63	102	220.53	9.56	20.42	89.76	46.25	64.74	46.56	216.05	10.74	39.89	71.91	21.55
							53.2	11.27	130.01	19.27	49.87	21.18	8.67	121.55	114.24	192.67	9.84	26.59	93.98	59.29
							108.71	101.8	176.18	9.25	15.17	93.64	57.78
							155.27	152.83	243.3	10.89	38.47	98.43	62.81
							20.61	8.14	49.24	3.78	61.2	39.49	16.53

## Sheet: 60 min incubation
VAP-Ct	VSL-Ct	VCL-Ct	ALH-Ct	BCF-Ct	STR-Ct	LIN-Ct	VAP-EH1	VSL-EH1	VCL-EH1	ALH-EH1	BCF-EH1	STR-EH1	LIN-EH1	VAP-EH2.5	VSL-EH2.5	VCL-EH2.5	ALH-EH2.5	BCF-EH2.5	STR-EH2.5	LIN-EH2.5	VAP-EH5	VSL-EH5	VCL-EH5	ALH-EH5	BCF-EH5	STR-EH5	LIN-EH5
55.22	3.47	82.57	4.29	66.74	6.28	4.2	22.01	8.25	64.56	8.23	33.4	37.48	12.78	83.05	81.06	150.2	9.65	23.39	97.6	53.97	73.69	69.19	166.46	9.24	23.23	93.9	41.56
67.79	64.66	227.63	11.89	14.96	95.38	28.4	78.88	77.03	173.96	10.14	20.63	97.66	44.28	25.27	4.61	54.5	4.44	78.92	18.25	8.46	38.12	3.01	80.67	8.58	50.21	7.9	3.73
52.9	20.57	160.74	14.53	47.17	38.88	12.8	63.82	56.79	102.71	15.31	48.83	88.99	55.29	43.13	11.68	69.2	6.12	21.76	27.07	16.87	57.18	43.64	184.1	11.64	42.94	76.32	23.7
82.18	66.28	215.12	26.77	35.36	80.65	30.81	97.02	94.53	235.35	12.33	27.83	97.43	40.16	84.87	79.44	187.84	15.75	33.7	93.6	42.29	34.3	22.78	99.86	5.5	30.61	66.41	22.81
77	75.98	215.44	8.73	21.08	98.68	35.27	25.74	9.15	77.74	7	29.92	35.53	11.77	60.11	57.16	170.03	10.78	27.14	95.09	33.62	29.47	5.71	93.87	19.19	73.65	19.38	6.09
77.39	75.04	185.98	7.41	31.31	96.96	40.35	103.22	100.54	206.02	8.77	26.82	97.4	48.8	60.55	43.8	189.73	8.97	32.74	72.33	23.09	102.8	98.36	154.53	17.64	18.09	95.68	63.65
90.5	86.01	190.24	10.95	16.32	95.03	45.21	66.31	47.96	157.16	19.07	48.15	72.33	30.52	92.68	90.61	150.66	7.77	21.68	97.77	60.14	26.64	12.63	95.52	9.4	52.07	47.39	13.22
49.39	38.97	134.93	9.21	24.79	78.89	28.88	33.27	10.35	128.5	14.06	56.88	31.11	8.05	99.43	97.67	156.95	9.35	25.45	98.23	62.23	59.58	39.44	113.39	16.31	65.82	66.19	34.78
17.09	12.88	67.68	5.27	18.57	75.37	19.03	73.58	50.49	237.22	24.6	40.61	68.61	21.28	26.21	9.85	87.64	24.58	51.18	37.6	11.24	60.35	57.12	127.11	9.65	28.2	94.65	44.94
42.47	0.78	123.79	22.82	86.32	1.85	0.63	58.09	42.71	208.37	10.84	43.52	73.53	20.5	60.23	41.38	258.01	8.99	65.34	68.7	16.04	37.9	8.37	103.18	7.68	43.22	22.09	8.12
66.06	64.53	198.55	9.87	19.04	97.7	32.5	29.6	0.91	137.99	18.46	174.91	3.06	0.66	24.68	3.41	62.05	5.49	64.95	13.8	5.49	57.53	7.3	96.87	7.64	52.03	12.68	7.53
78.51	76.17	209.66	9.48	16.9	97.01	36.33	32.52	0.84	59.21	17.5	261.89	2.57	1.41	89.83	88.98	125.88	8.24	22.62	99.05	70.69	54.75	52.55	123.76	8.44	15.49	95.97	42.46
91.18	87.01	181.79	9.1	21.08	95.42	47.86	94.06	91.44	130.13	7.41	22.7	97.21	70.27	58.8	54.2	174.97	9.9	17.51	92.19	30.98	117.36	115.83	191.85	8.24	27.88	98.69	60.37
81.01	77.29	187.22	9.69	22.35	95.41	41.28	63.65	58.26	148.35	11.63	17.85	91.54	39.27	111.49	107.58	182.26	8.17	28.84	96.49	59.02	14.93	5.25	51.37	4.43	68.98	35.16	10.22
109.54	99.77	159.97	11	18.09	91.08	62.37	94.82	81.76	213.68	11.3	34.68	86.22	38.26	45.28	40.86	144.09	11.91	23.07	90.25	28.36	124.13	122.62	246.2	8.2	35.08	98.78	49.81
28.7	12.84	75.71	5.25	43.04	44.74	16.96	47.31	11.1	109.69	9.55	76.16	23.47	10.12	81.04	76.37	179.19	10.66	38.96	94.23	42.62	95.24	91.96	248.87	12.71	27.46	96.57	36.95
87.6	83.82	234.31	11.13	35.49	95.68	35.77	51.99	22.63	215.14	11.4	59.84	43.52	10.52	30.56	7.99	113.01	15.53	74.41	26.15	7.07	56.92	47.34	171.3	10.24	39.44	83.17	27.63
94.33	92.72	155.69	11.41	23.12	98.29	59.55	71.76	51.81	205.34	11.67	38.27	72.19	25.23	116.89	115.53	186.05	11.95	27.83	98.84	62.09	108.49	104.11	306.39	14.72	26.14	95.96	33.98
17.32	8.67	54.57	3.29	62.83	50.07	15.89	95.94	27.43	196.39	15.75	68.05	28.59	13.96	85.9	81.06	191.99	12.41	20.4	94.36	42.22	52.1	30.28	134.24	6.76	50.9	58.11	22.55
102.75	99.1	206.13	10.55	29.92	96.44	48.07	82.35	79.93	206.23	14.6	22.53	97.06	38.76	56.32	31.86	154.75	9.32	51.42	56.56	20.59	102.44	51.53	179.59	12.96	39.44	50.3	28.69
119.94	116.28	245.12	9.96	21.76	96.95	47.44	85.13	81.94	189.9	8.16	28.53	96.24	43.15	100.2	98.62	189.31	12.68	31	98.42	52.09	94.35	79.6	176.48	9.34	25.45	84.37	45.1
82.07	74.62	217.82	24.83	22.08	90.93	34.26	46.71	24.15	137.58	9.42	25.52	51.7	17.55	92.77	89.79	164.16	8.85	27.2	96.79	54.7	123.28	119.1	221.02	7.81	29.92	96.61	53.89
35.79	6.02	61.35	5.25	46.27	16.82	9.81	15.74	0	55.66	25.07	364.53	0	0	95.23	90.23	214.78	8.79	25.05	94.75	42.01	129.06	126.74	226.82	8.18	35.36	98.2	55.88
123.15	120.3	158.56	9.12	25.54	97.69	75.87	104.62	102.52	163.06	10.13	22.44	97.99	62.87	101.14	96.68	242.61	10.32	28.56	95.6	39.85	63.8	59.77	208.97	12.65	16.32	93.69	28.6
117.45	79.82	229.42	21.62	20.66	67.95	34.79	96.98	94.05	191.71	8.79	23.78	96.99	49.06	35.31	3.55	75.39	17.04	72.91	10.06	4.71	99.52	96.99	195.98	8.92	22.44	97.46	49.49
93.3	90.57	136.21	6.36	26.93	97.07	66.49	5.84	3.01	22.79	1.5	84.32	51.46	13.2	75.17	60.35	194.07	22.07	28.42	80.28	31.1	107.22	105.45	143	5.39	39.44	98.34	73.74
54.48	20.35	144.79	9.38	46.77	37.36	14.06	76.4	9.75	246.14	22.29	46.08	12.76	3.96	77.3	67.32	145.33	9.36	39.66	87.09	46.32	108.34	100.85	233.86	12.27	30.69	93.08	43.12
108.1	105.28	169.47	10.41	21.76	97.39	62.13	66.29	10.03	164.67	16.69	67.58	15.13	6.09	109.21	94.71	291.84	16.48	26.14	86.72	32.45	86.22	82.86	142.41	13.78	28.78	96.1	58.18
58.88	5.79	138.8	13.6	110.16	9.84	4.17	73.64	56.97	187.25	10.09	32.99	77.37	30.43	47.4	14.71	180.47	11.03	61.65	31.04	8.15	29.69	10.97	78.82	10.08	25.16	36.95	13.92
60.8	15.09	129.36	14.14	50.32	24.82	11.67	86.61	76.46	210.47	10.41	30.44	88.28	36.33	121.17	119.43	162.88	9.27	22.7	98.56	73.32	39.35	35.83	128.96	9.61	33.79	91.05	27.78
87.16	83.93	197.35	12.06	19.04	96.29	42.53	24.38	6.22	67.6	5.62	46.93	25.5	9.2	112.02	108.72	179.6	9.61	26.14	97.05	60.53	24.78	11.61	73.56	4.48	73.59	46.86	15.78
71.02	64.81	190.47	12.51	27.78	91.26	34.03	43.54	23.31	92.92	6.06	36.04	53.53	25.08	100.84	93.6	184.64	25.79	27.07	92.82	50.69	97.31	93.67	237.71	9.5	28.2	96.27	39.41
81.59	78.36	165.39	11.04	20.24	96.05	47.38	97.64	95.81	192.37	9.25	28.49	98.13	49.8	26.64	5.56	47.38	4.04	42.54	20.86	11.73	64.76	57.19	174.92	7.66	29.15	88.31	32.69
71.59	59.99	203.59	9.97	29.22	83.8	29.47	41.87	19.81	96.93	8.45	27.88	47.33	20.44	114.14	109.68	177.89	16.98	28.56	96.09	61.66	70.69	53.27	125.32	5.21	40.94	75.37	42.51
51.83	32.23	118.1	12.77	13.09	62.19	27.29	100.47	90.85	233.86	11.9	26.82	90.43	38.85	19.41	4.96	50.61	4.41	65.59	25.54	9.79	22.25	17.89	54.35	1.97	42.16	80.4	32.91
121.91	119	154.79	10.33	26.14	97.61	76.87	88.86	85.48	146.02	9.45	15.49	96.19	58.54	127.37	125.54	192.81	10.93	28.2	98.57	65.11	115.16	113.75	238.23	7.01	43.08	98.78	47.75
28.33	21.57	95.03	6.23	28.89	76.14	22.7	87.57	74.24	213.1	15.79	22.9	84.77	34.84	116.39	113.36	180.78	8.1	27.51	97.4	62.71	107.64	74.03	200.32	21.09	29.22	68.77	36.95
66.44	64.45	130.35	9.33	25.16	97.02	49.45	89.75	73.98	220.94	10.24	38.52	82.43	33.48	103.5	102.33	147.67	10.22	29.22	98.86	69.29	52.87	45.13	202.6	11.77	26.52	85.38	22.28
108.1	103.23	264.75	11.22	24.34	95.5	38.99	112.85	107.43	190.39	30.95	29.92	95.2	56.43	125.87	123.93	162.11	9.74	26.05	98.46	76.44	116.84	97.41	200.92	17.97	31.96	83.37	48.48
76.75	66.43	162.91	9.95	33.32	86.56	40.78	90.67	88.43	175.98	10.53	21.32	97.54	50.25	10.8	7.33	32.66	5.82	60.55	67.86	22.44	41.51	24	115.73	7.11	37.4	57.81	20.74
115.76	112.91	171.26	10.12	25.98	97.54	65.93	132	129.81	219.35	11.21	34.39	98.34	59.18	76.51	74.6	242.91	10.55	26.27	97.5	30.71	106.37	103.11	250.62	11.3	26.14	96.94	41.14
126.09	123.41	161.41	6.4	28.53	97.87	76.46	96.47	93.97	180.42	8.55	18.57	97.4	52.08	84.51	66.05	182.34	17.12	39.24	78.15	36.22	33.9	15.16	79.73	9.37	116.09	44.71	19.01
72.03	63.96	165.68	8.04	26.29	88.8	38.61	120.55	113.59	194.97	8.77	25	94.23	58.26	112.62	110.65	172.32	12.95	28.53	98.25	64.21	72.95	66.6	94	3.9	44.71	91.29	70.85
111.18	106.96	163.27	9.27	24.64	96.21	65.51	110.78	107.26	158.58	7.29	26.59	96.82	67.63	103.26	100.46	171.26	10	25.05	97.28	58.66	123.62	118.61	222.94	9.65	26.52	95.95	53.2
40.2	25.41	62.55	10.99	86.66	63.21	40.63	125.36	121.15	267.96	7.89	32.11	96.64	45.21	47.59	16.32	129.42	12.34	42.74	34.3	12.61	66.4	64.32	184.52	8.08	23.12	96.87	34.86
54.61	43.47	99.38	6.98	29.24	79.59	43.74	89.92	86.92	190.11	10.51	26.82	96.66	45.72	60.18	38.66	106.59	10.91	168.64	64.24	36.27	28.33	14	81.51	8.09	84.22	49.44	17.18
84.52	77.82	122.52	4.15	46.67	92.07	63.51	50.48	19.33	157.35	9.87	72.08	38.3	12.29	98.35	96.36	175.55	8.86	29.24	97.97	54.89	34.73	15.39	72.52	15.14	42.64	44.3	21.22
101.6	75.73	158.31	6.66	39.44	74.54	47.84	72.95	59.07	251.94	9.74	51.68	80.97	23.45	130.28	129.15	180.48	8.96	23.8	99.13	71.56	115.25	111.13	218.62	7.53	29.92	96.42	50.83
102.69	97.92	212.99	11.12	24.35	95.35	45.97	70.49	56.6	228.49	10.58	23.23	80.29	24.77	112.57	110.9	200.03	10.3	26.82	98.52	55.44	81.14	78.51	169.91	8.12	24.15	96.77	46.21
28.2	24.18	65.82	4.31	46.77	85.76	36.73	108.39	107.3	216.85	10.67	32.33	99	49.48	123.92	121.54	220.26	6.54	28.53	98.07	55.18	114.08	111.37	172.12	11.8	25.74	97.63	64.71
53.53	8.08	189.63	19.12	116.41	15.09	4.26	61.5	9.61	140.04	9.66	31.54	15.63	6.86	78.76	60.56	231.14	28.42	31.34	76.9	26.2	127.56	125.97	167.7	6.62	30.83	98.75	75.12
125.93	122.57	178.65	9.59	24.64	97.33	68.61	73.89	68.96	182.57	10.35	31.85	93.32	37.77	128.19	126.01	192.04	10.73	27.81	98.3	65.62	140.5	138.1	182.21	8.55	26.52	98.3	75.79
27.44	10.68	60.81	7.33	19.66	38.9	17.55	69.05	60.96	103.64	3.75	37.4	88.28	58.82	130.52	122.97	207.06	22.99	28.86	94.22	59.39	56.16	15.04	130.35	16.95	51.39	26.78	11.54
120.07	114.67	151.25	8.95	27.51	95.5	75.81	36.36	16.2	91.12	8.3	76.16	44.55	17.77	88.9	86.39	224.98	10.73	27.88	97.18	38.4	109.26	106.8	157.86	9.02	26.14	97.75	67.66
39.73	21.49	100.82	20.28	109.36	54.09	21.32	115.24	111.45	201.62	10.77	31.64	96.71	55.28	55.26	49.95	89.27	5.86	51.19	90.38	55.95	50.78	33.07	134.81	7.93	34.68	65.13	24.53
103.76	93.36	220.88	14.17	40.36	89.97	42.27	74.33	46.89	222.54	11.85	34.64	63.09	21.07	83.93	81.31	166.88	7.62	21.76	96.88	48.72	96.19	89.93	180.74	9.74	17.3	93.49	49.76
86.71	83.74	159.89	9.42	17.23	96.58	52.38	116.43	114.82	162.94	10.88	28.53	98.62	70.47	96.36	91.75	152.62	9.84	24.11	95.21	60.12	106.63	103.13	205.58	12.59	22.44	96.72	50.17
35.65	18.17	101.61	7.58	41.96	50.98	17.89	35.72	11.11	106.89	7.21	41	31.1	10.39	103.94	99.98	222.25	9.5	25.05	96.2	44.99	31.86	12.06	84.74	8.96	43.63	37.85	14.23
96.17	93.47	134.51	9.16	16.7	97.19	69.49	77.27	75.03	138.66	9.29	22.16	97.1	54.11	45.72	29.6	101.63	17.28	70.16	64.75	29.13	124.87	122.68	214.42	8.71	30.6	98.25	57.21
126.08	121.55	190.16	9.89	24.22	96.41	63.92	69.28	26.58	262.04	15.04	69.46	38.37	10.14	17.02	6.55	59.53	7.58	62.59	38.47	11	65.33	57.71	191.7	9.99	45.92	88.34	30.11
110.34	107.1	232.59	11.64	19.45	97.07	46.05	46.37	10.24	151.85	11.53	57.62	22.08	6.74	9.05	4.27	35.93	2.28	75.28	47.22	11.89	64.29	61.7	222.44	9.74	19.95	95.97	27.74
21.93	5.19	76.63	11.42	207.71	23.69	6.78	45.6	14.06	187.17	19.85	144.44	30.83	7.51	94.4	90.74	179.64	9.58	22.01	96.12	50.51	90.73	44.14	176.21	11.32	39.52	48.65	25.05
43.73	39.28	83.56	4.77	33.32	89.82	47.01	40.85	8.31	94.34	9.35	50.21	20.34	8.81	104.38	103.36	130.79	8.54	21.89	99.02	79.03	34.49	10.71	72.67	5.54	34.57	31.04	14.73
24.85	7.87	60.59	3.9	61.9	31.69	13	119.68	118.23	148.66	8.22	22.27	98.79	79.53	27.8	14	85.04	5.98	33.66	50.36	16.46	105.21	102.94	202.89	11.39	27.83	97.85	50.74
37.75	8.33	99.61	9.68	59.84	22.08	8.37	124.55	123.34	169.27	9.44	37.83	99.03	72.86	55.49	22.38	120.28	9.21	47.43	40.33	18.61	120.77	115.22	233.67	8.65	25.45	95.4	49.31
109.19	107.03	207.45	8.66	25.16	98.02	51.59	108.94	105.5	234.15	10.47	27.14	96.84	45.06	33.49	11.11	67.3	9.07	35.75	33.18	16.51	23.8	16.09	64.51	5.31	55.08	67.6	24.94
75.14	54.59	118.71	6.38	44.71	72.65	45.98	74.49	71.69	198.63	10.68	28.53	96.23	36.09	116.31	115.13	144.91	7.32	25.16	98.99	79.45	105.08	101.11	229.98	11.49	42.64	96.22	43.96
53.4	45.79	187.84	11.2	26.14	85.76	24.38	87.37	84.74	208.15	9.52	19.72	97	40.71	89.69	59.11	176.89	24.23	22.44	65.91	33.42	36.79	14.65	99.24	8.12	24.07	39.82	14.76
92.45	89.07	215.62	10.32	22.44	96.35	41.31	105.73	103.82	173.66	8.65	28.69	98.19	59.78	120.71	113.75	157.86	7.77	29.21	94.23	72.06	115.2	109.93	203.2	7.6	28.56	95.43	54.1
108.71	104.29	236.4	11.94	25.97	95.93	44.12	122.49	120.48	232.6	8.42	31.28	98.36	51.8	137.66	131.67	170.29	16.17	25.45	95.65	77.32	106.95	105.53	260.12	9.15	27.88	98.67	40.57
62.27	32	155.08	11.16	45.39	51.39	20.63	76.83	69.27	117.96	5.31	35.36	90.16	58.72	86.04	84.12	210.23	10.59	27.51	97.77	40.01	116.84	111.56	263.6	14.08	29.24	95.48	42.32
108.42	106.1	196.79	11.63	25.16	97.86	53.92	56.02	48.24	130.11	8.43	44.2	86.12	37.08	66.09	43.41	95.16	14.51	37.83	65.68	45.62	45.37	30.07	137.78	7.84	58.46	66.28	21.83
22.73	10.5	71.81	5.31	44.88	46.2	14.62	79.05	59	178.94	7.76	37.84	74.64	32.97	91.21	84.2	157.5	9.26	29.24	92.31	53.46	143.93	141.28	254.15	9.67	38.76	98.17	55.59
84.06	80.35	142.52	8.8	37.1	95.6	56.38	157.38	154.39	201.03	7.28	33.78	98.1	76.8	109.88	106.67	198.74	8.92	27.2	97.08	53.68	67.64	62.74	190.97	9.49	26.52	92.76	32.85
96.36	89.46	205.76	11.52	19.48	92.84	43.48	117.57	112.77	304.83	14.16	31.61	95.92	36.99	108.93	105.87	202.13	10.06	32.33	97.18	52.37	102.83	101.79	132.56	4.24	48.28	98.98	76.79
81.96	59.51	249.91	11.65	45.59	72.61	23.81	106.02	92.06	235.19	15.92	19.36	86.83	39.14	106.97	106.05	145.51	8.65	28.86	99.15	72.88	22.28	6.93	73.23	5.5	57.84	31.11	9.47
81.79	46.35	222.29	15.64	18.76	56.66	20.85	53.01	31.36	114.4	8	29.24	59.16	27.41	119.15	117.98	147.02	7.63	25.34	99.02	80.25	82.29	81.01	151.55	9.36	19.95	98.43	53.45
47.73	7.55	151.83	11.71	174.07	15.81	4.97	100.08	96.31	215.91	8.6	21.12	96.23	44.61	51.95	1.68	168.35	21.21	168.52	3.23	1	119.97	115.89	137.38	4.77	38.76	96.59	84.35
80.18	25.35	120.97	16.97	80.18	31.61	20.95	52.6	12.95	92.44	14.12	46.62	24.62	14.01	87.33	84.89	196.52	10.7	26.52	97.2	43.2	106.43	104.26	211.76	10.72	30.61	97.97	49.23
125.69	121.78	207.45	7.19	29.15	96.89	58.7	53.15	30.6	107.78	6.28	40.36	57.57	28.39	116.45	112.61	211.06	9.46	31.28	96.7	53.36	102.91	101.46	210.07	10.09	37.14	98.59	48.3
68.38	33.02	148.91	10.56	37.31	48.28	22.17	45.87	27.08	199.91	11.21	20.4	59.05	13.55	18.64	8.33	67.21	6.55	57.8	44.7	12.4	51.85	42.37	116.92	6.36	36.05	81.72	36.24
24.25	8.41	65.23	8.81	15.16	34.7	12.9	44.01	13.43	81.45	4.97	44.28	30.53	16.49	37.46	16.17	113.44	7.83	39.44	43.17	14.25	123.38	115.21	223.72	16.69	27.2	93.38	51.5
79.64	77.13	169.95	9.96	20.4	96.85	45.39	50.03	46.48	189.63	9.99	19.04	92.91	24.51	47.25	36.35	115.94	9.9	32.33	76.93	31.35	47.5	42.47	127.11	9.68	21.08	89.41	33.41
106.02	100.01	221.38	9.85	21.08	94.33	45.18	79.69	8.65	191.25	16.7	44.88	10.85	4.52	28.18	0.64	83.87	19.07	374.34	2.27	0.76	81.75	78.99	171.97	8.8	14.41	96.62	45.93
106.79	102.81	236.82	8.24	26.14	96.27	43.41	43.07	19.85	122.54	10.36	20.4	46.08	16.2	102.77	93.35	202.28	12.97	22.88	90.84	46.15	101.17	99.05	211.47	9.13	34.79	97.91	46.84
118.6	115.46	210.79	9.66	28.56	97.35	54.77	25.4	7.41	72.14	7.8	115	29.18	10.27	148.25	140.36	282.46	14.53	33.7	94.67	49.69	150.52	147.29	248.07	10.82	30.95	97.86	59.38
80.42	77.07	198.41	9.17	17.68	95.83	38.84	64.98	53.06	196.08	8.79	24.64	81.66	27.06	67.28	63.8	205.08	12.52	24.51	94.83	31.11	149.91	148	213.3	10.5	26.44	98.72	69.38
50	30.17	149.33	10.26	39.89	60.34	20.2	40.01	22.39	94.51	12.36	27.78	55.98	23.7	163.04	160.95	225.89	10.29	36.33	98.72	71.25	70.58	57.04	130.84	18.8	41.81	80.81	43.59
33.47	17.02	84.25	4.95	67.41	50.85	20.2	119.9	116.98	225.5	8.89	31.96	97.57	51.88	41.19	2.06	169.5	19.32	121.74	4.99	1.21	91.54	76.95	117.35	4.51	37.4	84.06	65.57
74.42	69.98	113.96	5.52	39.89	94.03	61.41	53.22	36.65	114.76	7.56	52.36	68.87	31.94	116.79	111.78	189.92	11.04	22.01	95.71	58.85	64.93	59.58	109.89	4.39	38.63	91.76	54.22
50.92	44.4	206.49	11.35	32.7	87.2	21.5	32.76	28.54	89.84	5.73	30.26	87.12	31.77	108.57	102.08	219.05	27.35	35.33	94.03	46.6	32.1	7.23	66.12	5.26	47.6	22.52	10.93
28.78	21.9	64.71	3.9	28.89	76.09	33.85	51.93	5.06	93.27	10.87	55.49	9.74	5.42	122.64	121.23	203.66	9.26	28.95	98.85	59.53	52.37	23.55	107.18	7.09	32.74	44.97	21.97
120.21	116.77	205.33	9.29	27.2	97.14	56.87	151.07	140.74	268.31	22.15	27.1	93.17	52.46	48.55	44.27	70.37	5.01	29.04	91.19	62.91	137.77	134.61	182.96	11.68	28.16	97.71	73.58
122.82	116.5	213.62	9.47	26.87	94.85	54.53	71.03	41.16	208.88	16.8	42.16	57.95	19.7	71.64	66.08	178.4	7.45	23.12	92.25	37.04	107.93	104.34	150.91	9.25	24.41	96.67	69.14
42.22	13.73	118.65	11.5	48.62	32.52	11.57	12.48	6	38.86	2.3	105.4	48.06	15.43	96.91	91.25	190.37	13.39	22.8	94.15	47.93	55.91	8.62	196.44	20.74	192.43	15.43	4.39
87.47	74.77	177.21	15.72	44.02	85.48	42.19	66.23	61.23	163.74	14.73	15.82	92.46	37.4	136.84	134.34	203.63	9.15	26.82	98.18	65.97	56.83	54.5	86.3	4.88	39.44	95.89	63.15
101.69	95.34	196.17	9.41	20.42	93.76	48.6	129.15	126.68	221.73	10.3	37.04	98.09	57.14	68.81	29.95	158.08	21.77	28.09	43.53	18.95	122.22	118.85	243.47	12.29	33.4	97.25	48.82
35.67	21.58	101.59	7.33	48.71	60.49	21.24	57.48	16.7	99.42	7.7	29.28	29.06	16.8	23.83	4.81	80.63	5.47	62.88	20.17	5.96	38.95	26.65	89.04	13.28	42.18	68.43	29.93
122.3	120.54	178.69	10.06	27.51	98.56	67.46	36.88	11.35	132.07	10.9	34.72	30.78	8.59	79.48	74.45	170.31	9.34	22.35	93.67	43.72	34.88	7.47	64.07	10.94	48.71	21.42	11.66
135.38	129.66	225.04	12.17	30.26	95.77	57.62	148.84	144.48	259.11	11.62	33.24	97.07	55.76	90	86.43	180.23	10.33	23.39	96.03	47.95	20.5	17.7	35.79	1.84	36.9	86.35	49.47
78.61	66.56	153.84	9.47	29.13	84.66	43.26	106.4	96.43	230.34	16.2	36.04	90.63	41.86	96.84	94.93	161.32	10.64	19.71	98.03	58.85	41.93	8.19	93.25	7.91	64.71	19.53	8.78
48.01	38.29	146.94	7.99	24.48	79.76	26.06	32.36	12.07	54.8	6.46	25.2	37.28	22.02	55.79	47.29	115.27	8.85	37.4	84.76	41.03	25.8	11.97	91.04	8.32	39.02	46.37	13.14
91.61	88	207.09	10.56	17.68	96.06	42.49	104.03	101.39	158.75	9.9	22.44	97.46	63.87	113.96	111.49	177.89	9.68	28.56	97.83	62.67	110.75	104.51	185	8.9	24.22	94.37	56.49
130.45	124.91	274.62	7.9	32.64	95.75	45.48	65.15	49.54	113.89	4.7	45.59	76.04	43.5	90.82	90.03	135.05	11.53	23.12	99.13	66.66	57.94	55.05	108.12	5.08	57.12	95.01	50.92
101.42	97.87	211.68	9.33	25.16	96.5	46.24	112.94	5.15	259.3	31.16	172.03	4.56	1.99	99.74	96.95	137.76	6.53	22.27	97.21	70.38	106.37	102.58	190.39	7.2	24.07	96.43	53.88
136.81	133.12	227.95	8.86	34.39	97.3	58.4	84.87	80.1	209.26	10.99	27.51	94.38	38.28	27.42	8.63	91.87	6.03	39.2	31.48	9.39	61.68	52.29	122.37	11.28	37.57	84.78	42.73
30.9	9.61	75.78	3.78	37.57	31.11	12.69	91.09	87.16	204.93	9.93	23.01	95.69	42.53	51.06	4.34	142.41	23.18	94.63	8.5	3.05	33.54	15.56	82.93	7.1	46.62	46.39	18.76
82.49	77.94	222.64	12.07	29.56	94.48	35.01	129.18	117.53	254.5	10.49	27.51	90.98	46.18	106.6	105.17	205.82	11.18	23.94	98.66	51.1	25.87	7.73	82.1	8.5	46.24	29.89	9.42
93.94	92.19	195.23	10.78	32.33	98.14	47.22	77.35	70.22	114.27	5.28	42.16	90.78	61.45	111.84	108.08	175.08	9.1	23.27	96.64	61.73	50.84	29.78	149.5	9.64	38.96	58.58	19.92
136.88	132.79	237.17	9.04	34.09	97.01	55.99	90.23	85.78	140.07	8.33	16.24	95.06	61.24	109.59	105.43	184.89	10.97	21.32	96.2	57.02	59.67	47.06	99.09	6.09	37.04	78.86	47.49
103.7	99.33	226.72	13.17	23.07	95.79	43.81	102.76	92.2	175.57	17.59	22.53	89.72	52.52	103.51	101.55	181.96	8.28	23.12	98.11	55.81	131.42	129.51	193.16	12.53	31.34	98.55	67.05
58.38	41.17	234.13	9.94	48.44	70.53	17.59	35.98	19.93	106.81	9.95	80.47	55.38	18.65	49.18	30.72	157.79	14.84	40.6	62.46	19.47	129.35	126.94	168.61	5.98	33.01	98.14	75.28
44.43	24.98	98.79	5.93	28.49	56.23	25.29	102.84	101.71	145.03	10.62	21.57	98.9	70.13	92.89	87.16	251.4	12.46	17	93.83	34.67	123.73	120.53	283.61	10.24	28.4	97.42	42.5
126.45	123.86	172.94	6	28.72	97.96	71.62	7.49	1.46	30.91	2.09	120.38	19.42	4.71	30.64	12.18	115.28	7.72	64.65	39.74	10.56	123.66	122.52	209.86	8.99	34.79	99.08	58.38
119.6	116.4	223.97	10.48	22.83	97.33	51.97	17.94	6.06	49.78	4.17	46.92	33.77	12.17	32.82	14.3	86.64	7.15	17.1	43.58	16.51	25.4	0.19	55.18	18.88	1219.2	0.75	0.35
104.24	102.3	207.03	8.86	24.48	98.15	49.42	123	121.84	174.49	10.54	31.31	99.06	69.83	66.19	59.94	148.15	11.14	18.52	90.56	40.46	39.48	5.54	76.79	6.1	87.72	14.04	7.22
130.61	117.06	223.27	13.93	31	89.63	52.43	115.27	114.31	152.74	8.09	26.44	99.17	74.84	118.45	112.94	164.12	7.83	21.76	95.34	68.81	130.68	128.21	256.86	7.89	29.92	98.11	49.91
97.79	95	188.29	8.24	26.14	97.14	50.45	81.76	78.39	170.54	9	15.96	95.88	45.97	66.68	59.02	155.15	10.31	19.71	88.52	38.04	90.3	79.83	265.96	24.61	36.04	88.41	30.02
97.47	92.27	233.1	18.26	19.71	94.66	39.58	24.56	4.39	57.83	4.15	61.43	17.87	7.59	43.62	7.63	100.74	8.08	68.19	17.48	7.57	94.8	91.77	228.69	8.52	27.83	96.81	40.13
48.94	35.4	187.42	8.93	40.6	72.33	18.89	54.68	28.29	128.57	7.05	35.08	51.73	22	60.87	36.43	144.3	18.06	59.84	59.84	25.24	75.42	65.34	227.46	10.78	22.8	86.63	28.72
82.12	73.68	238.72	10.72	21.08	89.72	30.86	88.16	85.09	228.89	12.34	16.51	96.51	37.17	110.56	109.08	185.8	8.95	24.93	98.67	58.71	28.91	22.96	90.46	5.3	57.09	79.41	25.38
112.85	108.75	240.83	7.87	29.92	96.36	45.15	61.77	48.98	107.76	5.18	38.77	79.28	45.45	17.94	9.25	54.03	3.28	40.17	51.58	17.12	172.34	169.55	275.41	11.09	36.45	98.38	61.56
39.37	18.51	93.73	9.95	36.42	47.01	19.75	77.22	64.61	97.74	3.69	34.39	83.67	66.1	120.91	96.06	300.22	11.4	36.18	79.45	32	18.75	6.71	44.73	2.37	51.49	35.79	15.01
114.13	110.02	206.48	9.38	24.07	96.4	53.29	116.66	114	197.8	18.52	23.39	97.72	57.63	100.15	93.3	190.76	12.37	18.57	93.16	48.91	86.93	79.34	172.93	11.44	27.88	91.26	45.88
146.49	140.74	268.85	10.13	33.79	96.07	52.35	71.35	69.11	175.71	9.64	26.93	96.86	39.33	14.63	2.07	53.92	16.28	99.97	14.13	3.83	21.69	17.64	61.47	3.39	48.15	81.32	28.69
118.53	113.85	208.76	10.04	28.42	96.05	54.54	31.73	10.41	65.58	4.92	42.05	32.8	15.87	63.62	58.24	152.58	7.61	33.79	91.54	38.17	61.82	36.24	134.12	11.47	39.15	58.62	27.02
114.21	109.97	190.37	12.88	17	96.29	57.77	75.55	62.42	106.78	5.65	46.24	82.62	58.45	83.08	79.34	121.03	9.97	39.2	95.49	65.55	120.19	117.63	176.27	13.45	32.45	97.87	66.74
43.45	23.31	110.02	11.23	60.52	53.65	21.19	126.62	109.72	211.42	16.58	30.26	86.66	51.9	93.86	92.12	139.63	5.42	27.88	98.15	65.97	101.59	98.5	148.83	9.28	30.6	96.96	66.18
66.59	46.91	209.7	10.69	36.72	70.44	22.37	19.87	7.38	72.11	7.31	53.7	37.16	10.24	62.19	30.83	150.12	7.94	36.04	49.59	20.54	53.68	26.88	172.08	10.2	49.52	50.06	15.62
113.12	105.08	196.2	10.76	19.71	92.89	53.56	76.47	69.28	153.89	10.2	12.67	90.61	45.02	52.01	27.06	141.53	9.05	43.27	52.03	19.12	80.39	62.52	151.94	9.02	116.96	77.77	41.15
111.04	106.03	220.51	9.71	25.74	95.49	48.09	38.71	15.15	109.4	7.1	41.96	39.13	13.85	94.19	89.31	184.47	9.22	18.52	94.82	48.42	74.63	66.15	113.43	4.94	52.27	88.63	58.31
101.2	98	185.96	8.69	20.87	96.84	52.7	77.33	50.42	217.21	23.36	25.16	65.2	23.21	37	8.42	68.85	5.54	32.64	22.76	12.23	68.55	67.23	123.97	9.51	26.05	98.07	54.23
97.67	95.41	258.76	9.84	29.57	97.68	36.87	129.63	126.42	234.08	20.49	29.92	97.52	54.01	119.45	115.78	256.92	9.62	31.31	96.92	45.06	128.24	125.09	229.42	8.43	38.76	97.54	54.53
44.84	29.99	117.83	10.46	26.52	66.88	25.45	48.97	40.3	152.56	7.98	31.75	82.3	26.42	88.45	64.7	205.93	18.69	27.83	73.15	31.42	92.73	74.33	261.62	18.72	50.34	80.16	28.41
47.33	19.98	112.59	9.99	52.63	42.21	17.74	56.17	22.47	182.43	10.3	33.4	40.01	12.32	107.79	103.35	248.77	9.41	34.39	95.88	41.54	124.4	120.27	241.04	7.07	32.01	96.68	49.9
90.19	85.29	204.64	9.32	19.71	94.57	41.68	104.58	93.29	176.65	11.58	26.51	89.2	52.81	108.51	105.39	173.8	7.84	27.2	97.13	60.64	97.22	87.1	165.42	10.27	44.71	89.59	52.65
105.14	103.02	218.19	10.81	23.94	97.98	47.21	95.77	94.24	134.57	9.58	20.25	98.4	70.03	60.74	55.98	95.14	3.64	45.56	92.17	58.84	28.61	14.6	95.7	5.72	58.24	51.03	15.26
131.06	125.09	219.97	7.46	31.31	95.44	56.87	29.64	2.27	144.7	9.88	180.21	7.66	1.57	49.07	36.42	129.94	9.62	41.48	74.21	28.03	45.12	29.14	89.22	4.84	62.56	64.58	32.66
83.22	78.97	157.73	7.09	19.1	94.89	50.06	116.41	112.82	193.35	10.27	28.2	96.92	58.35	112.98	106.29	238.02	9.93	25.34	94.08	44.66	86.43	84.85	147.19	10.64	25.74	98.17	57.65
22.52	11.5	55.06	4.3	35.33	51.06	20.88	20	6.53	80.68	4.27	27.51	32.67	8.1	92.47	87.38	255.15	9.33	32.01	94.49	34.25	39.69	27.74	143.91	10.77	43.65	69.89	19.27
118.99	113.99	228.46	7.26	27.88	95.8	49.9	114.04	111.24	181.98	11.19	25.98	97.55	61.13	59.52	0.35	137.84	23.86	123.37	0.58	0.25	38.07	5.01	157.68	18.33	103.17	13.16	3.18
110.16	106.89	204.23	8.22	22.7	97.03	52.34	122.81	120.2	240.27	11.95	27.56	97.88	50.03	52.06	43.89	173.83	11.01	29.58	84.3	25.25	48.08	8.95	162.69	14.39	168.38	18.61	5.5
46.27	10.91	86.88	7.18	59.16	23.58	12.56	75.28	73.07	103.34	3.28	44.88	97.07	70.71	81.52	73.87	156.81	8.85	40.8	90.61	47.11	53.87	9.96	155.44	16.76	123.2	18.5	6.41
113.64	108.37	262.07	9.39	29.58	95.36	41.35	51.37	46.37	85.88	4.65	37.4	90.26	53.99	105.57	103.49	201.29	8.57	24.07	98.03	51.41	131.4	129.44	235.29	12.72	27.2	98.51	55.01
64.24	55.39	125.58	5.91	50.69	86.23	44.11	84.96	79.15	122.53	7.66	24.19	93.16	64.6	125.39	123.59	245.77	9.62	37.57	98.56	50.29	32.78	26.79	99.15	7.65	25.54	81.72	27.02
134.19	130.39	240.24	9.52	31.68	97.16	54.28	112.57	109.17	266.12	10.56	28.56	96.98	41.02	24.74	19.95	70.96	2.64	44.35	80.63	28.11	49.31	12.66	127.26	9.78	48.96	25.67	9.94
47.12	23.11	150.97	9.68	48.01	49.04	15.31	120.98	118.5	156.48	7.02	25.64	97.95	75.73	104.83	102.12	159.5	10.68	26.52	97.41	64.02	66.27	53.22	115.13	3.59	52.27	80.3	46.23
71.21	68.24	175.8	11.07	14.96	95.82	38.82	83.37	70.36	136.2	8.09	30.26	84.4	51.66	52.15	26.68	118.46	9.19	46.08	51.16	22.52	50.03	19.24	78.31	15.21	48.96	38.45	24.57
71.51	69.61	157.18	7.24	16.32	97.35	44.29	89.03	77.36	172.4	21.03	31.64	86.9	44.87	92.75	91.36	167.75	6.08	27.83	98.51	54.47	56.84	44.55	186.98	10	39.44	78.37	23.82
110.41	107.53	182.4	8.34	25.64	97.39	58.95	37.71	31.36	76.2	4.05	45.39	83.16	41.16	79.01	76.29	208.28	8.86	23.12	96.56	36.63	55.11	52.18	111.28	7.34	39.66	94.68	46.89
98.61	93.02	223.13	9.5	32.01	94.33	41.69	85.31	78.16	207.73	25.3	22.7	91.62	37.62	132.59	128.55	207.52	11.96	31.77	96.95	61.94	132.35	130.27	163.95	9.22	27.51	98.43	79.46
46.52	14.93	91.04	11.46	45.63	32.09	16.4	26.56	22.77	65.68	3.82	41.36	85.72	34.66	143.68	137.95	264.35	9.75	37.14	96.01	52.18	52.75	47.96	98.42	11.07	1056.29	90.93	48.74
34.36	14.52	77.15	6.09	38.96	42.25	18.82	117.25	111.35	188.1	16.15	27.14	94.97	59.2	112.31	109.09	241	9.64	39.66	97.14	45.27	44.17	34.17	84.5	9.92	25.74	77.35	40.44
38.91	8.39	96.2	5.98	48.57	21.56	8.72	108.18	103.45	198.35	14.35	23.23	95.63	52.15	70.2	17.68	135.91	16.04	75.66	25.18	13.01	62.38	59.38	177.81	12.24	23.66	95.19	33.39
101.37	99.93	137.18	8.19	25.45	98.58	72.84	81.58	77.93	166.55	15.15	19.26	95.53	46.79	71.58	70.39	172.76	10.17	34.79	98.33	40.74	135.42	89.3	265.46	16	50.71	65.94	33.64
104.32	40.73	215.86	9.96	26.44	39.05	18.87	21.19	2.77	44.79	3.87	41.2	13.08	6.19	123.14	120.65	209.14	8.85	35.2	97.98	57.69	51.3	42.57	110.64	6.79	35.36	82.97	38.47
29.49	11.84	125.88	7.29	55.08	40.15	9.41	35.08	25.48	79.18	13.11	42.84	72.62	32.17	23.02	10.26	51.78	3.4	25.86	44.57	19.82	55.03	24.87	110.16	7.8	35.08	45.18	22.57
34.4	22.79	101.68	10.14	31.96	66.23	22.41	111.77	109.61	169.86	8.94	23.12	98.07	64.53	119.85	115.89	230.9	10.64	29.22	96.7	50.19	42.62	0.63	89.2	11.03	57.31	1.47	0.7
47.73	16.82	159.9	11.07	72.76	35.25	10.52	91.93	88.97	150.61	8.96	35.36	96.77	59.07	140.1	132.41	199.72	7	36.45	94.51	66.3	50.36	12.56	80.28	4.11	49.98	24.95	15.65
82.11	77.35	104.55	3.9	38.08	94.2	73.98	35.51	9.29	71.72	6.3	65.35	26.17	12.96	22.35	0.1	103.11	20.46	168.64	0.45	0.1	96.51	92.41	249.4	11.09	21.12	95.75	37.05
81	76.7	199	8.11	20.66	94.7	38.54	75.92	72.73	124.16	8.29	15.82	95.79	58.58	86.41	71.18	187.65	20.96	22.44	82.38	37.93	136.77	129.43	283.62	9.9	28.2	94.63	45.63
75.12	65.83	154.64	10.29	38.63	87.64	42.57	26.13	9.83	78.11	17.01	312.79	37.6	12.58	43.56	5.52	135.83	15.03	63.03	12.68	4.07	48.35	43.72	80.46	3.45	43.33	90.43	54.34
83.85	78.86	245.34	12.85	16.32	94.06	32.14	62.33	53.06	173.51	8.67	19.21	85.12	30.58	84.95	82.75	127.59	6.53	32.22	97.41	64.86	17.07	8.25	68.84	6.04	102.48	48.34	11.98
79.81	63.33	221.39	9.77	37.83	79.35	28.61	57.91	53.21	168.75	11.83	39.66	91.89	31.53	44.23	33.97	107.15	6.15	42.16	76.81	31.71	51.6	46.41	112.22	10.56	51.58	89.95	41.36
24.3	13.93	65.94	6.38	56.4	57.32	21.12	77.87	31.16	216.04	20.28	43.88	40.02	14.43	119.38	117.39	264.57	7.4	35.74	98.34	44.37	39.19	7.78	165.02	9.52	52.54	19.84	4.71
45.1	42.45	81.94	3.88	40.12	94.12	51.81	32.63	3.56	61.66	4.25	43.83	10.92	5.78	66.92	38.46	155.61	17.88	61.23	57.48	24.72	44.68	12.61	112.88	7.05	65.82	28.21	11.17
98.35	95.83	220.73	8.13	23.8	97.44	43.41	93.9	91.62	145.61	9.57	17.19	97.57	62.92	55.98	39.87	165.9	10.03	44.05	71.22	24.03	35.1	16.94	113.79	11.95	22.08	48.26	14.89
27.41	6.88	90.54	20.28	38.66	25.11	7.6	79.42	42.28	212.48	12.45	39.44	53.23	19.9	38.85	22.35	119.59	9.07	14.73	57.51	18.68	99.06	96.51	208.9	12.66	29.24	97.43	46.2
52.92	29.81	206.6	11.54	44.71	56.34	14.43	60.33	30.48	128.53	12.57	25.16	50.53	23.72	30.71	24.6	46.47	2.47	34.39	80.1	52.93	118.68	116.2	238.6	7.85	27.88	97.91	48.7
115.64	110.69	236.2	16.88	23.8	95.72	46.86	63.36	42.7	192.44	13.08	23.12	67.4	22.19	76.89	73.75	157.33	9.97	12.52	95.91	46.88	84.63	79.5	146.41	12.24	33.01	93.95	54.3
89.04	82.07	207.49	12	20.19	92.17	39.55	107.36	105.53	210.44	8.3	27.88	98.3	50.15	105.24	96.28	165.25	10.03	25.84	91.49	58.26	20.93	0.87	98.04	27.08	120.85	4.18	0.89
26.47	12.28	82.45	5.96	41.96	46.37	14.89	116.14	113.45	214.15	10.44	22.44	97.68	52.98	132.15	83.46	250.63	26.91	35	63.16	33.3	60.23	47.85	94.73	8.16	54.34	79.45	50.52
51.79	28.37	124.73	9.75	30.61	54.79	22.75	93.77	14.56	315.45	27.84	67.45	15.53	4.62	49.28	44.21	84.85	3.77	43.83	89.71	52.1	95.17	91.95	184.07	9.8	22.44	96.61	49.95
66.06	23.33	190.64	16.09	56.4	35.32	12.24	67.23	9.01	107.01	9.4	38.77	13.41	8.42	54.52	9.08	174.42	19.72	36.18	16.65	5.2	67.13	60.08	232.53	17.6	32.38	89.49	25.84
121.83	118.64	191.32	8.72	25.64	97.38	62.01	36.09	32.53	80.07	3.88	36.2	90.13	40.63	35.32	20.09	114.58	7.08	43.83	56.89	17.54	65.51	48.97	180.58	13.74	25.74	74.75	27.12
63.72	53.1	123.18	14.55	36.39	83.34	43.11	35.88	28.25	70.51	15.68	76.26	78.73	40.06	81.03	65.44	199.39	10.73	23.23	80.76	32.82	66.74	53.12	105.34	4.05	47.31	79.58	50.42
38.75	29.54	82.58	3.33	51	76.23	35.77	30.97	26.47	84.7	9.94	36.04	85.47	31.25	62.41	47.44	217.26	8.64	43.65	76.01	21.83	120.32	117.73	223.09	9.66	35.2	97.85	52.77
39.43	16.33	88.56	10.03	366.96	41.41	18.44	18.87	8	59.72	4.82	58.36	42.42	13.4	75.35	71.86	142.04	7.63	29.92	95.37	50.59	80.6	74.97	120.42	6.43	40.8	93.01	62.26
36.76	35.57	89.63	5.98	46.92	96.76	39.69	63.49	39.36	130.92	8.64	45.11	62	30.07	24.54	3.57	59.94	12.19	170.67	14.54	5.95	110.98	108.26	230.13	9.98	33.4	97.55	47.04
78.2	68.83	155	13.68	39.89	88.02	44.41	45.85	28.88	122.28	10.44	15.67	63	23.62	41.72	15.53	110.68	10.25	76.35	37.22	14.03	35.15	24.23	90.7	5.1	54.34	68.94	26.72
68.42	56.79	200.35	11.06	30.41	83.01	28.35	118.08	116.02	250.77	8.6	26.82	98.25	46.27	59.43	46.2	124.67	6.61	35.49	77.74	37.06	72.59	70.34	174.26	9.85	28.53	96.9	40.36
97.25	94.4	130.45	7.83	26.14	97.07	72.36	23.36	4.14	46.21	5.21	84.6	17.72	8.96	105.64	101.76	259.78	10.71	25.74	96.33	39.17	103.33	56.93	129.98	4.57	38.27	55.1	43.8
99.93	93.22	240.86	8.48	29.24	93.28	38.7	79.63	65.75	170.36	28.01	25.45	82.57	38.6	22.28	8.93	67.47	5.75	60.53	40.09	13.24	66.85	62.51	105.05	3.54	43.52	93.51	59.51
71.34	60.08	233.09	11.91	28.53	84.22	25.78	50.16	36.33	90.8	6.77	37.4	72.42	40.01	67.45	57.71	97.57	4.29	50.47	85.56	59.15	41.08	9.72	94.01	6.59	51.39	23.65	10.34
132.42	122.87	264.76	7.44	34.79	92.79	46.41	116.01	114.47	171.66	10.15	28.42	98.67	66.68	34.95	22.14	89.55	5.59	42.49	63.35	24.73	62.57	12.61	117.59	7.86	59.12	20.16	10.73
73.42	68.33	193.23	9.58	16.51	93.06	35.36	70.68	11.64	162.05	14.73	29.92	16.47	7.18	80.93	80.24	126.37	11.89	23.57	99.14	63.49	84.76	82.97	175.21	12.58	18.09	97.89	47.36
127.79	123.15	267.84	8.91	35.08	96.37	45.98	97.85	95.73	205.95	11.36	27.2	97.83	46.48	61.18	21.51	164.26	14.32	99.28	35.15	13.09	113.6	110.85	232.42	7.91	30.6	97.58	47.7
45.71	42.41	88.79	5.68	49.28	92.77	47.76	49.19	36.38	193.46	9.53	54.4	73.95	18.8	15.92	10.08	49.2	2.8	41.53	63.31	20.49	20.62	10.76	63.7	5.02	36.45	52.17	16.89
52.74	6.9	102.72	15.3	85	13.08	6.71	45.96	22.5	93.02	6.56	51.96	48.97	24.19	25.66	9.94	70.01	6.08	49.28	38.73	14.2	131.37	130.49	194.27	10.17	31.34	99.33	67.17
105.86	104.16	197.25	11.03	41.82	98.39	52.81	109.63	104.61	233.69	17.74	33.82	95.42	44.77	99.26	86.05	269.33	19.68	29.92	86.7	31.95	63.29	56.5	218.37	10.98	21.63	89.26	25.87
121.84	119.32	252.32	8.4	28.39	97.93	47.29	108.25	104.97	239.1	14.74	36.45	96.97	43.9	22.79	10.78	57.53	12.53	84.65	47.31	18.74	46.16	21.46	119.96	9.12	25.65	46.5	17.89
97.95	93.16	220.34	9.88	30.29	95.12	42.28	9.43	2.36	20.84	4.78	241.46	25.06	11.34	65.04	57.39	225.39	14.82	35.2	88.25	25.46	140.45	137.76	178.15	11.14	27.88	98.09	77.33
45.97	45.14	83.76	4.25	44.71	98.19	53.89	66.13	61.57	207.03	16.51	28.56	93.1	29.74	71.38	55.56	175.77	10.92	27.83	77.84	31.61	58.8	42	225.6	10.6	59.84	71.43	18.62
49.45	0.71	152.98	19.6	110.84	1.43	0.46	108.32	103.42	221.2	10.22	35.77	95.48	46.76	71.01	66.95	101.61	4.3	38.52	94.29	65.9	50.58	16.73	180.21	11.82	51	33.07	9.28
80.58	77.36	184.55	8.75	17.6	96	41.92	57.66	39.9	204.77	9.39	50.58	69.19	19.48	27.44	17.06	88.56	9.58	55.02	62.18	19.26	59.96	16.2	193.1	15.01	67.68	27.02	8.39
78.53	59.02	229.65	9.66	35.36	75.15	25.7	119.03	116.05	223.71	10.95	36.88	97.5	51.88	36.48	13.4	99.92	12.98	15.14	36.72	13.41	45.33	35.66	169.64	10.04	25.84	78.67	21.02
25.37	11.35	71.12	4.98	50.9	44.73	15.96	35.41	11.36	120.22	7.82	55.15	32.08	9.45	51.19	9.46	76.64	5.78	43.14	18.47	12.34	67.95	67.22	175.51	13.76	17.6	98.94	38.3
81.89	31.44	192.78	18.65	44.35	38.39	16.31	65.85	32.03	302.64	11.04	95.88	48.64	10.58	32.05	6.4	106.72	6.82	43.33	19.97	6	12.54	5.99	32.51	2.56	48.28	47.8	18.43
102.33	99.81	130.96	6.28	24.08	97.54	76.22	68.76	66.19	167.36	9.72	16.32	96.26	39.55	92.45	86.06	220.25	9.99	33.01	93.09	39.08	41.05	3.94	100.75	14.3	64.06	9.61	3.91
67.14	44.83	86.5	3.15	40.94	66.77	51.82	75.6	41.85	166.53	16.19	29.92	55.36	25.13	111.4	107.14	241.57	11.77	28.16	96.17	44.35	49.38	46.17	207.73	10.83	24.76	93.52	22.23
32.39	9.53	68.29	5.97	59.84	29.41	13.95	127.03	123.45	236.43	15.27	40.19	97.18	52.21	65.88	32.23	115.2	11.8	40.8	48.91	27.97	46.75	18.89	146.06	10.64	59.84	40.41	12.93
105.51	100.89	205.9	10.01	23.1	95.62	49	47.03	23.34	161.65	10.73	47.46	49.62	14.44	89.62	86.83	201.13	8.84	21.12	96.89	43.17	52.67	8.89	110.63	8.18	103.86	16.88	8.04
45.71	8.33	112.7	11.17	62.62	18.22	7.39	54.16	36.02	192.63	8.96	39.44	66.51	18.7	52.17	39.74	182.22	10.03	26.52	76.17	21.81	49.74	29.93	169.86	8.59	49.28	60.16	17.62
137.63	133.35	214.73	10.43	35.08	96.89	62.1	72.43	42.17	169.3	8.28	34.68	58.23	24.91	23.17	8.14	58.52	4.61	49.5	35.12	13.9	60.59	54.26	139.18	10.07	14.58	89.55	38.99
29.01	10.28	88.37	6.88	24.08	35.42	11.63	38.42	25.09	142.3	8.98	25.84	65.29	17.63	43.05	14.65	115.74	8.68	56.44	34.04	12.66	49.02	31.1	157.18	12.03	50.79	63.45	19.79
60.48	31.11	139.96	10.98	19.04	51.43	22.23	50.2	20.44	99.97	5.66	30.98	40.72	20.44	58.98	21.41	104.15	6.53	43.65	36.3	20.56	147.58	147.18	194.12	10.89	31.49	99.73	75.82
47.43	25.9	118.69	8.48	49.52	54.62	21.83	71.52	67.12	152.12	7.67	14.96	93.85	44.12	146.41	145.16	209.6	9.24	40.8	99.15	69.26	46.1	19.24	110.3	9.04	36.72	41.73	17.44
60.35	20.73	140.61	10.07	27.46	34.34	14.74	37.21	21.64	100.29	7.37	36.04	58.15	21.58	20.94	13.9	78.2	5.32	37.4	66.35	17.77	39.76	36.64	150.46	11.53	19.48	92.17	24.35
65.59	62.5	166.09	7.87	31.64	95.29	37.63	57.65	38.97	190.85	9.24	41.05	67.59	20.42	48.38	41.91	208.67	9.78	25.16	86.62	20.08	45.43	32.83	192.91	11.66	31.96	72.25	17.02
60.1	57.79	97.49	4.82	38.52	96.15	59.28	40.94	10.5	62.94	7.18	37.83	25.64	16.68	20.62	11.86	63.9	3.66	47.46	57.52	18.56	51.73	13.56	121.81	9.04	27.2	26.21	11.13
82.07	80.29	167.35	13.17	22.44	97.83	47.98	24.85	11.33	73.83	4.95	52.63	45.59	15.34	111.95	108.23	226.61	8.47	24.07	96.67	47.76	39.02	24.04	87.1	5.45	43.14	61.61	27.6
27.98	24.66	69.33	3.74	40.12	88.13	35.56	41.24	12.44	94.52	7.02	18.41	30.16	13.16	46.06	18.44	112.94	10.21	33.32	40.04	16.33	140.68	139.04	229.01	10.65	33.4	98.83	60.71
126.34	123.12	193.75	10.35	31.06	97.46	63.55	48.47	15.32	100.28	8.79	37.83	31.6	15.27	54.47	22.99	106.84	19.44	32.54	42.21	21.52	148.39	147.36	227.48	9.31	32.7	99.31	64.78
111.91	107.13	200.03	11.61	19.48	95.73	53.56	145.23	143.64	204.33	9.11	28.86	98.91	70.3	16.77	2.94	57.2	5.47	77.68	17.51	5.13	67.75	43.41	251.72	11.28	29.57	64.08	17.25
69.55	15.89	222.91	21.67	112.64	22.85	7.13	146.65	141.77	264.87	10.64	38.27	96.67	53.52	136.67	136.2	154.69	9.29	23.94	99.65	88.04	39.36	23.91	117.13	7.09	46.54	60.74	20.41
83.08	78.73	203.34	10.65	22.01	94.76	38.72	89.36	82.86	127.25	6.08	40.58	92.73	65.12	46.9	22.91	101.35	7.29	52.96	48.85	22.6	54.54	45.76	150.38	9.36	19.95	83.9	30.43
31.61	13.36	72.28	4.34	57.68	42.25	18.48	43.69	22.52	100.72	6.09	51.39	51.55	22.36	50.35	9.98	81.73	6.74	38.08	19.82	12.21	33.33	17.24	67.64	4.65	37.14	51.75	25.5
36.23	8.74	109.34	7.64	72.91	24.11	7.99	71.3	67.64	126.51	10.88	17.68	94.87	53.47	126.5	112.9	158.46	12.09	21.02	89.25	71.25	165.69	163.1	226.41	11.25	39.44	98.43	72.04
90.1	86.66	192.45	9.58	19.04	96.18	45.03	52.19	45.22	153.89	7.61	29.57	86.65	29.38	112.74	106.51	211.41	9.42	25.84	94.48	50.38	156.56	154.83	218.37	8.76	42.11	98.89	70.9
74.33	71.33	207.16	9.72	21.08	95.96	34.43	39.93	20.69	133.26	11.73	26.52	51.83	15.53	54.49	25.1	103.87	7.34	35.9	46.07	24.17	82.73	65.33	192.73	11.29	20.98	78.96	33.9
35.75	12.07	92.31	7.72	37.4	33.77	13.08	49.31	8.06	90.59	7.55	47.02	16.35	8.9	59.07	55.8	210.92	13.21	17.6	94.46	26.46	50.46	17.04	122.41	10.78	36.04	33.77	13.92
40.69	17.03	127.42	10.11	22.96	41.85	13.36	38.16	30.65	144.34	13.51	37.83	80.33	21.23	143.98	141.1	259.21	9.8	29.92	98	54.43	29.02	3.31	60.97	4.14	78.2	11.4	5.43
59.68	55.82	111.82	5.13	34.39	93.53	49.92	74.63	73.06	124.37	10.4	21.57	97.89	58.75	92.61	87.37	171.22	5.05	45.53	94.34	51.03	133.47	131.53	164.5	9.04	27.78	98.55	79.96
60.85	35.54	139.18	10.68	51.17	58.41	25.54	122.26	113.52	237.84	29.23	26.14	92.85	47.73	153.32	150.35	243.36	8.26	38.39	98.06	61.78	56.11	31.43	211.64	10.96	59.15	56.02	14.85
27.63	9.04	98.57	5.68	102.98	32.71	9.17	31.43	4.28	85.44	12.75	139.4	13.61	5	42.55	8.46	105.26	10.14	57.8	19.87	8.03	22.49	1.02	70.17	11.83	110.52	4.55	1.46
89.65	82.54	233.19	10.69	29.56	92.07	35.4	42.06	8.59	89.5	7.62	41.22	20.43	9.6	145.61	142.17	282.45	9.57	40.12	97.63	50.33	79.26	76.93	175.79	8.67	16.86	97.07	43.76
25.42	9.51	81.14	6.37	39.6	37.39	11.71	48.62	44.09	191.2	9.2	19.72	90.68	23.06	54.1	26.24	191.08	11.96	38.76	48.51	13.73	130.79	129.62	148.42	4.19	40.8	99.1	87.33
28.51	10.2	74.65	7.79	63.92	35.77	13.66	39.23	16.11	74.69	16.62	96.26	41.06	21.57	40.46	7.55	94.64	7.9	46.46	18.67	7.98	32.32	6.13	97.84	6.04	45.16	18.95	6.26
85.23	82.15	161.75	10.18	14.44	96.39	50.79	49.01	21.91	171.95	13.49	50.9	44.71	12.74	30.42	7.43	92.45	6.41	46.08	24.42	8.03	30.12	12.79	77.45	4.66	57.02	42.46	16.51
81.44	71.91	237.28	14.2	23.8	88.3	30.3	112.72	102.04	184.28	25.81	24.07	90.52	55.37	148.46	142.72	223.46	9.23	30.26	96.14	63.87	119.51	115.07	222.54	10.17	30.26	96.28	51.71
33.99	8.75	64.44	8.33	49.87	25.76	13.58	85.45	12.3	200.69	18.19	92.48	14.4	6.13	48.01	29.7	115.61	9.13	34.49	61.87	25.69	71.64	69.62	136.24	11.62	26.82	97.17	51.1
30.25	19.74	54.86	3.33	38.41	65.25	35.97	74.54	11.51	128.12	18.3	59.84	15.44	8.99	86.4	80.72	211.32	12.75	24.48	93.43	38.2	141.32	137.87	168.29	7.34	28.86	97.56	81.92
47.47	9.63	91.62	5.94	39.08	20.28	10.51	126.58	120.61	180.89	9.4	24.64	95.28	66.68	68.24	59.07	230.25	13.16	37.14	86.56	25.66	67.26	31.44	118.68	8.26	42.94	46.74	26.49
54.39	20.16	142.51	10.43	42.84	37.07	14.15	96.68	94.34	229.4	9.88	36.77	97.58	41.13	58.12	44.49	205.08	11.88	45.26	76.55	21.7	58.49	55.07	131.02	9.71	15.54	94.16	42.03
54.78	19.63	189.27	10.9	45.39	35.84	10.37	160.64	160.21	218	8.85	26.11	99.73	73.49	61.59	25.38	171.81	12.43	36.82	41.2	14.77	17.37	7.46	52.64	3.34	57.77	42.96	14.18
62.77	40.87	153.91	13.35	44.71	65.11	26.56	38.32	2.41	102.02	16.86	80.92	6.28	2.36	49.17	32.86	183.04	12.69	36.88	66.83	17.95	17.6	4.57	42.95	4.29	52.71	25.96	10.64
47.23	4.92	103.49	17.95	91.47	10.42	4.75	73.27	68.64	109.24	10.99	40.12	93.68	62.83	76.76	75.27	110.46	4.4	43.33	98.07	68.14	53.67	21.5	150.06	7.13	61.88	40.05	14.32
114.23	110.54	228.01	9.87	28.53	96.78	48.48	74.94	68.71	128.71	11.54	76.07	91.69	53.38	53.47	22.3	224.24	12.18	70.16	41.71	9.95	76.84	43.83	241.14	13.51	57.7	57.04	18.18
59.95	49.16	203.2	12.35	17.26	82.01	24.2	39.08	19.1	86.6	6.55	28.49	48.87	22.05	60.25	13.13	162.54	9.17	58.45	21.79	8.08	130.21	128.87	228.07	12.05	38.08	98.98	56.51
75.3	62.07	142.65	14.91	36.45	82.43	43.51	34.98	9.35	83.6	7.04	57.09	26.73	11.18	155.42	151.09	265.85	10.8	28.84	97.21	56.83	64.78	57.34	155.77	8.38	19.95	88.51	36.81
65.89	55.99	193.97	10.36	21.76	84.97	28.86	77.94	69.07	198.9	11.94	21.32	88.61	34.72	107.22	104.94	193.89	10.02	24.48	97.87	54.12	52.29	43.99	180.07	10.96	42.85	84.14	24.43
54.51	28.93	163.42	9.63	42.32	53.06	17.7	33.12	20.29	84.57	10.33	23.8	61.27	23.99	44.18	33.18	168.64	11.77	39.18	75.1	19.67	55.75	53.48	177.51	11.38	16.95	95.91	30.13
136.79	134.6	195.58	12.65	25.05	98.4	68.82	49.13	14.65	113.71	6.09	39.44	29.83	12.89	59.02	53.7	182.65	10.81	19.48	90.99	29.4	87.82	83.71	167.12	10.73	19.95	95.32	50.09
42.43	13.37	121.02	9.05	41.53	31.52	11.05	52.11	29.76	139.46	11.18	18.57	57.11	21.34	158	153.47	278.93	13.48	30.95	97.13	55.02	145.04	144.51	182.5	11.28	23.76	99.64	79.19
15.7	12.69	32.64	1.82	25.74	80.88	38.89	128.1	125.92	204.43	10.32	29.24	98.3	61.6	126.23	54.33	240.11	20.9	41.27	43.04	22.63	124.55	51.13	372.55	26.86	176.56	41.05	13.72
22.18	14.69	62.75	15.25	37.14	66.26	23.42	52.76	48.73	178.83	12.34	17.88	92.37	27.25	149.22	146.03	240.57	8.66	35.36	97.86	60.7	138.81	132.08	174.57	6.84	28.53	95.15	75.66
47.95	9.87	104.1	15.79	42.84	20.58	9.48	25.99	6.34	56.99	4.19	67.69	24.4	11.13	75.24	66.27	217.44	13.11	31.77	88.07	30.48	19.63	7.71	75.51	5.63	71.53	39.26	10.21
18.67	12.86	48.04	4.35	14.96	68.87	26.77	67.71	58.39	162.03	10.75	21.31	86.23	36.04	42.52	10.5	96.12	13.17	41.81	24.7	10.92	57.42	55.85	89.19	8.31	21.08	97.26	62.62
14.4	9.15	30.02	2.58	34.52	63.55	30.48	73.98	66.33	116.09	7.19	42.84	89.65	57.13	35.63	11.12	135.21	7.96	63.53	31.21	8.22	71.63	64.16	216.05	10.33	22.44	89.57	29.69
98.14	93.95	172.71	11.16	21.32	95.72	54.4	62.99	59.77	151.38	9.84	22.44	94.89	39.48	31.25	14.63	110.58	8.03	55.02	46.8	13.23	89.73	85.29	140.3	12.3	22.05	95.05	60.79
18.62	14.43	51.6	3.84	29.92	77.5	27.97	90.97	74.41	222.74	20.86	26.14	81.8	33.41	72.11	64.19	124.03	7.75	24.76	89.01	51.76	154.91	147.38	232.77	10.4	36.88	95.14	63.32
29.47	19.05	94.77	9.75	43.33	64.65	20.1	159.54	152.27	234.28	10.32	29.58	95.44	64.99	113.55	108.12	205.62	10.01	23.66	95.22	52.58	151.51	145.41	241.46	9.24	34.49	95.97	60.22
141.6	138.51	202.78	8.77	40.8	97.82	68.31	50.57	16.23	135.32	9.07	50.32	32.09	11.99	90.77	49.63	208.28	12.73	35.08	54.68	23.83	152.43	151.89	156.53	6.73	21.76	99.65	97.03
9.55	8.72	24.38	1.48	39.21	91.31	35.78	29.64	11.19	72.48	6.83	47.6	37.77	15.45	152.44	150.89	234.34	9.59	40.58	98.99	64.39	115.1	110.26	163.64	9.65	22.27	95.79	67.38
19.53	19.22	28.3	1.78	26.75	98.43	67.92	69.15	62.46	136.19	9.38	28.86	90.33	45.86	79.33	61.21	137.19	5.46	53.04	77.16	44.62	99.27	97.2	190.14	11.79	27.83	97.92	51.12
75.65	71.56	209.49	12.29	17	94.58	34.16	28.65	11.92	78.55	7.41	27.88	41.61	15.18	66.59	56.71	215.9	10.88	41.27	85.17	26.27	30.77	5	101.62	11.66	44.88	16.26	4.92
49.6	29.6	168.56	10.38	37.14	59.68	17.56	60.1	55.8	128.18	11.7	22.53	92.85	43.53	44.32	34.95	132.91	8.72	25.16	78.86	26.3	171.52	170.91	201.94	9.2	32.38	99.65	84.63
12.59	9.98	32.95	2.72	34.68	79.3	30.29	108.15	100.34	244.18	13.03	30.95	92.77	41.09	65.61	53.35	177.3	9.62	19.04	81.31	30.09	147.93	139.46	210.24	13.58	27.51	94.28	66.33
14.14	9.93	44.1	3.04	45.56	70.21	22.51	90.95	36.93	187.88	10.69	38.52	40.6	19.65	167.58	165.58	255.14	11.82	35.77	98.8	64.9	52.68	13.41	95.55	12.45	72.66	25.45	14.03
13.47	12	30.15	1.5	43.14	89.09	39.79	58.47	48.47	186.51	12.11	29.22	82.9	25.99	168.5	165.89	251.27	10.96	33.7	98.45	66.02	174.11	166.59	207.11	14.73	29.21	95.68	80.44
13.44	12.05	25.26	2.14	42.84	89.69	47.72	87.35	73.17	243.01	15.58	16.95	83.76	30.11	19.69	4.72	56.49	7.26	99.97	23.99	8.36	52.34	25.19	110.52	6.62	35.77	48.12	22.79
45.65	21.49	137.5	10.83	53.65	47.07	15.63	169.44	168.46	224.85	10.51	31.75	99.43	74.92	61.4	47.61	186.45	11.79	24.68	77.54	25.54	71.94	70.02	108.52	6.14	14.61	97.33	64.52
125.19	121.85	199.93	8.4	23.51	97.33	60.95	71.2	31.61	202.38	11.14	48.96	44.39	15.62	58.68	52.3	196.75	11.09	40.36	89.13	26.58	38.06	31.29	103.97	6.02	32.01	82.2	30.09
115.89	111.24	202.89	9.26	28.2	95.98	54.83	85.07	81.61	149.73	9.53	13.6	95.94	54.51	50.95	43.44	179.4	10.97	17	85.26	24.21	38.04	15	109.12	8.94	59.84	39.44	13.75
76.88	65	179.19	10.48	27.2	84.55	36.28	72.05	69.1	185.84	10.29	23.12	95.9	37.18	75.26	73.96	127.21	10.27	18.57	98.27	58.14	83.98	80.63	133.56	10.27	21.12	96.02	60.37
97.8	96.35	190.49	9.93	36.18	98.51	50.58	93.87	91.65	168.92	11.3	24.07	97.63	54.25	52.41	39.33	121.77	13.31	42.84	75.04	32.3	156.27	154.06	200.34	9.22	24.24	98.58	76.9
14.96	12.14	39.4	2.35	36.72	81.15	30.8	34.63	13.87	84.47	6.01	42.16	40.06	16.42	28.52	17.13	104.77	7.03	62.65	60.05	16.35	27.87	10.1	57.41	4.04	48.96	36.23	17.59
15.73	14.33	34.84	2.35	36.72	91.08	41.13	46.63	23.17	168.25	10.71	70.84	49.7	13.77	47.98	21.95	138.25	9.91	44.2	45.76	15.88	57.66	38.35	134.59	15.04	42.64	66.52	28.5
11.59	7.1	50.64	3.7	57.75	61.26	14.01	40.14	11.31	79.04	5.08	33.32	28.18	14.31	35.21	8.81	84.92	8.28	56.4	25.01	10.37	33.32	4.99	120.88	9.57	51.49	14.97	4.13
97.43	27.68	221.58	13.59	42.03	28.41	12.49	25.02	9.84	63.1	5.72	26.13	39.34	15.6	116.28	109.75	235.42	11.77	36.88	94.38	46.62	53.37	5.12	71.95	9.02	51.99	9.59	7.11
55.96	47.55	192.44	11.06	29.24	84.97	24.71	57.3	38.91	143.76	9.96	36.04	67.91	27.07	110.47	109.09	202.48	9.21	28.53	98.75	53.88	29.68	8.1	98.16	5.34	38.78	27.31	8.26
15.51	9.84	35.82	2.14	35.49	63.4	27.46	77.66	48.16	194.55	16.07	22.31	62.01	24.75	56.29	19.93	173.14	17.12	91.8	35.4	11.51	155.87	153.43	183.35	7.88	25.74	98.44	83.69
93.16	90.5	202.15	9.95	28.16	97.14	44.77	52.78	21.76	128.94	8.34	42.16	41.23	16.88	42.26	18.96	136.72	11.44	45.64	44.87	13.87	20.14	7.98	76.11	7.19	24.76	39.6	10.48
16.21	10.53	43.72	2.25	30.95	65	24.09	44.14	7.84	90.11	6.15	70.72	17.76	8.7	68.76	61.84	131.35	9.23	13.6	89.93	47.08	40.52	23.8	112.14	9.13	22.44	58.72	21.22
12.59	11.12	35.04	1.92	47.02	88.31	31.74	60.35	49	210.75	14.03	27.83	81.19	23.25	81.8	71.92	188.04	21.81	26.75	87.93	38.25	152.79	141.83	177.66	10.4	21.76	92.83	79.83
12.51	7.05	45.51	3.63	38.08	56.39	15.5	56.83	41.13	228.92	9.2	66.03	72.38	17.97	38.99	19.34	93.11	8.56	23.94	49.6	20.77	141.95	126.62	216.44	15.85	37.83	89.2	58.5
14.06	10.58	45.41	2.45	37.14	75.23	23.3	51.29	12.08	86.32	6.25	34.68	23.55	13.99	77.9	75.2	170.96	11.8	16.25	96.54	43.99	39.79	20.97	88.9	5.38	55.08	52.7	23.58
24.01	9.4	62.25	16.66	37.4	39.15	15.1	129.21	120.09	202.24	9.96	29.57	92.94	59.38	33.17	7.74	93.17	6.88	36.04	23.32	8.3	60.16	33.32	153.5	12.41	41.8	55.4	21.71
100.15	95.57	186.98	9.4	25.32	95.43	51.11	43.52	38.75	154.48	11.82	15.34	89.06	25.09	46.21	35.01	130.92	10.32	29.92	75.76	26.74	56.18	37.13	230.02	11.02	48.01	66.09	16.14
16.24	12.65	51.64	4.07	43.65	77.9	24.49	60.94	17.12	128.79	14.38	37.9	28.09	13.29	72.57	70	198.24	11.29	21.82	96.46	35.31	23.23	12.22	53.69	4.76	50.73	52.61	22.76
101.73	98.81	191.79	10.18	23.12	97.13	51.52	54.12	40.14	119.71	8.13	24.07	74.17	33.53	82.12	28.13	197.16	12.01	36.18	34.25	14.27	64.01	58.17	164.35	9.8	21.16	90.88	35.4
12.54	9.31	35.46	2.26	29.24	74.25	26.25	40.76	26.14	139.39	11.64	22.44	64.12	18.75	27.99	17.48	98.67	8.59	77.03	62.45	17.72	90.99	87.57	217.69	10.22	32.64	96.24	40.23
27.49	15.35	69.1	5.43	32.41	55.82	22.21	52.5	22.9	161.4	9.98	55.76	43.62	14.19	50.17	37.31	206.14	9.84	53.43	74.37	18.1	51.22	39.4	213.44	12.81	28.56	76.92	18.46
9.77	7.94	34.74	3.3	54.4	81.26	22.85	126.53	83.82	180.87	17.39	25.45	66.25	46.34	51.32	47.4	64.44	2.84	39.44	92.35	73.55	73.71	5.26	176.18	13.67	54.4	7.14	2.99
34.85	17.06	79.45	8.45	46.24	48.96	21.48	46.08	14.38	106.47	7.49	42.24	31.21	13.51	163.14	160.23	215.01	10.28	33.7	98.22	74.52	125.31	123.92	177.32	8.45	30.26	98.89	69.89
60.89	44.63	218.94	10.19	44.88	73.29	20.38	60.25	41.08	177.58	23.16	38.08	68.18	23.13	42.27	28.16	164.17	11.53	39.89	66.62	17.15	43.14	9.67	160.16	29	50.32	22.42	6.04
16.94	6.97	45.7	3.01	48.28	41.14	15.25	134.2	132.05	203.59	10.8	31.31	98.4	64.86	23	10.08	71.13	5.52	35.36	43.81	14.17	90.41	85.9	158.82	10.27	16.32	95.01	54.09
46.01	20.34	85.82	6.68	40.36	44.21	23.7	25.75	7.06	61.3	4.51	55.76	27.41	11.52	89.65	78.11	130.68	11.41	40.58	87.13	59.77	61.74	58.78	97.98	8.88	27.81	95.21	59.99
76.06	74.47	163.91	8.19	17	97.92	45.43	61.32	42.29	158.95	12.49	37.31	68.97	26.61	59.96	23.73	117.96	13.17	53.04	39.57	20.11	70.32	65.74	235.5	10.18	27.2	93.49	27.91
78.38	70.85	140.17	12.68	15.65	90.39	50.54	137.55	133.39	204.48	12.24	32.54	96.97	65.23	44.32	19.01	106.25	8.4	42.16	42.9	17.89	12.82	6.77	53.41	4.44	65.28	52.84	12.68
21.86	13.84	35.76	2.55	30.35	63.31	38.71	74.06	71.31	257.25	11.29	29.22	96.28	27.72	47.65	24.59	119.5	6.95	34.09	51.61	20.58	25.56	16.02	70.42	6.8	58.41	62.68	22.75
155.84	154.1	212.57	9.83	36.45	98.88	72.49	60.01	57.8	100.99	4.98	22.53	96.32	57.23	115.96	113.14	181.14	10.21	22.44	97.57	62.46	162.58	145.86	203.19	13.28	46.92	89.72	71.79
39.41	14.9	71	5.27	31.49	37.8	20.98	9.95	6.28	27.06	1.63	37.14	63.13	23.22	59.67	45.43	201.16	8.46	34.68	76.14	22.59	42.5	29.37	122.13	11.98	45.39	69.1	24.05
56.75	54.9	117.84	9.67	21.08	96.74	46.59	36.38	14.93	72.96	4.75	42.24	41.02	20.46	42.14	32.73	158.41	12.9	14.96	77.66	20.66	21.68	15.68	65.97	4.16	53.65	72.32	23.76
48.08	25.46	101.01	7.06	38.08	52.95	25.2	10.68	2.73	47.32	27.32	52.25	25.57	5.77	101.11	97.06	114.16	3.44	42.16	95.99	85.03	44.91	32.02	166.85	12.1	35.77	71.3	19.19
41.44	15.16	80.22	5.84	37.14	36.57	18.89	71.92	53.56	182.85	10.28	44.2	74.48	29.29	40.31	24.86	174.02	9.61	53.04	61.68	14.29	52.54	41.89	179.67	11.61	26.59	79.74	23.32
54.6	36.33	223.6	11.2	59.14	66.54	16.25	50.26	42.5	116.1	8.8	31.34	84.56	36.61	24.97	9.19	86.36	5.86	63.92	36.82	10.65	36.77	23.2	141.5	13.92	40.54	63.09	16.39
40.78	5.44	86.92	5.99	41.05	13.34	6.26	60.84	46.55	158.33	9.61	16.51	76.51	29.4	154.52	151.39	219.72	8.11	38.72	97.98	68.9	16.78	7.37	62.4	4.56	73.92	43.9	11.81
24.7	5.92	62.27	6.08	89.76	23.95	9.5	50.15	6.64	239.33	11.31	122.4	13.24	2.77	67.11	65.45	169.47	10.35	15.64	97.52	38.62	28.06	22.82	74.23	3.93	35.08	81.31	30.74
77.96	75.16	117.69	9.35	17.7	96.41	63.86	107.21	105.06	154.11	10.17	26.75	97.99	68.17	57.14	38.85	139.02	12.12	32.7	67.99	27.95	27.11	14.01	97.53	13.1	47.31	51.66	14.36
66.62	58.52	177.27	9.08	20.71	87.85	33.01	65.11	48.1	202.79	11.34	46.62	73.88	23.72	49	30.21	128.72	8.27	52.88	61.64	23.47	136.48	134.66	172.72	8.57	29.24	98.67	77.97
124.44	122.33	272.16	8.6	37.4	98.3	44.95	70.07	29.27	165.7	8.62	36.18	41.77	17.67	33.7	23.34	133.65	10.24	15.82	69.26	17.46	64.84	37.63	265.33	18.53	38.27	58.05	14.18
136.35	132.75	166.66	9.95	27.83	97.36	79.65	25.74	12.56	41.57	3.09	28.49	48.77	30.2	116.16	110.77	187.15	10.58	23.8	95.36	59.19	152.91	150.07	213.23	7.76	44.02	98.14	70.38
89.41	82.91	214.88	23.18	32.38	92.72	38.58	16.92	14.26	37.77	4.36	21.08	84.29	37.76	73.44	60.54	213.67	9.77	22.7	82.44	28.34	55.16	21.89	206.31	28.3	64.6	39.69	10.61
140.53	136.62	205.49	9.66	33.7	97.22	66.48	54.75	18.4	94.29	14.48	25.16	33.6	19.51	53.16	43.3	196.75	12.64	26.14	81.45	22.01	28.3	9.53	80.46	5.76	46.46	33.67	11.84
84.97	82.24	161.81	10.38	20.4	96.79	50.82	27.07	8.9	72.43	5.51	86.36	32.87	12.29	95.73	92.49	170.54	10.02	18.79	96.62	54.23	91.88	84.34	135.71	7.51	36.33	91.79	62.15
65.43	55.18	202.51	11.55	28.42	84.34	27.25	50.5	19.48	76.89	16.06	41.32	38.57	25.33	95.86	95.2	146.21	13.13	20.4	99.32	65.11	29.9	11.58	96.4	5.83	77.52	38.74	12.02
111.25	107.37	184.64	10.76	29.58	96.51	58.15	10.89	9.93	24.77	1.34	37.57	91.25	40.11	80.57	79.22	117.31	4.96	19.58	98.32	67.53	97.19	93.59	118.28	4.19	32.44	96.29	79.13
106.53	99.18	185.39	8.76	23.12	93.09	53.5	34.51	22.83	93.02	8.31	28.2	66.15	24.54	36.85	18.11	114.91	7.79	33.24	49.15	15.76	109.57	108.2	236.83	9.88	34.3	98.75	45.69
96.44	93.03	236.85	10.78	36.45	96.46	39.28	72.54	69.71	167.73	7.86	31.31	96.1	41.56	135.76	133.73	229.62	10.47	37.14	98.51	58.24	64.37	46.84	178.89	13.97	29.22	72.76	26.18
58.45	57.33	120.94	9.61	14.96	98.07	47.4	66.21	64.43	152.91	11.56	17.68	97.31	42.14	27.47	13.01	95.42	9.38	24.35	47.36	13.63	38.1	4.28	68.32	6.51	41.67	11.22	6.26
54.11	30.19	236.39	13.33	57.75	55.8	12.77	106.73	99.8	205.65	9.53	23.12	93.5	48.53	73.43	69.61	114.04	6.94	41.96	94.8	61.04	62.56	40.06	86.55	4.05	41.37	64.02	46.28
40.97	31.85	165.15	8.92	45.92	77.75	19.29	112.35	110.25	181.78	7.84	22.88	98.14	60.65	172.23	167.84	234.58	10.95	42.44	97.45	71.55	32.91	30.87	52.27	2.05	46.62	93.81	59.07
43.09	16.56	125.79	8.49	53.65	38.42	13.16	75.22	72.14	168.81	11.33	17	95.9	42.73	122.4	114.27	190.61	10.98	22.96	93.36	59.95	104.89	57.42	254.58	15.8	32.38	54.74	22.55
144.69	138.71	209.16	10.12	31.96	95.86	66.32	75.15	69.68	215.76	10.71	22.08	92.72	32.3	12.52	6.25	40.47	5.75	184.05	49.9	15.44	103.69	99.59	176.89	10.35	20.18	96.05	56.3
104.95	93.78	188.74	11.05	40.36	89.36	49.69	10.49	8.8	35.06	2.39	31.68	83.94	25.11	32.03	0.86	86.06	21.29	214.2	2.68	1	90.23	84.79	158.11	11.72	20.91	93.97	53.63
60.01	42.49	173.89	9.17	42.64	70.8	24.44	98.68	92.78	174.9	8.58	21.57	94.02	53.05	27.5	18.97	78.18	12.38	16.51	68.97	24.26	49.44	48.22	65.43	2.14	44.53	97.52	73.69
37.5	8.67	171.22	10.14	81.47	23.13	5.07	89.07	87.12	147.76	9.15	16.51	97.81	58.96	43.81	13.98	85.34	7.81	55.29	31.91	16.38	83.38	72.43	150.12	7.88	44.71	86.87	48.25
137.73	132.48	284.86	8.93	30.71	96.19	46.5	45.64	21.4	75.92	4.66	52.27	46.89	28.19	63.41	38.41	204.14	12.86	36.88	60.58	18.82	28.87	12.15	125	7.36	83.35	42.09	9.72
58.22	12.58	105.94	5.83	53.65	21.6	11.87	118.71	115.39	211.52	8.59	36.72	97.2	54.55	128.02	101.68	240.89	13.31	38.52	79.43	42.21	46.4	23.91	150.8	9.17	51.29	51.53	15.86
61.06	12.65	164.71	25.4	51.58	20.72	7.68	87.68	84.62	125.42	7.8	38.97	96.51	67.47	57.71	11.03	160.96	10.69	64.6	19.12	6.85	69.67	61.75	153.75	10.72	19.26	88.62	40.16
69.87	13.89	120.88	28.69	99.04	19.88	11.49	159.29	154.93	242.3	11.12	41.27	97.26	63.94	43.43	22.77	219.79	11.48	61.9	52.42	10.36	72.15	69.71	116.36	3.46	45.23	96.62	59.91
56.32	52.44	189.04	17.93	15.31	93.12	27.74	175.21	173.82	241.87	8.74	27.51	99.21	71.87	103.09	99.84	128.76	5.76	37.4	96.84	77.53	74.26	72.3	179.3	13.33	22.01	97.35	40.32
115.81	111.63	171.29	8.26	25.74	96.39	65.17	27.31	8.75	61.78	15.01	92.98	32.05	14.17	71.38	67.46	111.32	5.48	45.92	94.51	60.6	70.94	44.57	150.43	18.16	83.64	62.83	29.63
40.97	15.65	112.88	14.51	31.96	38.19	13.86	15.12	10.08	34.89	8.53	29.13	66.7	28.9	51.32	17.69	117.65	13.97	46.77	34.46	15.03	55.03	33.11	161.14	11.6	45.23	60.17	20.55
131.2	128.05	157.19	8.84	26.14	97.6	81.46	129.55	125.87	187.83	8.12	29.92	97.16	67.02	43.44	36.21	80.23	7.71	16.32	83.36	45.13	34.97	19.33	113.57	9.15	38.47	55.28	17.02
132.75	129.73	204.82	10.65	31.64	97.73	63.34	27.38	11.39	76.48	11.7	40.87	41.58	14.89	157.72	155.27	227.1	8.69	44.2	98.45	68.37	59.35	15.38	109.15	8.22	53.54	25.91	14.09
57.16	32.5	139.97	10.52	40.8	56.87	23.22	127.95	123.95	207.69	10.93	29.58	96.87	59.68	44.72	36.28	148.79	9.18	16.94	81.14	24.39	136.13	130	243.61	10.11	42.16	95.49	53.36
134.75	130.77	196.52	9.66	31.31	97.04	66.54	45.07	27.07	167.11	11.49	51	60.06	16.2	65.92	40.33	132.55	8.45	45.39	61.18	30.43	147.24	139.83	236.39	9.76	31.28	94.97	59.15
144.35	136.67	264.94	11.58	36.72	94.68	51.59	116.42	110.33	193.14	8.77	27.43	94.76	57.12	55.55	26.11	128.46	10.08	25.81	47.01	20.33	48.32	44.86	88.16	4.68	48.83	92.83	50.88
90.54	87.7	173.01	11.49	23.8	96.86	50.69	66.24	39.52	229.3	11.38	45.39	59.66	17.23	62.49	32.85	108.11	14.76	36.04	52.58	30.39	136.03	132.83	284.09	8.86	34.09	97.64	46.75
157.81	156.95	242.39	8.78	41.63	99.45	64.75	38.39	21.09	95.02	9.78	27.51	54.94	22.19	45.85	26.03	120.71	8.29	26.52	56.78	21.57	101.68	93.4	128.93	5.64	44.02	91.86	72.45
31.51	14.73	54.68	3.86	41.77	46.73	26.93	53.42	19.2	133.27	11.98	39.89	35.94	14.4	59.48	37.16	146.17	17.05	24.73	62.47	25.42	86.45	74.77	216.22	13.19	24.48	86.49	34.58
25.34	17.61	58.37	3.76	42.94	69.49	30.17	25.62	5.86	77.08	6.37	59.07	22.89	7.61	121.61	118.65	155.74	4.67	34.09	97.57	76.18	56.6	28.39	150.54	10.48	41.27	50.16	18.86
77.53	58.1	221.72	12.14	39.42	74.93	26.2	32.79	2.5	87.48	14.38	48.28	7.61	2.85	43.9	24.03	114.12	9.12	22.53	54.73	21.05	64.54	59.52	227.56	10.99	25.16	92.22	26.16
116.41	111.92	173.72	10.18	21.08	96.15	64.43	4.64	3.59	13.66	1.49	167.82	77.31	26.26	44.67	27.77	86.12	5.49	33.09	62.17	32.25	55.3	31.31	126.45	9.61	32.22	56.62	24.76
166.09	164.13	260.79	9.23	35.62	98.82	62.94	149.4	145.33	210.45	6.82	27.49	97.27	69.06	47.16	9.19	152.87	9.06	29.58	19.49	6.01	29.9	17.46	63.57	4.03	35.2	58.42	27.47
34.36	19.85	100.7	6.31	66.8	57.76	19.71	9.37	4.57	30.57	1.71	45.76	48.76	14.94	38.83	20.94	121.63	16.7	68.07	53.94	17.22	76.71	60.25	234.67	9.21	54.4	78.54	25.67
55.13	44.05	213.55	9.54	40.58	79.89	20.63	42.23	30.01	91.69	4.75	30.95	71.06	32.73	50.09	28.46	134.58	9.35	53.65	56.82	21.15	60.75	42.83	198.81	12.11	42.24	70.5	21.54
67.19	61.96	163.73	9.16	16.32	92.21	37.84	60.16	45.28	220.83	16.23	30.27	75.27	20.5	52.53	21.92	185.67	10.82	58.48	41.73	11.81	33.53	18.77	115.41	7.33	18.36	55.97	16.26
69.4	66.76	158.08	10.41	16.32	96.19	42.23	58.29	39.91	212.33	12.04	60.53	68.47	18.8	32.89	6.38	69.05	5.15	51.58	19.38	9.23	56.68	39.01	145.5	9.88	45.4	68.82	26.81
62.85	55.07	149.95	9.85	24.64	87.61	36.72	130.65	126.83	184.68	7.47	28.09	97.07	68.67	86.5	43.69	176.53	9.66	29.43	50.51	24.75	26.52	11.44	71.25	10.22	63.92	43.15	16.06
33.81	13.6	99.65	10.05	29.24	40.21	13.65	154.3	144.13	210.27	15.9	18.79	93.41	68.55	21.3	12.4	60.97	2.92	30.61	58.23	20.34	46.53	16.02	105.9	8.8	46.96	34.42	15.12
28.14	6.45	88.98	7.76	42.24	22.91	7.25	52.6	5.03	203.43	22.73	101.87	9.56	2.47	72.88	66.88	137.2	5.88	48.15	91.77	48.74	82.39	75.86	130.22	9.45	15.64	92.07	58.25
43.51	35.09	112.31	22.76	40.87	80.64	31.24	48.67	12.64	165.54	12.77	76.09	25.96	7.63	63.98	51.45	176.99	13.69	17	80.42	29.07	54.53	30.72	213.18	11.96	57.02	56.33	14.41
50.3	31.8	213.56	10.87	50.32	63.21	14.89	84.89	70.82	155.74	8.87	46.62	83.43	45.47	32.72	9.1	86.47	5.15	83.22	27.82	10.53	162.12	159.91	228.48	9.78	31.96	98.64	69.99
43.15	22.07	116.08	7.51	54.34	51.14	19.01	58.16	54.13	181.57	13.1	28.11	93.08	29.81	42.89	16.22	127.11	14.81	44.2	37.82	12.76	75.89	74.31	203.32	8.48	31.68	97.92	36.55
26.33	3.06	75.28	22.36	42.63	11.61	4.06	108.49	104.19	234.39	11.56	32.01	96.03	44.45	68.4	64.64	194.26	12.14	21.76	94.51	33.27	142.07	137.08	219.7	8.01	33.44	96.49	62.4
43.73	10.87	132.59	10.74	57.09	24.86	8.2	48.41	25.66	110.99	10.09	77.52	53.01	23.12	59.66	55.12	138.29	10.32	14.61	92.39	39.86	161.66	159.08	249.75	11.25	38.96	98.4	63.69
163.17	160.57	216.58	11.36	32.77	98.4	74.14	90.49	36.93	162.28	15.71	33.01	40.81	22.75	87	73.75	228.96	14.1	34.79	84.77	32.21	101.57	89.76	105.18	2.54	27.1	88.37	85.33
19.43	12.78	62.16	4.65	31.28	65.77	20.56	60.2	32.91	154.43	8.05	38.76	54.67	21.31	177.99	175.77	246.16	10.89	37.14	98.75	71.4	159.34	157.62	220.39	10.45	34.09	98.92	71.52
173.04	167.82	218.88	9.49	34.74	96.99	76.67	35.42	25.89	121.45	9.68	14.96	73.09	21.31	138.59	134.72	236.84	9.61	35.77	97.21	56.88	34.02	8.33	122.4	15.31	48.62	24.48	6.8
64.95	42.63	126.98	8.54	28.12	65.63	33.57	14.43	5.27	51.11	5.23	68	36.55	10.32	48.24	23.24	144.37	10.32	35.77	48.17	16.09	32.53	21.38	91.49	5.19	41.96	65.73	23.37
24.17	12.25	97.79	8.51	51.08	50.7	12.53	69.11	43.63	151.72	17.06	19.7	63.14	28.76	63.89	42.29	225.22	11.69	40.36	66.2	18.78	65.07	42.3	213.41	10.52	48.83	65	19.82
123.18	121.84	178.1	9.77	27.28	98.91	68.41	68.79	16.6	167.31	12.69	24.48	24.13	9.92	41.88	33.94	87.84	14.24	28.86	81.03	38.63	50.64	43.3	171.69	12.63	16.51	85.51	25.22
57.61	50.64	185.99	10.48	27.92	87.91	27.23	50.06	31.66	180.99	10.56	41.75	63.25	17.5	78.04	77.14	190.51	8.22	20.4	98.85	40.49	166.5	162.97	259.55	18.54	38.76	97.88	62.79
58.17	54.77	111.1	4.28	46.92	94.17	49.3	59.64	41.59	141.53	9.76	39.18	69.73	29.38	170.07	164.79	253.93	16.2	49.64	96.9	64.9	115	112.79	162.58	8.19	27.51	98.07	69.37
24.48	10.44	81.1	4.67	40.8	42.64	12.87	39.77	14.7	90.29	8.36	29.92	36.97	16.28	58.24	36.53	159.44	9.85	49.28	62.72	22.91	121.42	117.77	232.44	8.9	26.82	97	50.67
60.55	56.87	135.85	9.8	18.74	93.92	41.87	46.17	19.04	192.62	11.2	16.94	41.24	9.88	153.68	151.41	234.67	8.31	40.58	98.52	64.52	48.03	9.31	193.44	9.54	36.88	19.38	4.81
75.52	73.95	110.73	9.04	20.63	97.92	66.78	57.41	27.98	224.24	12.71	57.75	48.73	12.48	57.41	43.14	195.51	13.28	41.09	75.14	22.07	63.05	55.12	207.25	14.91	15.21	87.42	26.6
123.18	113.36	181.4	8.41	27.46	92.03	62.49	26.17	8.73	81.08	10.95	94.58	33.38	10.77	60.17	26.58	120.37	9.53	38.21	44.18	22.09	149.01	145.83	211.49	6.77	37.97	97.87	68.95
80.46	78.01	136.1	6.95	43.83	96.95	57.31	40.64	38.21	63.25	3.05	38.27	94.03	60.42	29.97	8.44	59.1	5.31	37.14	28.15	14.27	54.5	28.36	145.38	9.06	38.52	52.03	19.51
48.6	22.45	155.76	10.85	48.28	46.19	14.41	25.07	13.81	80.15	7.01	40.58	55.09	17.23	128.68	125.05	184.67	7.2	27.11	97.18	67.72	103.04	97.63	187.37	9.32	34.79	94.76	52.11
82.8	75.53	164.27	10.22	14.96	91.22	45.98	40.54	11.59	74.37	6.71	56.4	28.58	15.58	140.15	134.69	159.16	5.27	37.4	96.11	84.62	130.48	127.48	212.7	7.64	27.92	97.7	59.93
126.16	118.82	189.37	14.26	27.14	94.18	62.74	34.18	16.25	96.62	7.48	47.31	47.55	16.82	114.85	107.23	230.76	9.91	22.44	93.37	46.47	22.8	9.16	79.28	6.59	42.94	40.16	11.55
137.22	133.09	237.77	10.01	31.15	96.99	55.97	30.63	25.66	68.18	4.34	36.72	83.76	37.63	27.81	4.59	64.33	5.02	79.1	16.51	7.14	20.72	13.39	63.26	3.05	44.71	64.63	21.17
144.77	142.4	211.83	11.22	25.45	98.37	67.23	41.25	18.28	105.83	8.96	72.08	44.31	17.27	10.04	6.39	31.25	6.56	43.83	63.61	20.45	91.06	87.44	158.89	7.96	27.14	96.03	55.03
68.29	46.79	190.83	10.41	37.57	68.51	24.52	54.73	52.11	197.07	10.25	24.07	95.2	26.44	51.92	42.09	113.23	13.16	34.09	81.08	37.18	62.53	42.3	220.52	13.11	48.96	67.65	19.18
69.51	65.63	158.84	10.16	16.32	94.41	41.32	53.24	21.06	110.53	8.75	45.39	39.56	19.05	77.65	67.38	103.9	5.08	41.96	86.78	64.85	25.39	15.63	51.48	4.24	33.07	61.59	30.37
73.16	68.2	172.04	10.9	30.6	93.22	39.64	157.22	150.94	203.05	9.7	28.56	96	74.34	51.52	21.66	148.09	10.93	45.59	42.05	14.63	133.28	127.15	215.82	8.21	28.56	95.4	58.91
38.47	7.22	79.59	6.54	42.84	18.78	9.08	50.95	20.55	96.67	6.43	45.92	40.34	21.26	89.6	86.58	170.7	8.84	26.52	96.62	50.72	52.33	17.43	127.07	9.92	56.4	33.32	13.72
108.02	101.05	190.49	10.45	26.52	93.55	53.05	91.65	87.35	144.05	7.73	16.32	95.32	60.64	156.38	151.8	252.78	8.89	21.3	97.07	60.05	117.55	113.39	259.04	17.5	32.33	96.46	43.77
62.77	60.12	148.14	10.52	16	95.78	40.58	52.58	44.31	174.49	10.5	29.92	84.28	25.4	57.38	28.56	190.45	12.36	53.72	49.78	15	43.06	33.95	162.22	10.29	28.34	78.83	20.93
161.86	158.83	195.45	22.46	29.92	98.13	81.27	65	59.87	216.19	9.2	17	92.11	27.69	99.04	41.79	197.33	10.79	43.52	42.2	21.18	169.55	168.33	266.08	11.24	41.14	99.28	63.26
125.47	96.85	221.65	16.95	32.84	77.19	43.69	36.88	20.48	87.13	4.73	67.49	55.53	23.5	74.62	70.39	143.73	9.97	17.19	94.33	48.97	121.47	54.44	258.14	14.92	23.12	44.81	21.09
40.57	35.69	131.9	9.46	16.58	87.98	27.06	129.71	127.24	214.28	9.7	29.92	98.1	59.38	108.79	107.36	147.86	9.64	20.2	98.68	72.61	97.33	93.36	243.28	8.64	30.26	95.92	38.38
47.41	4.86	128.79	16.65	95.16	10.26	3.78	59.65	49.27	176.92	8.53	38.08	82.6	27.85	37.07	15.93	110.04	9.78	34.79	42.97	14.48	58.13	48.16	124.78	7.55	40.36	82.86	38.6
85.12	64.82	193.48	12.64	22.01	76.15	33.5	97.76	91.21	285.22	11.41	28.53	93.3	31.98	18.47	6.52	50.93	4.45	45.92	35.3	12.8	105.8	95.57	158.11	13.5	37.84	90.33	60.45
67.31	53.59	171.74	13.62	29.92	79.62	31.2	32.77	17.1	121.27	7.57	54.27	52.17	14.1	55.43	25.68	122.7	7.49	32.99	46.33	20.93	82.43	80.76	133.46	5.99	36.18	97.97	60.51
144.57	140.63	213.87	8.66	31.34	97.28	65.76	52.35	13.33	103.99	7.5	56.28	25.47	12.82	161.57	160.01	215.17	8.51	32.7	99.04	74.37	143.29	138.27	193.45	6.18	35.77	96.5	71.48
136.47	135.44	148.13	5.94	28.12	99.24	91.43	41.01	6.51	95.2	10.61	85.68	15.87	6.83	65.58	14.41	117.85	6.11	32.52	21.97	12.23	152.13	145.83	263.97	9.89	37.4	95.86	55.25
48.36	14.64	130.54	13.08	29.43	30.28	11.22	65.19	47.46	189.18	10.1	28.56	72.8	25.09	93.01	89.81	153.69	8.36	41.96	96.56	58.44	6	3.27	25.2	1.97	58.46	54.4	12.96
45.72	18.54	156.08	11.56	52.17	40.55	11.88	37.1	6.91	140.9	18.79	166.6	18.61	4.9	108.7	105.97	242.57	11.54	29.58	97.48	43.69	25.33	19.44	81.94	4.19	66.64	76.75	23.73
145.86	136.64	260.58	10.24	27.88	93.67	52.43	36.62	21.73	114.27	13.16	54.4	59.34	19.02	44.49	16.43	105.41	10.74	91.52	36.94	15.59	66.75	63.21	204.21	8.06	39.89	94.69	30.95
86.8	55.2	210.15	16.22	23.12	63.6	26.27	128.97	125.65	252.25	13.01	34.91	97.43	49.81	48.72	13.24	187.12	12.72	68.29	27.18	7.08	52.53	50.12	90.79	3.78	53.58	95.42	55.2
105.06	97.03	158.49	9.12	16.88	92.35	61.22	131.33	128.92	237.07	9.2	34.68	98.17	54.38	161.86	161.68	197.15	10.42	29.58	99.88	82.01	47.91	32.1	137.68	7.96	53.39	67.01	23.32
126.32	122.98	219.38	10.9	27.86	97.36	56.06	163.88	161.01	245.15	9.26	37.4	98.25	65.68	88.31	83.61	180.01	9.63	22.27	94.67	46.45	73.92	43.28	218.81	12.2	35.36	58.55	19.78
155.25	150.05	203.76	9.26	32.64	96.65	73.64	130.18	128.97	217.85	9.57	30.95	99.07	59.2	34.32	10.73	76.21	4.31	63.23	31.26	14.08	47.65	39.32	174.1	8.32	29.24	82.52	22.59
36.78	23.51	143.26	9.1	29.57	63.93	16.41	70.49	65.07	162.84	10.98	16.32	92.31	39.96	76.54	75.23	187.47	10.26	18.36	98.29	40.13	92.89	91.1	149.47	7.51	25.74	98.07	60.95
59.24	10.24	198.56	16.2	32.33	17.29	5.16	59.28	51.47	200.82	11.25	29.57	86.82	25.63	76.43	75.08	186	9.82	20.66	98.23	40.37	135.82	128.77	209.09	9.49	31.68	94.81	61.59
61.43	35.38	161.52	18.44	52.27	57.6	21.91	137.25	134.32	206.87	10.2	31.28	97.86	64.93	171.66	169.48	253.23	9.92	39.44	98.73	66.93	81.23	64.6	145.34	3.73	52.96	79.53	44.45
56.3	48.05	177.63	13.71	21.69	85.36	27.05	73.95	63.53	191.02	9.73	21.32	85.9	33.26	42.98	2.06	93.09	11.86	171.79	4.79	2.21	162.75	158	238.96	10.7	44.71	97.08	66.12
70.44	63.86	207.33	14.41	15.64	90.66	30.8	56.55	38.28	186.77	9.82	41.27	67.69	20.5	72.98	70.86	211.67	11.2	19.72	97.1	33.48	82.64	78.89	273.77	10.46	37.83	95.46	28.82
154.35	145.79	238.52	9.35	27.27	94.45	61.12	149.23	146.08	210.17	12.88	29.49	97.89	69.5	85.84	83.2	162.02	9.25	15.25	96.93	51.35	53.41	45.62	185.36	12.46	35.49	85.42	24.61
53.18	30.26	195.73	11.29	37.51	56.9	15.46	124.54	120.75	210.46	9.41	29.58	96.96	57.38	18.97	13.35	50.29	3.3	37.76	70.39	26.55	149.69	145.62	242.95	10.96	37.83	97.28	59.94
145.16	142.6	182.83	10.59	20.87	98.24	78	101.82	91.88	194.43	9.9	19.04	90.24	47.26	162.33	161.65	265.54	9.93	41.48	99.58	60.88	127.65	125.68	227.97	9.41	23.12	98.46	55.13
58.23	25.48	139.12	9.36	26.4	43.76	18.32	13.86	11.98	20.47	7.94	3596.06	86.44	58.51	114.57	113.03	201.46	8.19	35.49	98.66	56.1	20.8	13	52.56	2.39	44.53	62.48	24.72
26.04	14.24	62.84	8.1	32.48	54.68	22.66	50.33	37.91	139.89	7.9	44.33	75.33	27.1	109.66	107.59	177.72	8.78	45.26	98.11	60.54	34.9	4.89	76.65	7.59	61.9	14	6.38
149.52	141.23	188.82	9.47	24.93	94.45	74.8	86.99	82.49	157.12	9.52	15.64	94.82	52.5	92.95	87.29	191.01	7.82	29.24	93.91	45.7	37.62	13.44	118.31	6.99	57.12	35.73	11.36
24.81	6.51	65.99	5.1	50.01	26.22	9.86	13.99	6.35	41.66	2.68	71.67	45.42	15.25	41.96	0.7	195.94	18.06	346.11	1.68	0.36	74.97	69.65	105.91	4.59	39.89	92.9	65.76
42.56	15.93	95.08	12.37	57.02	37.42	16.75	169.46	166.71	253.21	9.87	44.88	98.37	65.84	42.84	18.79	81.73	6.33	42.84	43.87	22.99	15.01	10.44	47.14	6.99	54.4	69.58	22.15
59.05	49.05	99.66	4.47	40.8	83.07	49.22	26.95	23.94	67.26	4.08	28.2	88.8	35.59	69.7	64.46	199.12	15.51	25.16	92.48	32.37	120.6	120.12	136.82	7.06	22.96	99.6	87.79
90.38	84.38	225.01	10.76	26.52	93.36	37.5	59.48	44.51	84.77	3.79	36.45	74.84	52.51	76.27	66.14	191.06	11.95	27.83	86.72	34.62	148.53	144.51	233.82	11.77	39.2	97.29	61.8
68.91	66.46	92.83	3.06	41.27	96.44	71.59	47.63	19.16	105.81	7.31	45.92	40.22	18.11	57.2	49.77	180.99	10.94	24.44	87.02	27.5	57.05	23.56	157.77	10.62	44.88	41.3	14.94
85.31	83.65	160.41	11.09	20.91	98.05	52.15	140.42	139.28	247.75	11.81	27.83	99.19	56.22	51.42	33.64	166.77	10.57	41.43	65.43	20.17	74.99	70.82	124.69	8.82	12.52	94.44	56.79
148.88	140.11	210.54	9.95	24.35	94.11	66.55	17.47	8.9	48.54	5.94	174.08	50.94	18.33	36.95	9.84	80.29	5.86	41.32	26.62	12.25	80.58	78.52	139.46	12.49	22.27	97.44	56.3
51.67	45.52	174.18	9.47	29.24	88.11	26.14	89.74	83.07	118.3	5.46	38.52	92.56	70.22	44.94	37.37	210.66	10.03	44.2	83.16	17.74	98.33	88.98	125.16	17.37	20.87	90.5	71.09
44.26	33.01	108.44	12.5	39.89	74.58	30.44	149.26	144.39	193.85	9.6	27.14	96.74	74.49	57.5	39.62	159.49	10.55	38.08	68.91	24.84	114.57	111.88	182.55	8.76	21.89	97.66	61.29
65.91	61.61	131.44	9.76	24.48	93.49	46.88	18.41	12.24	50.64	3.31	29.44	66.47	24.16	35.52	8.12	77.32	8.43	44.88	22.86	10.5	96.18	88.14	223.99	11.43	33.71	91.63	39.35
123.87	119.82	199.2	8.63	31.86	96.73	60.15	71.62	33.19	155.91	21.4	49.52	46.34	21.29	36.65	24.96	56.39	3.2	36.04	68.11	44.27	120.34	119.33	155.5	9.12	23.62	99.16	76.74
111.92	108.21	180.49	9.47	22.44	96.69	59.95	92.9	86.86	179.11	10.78	15.82	93.5	48.5	67.88	63.72	192.71	9.12	13.6	93.87	33.07	149.43	147.17	191.57	9.23	39.66	98.49	76.82
52.32	47.43	156.17	11.45	20.42	90.65	30.37	79.63	76.97	132.24	11.05	28.49	96.66	58.2	76.99	64.61	207.5	12.18	22.44	83.92	31.14	30.68	3.96	49.18	2.48	37.4	12.92	8.06
66.2	61.84	186.58	11.61	34.03	93.41	33.14	59.33	37.81	173.31	10.24	43.52	63.73	21.82	51.37	38.19	142.91	8.36	25.16	74.34	26.72	130.8	129.31	272.3	10.28	29.22	98.86	47.49
51.98	27.82	135.2	11.36	26.52	53.52	20.58	70.64	68.46	151.87	9.47	14.28	96.91	45.08	124.54	121.3	213.69	10.03	25.74	97.4	56.76	78.31	73.48	106.95	4.87	23.12	93.84	68.71
159.23	155.18	219.87	9.3	33.48	97.46	70.58	136.67	132.73	244.51	12.21	34	97.12	54.28	64.3	54.23	169.31	10.92	39.18	84.33	32.03	71.3	62.19	94.01	3.42	42.47	87.23	66.16
137.02	130.36	183.8	17.36	29.11	95.14	70.93	133	131.23	226.69	9.95	35.08	98.67	57.89	61.48	23.92	155.59	9.91	47.6	38.9	15.37	26.8	6	58.23	5.13	47.46	22.4	10.31
79.78	75.56	190.44	12.63	16.32	94.71	39.67	25.95	5.13	71.18	13.42	149.94	19.75	7.2	32	12.46	99.47	14.22	114.24	38.93	12.53	115.74	91.1	212.95	32.05	22.7	78.7	42.78
17.6	6.81	77.39	8.21	40.83	38.68	8.8	121.26	120.65	206.08	10.73	38.52	99.5	58.55	37.99	17.06	104.85	9.41	30.61	44.91	16.27	98.51	94.97	190.23	10.41	33.01	96.41	49.92
47.14	35.61	173.39	13.5	34.91	75.54	20.54	79.83	78.37	145.24	9.7	18.36	98.18	53.96	50.56	21.91	133.97	12.46	78.85	43.34	16.36	74.16	63.92	227.49	22.71	27.2	86.19	28.1
38.27	14.33	100.08	7.16	56.44	37.44	14.32	118.64	112.04	244.05	10.39	42.16	94.43	45.91	109.26	104.47	206.11	13.06	24.35	95.62	50.69	35.2	23.29	123.96	8.27	17.64	66.16	18.79
47.46	31.3	182.73	12.08	41.27	65.95	17.13	63.9	48.43	228.12	9.83	57.06	75.79	21.23	126.12	123.5	238.04	7.93	36.45	97.92	51.88	98.98	95.29	206.79	9.25	23.12	96.27	46.08
94.29	87.29	157.68	6.74	19.95	92.58	55.36	109.38	106.75	234.98	9.43	32.7	97.59	45.43	27.71	19.04	99.62	6.79	64.65	68.69	19.11	24.44	9.05	62.99	5.57	48.15	37.02	14.36
103.94	99.51	216.83	9.7	23.12	95.74	45.89	142.49	139.54	191.35	5.61	37.14	97.93	72.92	61.74	50.37	199.66	9.65	38.52	81.58	25.23	146.8	105.75	209.26	23.04	23.31	72.04	50.54
37.03	27.22	93.26	9.38	25.45	73.5	29.18	48.81	7.81	148.14	14.73	81.41	16	5.27	49.41	44.54	197.07	9.63	44.2	90.14	22.6	146.15	142.45	195.9	10.16	32.64	97.47	72.71
84.75	56.13	192.85	9.05	29.92	66.22	29.1	43.81	17.67	112.65	8.74	63.32	40.34	15.69	24.89	9.76	102.79	7.52	30.6	39.2	9.49	69.03	28.67	159.66	11.61	29.06	41.54	17.96
130.01	120.54	206.48	9.25	38.72	92.71	58.38	102.55	99.35	232.43	11.57	37.83	96.88	42.74	30.46	12.12	114.95	7.13	58.45	39.77	10.54	26.71	7.32	77.3	6.06	51.18	27.43	9.48
31.61	13.27	64.32	7.92	15.82	41.98	20.63	142.7	141.96	244.7	9.11	44.2	99.48	58.01	45.49	16.36	142.09	11.8	44.53	35.96	11.51	95.87	94.57	180.16	9.44	30.26	98.64	52.49
80.52	78.35	128.09	9.16	20.63	97.3	61.17	35.71	13.33	90.06	8	51.04	37.32	14.8	120.98	117.78	249.22	7.49	29.55	97.35	47.26	56.61	21.33	183.8	12.97	43.65	37.68	11.61
72.7	71.09	152.41	11.25	16.51	97.79	46.65	81.1	77.11	259.41	12.42	31.96	95.08	29.73	27.98	10.5	73.49	5.06	44.17	37.52	14.29	110.39	108.3	261.5	9.5	32.95	98.1	41.41
155.98	150.69	183.38	10.75	25.24	96.61	82.18	53.37	48.57	93.38	3.8	47.31	91	52.01	172.78	170.65	253.31	9.76	42.84	98.76	67.37	138.43	134.05	244.67	10.89	36.04	96.83	54.79
131.75	126.93	179.34	9.65	32.91	96.34	70.78	107.81	103.65	201.1	11.01	23.12	96.14	51.54	138.85	136.19	221.89	8.99	37.57	98.08	61.38	153.37	146.16	185.12	9.95	25.45	95.3	78.96
22.8	8.21	50.59	4.7	55.02	36.02	16.24	73.43	50.3	105.43	8.32	36.72	68.5	47.71	91.2	89.9	142.55	7.9	24.76	98.57	63.06	141.33	129.85	259.74	19.36	36.88	91.88	49.99
37.98	28.47	106.85	9.38	26.52	74.94	26.64	19.58	6.4	57.6	4.15	49.28	32.7	11.11	99.69	95.12	158.89	7.77	23.8	95.41	59.86	112.09	110.67	216.51	9.28	24.07	98.73	51.11
46.91	21.64	103.01	24.2	50.32	46.14	21.01	74.8	65.49	239.82	10.23	28.56	87.56	27.31	37	17.89	89.56	5.7	54.34	48.35	19.98	50.31	18.01	202.86	10.49	64.6	35.8	8.88
124.24	117.67	191.25	21.19	32.7	94.71	61.52	27.4	7.5	85.05	12.31	78.88	27.38	8.82	31.47	9.98	85.83	8.32	21.76	31.72	11.63	112.08	110.45	160.56	10.45	22.7	98.55	68.79
25.02	13.7	75.27	5.43	27.78	54.77	18.21	16.74	4.04	39.28	3.05	62.65	24.13	10.29	97.51	88.57	221.65	17.9	42.16	90.83	39.96	81.77	31.89	150.84	11.09	63.32	39	21.14
142.74	139.28	202.45	8.97	30.6	97.58	68.8	76.48	13.76	132.75	26.42	260.89	17.99	10.36	41.27	36.3	132.97	10.81	29.92	87.95	27.3	49.62	29.33	136.79	8.74	45.56	59.11	21.44
77.65	75.7	141.48	10.57	24.07	97.5	53.51	59.98	58.52	102.43	7.43	17	97.56	57.13	59.05	49.38	114.96	7.98	37.4	83.63	42.96	130.8	128.3	219.37	10.6	34.61	98.08	58.48
62.81	44.59	190.65	10.49	53.5	70.99	23.39	135.65	134.78	233.97	9.48	38.08	99.36	57.61	54.9	32.98	247.33	10.95	93.84	60.07	13.33	121.87	105.76	196.96	10.99	37.14	86.78	53.69
48.31	22.57	188.48	12.49	51.58	46.73	11.98	145.53	142.8	252.5	9.34	42.64	98.12	56.56	48.6	25.28	147.08	9.84	44.2	52.01	17.19	128.92	128.1	158.51	9.3	22.96	99.36	80.81
110.75	108.66	186.21	10.2	27.62	98.12	58.35	31.78	10.1	83.75	8.49	17	31.78	12.06	110.85	106.37	286.9	12.45	27.14	95.95	37.07	50.5	45.67	99.12	5.09	43.65	90.43	46.07
51.66	44.89	120.45	11.52	20.42	86.89	37.27	131.19	130.93	186.15	10.24	22.01	99.81	70.34	151.26	150.42	233.98	8.01	33.32	99.44	64.29	58.26	21.56	162	11.3	53.43	37.01	13.31
63.97	62.8	105.24	6.6	31.64	98.16	59.67	128.8	126.96	229.64	10.79	35.62	98.57	55.29	70.04	68.68	141.28	10.15	22.94	98.06	48.62	56.46	37.98	158.97	13.76	36.04	67.27	23.89
117.25	113.63	201.36	9.09	26.82	96.91	56.43	59.45	43.06	184.15	10.52	51.59	72.43	23.38	73.14	69.08	116.34	6.79	18.34	94.46	59.38	91.25	89.91	206.1	11.21	32.33	98.52	43.62
45.07	41.98	101.35	8.83	11	93.14	41.42	97.69	96.21	219.39	8.38	37.76	98.48	43.85	25.48	21.63	54.93	3.66	29.92	84.88	39.37	22.58	13.04	77.65	4.13	57.8	57.75	16.79
46.97	21.5	110.04	8.07	21.86	45.78	19.54	47.22	24.33	166.18	8.65	50.32	51.52	14.64	23.34	9.69	56.22	6.67	15.82	41.5	17.23	107.78	103.05	174.24	9.08	25.16	95.62	59.15
71.69	69	101.45	3.59	33.66	96.25	68.01	31.45	9.82	70.05	4.66	47.31	31.23	14.02	87.9	85.41	201.27	9.13	20.4	97.17	42.44	21.65	16.15	79.59	4.11	56.4	74.57	20.28
43.66	13.18	123.73	15.41	41.96	30.19	10.66	88.96	84.64	186.64	8.31	31.28	95.14	45.35	147.59	146.67	199.63	11.69	33.51	99.38	73.47	55.44	0.56	156.47	21.28	258.39	1.01	0.36
37.54	6.7	76.01	9.54	51.58	17.85	8.81	144.04	142.21	229.39	9.54	43.52	98.73	62	26.94	13.74	72.6	5.61	49.34	51	18.93	120.05	118.15	159.91	7.52	28.86	98.42	73.88
175.69	169.09	212.79	6.36	40.12	96.24	79.46	109.5	107.07	207.27	7.32	37.83	97.78	51.66	72.51	71.21	178.6	9.5	19.04	98.21	39.87	104.51	102.53	178.62	11.26	27.81	98.11	57.4
34.87	25.39	175.36	9.44	33.98	72.83	14.48	103.11	100.23	224.57	12.39	39.44	97.21	44.63	136.07	133.83	233.23	7.51	39.02	98.36	57.38	45.21	12.81	148.63	23.76	21.08	28.33	8.62
86.7	72.72	232.8	13	27.2	83.87	31.24	62.35	60.9	66.36	2.16	25.84	97.68	91.77	57.67	24.22	159.76	11.59	50.69	42	15.16	147.42	142.53	201.92	10.02	32.33	96.68	70.59
23.97	7.98	102.95	10.26	21.17	33.3	7.75	146.3	145.91	246.7	9.06	45.56	99.73	59.14	122.92	121.01	214.51	9.7	36.04	98.44	56.41	93.47	89.51	108.14	4.68	41.96	95.77	82.77
144.24	143.13	172.9	8.25	33.61	99.23	82.78	61.83	59.48	174.14	12.31	19.21	96.2	34.15	88.86	87.72	206.42	8.6	28.56	98.71	42.5	87.78	86.16	120.39	5.24	39.89	98.15	71.56
111.63	106.65	160.52	8.2	26.75	95.54	66.44	50.58	46.4	139.27	10.1	21.76	91.73	33.31	31.99	9.86	75.47	4.12	58.46	30.84	13.07	133.33	130.28	241.77	17.41	22.58	97.71	53.88
86.58	79.64	142.18	7.68	14.61	91.99	56.02	139.66	136.32	257.13	8.77	40.12	97.6	53.01	39.98	22.21	107.38	9.88	26.52	55.54	20.68	154.81	146.51	304.45	17.86	44.02	94.64	48.12
103.33	94.87	172.85	11.63	15.16	91.81	54.88	124.41	117.23	215.83	11.71	28.42	94.23	54.32	175.38	173.63	232.98	11.16	43.52	99	74.52	52.09	42.23	109.78	7.61	33.32	81.06	38.46
47.67	22.2	131.1	10.86	30.95	46.58	16.94	95.96	95.02	174.38	9.09	35.08	99.03	54.49	49.97	46.5	66.7	2.17	44.2	93.04	69.71	86.22	82.09	214.05	11.05	17.6	95.21	38.35
34.18	10.49	119.74	11.97	15.13	30.7	8.76	19.81	15.56	35.18	15.96	256.66	78.54	44.21	137.11	135.48	207.9	11.33	37.14	98.82	65.17	34.91	6.6	107.51	6.82	48.96	18.91	6.14
120.98	114.22	194.94	11.34	22.96	94.42	58.59	100.48	98.34	213.83	8.27	42.84	97.87	45.99	32.13	8.49	75.58	5.34	57.12	26.43	11.24	97.32	94.63	177.83	10.67	19.72	97.24	53.21
161.33	154.68	217.39	8.79	33.01	95.87	71.15	99.22	97.55	168.27	10.68	35.08	98.31	57.97	96.28	92.23	204.66	8.81	25.74	95.79	45.06	45.56	9.68	154.76	7.75	84.32	21.24	6.25
73.38	70.36	195.73	10.93	17.19	95.89	35.95	38.12	22.94	110.82	6.19	43.52	60.18	20.7	47	23.92	94.59	6.95	48.28	50.9	25.29	159.74	156.57	231.71	10.02	42.16	98.02	67.57
77.41	74.62	180.21	12.13	15.82	96.39	41.41	64.19	10.81	142.21	8.64	46.3	16.84	7.6	139.17	130.55	271.42	13.57	37.14	93.8	48.1	126.77	123.07	239.24	11.43	28.53	97.08	51.44
21.35	5.49	87.34	5.75	103.17	25.7	6.28	101.5	88.84	229.42	12.18	37.29	87.52	38.72	125.95	122.72	255.28	9.92	37.83	97.44	48.07	34.43	13.15	89.81	6.65	74.28	38.19	14.64
135.06	131.12	217.76	8.13	30.61	97.09	60.21	34.98	28.49	196.67	12.22	19.48	81.43	14.48	30.84	29.67	63.42	4.86	22.44	96.22	46.78	30.09	25.73	72.98	4.49	35.77	85.52	35.26
25.06	12.29	70.62	5.23	17.73	49.05	17.41	57.68	38.47	213.7	9.68	47.46	66.69	18	25.07	9.5	83.99	8.1	82.54	37.9	11.31	71.34	67.04	217.63	8.79	20.87	93.97	30.8
78.72	73.88	231.09	11.58	18.34	93.86	31.97	93.36	80.11	252.9	13.37	27.51	85.81	31.68	123.1	120.32	283.27	10.06	36.45	97.75	42.48	134.3	132.89	209.65	8.36	40.12	98.94	63.38
75.72	74.07	210.93	11.05	25.05	97.82	35.12	168.28	159.47	285.18	10.84	36.88	94.76	55.92	111.53	109.19	220.56	8.25	32.7	97.9	49.51	160.69	157.65	243.95	9.2	34.79	98.11	64.63
101.65	100.36	220.98	9.02	30.95	98.73	45.42	70.84	65.93	113.7	4.88	45.05	93.07	57.98	114.91	110.65	214.77	11.42	36.72	96.29	51.52	139.26	129.16	205.19	11.81	32.7	92.74	62.94
60.56	43.41	140.4	21.91	114.92	71.68	30.92	77.39	70.24	115.76	4.59	34.39	90.76	60.68	150.78	145.14	252.06	8.88	38.76	96.26	57.58	81.64	78.01	155.33	9.51	17.32	95.56	50.22
18.79	8.15	53.86	5.36	83.77	43.37	15.13	130.08	127.46	235.69	11.15	37.83	97.99	54.08	120.77	112.29	154.02	7.72	37.4	92.98	72.91	38.55	30.75	79.89	4.2	50.79	79.77	38.5
94.39	93.67	252.61	10.59	34	99.24	37.08	157.76	154.41	217.99	7.98	43.88	97.88	70.84	72.22	69.39	106.04	7.35	11.68	96.08	65.44	87.1	47.46	98.84	2.45	42.64	54.48	48.01
34.21	30.24	89.15	4.8	37.4	88.4	33.92	126.05	121.19	248.31	10.95	38.27	96.14	48.81	142.79	140.17	226.75	10.64	35.65	98.17	61.81	129.97	128.32	170.78	6.46	31.31	98.73	75.14
126.32	124.24	210.99	10.02	34.59	98.35	58.88	25.53	9.16	95.72	7.45	71.81	35.87	9.57	59.07	42.26	130.87	7.88	44.02	71.55	32.29	55.13	35.34	137.73	8.05	41.53	64.11	25.66
43.36	17.43	158.03	13.04	57.09	40.2	11.03	134.83	129.83	235.02	9.41	34.19	96.29	55.24	38.13	20.7	85.89	5.41	29.92	54.29	24.1	150.62	145.64	225.95	10.89	39.41	96.69	64.46
107.63	105.71	233.2	10.84	38.08	98.22	45.33	89.17	86.33	223.45	10.28	44.53	96.8	38.63	141.5	137.73	224.76	8.93	40.12	97.34	61.28	77.46	62.15	154.69	16.6	40.99	80.23	40.18
85.08	83.88	210.03	8.72	24.86	98.59	39.94	24.67	12.66	51.03	13.76	83.35	51.33	24.81	66.88	55.12	99.32	5.34	36.72	82.42	55.5	79.63	20.88	173.33	10.53	41.05	26.22	12.05
69.4	65.5	185.82	7.79	27.51	94.38	35.25	42.26	23.07	117.96	8.07	41	54.6	19.56	141.91	137.2	247.29	10.36	37.83	96.69	55.48	49.73	19.13	79.42	3.12	41.05	38.47	24.09
88.47	86.27	268.36	8.37	30.95	97.51	32.14	106.92	91.56	236.27	8.93	53.04	85.63	38.75	40.42	22.98	123.16	9.85	45.56	56.85	18.66	54.96	47.07	153.34	9.35	17	85.65	30.7
19.08	12.33	72.18	3.98	79.1	64.62	17.08	49.61	14.21	109.35	10.31	55.08	28.64	12.99	118.08	114.47	233.24	12.65	41.81	96.94	49.08	131.74	129.89	247.17	10.36	41.75	98.6	52.55
152.34	148.37	197.07	8.46	32.91	97.39	75.29	150.52	148.92	248.52	11.36	42.44	98.94	59.92	159.26	158.33	241.25	8.71	40.83	99.42	65.63	77.95	7.58	240.9	13.37	51.29	9.72	3.14
118.88	118.33	175.27	11.13	28.34	99.54	67.51	36.72	22.5	111.36	9.93	61.95	61.27	20.21	41.13	22.58	155.34	9.48	52.88	54.91	14.54	79.77	75.29	235.04	9.83	27.14	94.38	32.03
48.5	16.05	131.96	12	74.98	33.09	12.16	23.19	11.45	47.42	2.25	46.92	49.36	24.14	157.61	153.91	287.21	21.73	38.96	97.65	53.59	135.39	124.84	313.86	18.54	37.14	92.21	39.78
112	110.53	225.31	9.3	36.45	98.69	49.06	69.68	68.11	167.85	8.91	38.52	97.75	40.58	98.58	94.31	195.98	11.08	15.13	95.66	48.12	27.33	8.4	75.52	5.07	36.04	30.74	11.13
93.15	85.35	244.15	10.73	20.66	91.63	34.96	60.32	56.88	248.26	9.07	34	94.3	22.91	118.42	115.07	178.6	7.18	26.52	97.17	64.43	148.42	139.78	238.82	15.4	40.12	94.18	58.53
84.82	83.5	263.77	9.81	31.28	98.44	31.66	160.99	159.06	254.81	9.19	46.24	98.8	62.42	41.5	36.28	86.3	5.67	43.05	87.41	42.03	97.33	93.18	242.57	11.62	21.05	95.73	38.41
50.78	11.39	196.62	11.74	94.52	22.44	5.8	154.63	150.03	265.4	9.34	29.58	97.02	56.53	58.51	57.97	105.09	3.82	46.08	99.08	55.16	75.9	57.54	262	12.22	44.4	75.8	21.96
91.04	85.16	282.78	9.53	28.11	93.54	30.12	41.48	38.93	72.49	4.52	33.55	93.84	53.7	142.01	131.57	265.08	15.95	36.33	92.65	49.63	43.05	7.43	108.5	6.98	61.21	17.25	6.84
129.49	128.36	225.02	7.19	40.8	99.12	57.04	71.45	70.16	158.15	9.9	33.79	98.2	44.36	75.61	72.77	122.44	7.67	14.28	96.23	59.43	36.93	13.02	70.32	16.14	86.28	35.27	18.52
72.2	49.55	170.44	9.34	34.39	68.63	29.08	76.61	74.99	115.9	4.57	48.83	97.89	64.7	143.08	141.81	231.54	9.3	30.48	99.11	61.24	82.72	74.11	124.82	5.3	43.88	89.59	59.37
153.47	150.29	297.91	9.14	39.89	97.93	50.45	152.48	150.2	267.31	9.56	39.59	98.51	56.19	26.57	4.93	72.88	6.74	44.2	18.54	6.76	26.5	7.14	60.15	3.49	55.51	26.95	11.88
124.45	122.49	261.29	9.14	34.39	98.43	46.88	133.07	129.65	251.06	10.28	38.01	97.43	51.64	141	137.57	279.52	11.37	30.61	97.56	49.21	47.53	9.97	115	11.81	45.07	20.97	8.67
89.84	86.34	171.54	7.95	30.56	96.11	50.33	63.64	54.16	205.5	14.12	21.76	85.1	26.35	150.94	148.23	294.95	10.03	31.75	98.21	50.26	147.47	142.78	192.37	11.12	20.91	96.82	74.22
50.4	48.66	81.84	4.53	46.24	96.56	59.46	106.56	101.22	212.62	8.41	44.02	94.98	47.6	95.53	92.56	208.52	9.61	25.74	96.89	44.39	115.65	109.93	212.28	10.51	33.4	95.06	51.79
58.8	51.99	203.38	11.87	43.52	88.41	25.56	126.22	123.49	129.2	4.88	12.24	97.84	95.58	123.27	120.23	209.41	10.12	25.74	97.54	57.42	124.07	120.86	183.93	9.68	27.88	97.41	65.71
66.92	58.35	111.06	5.45	41.96	87.19	52.54	47.34	14.64	124.81	9.13	57.77	30.93	11.73	75.47	70.86	159.39	8.03	33.79	93.89	44.46	83.45	82.64	115.2	5.09	28.89	99.03	71.74
46.4	16.29	101.56	10.19	66.92	35.11	16.04	84.94	73.8	217.02	6.45	53.65	86.89	34.01	114.92	114	186.4	9.93	28.2	99.2	61.16	132.85	127.73	193.61	10.09	31.28	96.14	65.97
137.34	77.4	258.41	11.66	39.2	56.36	29.95	111.93	109.59	206.21	9.88	28.2	97.92	53.15	142.41	141.37	176.59	8.13	27.14	99.27	80.06	120.22	116.34	234.27	10.36	22.96	96.77	49.66
136.93	86.29	262.82	14.3	37.14	63.02	32.83	82.41	79.5	180.33	9.75	28.89	96.46	44.08	146.05	142.02	231.52	10.81	32.7	97.24	61.34	136.01	130.77	204.09	7.9	38.76	96.15	64.07
74.06	61.45	95.04	3.13	52.27	82.98	64.66	73.96	70.45	160.31	11.41	19.7	95.26	43.95	50.58	31.23	143.12	18.23	33.01	61.73	21.82	114.56	111.71	158.2	8.38	23.12	97.51	70.61
144.29	143.51	251.3	10.18	29.92	99.46	57.11	131.16	80.59	248.2	18.82	35.49	61.44	32.47	167.23	162.55	245.56	9.44	38.58	97.2	66.2	40.61	21.31	95.2	7.15	51.39	52.48	22.39
78.54	73.55	175.55	9.3	18.36	93.65	41.9	110.14	106.91	231.09	9.64	29.24	97.07	46.26	93.09	92.08	166.6	9.55	34	98.92	55.27	136.6	133.2	261.04	9.74	30.95	97.51	51.03
96.03	94.07	207.09	8.8	40.58	97.95	45.42	56.24	53.36	101.5	10.61	13.14	94.89	52.58	46.57	38.29	97.74	7.85	54.97	82.23	39.18	144.66	137.29	279.97	11.47	40.13	94.91	49.04
126.35	123.96	185.77	13.8	30.26	98.11	66.73	109.43	105.2	213.85	9.98	19.38	96.14	49.19	110.07	108.25	176.35	7.92	27.2	98.34	61.38	153.62	150.6	246.48	8.07	38.76	98.04	61.1
132.6	130.62	226.04	12.21	28.89	98.51	57.79	97.36	92.2	235	9.64	32.64	94.7	39.23	49.81	9.72	157.4	20.08	31.96	19.51	6.18	60.2	31.37	217.94	12.61	68.49	52.11	14.39
78.11	72.98	100.08	2.63	45.14	93.43	72.92	109.02	106.08	170.9	9.02	22.7	97.3	62.07	56.83	29.31	140.37	8.89	38.47	51.58	20.88	70.92	68.09	227.68	9.45	25.84	96.01	29.91
26.3	14.04	75.54	3.81	42.63	53.37	18.58	112.16	108.27	204.43	9.89	24.07	96.54	52.96	123.13	121.76	198.44	9.96	33.59	98.89	61.36	104.97	97.97	244.23	11.66	23.41	93.33	40.12
106.12	101.54	183.56	9.07	21.82	95.69	55.32	56.61	35.41	191.13	10.59	36.45	62.56	18.53	134.81	131.93	209.05	7.24	32.64	97.86	63.11	62.49	31.96	184.69	10.55	28.03	51.15	17.31
15.46	7.97	49.81	3.2	61.95	51.52	15.99	69.03	54.39	170.79	13.45	22.44	78.8	31.85	114.2	111.36	201.8	9.31	33.7	97.52	55.19	160.47	158.38	226.17	9.62	37.4	98.69	70.03
51.84	46.91	132.78	10.22	23.94	90.49	35.33	106.03	101.79	181.18	10.68	22.96	96	56.18	117.53	115.2	203.45	9.88	25.74	98.01	56.62	102.1	100.36	153.21	8.08	24.22	98.29	65.51
55.64	53.19	189.73	9.62	22.01	95.6	28.04	76.96	73.42	169.85	7.82	19.19	95.41	43.23	133.18	94.02	224.03	20.56	25.45	70.6	41.97	145.65	142.66	204.31	10.88	31.31	97.94	69.82
157.1	153.22	210.01	10.94	32.33	97.53	72.96	140.36	132.65	219.08	16.93	27.4	94.51	60.55	102.64	99.12	256	10.05	21.64	96.57	38.72	53.37	34.41	151.97	9.51	25.84	64.47	22.64
94.86	92.15	162.97	9.93	21.08	97.14	56.54	92.79	88.18	167.96	8.49	20.63	95.03	52.5	149.48	142.71	188.12	9.67	20.4	95.47	75.86	89.3	83.45	114.26	4.59	43.52	93.44	73.04
123.89	119.21	256.5	14.37	36.88	96.22	46.48	102.73	95.9	202.39	8.9	24.76	93.35	47.38	17.28	3.61	36.21	2.24	38.26	20.9	9.98	143.13	138	226.56	10.31	36.18	96.42	60.91
123.68	122.8	180.01	8.59	34.91	99.29	68.22	141.29	138.78	211.57	11.83	25.16	98.22	65.59	139.83	133.99	250.78	8.62	38.81	95.83	53.43	108.99	104.06	210.5	10.77	21.76	95.48	49.44
8.85	5.35	35.87	2.44	55.08	60.41	14.9	36.24	17.12	117.75	11.6	29.21	47.23	14.54	105.26	101.91	224.18	10.74	31.31	96.83	45.46	109.86	94.16	120.15	3.89	27.02	85.71	78.36
139.42	137.56	243.08	13.81	38.47	98.67	56.59	112.86	109.96	193.56	11.15	20.87	97.44	56.81	133.18	131.09	193.59	8.23	31.72	98.43	67.71	36.51	4.8	154.63	11.18	22.44	13.15	3.11
[truncated: 1,105 more rows]
